# Supplementary material for: Synthesis and Multiple Subsequent Reactivity of Anionic cyclo‐E3 Ligand Complexes (E=P, As)
Source: PubMed Central journal article supplement — Angew Chem Int Ed Engl. 2021 Jun 1;60(27):15101–8. doi: 10.1002/anie.202103683 (PMC8251822; doi:10.1002/anie.202103683), 2021-06-01
Supplement: ANIE-60-15101-s001.pdf [file ANIE-60-15101-s001.pdf]

Supporting Information

**Synthesis and Multiple Subsequent Reactivity of Anionic *cyclo-E*<sub>3</sub> Ligand Complexes (E = P, As)**

*Martin Piesch, Stephan Reichl, Michael Seidl, Gábor Balázs, and Manfred Scheer\**

anie\_202103683\_sm\_miscellaneous\_information.pdf

## Supporting Information

### Content

|                                                                                                                                                                                                                                                    |    |
|----------------------------------------------------------------------------------------------------------------------------------------------------------------------------------------------------------------------------------------------------|----|
| 1. Synthetic procedures and experimental details.....                                                                                                                                                                                              | 4  |
| 1.1 Synthesis of $[\text{K}(\text{thf})_{0.7}][\text{Cp}^*\text{Co}(\eta^3\text{-P}_3)]$ ( $[\text{K}(\text{thf})_{0.7}][5]$ ) and $[\text{K}(18\text{-c-6})][\text{Cp}^*\text{Co}(\eta^3\text{-P}_3)]$ ( $[\text{K}(18\text{-c-6})][5]$ ) .....   | 5  |
| 1.2 Synthesis of $[\text{K}(\text{thf})_{0.8}][\text{Cp}^*\text{Co}(\eta^3\text{-As}_3)]$ ( $[\text{K}(\text{thf})_{0.7}][6]$ ) and $[\text{K}(18\text{-c-6})][\text{Cp}^*\text{Co}(\eta^3\text{-As}_3)]$ ( $[\text{K}(18\text{-c-6})][6]$ ) ..... | 6  |
| 1.3 Reaction of $[\text{K}(\text{thf})_{0.7}][5]$ with $\text{Ph}_2\text{PCl}$ .....                                                                                                                                                               | 7  |
| 1.4 Reaction of $[\text{K}(\text{thf})_{0.7}][5]$ with $\text{Cy}_2\text{PCl}$ .....                                                                                                                                                               | 8  |
| 1.5 Reaction of $[\text{K}(\text{thf})_{0.7}][5]$ with ${}^t\text{Bu}_2\text{PCl}$ .....                                                                                                                                                           | 9  |
| 1.6 Reaction of $[\text{K}(\text{thf})_{0.8}][6]$ with $\text{Ph}_2\text{PCl}$ .....                                                                                                                                                               | 10 |
| 1.7 Reaction of $[\text{K}(\text{thf})_{0.8}][6]$ with $\text{Cy}_2\text{PCl}$ .....                                                                                                                                                               | 11 |
| 1.8 Reaction of $[\text{K}(\text{thf})_{0.8}][6]$ with ${}^t\text{Bu}_2\text{PCl}$ .....                                                                                                                                                           | 12 |
| 1.9 Synthesis of $[\text{Cp}^*\text{Co}(\eta^3\text{-P}_3\text{SiL})]$ ( $\text{L} = ({}^t\text{BuN})_2\text{CPh}$ ) (11) .....                                                                                                                    | 13 |
| 1.10 Synthesis of $[\text{Cp}^*\text{Co}(\eta^3\text{-As}_3\text{SiL})]$ ( $\text{L} = ({}^t\text{BuN})_2\text{CPh}$ ) (12) .....                                                                                                                  | 14 |
| 1.11 Synthesis of $[\text{Cp}^*\text{Co}(\eta^2:\eta^1\text{-As}_3\text{P}_2\text{Ph}_4)]$ [TEF] (13).....                                                                                                                                         | 15 |
| 2. NMR spectroscopic investigations .....                                                                                                                                                                                                          | 16 |
| 2.1 $[\text{K}(\text{thf})_{0.7}][\text{Cp}^*\text{Co}(\eta^3\text{-P}_3)]$ ( $[\text{K}(\text{thf})_{0.7}][5]$ ).....                                                                                                                             | 16 |
| 2.2 $[\text{K}(18\text{-c-6})][\text{Cp}^*\text{Co}(\eta^3\text{-P}_3)]$ ( $[\text{K}(18\text{-c-6})][5]$ ) .....                                                                                                                                  | 17 |
| 2.3 $[\text{K}(\text{thf})_{0.8}][\text{Cp}^*\text{Co}(\eta^3\text{-As}_3)]$ ( $[\text{K}(\text{thf})_{0.8}][6]$ ) .....                                                                                                                           | 18 |
| 2.4 $[\text{K}(18\text{-c-6})][\text{Cp}^*\text{Co}(\eta^3\text{-As}_3)]$ ( $[\text{K}(18\text{-c-6})][6]$ ) .....                                                                                                                                 | 19 |
| 2.5 $[\text{Cp}^*\text{Co}(\eta^3\text{-P}_4\text{Ph}_2)]$ (7a).....                                                                                                                                                                               | 20 |
| 2.6 Reaction of $[\text{K}(\text{thf})_{0.7}][\text{Cp}^*\text{Co}(\eta^3\text{-P}_3)]$ ( $[\text{K}(\text{thf})_{0.7}][5]$ ) with $\text{Ph}_2\text{PCl}$ .....                                                                                   | 21 |
| 2.7 $[\text{Cp}^*\text{Co}(\eta^3\text{-P}_4\text{Cy}_2)]$ (7b).....                                                                                                                                                                               | 22 |
| 2.8 Reaction of $[\text{K}(\text{thf})_{0.7}][\text{Cp}^*\text{Co}(\eta^3\text{-P}_3)]$ ( $[\text{K}(\text{thf})_{0.7}][5]$ ) with $\text{Cy}_2\text{PCl}$ .....                                                                                   | 24 |
| 2.9 $[\text{Cp}^*\text{Co}(\eta^3\text{-P}_4\text{tBu}_2)]$ (7c) .....                                                                                                                                                                             | 25 |

|                                                                                                                                                                                  |    |
|----------------------------------------------------------------------------------------------------------------------------------------------------------------------------------|----|
| 2.10 Reaction of $[\text{K}(\text{thf})_{0.7}][\text{Cp}^{\text{***}}\text{Co}(\eta^3\text{-P}_3)]$ ( $[\text{K}(\text{thf})_{0.7}][5]$ ) with ${}^t\text{Bu}_2\text{PCl}$ ..... | 28 |
| 2.11 $[\text{Cp}^{\text{***}}\text{Co}(\eta^2:\eta^1\text{-P}_4\text{Ph}_2)]$ (8a) .....                                                                                         | 29 |
| 2.12 $[\text{Cp}^{\text{***}}\text{Co}(\eta^2:\eta^1\text{-P}_4\text{Cy}_2)]$ (8b) .....                                                                                         | 31 |
| 2.13 $[\text{Cp}^{\text{***}}\text{Co}(\eta^2:\eta^1\text{-P}_4{}^t\text{Bu}_2)]$ (8c) .....                                                                                     | 33 |
| 2.14 Reaction of $[\text{K}(\text{thf})_{0.8}][\text{Cp}^{\text{***}}\text{Co}(\eta^3\text{-As}_3)]$ ( $[\text{K}(\text{thf})_{0.8}][6]$ ) with $\text{Ph}_2\text{PCl}$ .....    | 34 |
| 2.15 $[\text{Cp}^{\text{***}}\text{Co}(\eta^3\text{-As}_3\text{PCy}_2)]$ (9b) + $[\text{Cp}^{\text{***}}\text{Co}(\eta^2:\eta^1\text{-As}_3\text{PCy}_2)]$ (10b) .....           | 36 |
| 2.16 $[\text{Cp}^{\text{***}}\text{Co}(\eta^3\text{-As}_3\text{P}^t\text{Bu}_2)]$ (9c) .....                                                                                     | 39 |
| 2.17 $[\text{Cp}^{\text{***}}\text{Co}(\eta^3\text{-P}_3\text{SiL})]$ (L = $({}^t\text{BuN})_2\text{CPh}$ ) (11) .....                                                           | 42 |
| 2.18 $[\text{Cp}^{\text{***}}\text{Co}(\eta^3\text{-As}_3\text{SiL})]$ (L = $({}^t\text{BuN})_2\text{CPh}$ ) (12) .....                                                          | 44 |
| 2.19 $[\text{Cp}^{\text{***}}\text{Co}(\eta^2:\eta^1\text{-As}_3\text{P}_2\text{Ph}_4)]$ [TEF] (13) .....                                                                        | 45 |
| 3. Details on single crystal X-ray structure analysis .....                                                                                                                      | 48 |
| 3.1 $[\text{K}(18\text{-c-6})]\text{Cp}^{\text{***}}$ .....                                                                                                                      | 49 |
| 3.2 $[\text{K}(18\text{-c-6})][\text{Cp}^{\text{***}}\text{Co}(\eta^3\text{-P}_3)]$ ( $[\text{K}(18\text{-c-6})][5]$ ) .....                                                     | 50 |
| 3.3 $[\text{K}(18\text{-c-6})][\text{Cp}^{\text{***}}\text{Co}(\eta^3\text{-As}_3)]$ ( $[\text{K}(18\text{-c-6})][6]$ ) .....                                                    | 51 |
| 3.4 $[\text{Cp}^{\text{***}}\text{Co}(\eta^3\text{-P}_4\text{Cy}_2)]$ (7b) .....                                                                                                 | 52 |
| 3.5 $[\text{Cp}^{\text{***}}\text{Co}(\eta^3\text{-P}_4{}^t\text{Bu}_2)]$ (7c) .....                                                                                             | 53 |
| 3.6 $[\text{Cp}^{\text{***}}\text{Co}(\eta^2:\eta^1\text{-P}_4\text{Ph}_2)]$ (8a) .....                                                                                          | 54 |
| 3.7 $[\text{Cp}^{\text{***}}\text{Co}(\eta^3\text{-As}_3\text{PCy}_2)]$ (9b) .....                                                                                               | 55 |
| 3.8 $[\text{Cp}^{\text{***}}\text{Co}(\eta^3\text{-As}_3\text{P}^t\text{Bu}_2)]$ (9c) .....                                                                                      | 56 |
| 3.9 $[\text{Cp}^{\text{***}}\text{Co}(\eta^2:\eta^1\text{-As}_3\text{PPh}_2)]$ (10a) .....                                                                                       | 57 |
| 3.10 $[\text{Cp}^{\text{***}}\text{Co}(\eta^2:\eta^1\text{-As}_3\text{PCy}_2)]$ (10b) .....                                                                                      | 58 |
| 3.11 $[\text{Cp}^{\text{***}}\text{Co}(\eta^3\text{-P}_3\text{SiL})]$ (L = $({}^t\text{BuN})_2\text{CPh}$ ) (11) .....                                                           | 59 |
| 3.12 $[\text{Cp}^{\text{***}}\text{Co}(\eta^3\text{-As}_3\text{SiL})]$ (L = $({}^t\text{BuN})_2\text{CPh}$ ) (12) .....                                                          | 60 |
| 3.13 $[\text{Cp}^{\text{***}}\text{Co}(\eta^2:\eta^1\text{-As}_3\text{P}_2\text{Ph}_4)]$ [TEF] (13) .....                                                                        | 61 |
| 3.14 Crystallographic information .....                                                                                                                                          | 62 |
| 4. Computational Details .....                                                                                                                                                   | 66 |
| 4.1 Details for $\text{Cp}^{\text{***}}$ compounds .....                                                                                                                         | 66 |
| 4.2 Model system $[\text{Cp}^{\text{H}}\text{CoP}_3]^- + \text{PMe}_2^+$ .....                                                                                                   | 84 |
| 4.3 Model system $[\text{Cp}^{\text{H}}\text{CoAs}_3]^- + \text{PMe}_2^+$ .....                                                                                                  | 93 |
| 4.4 Model system $[\text{Cp}^{\text{H}}\text{CoP}_3]^- + \text{PR}_2^+$ .....                                                                                                    | 98 |

|                                                                                |     |
|--------------------------------------------------------------------------------|-----|
| 4.5 Model system $[\text{Cp}^{\text{H}}\text{CoAs}_3]^- + \text{PR}_2^+$ ..... | 109 |
| 5. References.....                                                             | 119 |

## 1. Synthetic procedures and experimental details

**Synthetic Procedures:** All manipulations were performed under an atmosphere of dry argon using standard glove-box and Schlenk techniques. All solvents were degassed and purified by standard procedures. The compounds  $[(Cp^*Co)(Cp^*Ni)(\mu,\eta^3:\eta^3-P_3)]$  (**3**),<sup>[1]</sup>  $[(Cp^*Co)(Cp^*Ni)(\mu,\eta^3:\eta^3-As_3)]$  (**4**),<sup>[2]</sup>  $[(tBuN)_2CPhSiCl]$ <sup>[3]</sup> and  $Ti[TEF]$ <sup>[4]</sup> were prepared according to literature procedures. K,  $Ph_2PCl$ ,  $tBu_2PCl$ ,  $Cy_2PCl$ , 18-c-6 were purchased commercially.

The NMR spectra were recorded with a Bruker Avance 400 spectrometer ( $^1H$ : 400.13 MHz,  $^{31}P$ : 161.976 MHz). The chemical shifts are given in ppm referenced to external  $SiMe_4$  ( $^1H$ ) and  $H_3PO_4$  ( $^{31}P$ ). Elemental analyses were determined with an Elementar Vario EL III apparatus. The X-Band EPR measurements were carried out with a MiniScope MS400 device with a frequency of 9.44 GHz and a rectangular resonator TE102 of the company Magnettech GmbH. The ESI-MS spectra were acquired on a ThermoQuest Finnigan MAT TSQ 7000 mass spectrometer. The LIFDI-MS spectra were recorded with a Finnigan MAT 95 mass spectrometer.

## 1.1 Synthesis of $[\text{K}(\text{thf})_{0.7}][\text{Cp}^*\text{Co}(\eta^3\text{-P}_3)]$ ( $[\text{K}(\text{thf})_{0.7}][\mathbf{5}]$ ) and $[\text{K}(\mathbf{18-c-6})][\text{Cp}^*\text{Co}(\eta^3\text{-P}_3)]$ ( $[\text{K}(\mathbf{18-c-6})][\mathbf{5}]$ )

Compound **3** (2 g, 2.95 mmol, 1 eq) and elemental potassium (352 mg, 9.00 mmol, 3.05 eq) were stirred together in thf for 2 days, while the color changed from brown to dark red/purple and a large amount of black precipitate was formed. The solution was filtered over diatomaceous earth and the solvent removed *in vacuo*. The obtained dark red solid contains a 1:0.8 mixture of  $\text{KCp}^*$  and  $[\text{K}(\text{thf})_{0.7}][\mathbf{5}]$  according to the  $^1\text{H}$  NMR spectrum in  $\text{thf-d}_8$  (cf. Figure S1) giving a sum formula of  $[\text{Cp}^*\text{CoP}_3\text{K}(\text{thf})_{0.7}]_{0.444}[\text{KCp}^*]_{0.556}$ .

Yield: 1.67 g (2.05 mmol  $[\text{K}(\text{thf})_{0.7}][\mathbf{5}]$  within the mixture, 69 %).

$^1\text{H}$  NMR ( $\text{thf-d}_8$ , 25 °C):  $\delta$  [ppm] = 5.47 (s, 2H,  $\text{C}_5\text{H}_2^t\text{Bu}_3$  ( $\text{KCp}^*$ )), 4.35 (s, 1.6H,  $\text{C}_5\text{H}_2^t\text{Bu}_3$  ( $[\text{K}(\text{thf})_{0.7}][\mathbf{5}]$ )), 3.53 (s, 2.3H, thf ( $\text{K}(\text{thf})_{0.7}$ )), 1.68 (s, 2.3H, thf ( $\text{K}(\text{thf})_{0.7}$ )), 1.30 (s, 18H,  $\text{C}_5\text{H}_2^t\text{Bu}_3$  ( $\text{KCp}^*$ )), 1.26 (s, 14.4H,  $\text{C}_5\text{H}_2^t\text{Bu}_3$  ( $[\text{K}(\text{thf})_{0.7}][\mathbf{5}]$ )), 1.14 (s, 9H,  $\text{C}_5\text{H}_2^t\text{Bu}_3$  ( $\text{KCp}^*$ )), 1.07 (s, 7.2H,  $\text{C}_5\text{H}_2^t\text{Bu}_3$  ( $[\text{K}(\text{thf})_{0.7}][\mathbf{5}]$ )).

$^{31}\text{P}\{^1\text{H}\}$  NMR ( $\text{thf-d}_8$ , 25 °C):  $\delta$  [ppm] = -313.1 (s,  $\text{P}_3$ ).

**18-c-6** (1.56 g, 5.9 mmol, 2 eq) in thf was added to the mixture above, stirred for 5 minutes and the solvent reduced *in vacuo*. The concentrated thf solution was layered with *n*-hexane at room temperature and after a few days, large crystals of  $[\text{K}(\mathbf{18-c-6})][\mathbf{5}]$  and  $[\text{K}(\mathbf{18-c-6})]\text{Cp}^*$  (cf. chapter 3.1) were obtained. The mother liquor was decanted off and the obtained crystals separated under the microscope yielding analytically pure  $[\text{K}(\mathbf{18-c-6})][\mathbf{5}]$ .

Yield: 468 mg (0.68 mmol, 23 %).

$^1\text{H}$  NMR ( $\text{thf-d}_8$ , 25 °C):  $\delta$  [ppm] = 4.36 (s, 2H,  $\text{C}_5\text{H}_2^t\text{Bu}_3$  ( $[\text{K}(\mathbf{18-c-6})][\mathbf{5}]$ )), 3.63 (s, 24H, **18-c-6**), 1.32 (s, 18H,  $\text{C}_5\text{H}_2^t\text{Bu}_3$  ( $[\text{K}(\mathbf{18-c-6})][\mathbf{5}]$ )), 1.13 (s, 9H,  $\text{C}_5\text{H}_2^t\text{Bu}_3$  ( $[\text{K}(\mathbf{18-c-6})][\mathbf{5}]$ )).

$^{31}\text{P}\{^1\text{H}\}$  NMR ( $\text{thf-d}_8$ , 25 °C):  $\delta$  [ppm] = -313.1 (s,  $\text{P}_3$ ).

**ESI-MS** (dme):  $m/z$  = 385.09 (100 %,  $[\text{M}]$ ).

**EA**  $\text{C}_{29}\text{H}_{53}\text{O}_6\text{KCoP}_3$ : calc [%]: C 50.58; H 7.76; found [%]: C 50.56; H 7.54.

## 1.2 Synthesis of $[\text{K}(\text{thf})_{0.8}][\text{Cp}^*\text{Co}(\eta^3\text{-As}_3)]$ ( $[\text{K}(\text{thf})_{0.7}][\mathbf{6}]$ ) and $[\text{K}(\mathbf{18-c-6})][\text{Cp}^*\text{Co}(\eta^3\text{-As}_3)]$ ( $[\text{K}(\mathbf{18-c-6})][\mathbf{6}]$ )

Compound **4** (2 g, 2.47 mmol, 1 eq) and elemental potassium (290 mg, 7.42 mmol, 3.00 eq) were stirred together in thf for 2 days, while the color changed from green to brown and then to green and a large amount of black precipitate was formed. The solution was filtered over diatomaceous earth and the solvent removed *in vacuo*. The obtained dark green solid contains a 1:0.7 mixture of  $\text{KCp}^*$  and  $[\text{K}(\text{thf})_{0.8}][\mathbf{6}]$  according to the  $^1\text{H}$  NMR spectrum in thf- $d_8$  (cf. Figure S4) giving a sum formula of  $[\text{Cp}^*\text{CoAs}_3\text{K}(\text{thf})_{0.8}]_{0.412}[\text{KCp}^*]_{0.588}$ .

Yield: 1.57 g (1.56 mmol  $[\text{K}(\text{thf})_{0.8}][\mathbf{6}]$  within the mixture, 63 %).

$^1\text{H}$  NMR (thf- $d_8$ , 25 °C):  $\delta$  [ppm] = 5.46 (s, 2H,  $\text{C}_5\text{H}_2^t\text{Bu}_3$  ( $\text{KCp}^*$ )), 4.40 (s, 1.4H,  $\text{C}_5\text{H}_2^t\text{Bu}_3$  ( $[\text{K}(\text{thf})_{0.8}][\mathbf{6}]$ )), 3.53 (s, 2.3H, thf ( $\text{K}(\text{thf})_{0.8}$ )), 1.67 (s, 2.3H, thf ( $\text{K}(\text{thf})_{0.7}$ )), 1.29 (s, 18H,  $\text{C}_5\text{H}_2^t\text{Bu}_3$  ( $\text{KCp}^*$ )), 1.25 (s, 12.6H,  $\text{C}_5\text{H}_2^t\text{Bu}_3$  ( $[\text{K}(\text{thf})_{0.8}][\mathbf{6}]$ )), 1.14 (s, 9H,  $\text{C}_5\text{H}_2^t\text{Bu}_3$  ( $\text{KCp}^*$ )), 1.07 (s, 7.2H,  $\text{C}_5\text{H}_2^t\text{Bu}_3$  ( $[\text{K}(\text{thf})_{0.8}][\mathbf{6}]$ )).

**18-c-6** (1.46 g, 5.54 mmol, 2 eq) in thf was added to the mixture above, stirred for 5 minutes and the solvent reduces *in vacuo*. The concentrated thf solution was layered with *n*-hexane at room temperature and after a few days, large crystals of  $[\text{K}(\mathbf{18-c-6})][\mathbf{6}]$  and  $[\text{K}(\mathbf{18-c-6})]\text{Cp}^*$  (cf. chapter 3.1) were obtained. The mother liquor was decanted off and the obtained crystals separated under the microscope yielding analytically pure  $[\text{K}(\mathbf{18-c-6})][\mathbf{6}]$ .

Yield: 300 mg (0.37 mmol, 15 %).

$^1\text{H}$  NMR (thf- $d_8$ , 25 °C):  $\delta$  [ppm] = 4.41 (s, 2H,  $\text{C}_5\text{H}_2^t\text{Bu}_3$  ( $[\text{K}(\mathbf{18-c-6})][\mathbf{6}]$ )), 3.62 (s, 24H, **18-c-6**), 1.31 (s, 18H,  $\text{C}_5\text{H}_2^t\text{Bu}_3$  ( $[\text{K}(\mathbf{18-c-6})][\mathbf{6}]$ )), 1.13 (s, 9H,  $\text{C}_5\text{H}_2^t\text{Bu}_3$  ( $[\text{K}(\mathbf{18-c-6})][\mathbf{6}]$ )).

**ESI-MS** (dme):  $m/z$  = 516.92 (100 %, [M]).

**EA**  $\text{C}_{29}\text{H}_{53}\text{O}_6\text{KCoAs}_3 \times \text{C}_4\text{H}_8\text{O}$ : calc [%]: C 44.40; H 6.89; found [%]: C 44.38; H 6.59.

### 1.3 Reaction of [K(thf)<sub>0.7</sub>][5] with Ph<sub>2</sub>PCI

A mixture of KCp<sup>'''</sup> and [K(thf)<sub>0.7</sub>][5] (300 mg, 0.368 mmol, 1 eq) in thf was cooled to -80 °C and Ph<sub>2</sub>PCI in toluene (1.56 ml, 0.39 mmol, 0.25 mol/L, 1.06 eq) was added, while the color changed from dark red to brown. The mixture was allowed to reach room temperature and the solvent was removed *in vacuo*. The residue was extracted with *n*-pentane.

and filtered over diatomaceous earth. The solvent was removed *in vacuo* and NMR spectra in toluene-d<sub>8</sub> were recorded. The <sup>31</sup>P{<sup>1</sup>H} NMR spectrum reveals the formation of [Cp<sup>'''</sup>Co(η<sup>3</sup>-P<sub>4</sub>Ph<sub>2</sub>)] (**7a**) and [Cp<sup>'''</sup>Co(η<sup>2</sup>:η<sup>1</sup>-P<sub>4</sub>Ph<sub>2</sub>)] (**8a**) in a ratio of 1:0.2 beside minor amounts of Ph<sub>3</sub>P, (Ph<sub>2</sub>P)<sub>2</sub> and (PhP)<sub>5</sub>. The residue was dissolved in toluene and layered with MeCN. After storage at -30 °C for three weeks, **8a** can be obtained in form of red plates. The supernatant was decanted off and the obtained crystals dried *in vacuo*.

Compound **7a**:

<sup>1</sup>H NMR (C<sub>6</sub>D<sub>6</sub>, 25 °C): δ [ppm] = 7.82 (m, 2H, P<sub>4</sub>Ph<sub>2</sub>), 7.32 (m, 2H, P<sub>4</sub>Ph<sub>2</sub>), 6.99 (m, 6H, P<sub>4</sub>Ph<sub>2</sub>), 5.17 (s, 2H, C<sub>5</sub>H<sub>2</sub><sup>t</sup>Bu<sub>3</sub>), 1.39 (s, 18H, C<sub>5</sub>H<sub>2</sub><sup>t</sup>Bu<sub>3</sub>), 1.28 (s, 9H, C<sub>5</sub>H<sub>2</sub><sup>t</sup>Bu<sub>3</sub>).

<sup>31</sup>P{<sup>1</sup>H} NMR (C<sub>6</sub>D<sub>6</sub>, 25 °C): δ [ppm] = 32.1 (m, 1P, P<sub>A</sub>, P<sub>4</sub>Ph<sub>2</sub>), -8.2 (m, 2P, P<sub>M</sub>/P<sub>M'</sub>, P<sub>4</sub>Ph<sub>2</sub>), -80.7 (m, 1P, P<sub>X</sub>, P<sub>4</sub>Ph<sub>2</sub>). Coupling constants are obtained from the simulation (cf. Figure S6 and Table S1).

<sup>31</sup>P NMR (C<sub>6</sub>D<sub>6</sub>, 25 °C): δ [ppm] = 32.1 (m, 1P, P<sub>A</sub>, P<sub>4</sub>Ph<sub>2</sub>), -8.2 (m, 2P, P<sub>M</sub>/P<sub>M'</sub>, P<sub>4</sub>Ph<sub>2</sub>), -80.7 (m, 1P, P<sub>X</sub>, P<sub>4</sub>Ph<sub>2</sub>).

Compound **8a**:

Yield: 86 mg (0.151 mmol, 41 %)

<sup>1</sup>H NMR (C<sub>6</sub>D<sub>6</sub>, 25 °C): δ [ppm] = 7.92 (m, 4H, P<sub>4</sub>Ph<sub>2</sub>), 7.07 (m, 6H, P<sub>4</sub>Ph<sub>2</sub>), 4.19 (s, 2H, C<sub>5</sub>H<sub>2</sub><sup>t</sup>Bu<sub>3</sub>), 1.37 (s, 9H, C<sub>5</sub>H<sub>2</sub><sup>t</sup>Bu<sub>3</sub>), 1.34 (s, 18H, C<sub>5</sub>H<sub>2</sub><sup>t</sup>Bu<sub>3</sub>).

<sup>31</sup>P{<sup>1</sup>H} NMR (C<sub>6</sub>D<sub>6</sub>, 25 °C): δ [ppm] = -34.1 (m, 1P, P<sub>A</sub>, P<sub>4</sub>Ph<sub>2</sub>), -73.1 (m, 1P, P<sub>M</sub>, P<sub>4</sub>Ph<sub>2</sub>), -192.6 (m, 2P, P<sub>X</sub>/P<sub>X'</sub>, P<sub>4</sub>Ph<sub>2</sub>). Coupling constants are obtained from the simulation (cf. Figure S19 and Table S5).

<sup>31</sup>P NMR (C<sub>6</sub>D<sub>6</sub>, 25 °C): δ [ppm] = -34.1 (m, 1P, P<sub>A</sub>, P<sub>4</sub>Ph<sub>2</sub>), -73.1 (m, 1P, P<sub>M</sub>, P<sub>4</sub>Ph<sub>2</sub>), -192.6 (m, 2P, P<sub>X</sub>/P<sub>X'</sub>, P<sub>4</sub>Ph<sub>2</sub>).

LIFDI-MS (toluene): *m/z* = 570.13 (100 %, [M]<sup>+</sup>).

EA C<sub>29</sub>H<sub>39</sub>CoP<sub>4</sub>: calc [%]: C 61.06; H 6.89; found [%]: C 61.25; H 6.77.



## 1.4 Reaction of [K(thf)<sub>0.7</sub>][5] with Cy<sub>2</sub>PCI

A mixture of KCp<sup>'''</sup> and [K(thf)<sub>0.7</sub>][5] (500 mg, 0.61 mmol, 1 eq) in thf was cooled to -80 °C and Cy<sub>2</sub>PCI in toluene (1.33 ml, 0.8 mmol, 0.6 mol/L, 1.31 eq) was added, while the color changed from dark red to brown. The mixture was allowed to reach room temperature and the solvent was removed *in vacuo*. The residue was extracted with *n*-pentane and filtered over diatomaceous earth. The solvent was removed *in vacuo* and NMR spectra in toluene-d<sub>8</sub> were recorded. The <sup>31</sup>P{<sup>1</sup>H} NMR spectrum reveals the formation of [Cp<sup>'''</sup>Co(η<sup>3</sup>-P<sub>4</sub>Cy<sub>2</sub>)] (**7b**) and [Cp<sup>'''</sup>Co(η<sup>2</sup>:η<sup>1</sup>-P<sub>4</sub>Cy<sub>2</sub>)] (**8b**) in a ratio of 1:0.01 beside unused Cy<sub>2</sub>PCI. The crude mixture was purified by column chromatography (SiO<sub>2</sub>, *n*-hexane, 16 x 3.5 cm). Using *n*-hexane, a weak red fraction of **8b** followed by a strong purple fraction of **7b** was collected. The solvent was removed *in vacuo*. Since **8b** was obtained in a very small amount only NMR spectroscopic investigations were performed. Compound **7b** was dissolved in toluene, layered with MeCN and stored at -30 °C. After a few days, **7b** can be obtained as red blocks. The supernatant was decanted off and the obtained crystals dried *in vacuo*.

Compound **7b**:

Yield: 35 mg (0.06 mmol, 10 %)

<sup>1</sup>H NMR (C<sub>6</sub>D<sub>6</sub>, 25 °C): δ [ppm] = 5.16 (s, 2H, C<sub>5</sub>H<sub>2</sub><sup>t</sup>Bu<sub>3</sub>), 2.67 (m, 1H, P<sub>4</sub>Cy<sub>2</sub>), 2.01 (m, 2H, P<sub>4</sub>Cy<sub>2</sub>), 1.88 (m, 2H, P<sub>4</sub>Cy<sub>2</sub>), 1.61 (m, 8H, P<sub>4</sub>Cy<sub>2</sub>), 1.52 (s, 18H, C<sub>5</sub>H<sub>2</sub><sup>t</sup>Bu<sub>3</sub>), 1.43 (s, 9H, C<sub>5</sub>H<sub>2</sub><sup>t</sup>Bu<sub>3</sub>), 0.96 (m, 9H, P<sub>4</sub>Cy<sub>2</sub>).

<sup>31</sup>P{<sup>1</sup>H} NMR (C<sub>6</sub>D<sub>6</sub>, 25 °C): δ [ppm] = 62.7 (m, 1P, P<sub>A</sub>, P<sub>4</sub>Cy<sub>2</sub>), -36.1 (m, 2P, P<sub>M</sub>/P<sub>M'</sub>, P<sub>4</sub>Cy<sub>2</sub>), -71.3 (m, 1P, P<sub>X</sub>, P<sub>4</sub>Cy<sub>2</sub>). Coupling constants are obtained from the simulation (cf. Figure S10 and Table S2).

<sup>31</sup>P NMR (C<sub>6</sub>D<sub>6</sub>, 25 °C): δ [ppm] = 62.7 (m, 1P, P<sub>A</sub>, P<sub>4</sub>Cy<sub>2</sub>), -36.1 (m, 2P, P<sub>M</sub>/P<sub>M'</sub>, P<sub>4</sub>Cy<sub>2</sub>), -71.3 (m, 1P, P<sub>X</sub>, P<sub>4</sub>Cy<sub>2</sub>).

LIFDI-MS (toluene): *m/z* = 582.23 (100 %, [M]<sup>+</sup>).

EA C<sub>29</sub>H<sub>51</sub>CoP<sub>4</sub> · (toluene)<sub>0.1</sub>: calc [%]: C 60.28; H 8.83; found [%]: C 60.48; H 8.78.

Compound **8b**:

<sup>1</sup>H NMR (C<sub>6</sub>D<sub>6</sub>, 25 °C): δ [ppm] = 4.08 (s, 2H, C<sub>5</sub>H<sub>2</sub><sup>t</sup>Bu<sub>3</sub>), 2.56 (m, 2H, P<sub>4</sub>Cy<sub>2</sub>), 1.90 (m, 2H, P<sub>4</sub>Cy<sub>2</sub>), 1.81 (m, 2H, P<sub>4</sub>Cy<sub>2</sub>), 1.63 (m, 9H, P<sub>4</sub>Cy<sub>2</sub>), 1.49 (s, 18H, C<sub>5</sub>H<sub>2</sub><sup>t</sup>Bu<sub>3</sub>), 1.42 (s, 9H, C<sub>5</sub>H<sub>2</sub><sup>t</sup>Bu<sub>3</sub>), 1.14 (m, 7H, P<sub>4</sub>Cy<sub>2</sub>).

<sup>31</sup>P{<sup>1</sup>H} NMR (C<sub>6</sub>D<sub>6</sub>, 25 °C): δ [ppm] = -52.9 (m, 1P, P<sub>A</sub>, P<sub>4</sub>Cy<sub>2</sub>), -83.5 (m, 1P, P<sub>M</sub>, P<sub>4</sub>Cy<sub>2</sub>), -199.1 (m, 2P, P<sub>X</sub>/P<sub>X'</sub>, P<sub>4</sub>Cy<sub>2</sub>). Coupling constants are obtained from the simulation (cf. Figure S21 and Table S6).

**<sup>31</sup>P NMR** (C<sub>6</sub>D<sub>6</sub>, 25 °C): δ [ppm] = -52.9 (m, 1P, P<sub>A</sub>, P<sub>4</sub>Cy<sub>2</sub>), -83.5 (m, 1P, P<sub>M</sub>, P<sub>4</sub>Cy<sub>2</sub>), -199.1 (m, 2P, P<sub>X</sub>/P<sub>X'</sub>, P<sub>4</sub>Cy<sub>2</sub>).

### 1.5 Reaction of [K(thf)<sub>0.7</sub>][5] with <sup>t</sup>Bu<sub>2</sub>PCl

A mixture of KCp<sup>'''</sup> and [K(thf)<sub>0.7</sub>][5] (320 mg, 0.39 mmol, 1 eq) in thf was cooled to -80 °C and <sup>t</sup>Bu<sub>2</sub>PCl in toluene (4.5 ml, 0.5 mmol, 0.112 mol/L, 1.28 eq) was added, while the color changed from dark red to brown. The mixture was allowed to reach room temperature and the solvent was removed *in vacuo*. The residue was extracted with *n*-pentane and filtered over diatomaceous earth. The solvent was removed *in vacuo* and NMR spectra in toluene-d<sub>8</sub> were recorded. The <sup>31</sup>P{<sup>1</sup>H} NMR spectrum reveals the formation of [Cp<sup>'''</sup>Co(η<sup>3</sup>-P<sub>4</sub><sup>t</sup>Bu<sub>2</sub>)] (**7c**) and [Cp<sup>'''</sup>Co(η<sup>2</sup>:η<sup>1</sup>-P<sub>4</sub><sup>t</sup>Bu<sub>2</sub>)] (**8c**) in a ratio of 1:0.01 beside unused <sup>t</sup>Bu<sub>2</sub>PCl. The crude mixture was purified by column chromatography (SiO<sub>2</sub>, *n*-hexane, 15 x 3.5 cm). Using a 1:1 mixture of *n*-hexane and toluene, a strong brown-green fraction of **7c** could be eluted. The solvent was removed *in vacuo*. The residue was dissolved in CH<sub>2</sub>Cl<sub>2</sub>, layered with MeCN and stored at r.t.. After a few days, **7c** can be obtained as red blocks. The supernatant was decanted off and the obtained crystals dried *in vacuo*.

Compound **7c**:

Yield: 8 mg (0.02 mmol, 4 %).

**<sup>1</sup>H NMR** (C<sub>6</sub>D<sub>6</sub>, 25 °C): δ [ppm] = 5.05 (s, 2H, C<sub>5</sub>H<sub>2</sub><sup>t</sup>Bu<sub>3</sub>), 1.54 (s, 18H, C<sub>5</sub>H<sub>2</sub><sup>t</sup>Bu<sub>3</sub>), 1.38 (s, 9H, C<sub>5</sub>H<sub>2</sub><sup>t</sup>Bu<sub>3</sub>), 1.30 (d, 9H, <sup>3</sup>J<sub>PH</sub> = 13 Hz, P<sub>4</sub><sup>t</sup>Bu<sub>2</sub>), 1.23 (d, 9H, <sup>3</sup>J<sub>PH</sub> = 13 Hz, P<sub>4</sub><sup>t</sup>Bu<sub>2</sub>).

**<sup>31</sup>P{<sup>1</sup>H} NMR** (C<sub>6</sub>D<sub>6</sub>, 25 °C): δ [ppm] = 89.5 (m, 1P, P<sub>A</sub>, P<sub>4</sub><sup>t</sup>Bu<sub>2</sub>), -30.9 (m, 2P, P<sub>M</sub>/P<sub>M'</sub>, P<sub>4</sub><sup>t</sup>Bu<sub>2</sub>), -61.4 (m, 1P, P<sub>X</sub>, P<sub>4</sub><sup>t</sup>Bu<sub>2</sub>). Coupling constants are obtained from the simulation (cf. Figure S14 and Table S3).

**<sup>31</sup>P NMR** (C<sub>6</sub>D<sub>6</sub>, 25 °C): δ [ppm] = 89.5 (m, 1P, P<sub>A</sub>, P<sub>4</sub><sup>t</sup>Bu<sub>2</sub>), -30.9 (m, 2P, P<sub>M</sub>/P<sub>M'</sub>, P<sub>4</sub><sup>t</sup>Bu<sub>2</sub>), -61.4 (m, 1P, P<sub>X</sub>, P<sub>4</sub><sup>t</sup>Bu<sub>2</sub>). Coupling constants are obtained from the simulation (cf. Figure S15 and Table S4).

**LIFDI-MS** (toluene): *m/z* = 530.20 (100 %, [M]<sup>+</sup>).

**EA** C<sub>25</sub>H<sub>47</sub>CoP<sub>4</sub>: calc [%]: C 56.60; H 8.93; found [%]: C 56.62; H 8.82.

Compound **8c**:

**<sup>31</sup>P{<sup>1</sup>H} NMR** (toluene-d<sub>8</sub>, 25 °C): δ [ppm] = -56.2 (m, 1P, P<sub>A</sub>, P<sub>4</sub><sup>t</sup>Bu<sub>2</sub>), -80.8 (m, 2P, P<sub>M</sub>, P<sub>4</sub><sup>t</sup>Bu<sub>2</sub>), -197.8 (m, 2P, P<sub>X</sub>, P<sub>X'</sub>, P<sub>4</sub><sup>t</sup>Bu<sub>2</sub>). Coupling constants are obtained from the simulation (cf. Figure S22 and Table S7).

## 1.6 Reaction of [K(thf)<sub>0.8</sub>][6] with Ph<sub>2</sub>PCI

A mixture of KCp<sup>'''</sup> and [K(thf)<sub>0.8</sub>][6] (650 mg, 0.65 mmol, 1 eq) was dissolved in thf and Ph<sub>2</sub>PCI in toluene (2.6 ml, 0.65 mmol, 0.25 mol/L, 1 eq) was added at -80 °C, while the color changed from dark green to red-brown. The solvent was removed *in vacuo*. The residue was extracted with *n*-pentane and filtered over diatomaceous earth. The solvent was removed *in vacuo* and NMR spectra in toluene-d<sub>8</sub> were recorded. The <sup>31</sup>P{<sup>1</sup>H} NMR spectrum reveals the formation of [Cp<sup>'''</sup>Co(η<sup>3</sup>-As<sub>3</sub>PPh<sub>2</sub>)] (**9a**), [Cp<sup>'''</sup>Co(η<sup>2</sup>:η<sup>1</sup>-As<sub>3</sub>PPh<sub>2</sub>)] (**10a**) and Ph<sub>4</sub>P<sub>2</sub> in a ratio of 1:3.45:0.67 beside PPh<sub>3</sub> and other unidentified side products. The <sup>1</sup>H NMR spectrum reveals additionally the formation of [(Cp<sup>'''</sup>Co)<sub>2</sub>(μ,η<sup>2</sup>:η<sup>2</sup>-As<sub>2</sub>)<sub>2</sub>]. The crude mixture was purified by column chromatography (SiO<sub>2</sub>, *n*-hexane, 15 x 4 cm). Using *n*-hexane, a first green fraction of [(Cp<sup>'''</sup>Co)<sub>2</sub>(μ,η<sup>2</sup>:η<sup>2</sup>-As<sub>2</sub>)<sub>2</sub>] was eluted and disposed, followed by a red-brown fraction of **10a** which was collected. The solvent was removed *in vacuo*. Compound **10a** was dissolved in toluene and layered with MeCN at room temperature and stored at -30 °C. After a few days, **10a** can be obtained as dark brown blocks. The supernatant was decanted off and the obtained crystals dried *in vacuo*.

### Compound **9a**

<sup>31</sup>P{<sup>1</sup>H} NMR (C<sub>6</sub>D<sub>6</sub>, 25 °C): δ [ppm] = -28.5 (s, As<sub>3</sub>PPh<sub>2</sub>).

<sup>31</sup>P NMR (C<sub>6</sub>D<sub>6</sub>, 25 °C): δ [ppm] = -28.5 (s, As<sub>3</sub>PPh<sub>2</sub>).

### Compound **10a**

Yield: 202 mg (0.288 mmol, 44 %).

<sup>1</sup>H NMR (C<sub>6</sub>D<sub>6</sub>, 25 °C): δ [ppm] = 7.94 (m, 4H, As<sub>3</sub>PPh<sub>2</sub>), 7.06 (m, 6H, As<sub>3</sub>PPh<sub>2</sub>) 4.02 (s, 2H, C<sub>5</sub>H<sub>2</sub><sup>t</sup>Bu<sub>3</sub>), 1.34 (s, 9H, C<sub>5</sub>H<sub>2</sub><sup>t</sup>Bu<sub>3</sub>), 1.32 (s, 18H, C<sub>5</sub>H<sub>2</sub><sup>t</sup>Bu<sub>3</sub>).

<sup>31</sup>P{<sup>1</sup>H} NMR (C<sub>6</sub>D<sub>6</sub>, 25 °C): δ [ppm] = -90.4 (s, As<sub>3</sub>PPh<sub>2</sub>).

<sup>31</sup>P NMR (C<sub>6</sub>D<sub>6</sub>, 25 °C): δ [ppm] = -90.4 (s, As<sub>3</sub>PPh<sub>2</sub>).

LIFDI-MS (toluene): *m/z* = 1403.92, (0.5 %, [M]<sup>2+</sup>), 702.01 (100 %, [M]<sup>+</sup>).

EA C<sub>29</sub>H<sub>39</sub>CoAs<sub>3</sub>P: calc [%]: C 49.60; H 6.60; found [%]: C 50.26; H 5.53.

## 1.7 Reaction of $[K(thf)_{0.8}][6]$ with $Cy_2PCI$

A mixture of  $KCp^{***}$  and  $[K(thf)_{0.8}][6]$  (500 mg, 0.50 mmol, 1 eq) in thf was cooled to  $-80\text{ }^\circ\text{C}$  and  $Cy_2PCI$  in toluene (1.16 ml, 0.7 mmol, 0.6 mol/L, 1.40 eq) was added, while the color changed from dark green to red-brown. The mixture was allowed to reach room temperature and the solvent was removed *in vacuo*. The residue was extracted with *n*-pentane and filtered over diatomaceous earth. The solvent was removed *in vacuo* and NMR spectra in toluene- $d_8$  were recorded. The  $^{31}P\{^1H\}$  NMR spectrum reveals the formation of  $[Cp^{***}Co(\eta^3\text{-}As_3PCy_2)]$  (**9a**) and  $[Cp^{***}Co(\eta^2:\eta^1\text{-}As_3PCy_2)]$  (**10b**) in a ratio of 1:0.11 beside unused  $Cy_2PCI$ . The crude mixture was purified by column chromatography ( $SiO_2$ , *n*-hexane, 16 x 3.5 cm). Using *n*-hexane, a red fraction of **10b** followed by a brown fraction of **9b** was collected. The solvent was removed *in vacuo*. The first red fraction contains a 1:3 mixture of **9b** and **10b**, while the second brown one contains clean **9b**. Compound **9b** was dissolved in *o*-difluorobenzene and layered with MeCN at room temperature, the mixture of **9b** and **10b** was dissolved in toluene, layered with MeCN and stored at  $-30\text{ }^\circ\text{C}$ . After a few days, **9b** can be obtained as dark brown blocks and **10b** as bright red needles. The supernatant was decanted off and the obtained crystals dried *in vacuo*.

Compound **9b**:

Yield: 25 mg (0.035 mmol, 7 %).

$^1H$  NMR ( $C_6D_6$ ,  $25\text{ }^\circ\text{C}$ ):  $\delta$  [ppm] = 5.10 (s, 2H,  $C_5H_2^tBu_3$ ), 2.27 (m, 1H,  $P_4Cy_2$ ), 1.86 (m, 4H,  $P_4Cy_2$ ), 1.62 (m, 7H,  $P_4Cy_2$ ), 1.47 (s, 18H,  $C_5H_2^tBu_3$ ), 1.47 (s, 9H,  $C_5H_2^tBu_3$ ), 1.27 (m, 2H,  $P_4Cy_2$ ), 0.98 (m, 8H,  $P_4Cy_2$ ).

$^{31}P$  NMR ( $C_6D_6$ ,  $25\text{ }^\circ\text{C}$ ):  $\delta$  [ppm] = 13.0 (s,  $As_3PCy_2$ ).

LIFDI-MS (toluene):  $m/z$  = 883.97 (20 %,  $[(Cp^{***}Co)_2(As_2)_2]^+$ ), 714.06 (100 %,  $[M]^+$ ).

EA  $C_{29}H_{51}CoAs_3P$ : calc [%]: C 48.76; H 7.20; found [%]: C 48.96; H 6.85.

Compound **10b**:

Yield: 45 mg (0.063 mmol mixture **9b** and **10b** 1:3, 12 %).

$^1H$  NMR ( $C_6D_6$ ,  $25\text{ }^\circ\text{C}$ ):  $\delta$  [ppm] = 3.96 (s, 2H,  $C_5H_2^tBu_3$ ), 2.57 (m, 2H,  $P_4Cy_2$ ), 1.86 (m, 4H,  $P_4Cy_2$ ), 1.62 (m, 8H,  $P_4Cy_2$ ), 1.48 (s, 18H,  $C_5H_2^tBu_3$ ), 1.43 (s, 9H,  $C_5H_2^tBu_3$ ), 1.32 (m, 1H,  $P_4Cy_2$ ), 1.16 (m, 7H,  $P_4Cy_2$ ).

$^{31}P$  NMR ( $C_6D_6$ ,  $25\text{ }^\circ\text{C}$ ):  $\delta$  [ppm] = -61.7 (s,  $As_3PCy_2$ ).

## 1.8 Reaction of [K(thf)<sub>0.8</sub>][6] with <sup>t</sup>Bu<sub>2</sub>PCl

A mixture of KCp<sup>'''</sup> and [K(thf)<sub>0.8</sub>][6] (470 mg, 0.469 mmol, 1 eq) in thf was cooled to -80 °C and <sup>t</sup>Bu<sub>2</sub>PCl in toluene (5.4 ml, 0.6 mmol, 0.112 mol/L, 1.28 eq) was added, while the color changed from dark green to brown. The mixture was allowed to reach room temperature and the solvent was removed *in vacuo*. The residue was extracted with *n*-pentane and filtered over diatomaceous earth. The solvent was removed *in vacuo* and NMR spectra in toluene-d<sub>8</sub> were recorded. The <sup>31</sup>P{<sup>1</sup>H} NMR spectrum reveals the clean formation of [Cp<sup>'''</sup>Co(η<sup>3</sup>-As<sub>3</sub>P<sup>t</sup>Bu<sub>2</sub>)] (**9c**) beside unused <sup>t</sup>Bu<sub>2</sub>PCl. The crude mixture was purified by column chromatography (SiO<sub>2</sub>, *n*-hexane, 17 x 3.5 cm). Using *n*-hexane, a strong brown-green fraction of **9c** could be eluted. The solvent was removed *in vacuo*. The residue was dissolved in CH<sub>2</sub>Cl<sub>2</sub>, layered with MeCN and stored at r.t.. After a few days, **9c** can be obtained as brown blocks. The supernatant was decanted off and the obtained crystals dried *in vacuo*.

Yield: 20 mg (0.03 mmol, 6 %).

<sup>1</sup>H NMR (C<sub>6</sub>D<sub>6</sub>, 25 °C): δ [ppm] = 4.99 (s, 2H, C<sub>5</sub>H<sub>2</sub><sup>t</sup>Bu<sub>3</sub>), 1.54 (s, 18H, C<sub>5</sub>H<sub>2</sub><sup>t</sup>Bu<sub>3</sub>), 1.37 (s, 9H, C<sub>5</sub>H<sub>2</sub><sup>t</sup>Bu<sub>3</sub>), 1.29 (d, 9H, <sup>3</sup>J<sub>PH</sub> = 13 Hz, P<sub>4</sub><sup>t</sup>Bu<sub>2</sub>), 1.16 (d, 9H, <sup>3</sup>J<sub>PH</sub> = 13 Hz, P<sub>4</sub><sup>t</sup>Bu<sub>2</sub>).

<sup>31</sup>P{<sup>1</sup>H} NMR (C<sub>6</sub>D<sub>6</sub>, 25 °C): δ [ppm] = 37.1 (s, As<sub>3</sub>P<sup>t</sup>Bu<sub>2</sub>).

<sup>31</sup>P NMR (C<sub>6</sub>D<sub>6</sub>, 25 °C): δ [ppm] = 37.1 (m, <sup>3</sup>J<sub>PH</sub> = 13 Hz, As<sub>3</sub>P<sup>t</sup>Bu<sub>2</sub>).

LIFDI-MS (toluene): *m/z* = 883.97 (100 %, [(Cp<sup>'''</sup>Co)<sub>2</sub>(As<sub>2</sub>)<sub>2</sub><sup>+</sup>], 662.03 (10 %, [M]<sup>+</sup>).

EA C<sub>25</sub>H<sub>47</sub>CoAs<sub>3</sub>P: calc [%]: C 45.34; H 7.15; found [%]: C 45.59; H 6.89.

## 1.9 Synthesis of [Cp<sup>'''</sup>Co(η<sup>3</sup>-P<sub>3</sub>SiL)] (L = (tBuN)<sub>2</sub>CPh) (11)

A mixture of KCp<sup>'''</sup> and [K(thf)<sub>0.7</sub>][5] (200 mg, 0.245 mmol, 1 eq) in thf was cooled to -80 °C and (tBuN)<sub>2</sub>CPhSiCl (72 mg, 0.245 mmol, 1 eq) was added, while no change of the color was observed. The mixture was allowed to reach room temperature, while the color changed from dark red to brown-green. The solvent was removed *in vacuo*. The residue was extracted with toluene and filtered over diatomaceous earth. The solvent was removed *in vacuo*, the residue dissolved in *o*-difluorobenzene, layered with *n*-pentane and stored at -30 °C. After a few days, **11** can be obtained as bright green blocks. The supernatant was decanted off and the obtained crystals dried *in vacuo*.

Yield: 45 mg (0.07 mmol, 29 %).

<sup>1</sup>H NMR (thf-d<sub>8</sub>, 25 °C): δ [ppm] = 7.54 (m, 5H, (tBuN)<sub>2</sub>CPhSiP<sub>3</sub>), 4.89 (s, 2H, C<sub>5</sub>H<sub>2</sub><sup>t</sup>Bu<sub>3</sub>), 1.45 (s, 18H, C<sub>5</sub>H<sub>2</sub><sup>t</sup>Bu<sub>3</sub>), 1.31 (s, 9H, C<sub>5</sub>H<sub>2</sub><sup>t</sup>Bu<sub>3</sub>), 1.29 (s, 5H, (tBuN)<sub>2</sub>CPhSiP<sub>3</sub>), 1.26 (s, 5H, (tBuN)<sub>2</sub>CPhSiP<sub>3</sub>).

<sup>31</sup>P{<sup>1</sup>H} NMR (thf-d<sub>8</sub>, 25 °C): δ [ppm] = -66.6 (dd, 1P, <sup>1</sup>J<sub>PP</sub> = 217 Hz, <sup>1</sup>J<sub>PP</sub> = 262 Hz, (tBuN)<sub>2</sub>CPhSiP<sub>3</sub>), -75.0 (d, 1P, <sup>1</sup>J<sub>PP</sub> = 217 Hz, <sup>1</sup>J<sub>PSi</sub> = 109 Hz, (tBuN)<sub>2</sub>CPhSiP<sub>3</sub>), -75.0 (d, 1P, <sup>1</sup>J<sub>PP</sub> = 262 Hz, <sup>1</sup>J<sub>PSi</sub> = 109 Hz, (tBuN)<sub>2</sub>CPhSiP<sub>3</sub>).

<sup>31</sup>P NMR (thf-d<sub>8</sub>, 25 °C): δ [ppm] = -66.6 (dd, 1P, <sup>1</sup>J<sub>PP</sub> = 217 Hz, <sup>1</sup>J<sub>PP</sub> = 262 Hz, (tBuN)<sub>2</sub>CPhSiP<sub>3</sub>), -75.0 (d, 1P, <sup>1</sup>J<sub>PP</sub> = 217 Hz, <sup>1</sup>J<sub>PSi</sub> = 109 Hz, (tBuN)<sub>2</sub>CPhSiP<sub>3</sub>), -75.0 (d, 1P, <sup>1</sup>J<sub>PP</sub> = 262 Hz, <sup>1</sup>J<sub>PSi</sub> = 109 Hz, (tBuN)<sub>2</sub>CPhSiP<sub>3</sub>).

<sup>29</sup>Si{<sup>1</sup>H} NMR (thf-d<sub>8</sub>, 25 °C): δ [ppm] = -24.62 (dt, <sup>1</sup>J<sub>PSi</sub> = 109 Hz, <sup>2</sup>J<sub>PSi</sub> = 12 Hz, (tBuN)<sub>2</sub>CPhSiP<sub>3</sub>).

LIFDI-MS (toluene): *m/z* = 644.15 (100 %, [M]<sup>+</sup>).

EA C<sub>32</sub>H<sub>52</sub>N<sub>2</sub>SiCoP<sub>3</sub>: calc [%]: C 59.60; H 8.13; N 4.35; found [%]: C 60.07; H 7.66; N 3.99.

## 1.10 Synthesis of $[\text{Cp}^{\text{***}}\text{Co}(\eta^3\text{-As}_3\text{SiL})]$ ( $\text{L} = (\text{tBuN})_2\text{CPh}$ ) (**12**)

A mixture of  $\text{KCp}^{\text{***}}$  and  $[\text{K}(\text{thf})_{0.8}][\mathbf{6}]$  (200 mg, 0.199 mmol, 1 eq) in thf was cooled to  $-80\text{ }^\circ\text{C}$  and  $(\text{tBuN})_2\text{CPhSiCl}$  (66 mg, 0.199 mmol, 1 eq) was added, while no change of the color was observed. The mixture was allowed to reach room temperature, while the color changed from dark green to brown-green. The solvent was removed *in vacuo*. The residue was extracted with toluene and filtered over diatomaceous earth. The solvent was removed *in vacuo*, *n*-pentane was added and toluene dropwise until complete dissolution. After storage at  $-30\text{ }^\circ\text{C}$  for one day, **12** can be obtained as dark brown needles. The supernatant was decanted off and the obtained crystals dried *in vacuo*.

Yield: 28 mg (0.036 mmol, 18 %).

$^1\text{H NMR}$  ( $\text{C}_6\text{D}_6$ ,  $25\text{ }^\circ\text{C}$ ):  $\delta$  [ppm] = 6.86 (m, 1H,  $(\text{tBuN})_2\text{CPhSiAs}_3$ ), 6.76 (m, 2H,  $(\text{tBuN})_2\text{CPhSiAs}_3$ ), 6.63 (m, 2H,  $(\text{tBuN})_2\text{CPhSiAs}_3$ ), 5.12 (s, 2H,  $\text{C}_5\text{H}_2^{\text{tBu}_3}$ ), 1.70 (s, 18H,  $\text{C}_5\text{H}_2^{\text{tBu}_3}$ ), 1.54 (s, 9H,  $\text{C}_5\text{H}_2^{\text{tBu}_3}$ ), 1.21 (s, 5H,  $(\text{tBuN})_2\text{CPhSiAs}_3$ ), 1.19 (s, 5H,  $(\text{tBuN})_2\text{CPhSiAs}_3$ ).

$^{29}\text{Si}\{^1\text{H}\}$  NMR (thf- $d_8$ ,  $25\text{ }^\circ\text{C}$ ):  $\delta$  [ppm] = -51.59 (s,  $(\text{tBuN})_2\text{CPhSiAs}_3$ ).

LIFDI-MS (toluene):  $m/z$  = 883.97 (5 %,  $[(\text{Cp}^{\text{***}}\text{Co})_2(\text{As}_2)_2]^+$ ), 776.07 (100 %,  $[\text{M}]^+$ ).

EA  $\text{C}_{32}\text{H}_{52}\text{N}_2\text{SiCoAs}_3$ : calc [%]: C 49.49; H 6.75; N 3.60; found [%]: C 49.89; H 6.74; N 3.42.

## 1.11 Synthesis of [Cp<sup>'''</sup>Co( $\eta^2$ : $\eta^1$ -As<sub>3</sub>P<sub>2</sub>Ph<sub>4</sub>)] [TEF] (13)

A solution of **10a** (50 mg, 0.043 mmol, 1 eq) and Ph<sub>2</sub>PCl (0.2 ml, c = 0.25 mol/L in toluene, 0.05 mmol, 1.16 eq) in CH<sub>2</sub>Cl<sub>2</sub> was cooled to -80 °C and a solution of Ti[TEF] (49.3 mg, 0.043 mmol, 1 eq) in CH<sub>2</sub>Cl<sub>2</sub> was added dropwise. The color changed immediately from dark red to brown while a white precipitate (TiCl) was formed. The reaction mixture was warmed to room temperature and stirred for further 2 h. The reaction mixture was filtered over diatomaceous earth and the solvent removed *in vacuo*. The residue was washed with *n*-pentane. The residue was dissolved in CH<sub>2</sub>Cl<sub>2</sub> and layered with *n*-pentane. After a few days, **13** can be obtained as red blocks. The supernatant was decanted off and the obtained crystals dried *in vacuo*.

Yield: 26 mg (0.014 mmol, 33 %).

<sup>1</sup>H NMR (CD<sub>2</sub>Cl<sub>2</sub>, 25 °C):  $\delta$  [ppm] = 8.01 (m, 2H, As<sub>3</sub>P<sub>2</sub>Ph<sub>4</sub>), 7.85 (m, 2H, As<sub>3</sub>P<sub>2</sub>Ph<sub>4</sub>), 7.61 (m, 4H, As<sub>3</sub>P<sub>2</sub>Ph<sub>4</sub>), 7.52 (m, 2H, As<sub>3</sub>P<sub>2</sub>Ph<sub>4</sub>), 7.36 (m, 1H, As<sub>3</sub>P<sub>2</sub>Ph<sub>4</sub>), 7.18 (m, 4H, As<sub>3</sub>P<sub>2</sub>Ph<sub>4</sub>), 7.02 (m, 1H, As<sub>3</sub>P<sub>2</sub>Ph<sub>4</sub>), 6.81 (m, 4H, As<sub>3</sub>P<sub>2</sub>Ph<sub>4</sub>), 5.05 (d, 1H, <sup>2</sup>J<sub>HH</sub> = 2.5 Hz, C<sub>5</sub>H<sub>2</sub><sup>t</sup>Bu<sub>3</sub>), 4.74 (t, 1H, <sup>2</sup>J<sub>HH</sub> = 2.5 Hz, <sup>3</sup>J<sub>PH</sub> = 2.5 Hz, C<sub>5</sub>H<sub>2</sub><sup>t</sup>Bu<sub>3</sub>), 1.27 (s, 9H, C<sub>5</sub>H<sub>2</sub><sup>t</sup>Bu<sub>3</sub>), 1.24 (s, 9H, C<sub>5</sub>H<sub>2</sub><sup>t</sup>Bu<sub>3</sub>), 1.15 (s, 9H, C<sub>5</sub>H<sub>2</sub><sup>t</sup>Bu<sub>3</sub>).

<sup>19</sup>F{<sup>1</sup>H} NMR (CD<sub>2</sub>Cl<sub>2</sub>, 25 °C):  $\delta$  [ppm] = -75.6 (s, [TEF]).

<sup>31</sup>P{<sup>1</sup>H} NMR (CD<sub>2</sub>Cl<sub>2</sub>, 25 °C):  $\delta$  [ppm] = 2.4 (d, 1P, <sup>2</sup>J<sub>PP</sub> = 41 Hz, As<sub>3</sub>P<sub>2</sub>Ph<sub>4</sub>), -27.1 (d, 1P, <sup>2</sup>J<sub>PP</sub> = 41 Hz, As<sub>3</sub>P<sub>2</sub>Ph<sub>4</sub>).

<sup>31</sup>P NMR (CD<sub>2</sub>Cl<sub>2</sub>, 25 °C):  $\delta$  [ppm] = 2.4 (m, 1P, As<sub>3</sub>P<sub>2</sub>Ph<sub>4</sub>), -27.1 (m, 1P, As<sub>3</sub>P<sub>2</sub>Ph<sub>4</sub>).

ESI-MS (CH<sub>2</sub>Cl<sub>2</sub>): *m/z* = 886.96 (100 %, [M]<sup>+</sup>).

EA C<sub>57</sub>H<sub>49</sub>CoAs<sub>3</sub>P<sub>2</sub>AlO<sub>4</sub>F<sub>36</sub>: calc [%]: C 36.91; H 2.66; found [%]: C 37.14, H 2.70.



## 2. NMR spectroscopic investigations

### 2.1 $[\text{K}(\text{thf})_{0.7}][\text{Cp}^{\text{III}}\text{Co}(\eta^3\text{-P}_3)] ([\text{K}(\text{thf})_{0.7}][\mathbf{5}])$

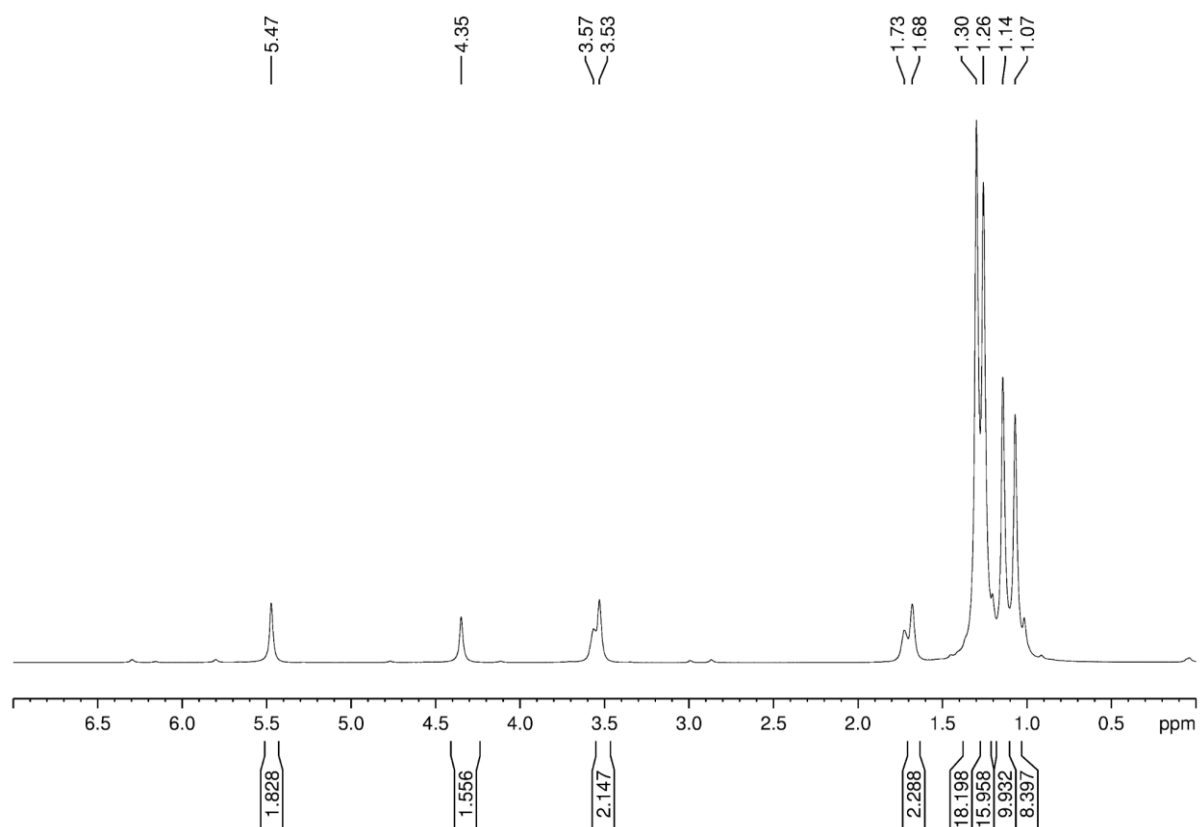

**Figure S1.**  $^1\text{H}$  NMR spectrum in  $\text{thf-d}_8$  of the mixture of  $[\text{K}(\text{thf})_{0.7}][\mathbf{5}]$  and  $\text{Cp}^{\text{III}}\text{K}$  at room temperature.

## 2.2 [K(18-c-6)][Cp<sup>'''</sup>Co( $\eta^3$ -P<sub>3</sub>)] ([K(18-c-6))][5]

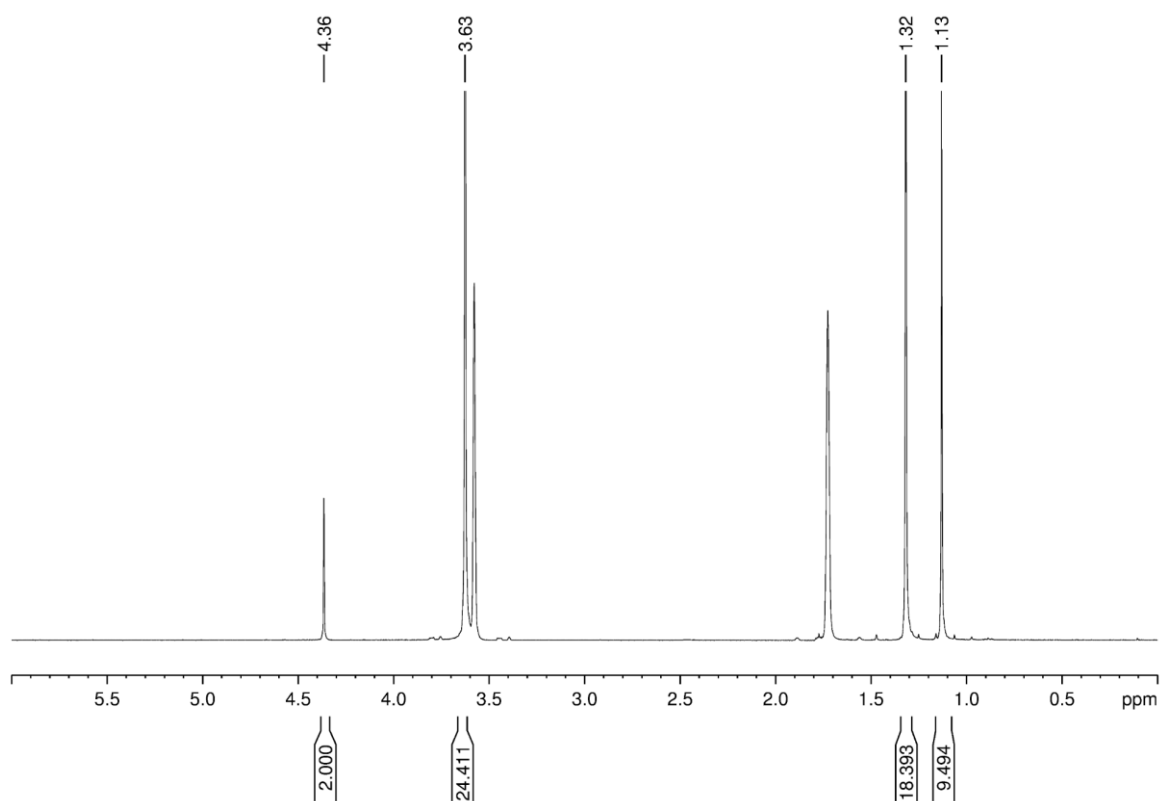

**Figure S2.** <sup>1</sup>H NMR spectrum of [K(18-c-6)][5] in thf-d<sub>8</sub> at room temperature.

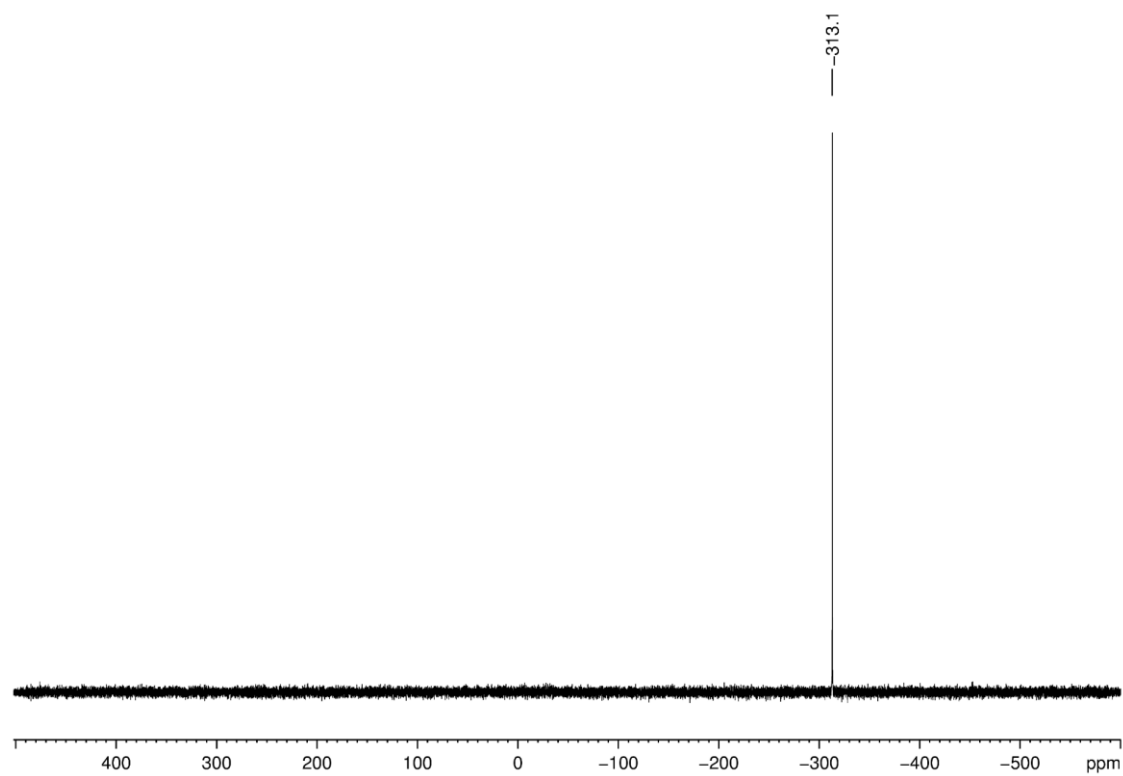

**Figure S3.** <sup>31</sup>P{<sup>1</sup>H} NMR spectrum of [K(18-c-6)][5] in thf-d<sub>8</sub> at room temperature.

### 2.3 $[\text{K}(\text{thf})_{0.8}][\text{Cp}^{\text{III}}\text{Co}(\eta^3\text{-As}_3)]$ ( $[\text{K}(\text{thf})_{0.8}][\mathbf{6}]$ )

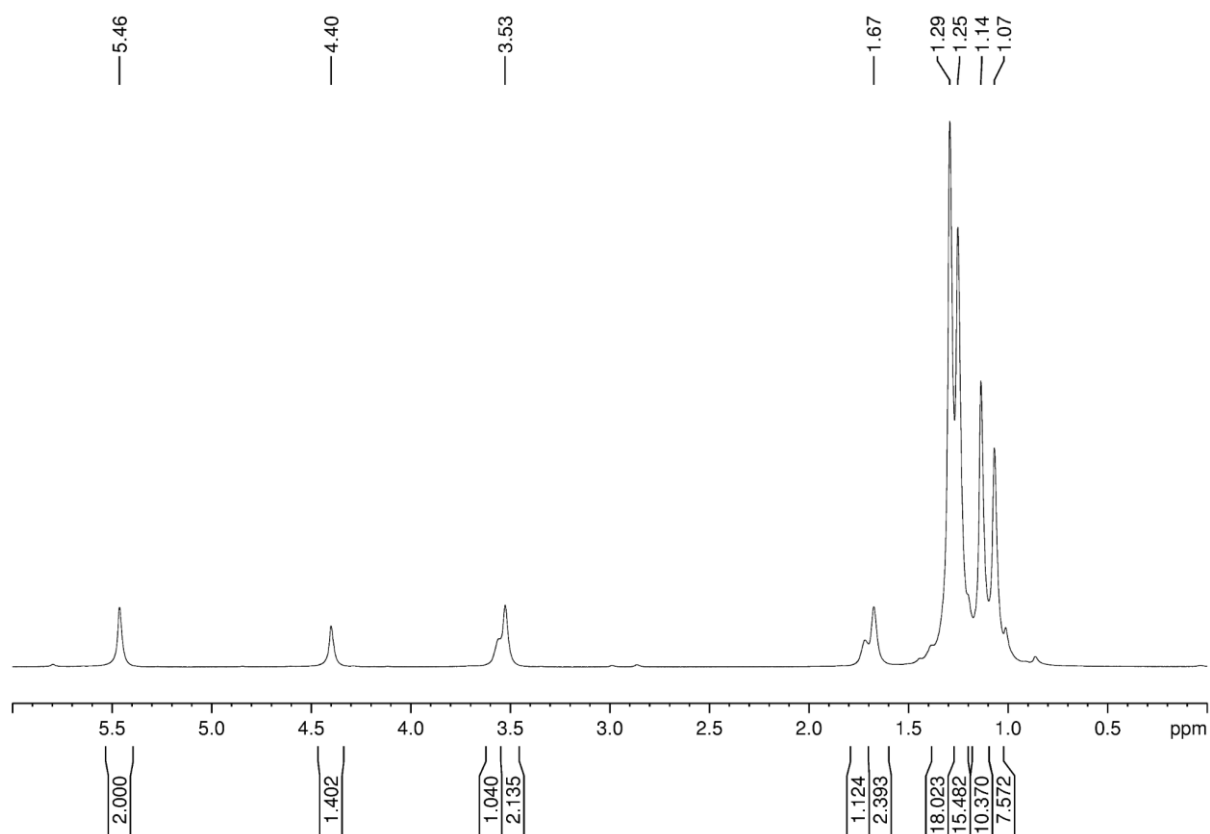

**Figure S4.**  $^1\text{H}$  NMR spectrum in  $\text{thf-d}_8$  of the mixture of  $[\text{K}(\text{thf})_{0.8}][\mathbf{6}]$  and  $\text{Cp}^{\text{III}}\text{K}$  at room temperature.

## 2.4 [K(18-c-6)][Cp<sup>'''</sup>Co(η<sup>3</sup>-As<sub>3</sub>)] ([K(18-c-6)][6])

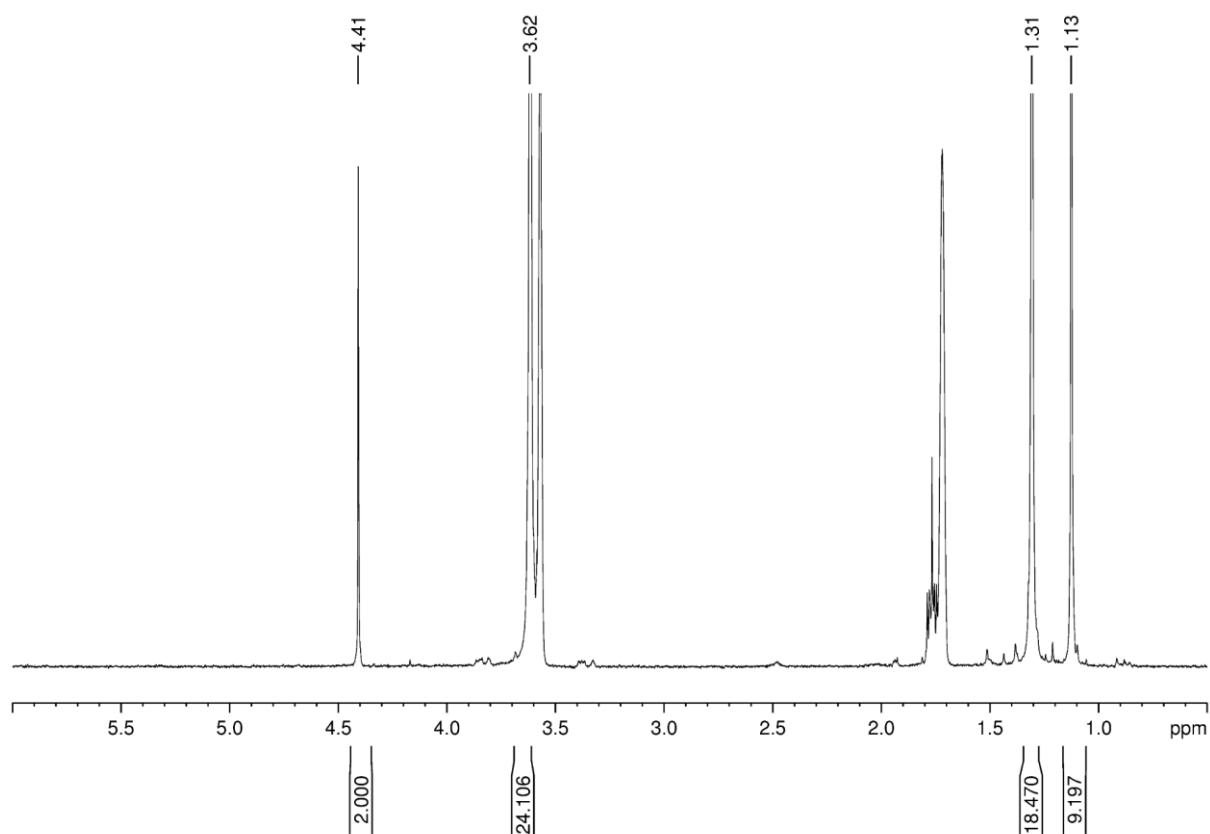

**Figure S5.** <sup>1</sup>H NMR spectrum of [K(18-c-6)][6] in thf-d<sub>8</sub> at room temperature.

## 2.5 [Cp<sup>'''</sup>Co(η<sup>3</sup>-P<sub>4</sub>Ph<sub>2</sub>)] (7a)

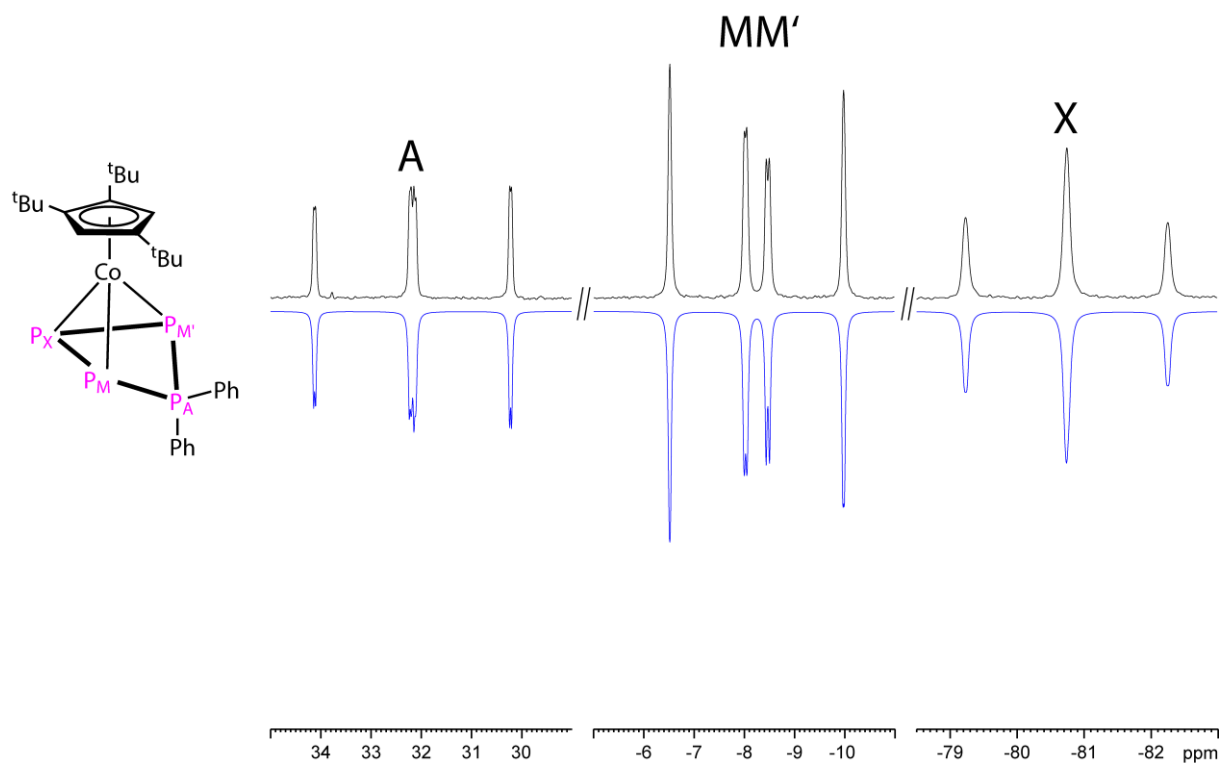

**Figure S6:**  $^{31}\text{P}\{^1\text{H}\}$  NMR spectrum of **7a** in  $\text{C}_6\text{D}_6$  at room temperature (experimental (black) and simulated (blue)).

**Table S1:** Coupling constants and chemical shifts obtained from the simulation of the  $^{31}\text{P}\{^1\text{H}\}$  NMR spectrum.

| coupling constants [Hz] |        | chemical shifts [ppm] |        |
|-------------------------|--------|-----------------------|--------|
| $^1J_{P_A P_M}$         | 314.82 | $P_A$                 | 32.13  |
| $^1J_{P_A P_{M'}}$      | 317.30 | $P_M$                 | -8.23  |
| $^1J_{P_M P_X}$         | 244.85 | $P_M$                 | -8.23  |
| $^1J_{P_M P_{X'}}$      | 244.10 | $P_X$                 | -80.72 |
| $^2J_{P_M P_{M'}}$      | -9.45  |                       |        |
| $^2J_{P_A P_X}$         | 6.33   |                       |        |
| R value                 |        | 0.51 %                |        |

## 2.6 Reaction of $[\text{K}(\text{thf})_{0.7}][\text{Cp}^{\text{**}}\text{Co}(\eta^3\text{-P}_3)]$ ( $[\text{K}(\text{thf})_{0.7}][\mathbf{5}]$ ) with $\text{Ph}_2\text{PCI}$

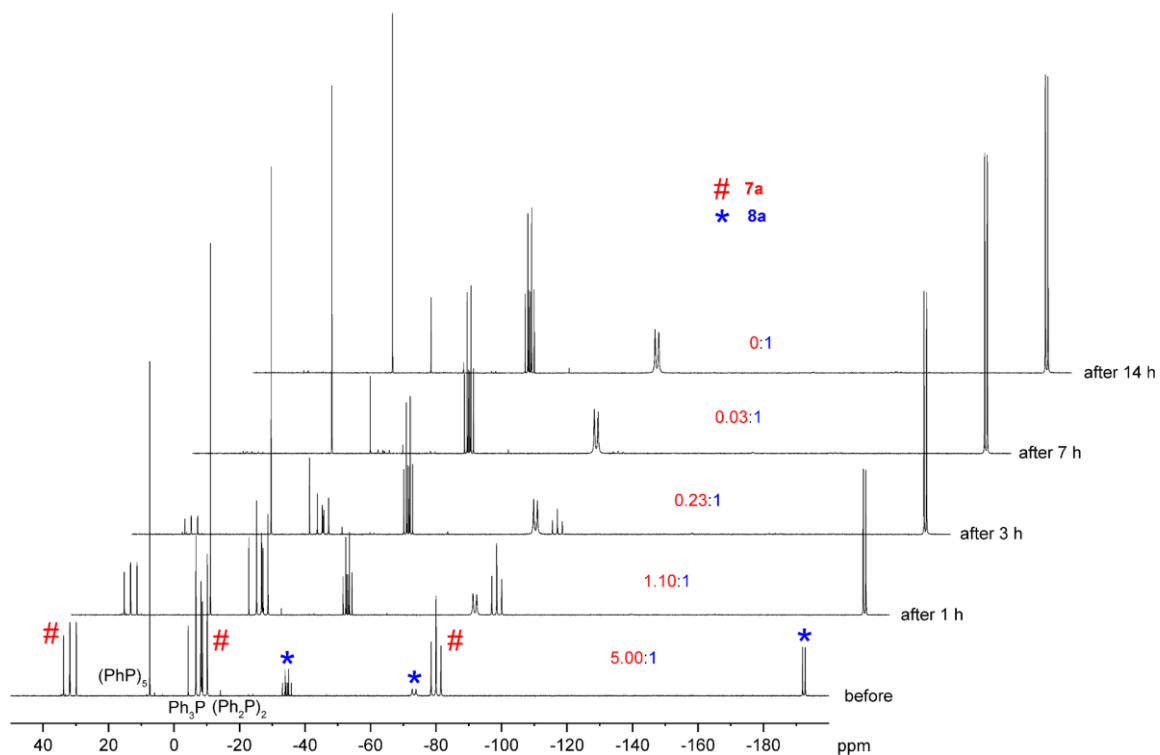

**Figure S7:**  $^{31}\text{P}\{^1\text{H}\}$  NMR spectra of the reaction of  $[\text{K}(\text{thf})_{0.7}][\mathbf{5}]$  with  $\text{Ph}_2\text{PCI}$  in toluene- $d_8$  before thermolysis and after 1, 3, 7 and 14 h at 60 °C.

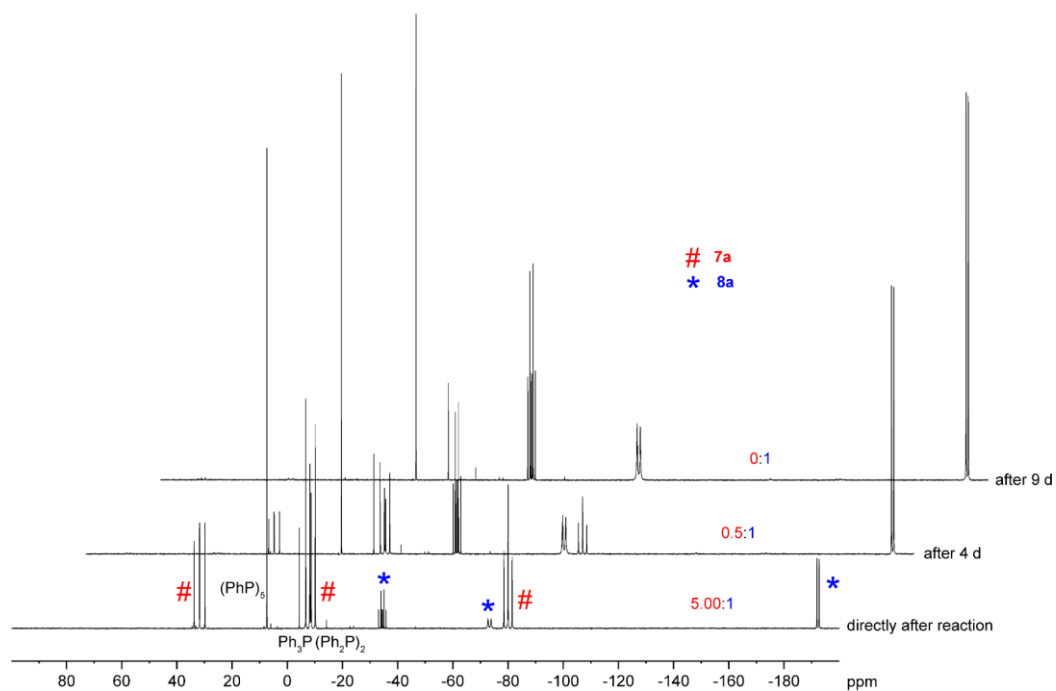

**Figure S8:**  $^{31}\text{P}\{^1\text{H}\}$  NMR spectra of the reaction of  $[\text{K}(\text{thf})_{0.7}][\mathbf{5}]$  with  $\text{Ph}_2\text{PCI}$  in toluene- $d_8$  at room temperature directly after the reaction and after 4 and 9 days.

## 2.7 [Cp<sup>'''</sup>Co(η<sup>3</sup>-P<sub>4</sub>Cy<sub>2</sub>)] (7b)

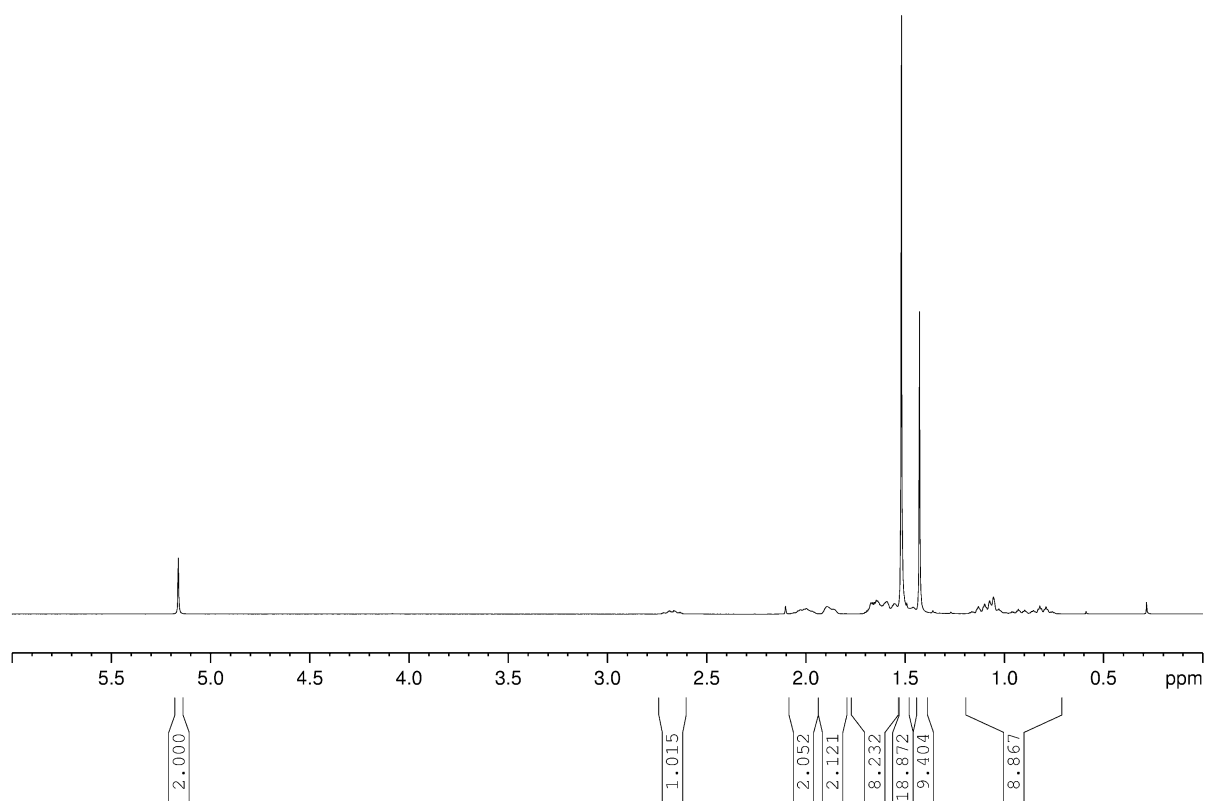

**Figure S9:** <sup>1</sup>H NMR spectrum of **7b** in C<sub>6</sub>D<sub>6</sub> at room temperature.

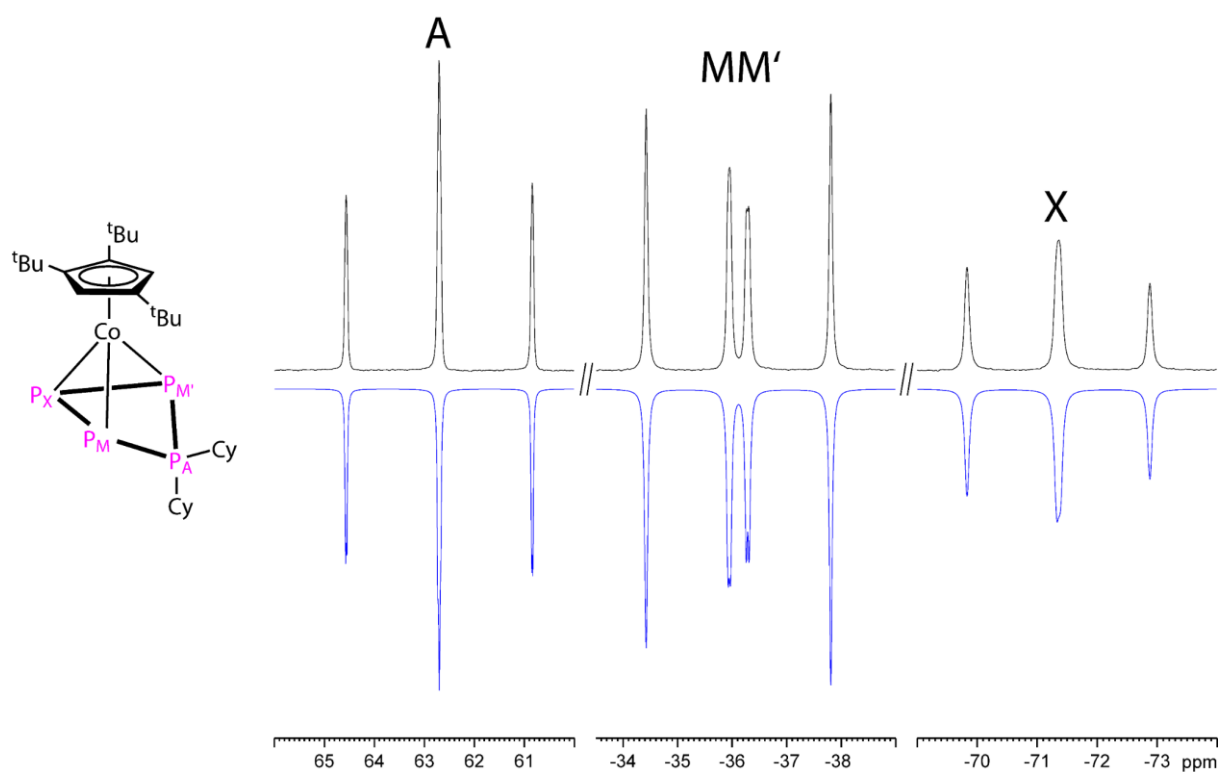

**Figure S10:**  $^{31}\text{P}\{^1\text{H}\}$  NMR spectrum of **7b** in  $\text{C}_6\text{D}_6$  at room temperature (experimental (black) and simulated (blue)).

**Table S2:** Coupling constants and chemical shifts obtained from the simulation of the  $^{31}\text{P}\{^1\text{H}\}$  NMR spectrum.

| coupling constants [Hz] |        | chemical shifts [ppm] |        |
|-------------------------|--------|-----------------------|--------|
| $^1J_{P_A P_M}$         | 300.51 | $P_A$                 | 62.69  |
| $^1J_{P_A P_{M'}}$      | 302.99 | $P_M$                 | -36.13 |
| $^1J_{P_M P_X}$         | 246.68 | $P_M$                 | -36.12 |
| $^1J_{P_M P_{X'}}$      | 247.51 | $P_X$                 | -71.32 |
| $^2J_{P_M P_{M'}}$      | -6.92  |                       |        |
| $^2J_{P_A P_X}$         | 3.80   |                       |        |
| R value                 |        | 1.19 %                |        |



## 2.8 Reaction of $[\text{K}(\text{thf})_{0.7}][\text{Cp}^{\text{**}}\text{Co}(\eta^3\text{-P}_3)]$ ( $[\text{K}(\text{thf})_{0.7}][\mathbf{5}]$ ) with $\text{Cy}_2\text{PCI}$

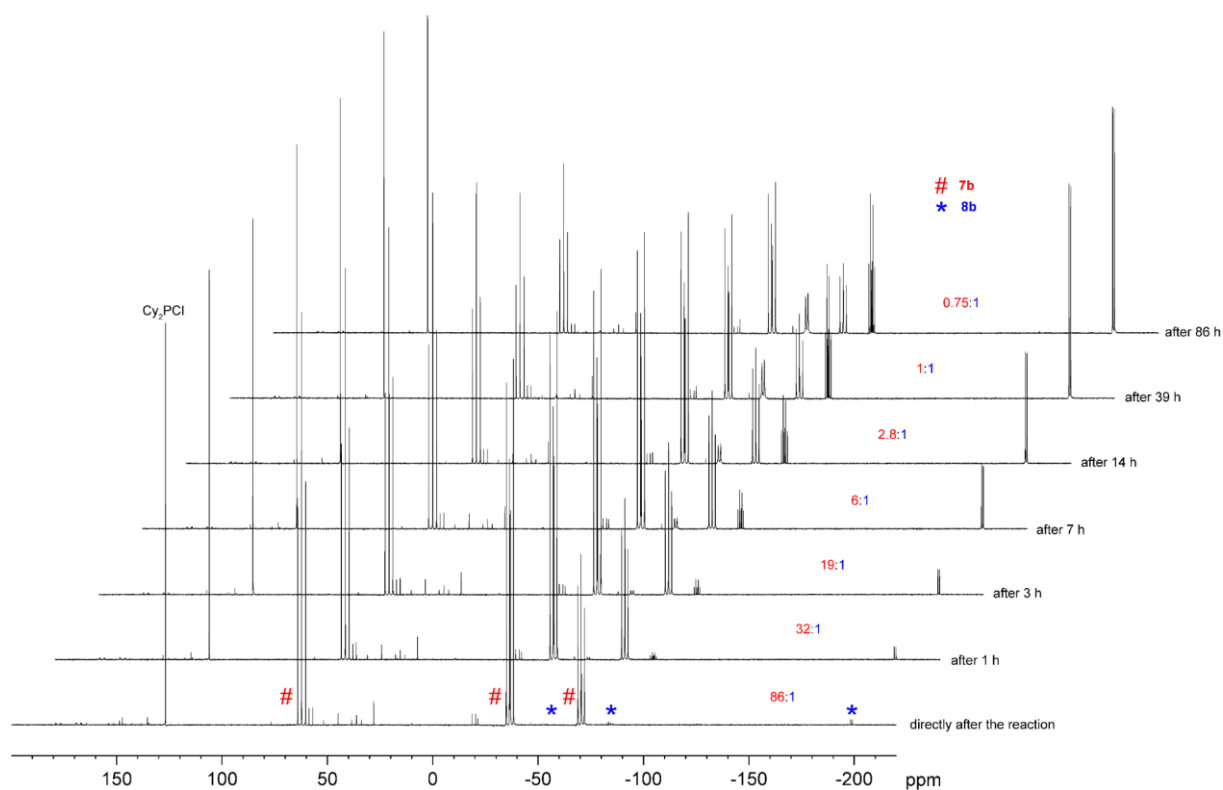

**Figure S11:**  $^{31}\text{P}\{^1\text{H}\}$  NMR spectra of the reaction of  $[\text{K}(\text{thf})_{0.7}][\mathbf{5}]$  with  $\text{Cy}_2\text{PCI}$  in  $\text{toluene-d}_8$  before thermolysis and after 1, 3, 7, 14, 39 and 86 h at  $60\text{ }^\circ\text{C}$ .

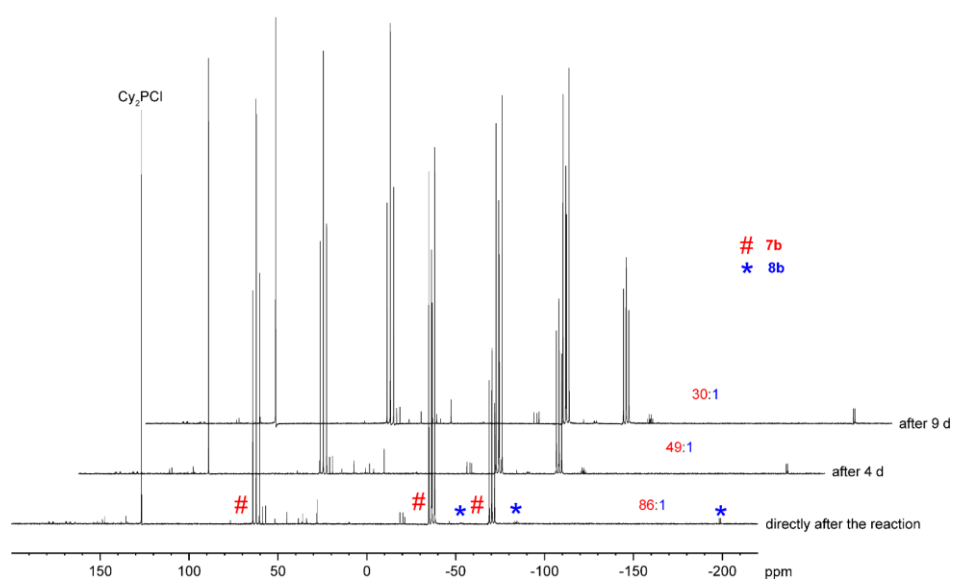

**Figure S12:**  $^{31}\text{P}\{^1\text{H}\}$  NMR spectra of the reaction of  $[\text{K}(\text{thf})_{0.7}][\mathbf{5}]$  with  $\text{Cy}_2\text{PCI}$  in  $\text{toluene-d}_8$  at room temperature directly after the reaction and after 4 and 9 days.

## 2.9 [Cp<sup>'''</sup>Co(η<sup>3</sup>-P<sub>4</sub>tBu<sub>2</sub>)] (7c)

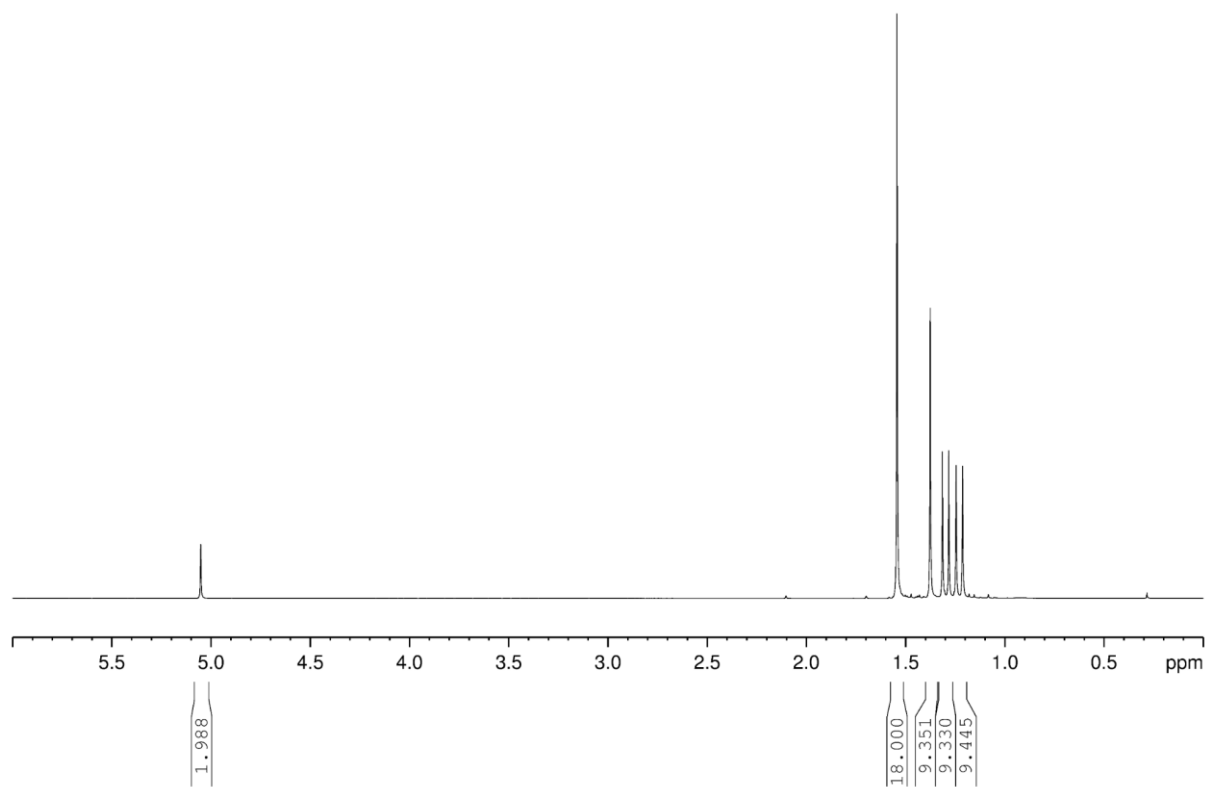

**Figure S13:** <sup>1</sup>H NMR spectrum of **7c** in C<sub>6</sub>D<sub>6</sub> at room temperature.

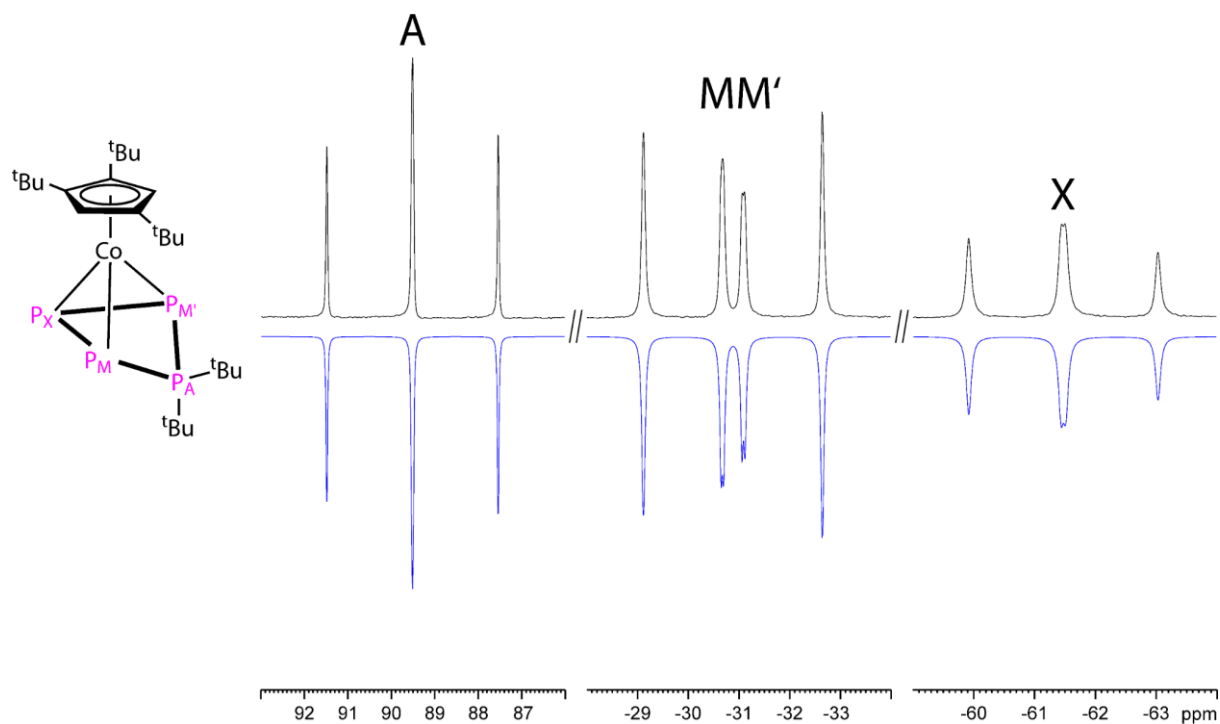

**Figure S14:**  $^{31}\text{P}\{^1\text{H}\}$  NMR spectrum of **7c** in  $\text{C}_6\text{D}_6$  at room temperature (experimental (black) and simulated (blue)).

**Table S3:** Coupling constants and chemical shifts obtained from the simulation of the  $^{31}\text{P}\{^1\text{H}\}$  NMR spectrum.

| coupling constants [Hz] |        | chemical shifts [ppm] |        |
|-------------------------|--------|-----------------------|--------|
| $^1J_{P_A P_M}$         | 319.64 | $P_A$                 | 89.50  |
| $^1J_{P_A P_{M'}}$      | 319.71 | $P_M$                 | -30.89 |
| $^1J_{P_M P_X}$         | 252.52 | $P_M$                 | -30.90 |
| $^1J_{P_M P_{X'}}$      | 252.01 | $P_X$                 | -61.43 |
| $^2J_{P_M P_{M'}}$      | 3.16   |                       |        |
| $^2J_{P_A P_X}$         | 2.41   |                       |        |
| R value                 |        | 0.28 %                |        |

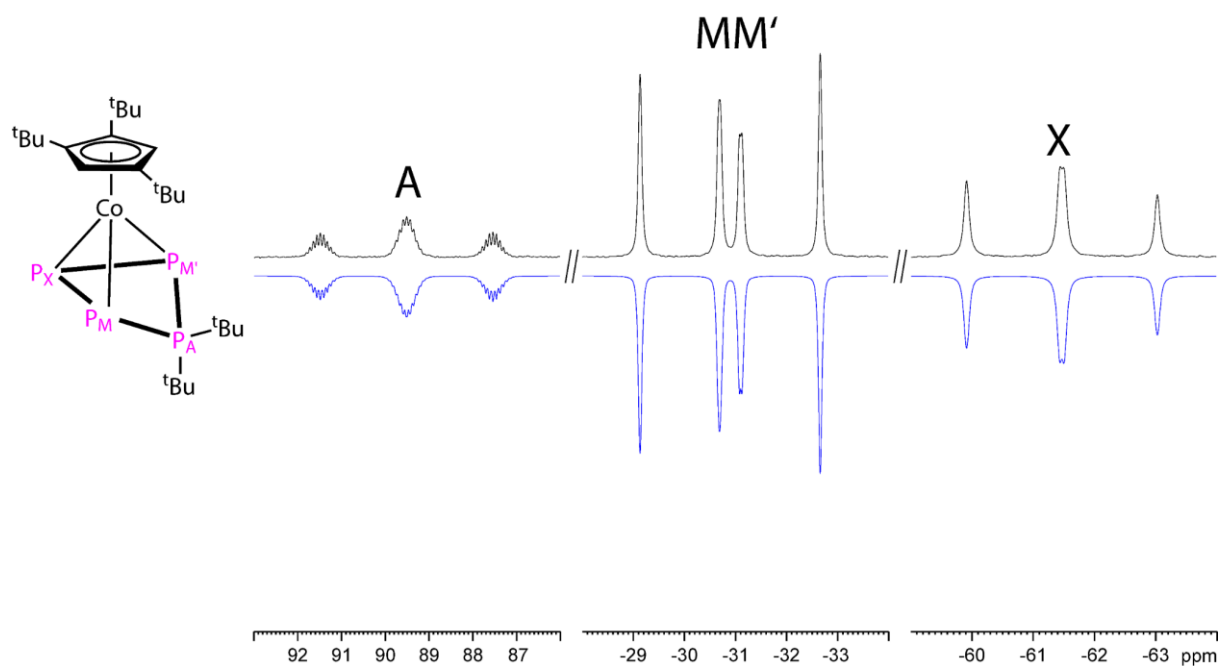

**Figure S15:**  $^{31}\text{P}$  NMR spectrum of **7c** in  $\text{C}_6\text{D}_6$  at room temperature (experimental (black) and simulated (blue)).

**Table S4:** Coupling constants and chemical shifts obtained from the simulation of the  $^{31}\text{P}$  NMR spectrum.

|                    | coupling constants [Hz] |               | chemical shifts [ppm] |
|--------------------|-------------------------|---------------|-----------------------|
| $^1J_{P_A P_M}$    | 319.72                  | $P_A$         | 89.50                 |
| $^1J_{P_A P_{M'}}$ | 319.55                  | $P_M$         | -30.91                |
| $^1J_{P_M P_X}$    | 252.27                  | $P_M$         | -30.91                |
| $^1J_{P_M P_{X'}}$ | 252.33                  | $P_X$         | -61.43                |
| $^2J_{P_M P_{M'}}$ | 5.04                    |               |                       |
| $^2J_{P_A P_X}$    | -0.16                   |               |                       |
| $^3J_{P_A H}$      | 13.13                   |               |                       |
| $^4J_{P_M H}$      | 1.05                    |               |                       |
| $^4J_{P_{M'} H}$   | 2.88                    |               |                       |
| $^5J_{P_X H}$      | 1.85                    | $^3J_{P_A H}$ | 13.13                 |
|                    | R value                 |               | 0.38 %                |

## 2.10 Reaction of $[K(thf)_{0.7}[Cp^{***}Co(\eta^3-P_3)]$ ( $[K(thf)_{0.7}][5]$ ) with ${}^tBu_2PCl$

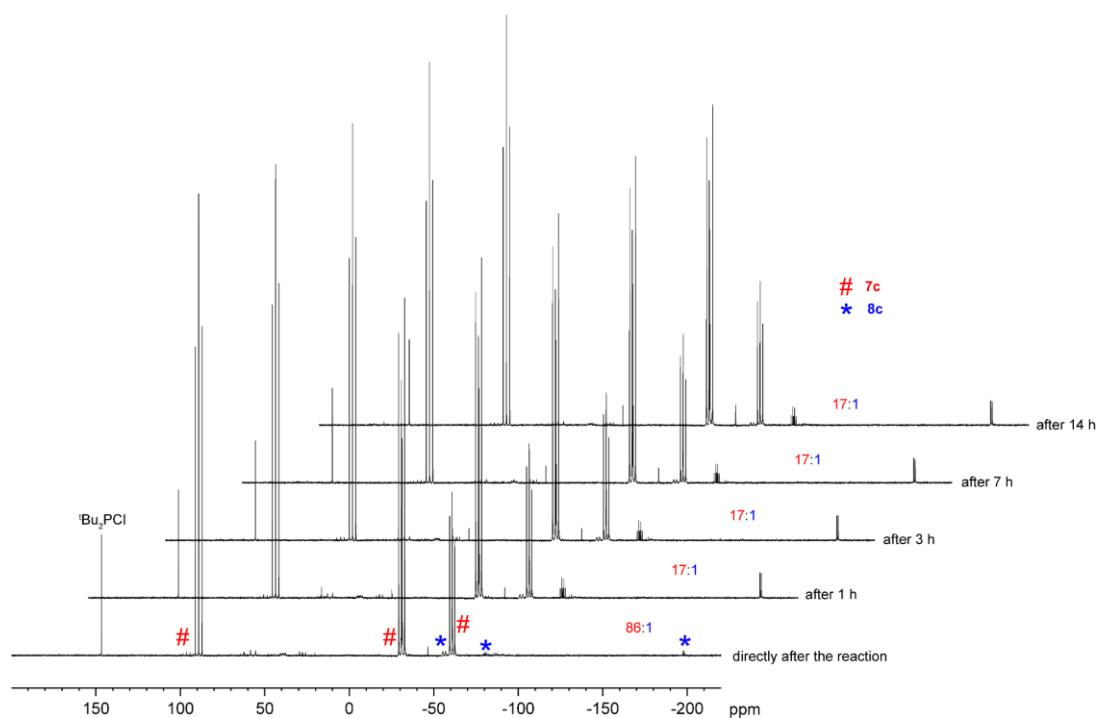

**Figure S16:**  ${}^{31}P\{^1H\}$  NMR spectra of the reaction of  $[K(thf)_{0.7}][5]$  with  ${}^tBu_2PCl$  in toluene- $d_8$  before thermolysis and after 1, 3, 7 and 14 h at 60 °C.

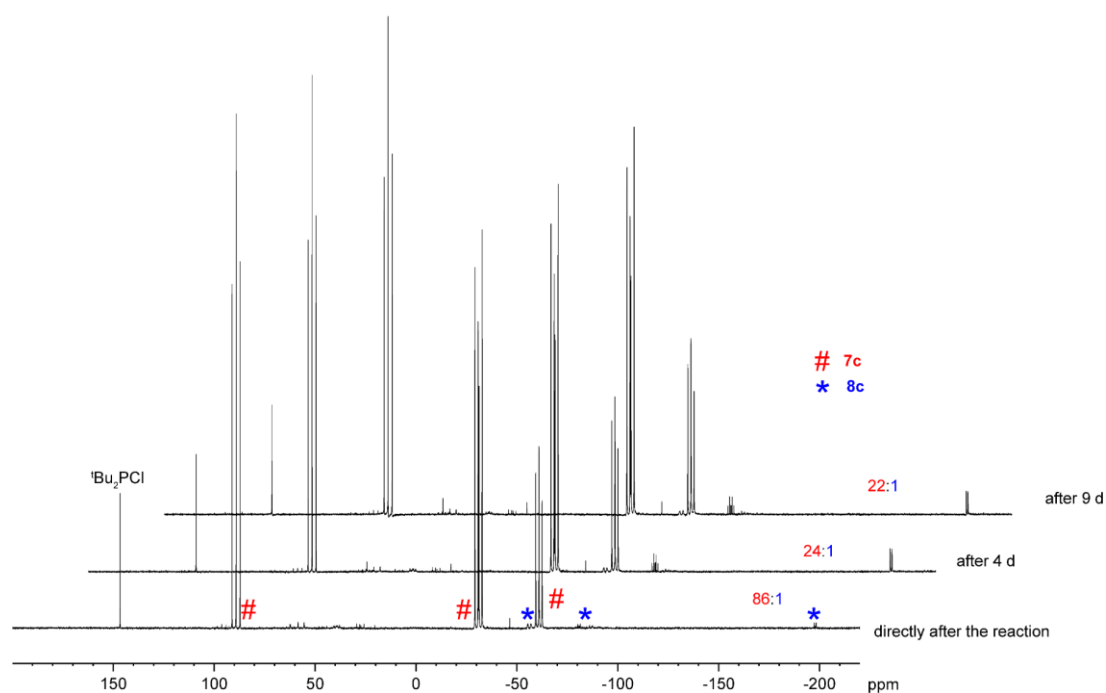

**Figure S17:**  ${}^{31}P\{^1H\}$  NMR spectra of the reaction of  $[K(thf)_{0.7}][5]$  with  ${}^tBu_2PCl$  in toluene- $d_8$  at room temperature directly after the reaction and after 4 and 9 days.

2.11 [Cp\*\*Co( $\eta^2$ : $\eta^1$ -P<sub>4</sub>Ph<sub>2</sub>)] (**8a**)

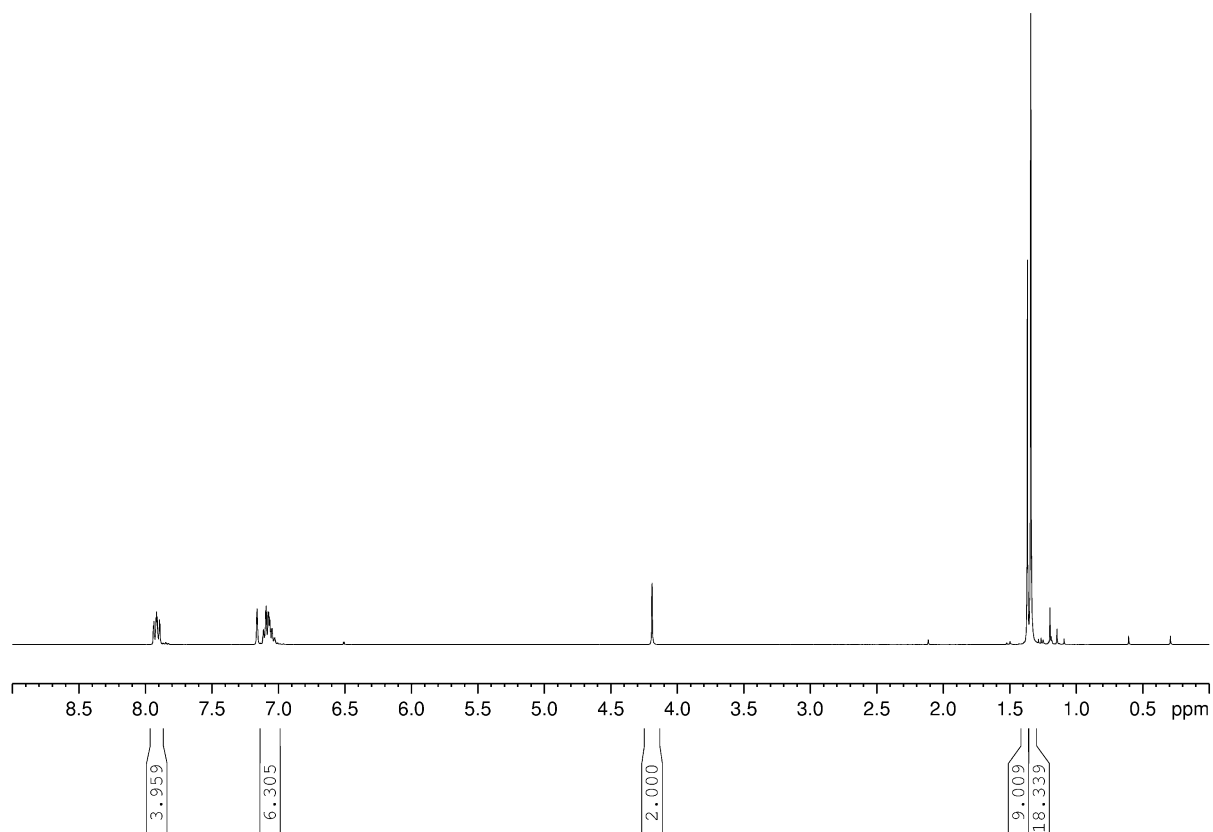

**Figure S18:** <sup>1</sup>H NMR spectrum of **8a** in C<sub>6</sub>D<sub>6</sub> at room temperature.

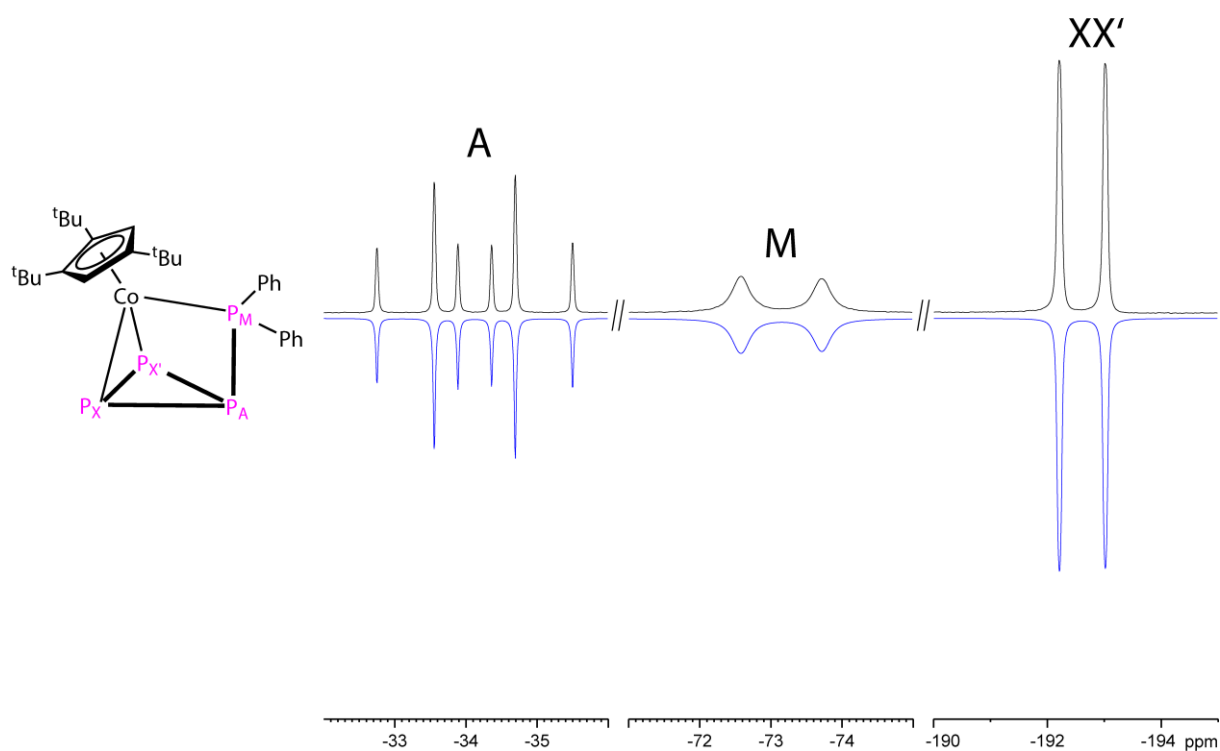

**Figure S19:**  $^{31}\text{P}\{^1\text{H}\}$  NMR spectrum of **8a** in  $\text{C}_6\text{D}_6$  at room temperature (experimental (black) and simulated (blue)).

**Table S5:** Coupling constants and chemical shifts obtained from the simulation of the  $^{31}\text{P}\{^1\text{H}\}$  NMR spectrum.

| coupling constants [Hz] |        | chemical shifts [ppm] |         |
|-------------------------|--------|-----------------------|---------|
| $^1J_{P_A P_M}$         | 184.31 | $P_A$                 | -34.13  |
| $^1J_{P_A P_X}$         | 130.58 | $P_M$                 | -73.14  |
| $^1J_{P_A P_{X'}}$      | 130.54 | $P_X$                 | -192.62 |
| $^2J_{P_M P_X}$         | 4.00   | $P_{X'}$              | -192.62 |
| $^2J_{P_M P_{X'}}$      | -11.07 |                       |         |
| $^1J_{P_X P_{X'}}$      | -2.00  |                       |         |
| R value                 |        | 0.32 %                |         |

## 2.12 [Cp<sup>'''</sup>Co(η<sup>2</sup>:η<sup>1</sup>-P<sub>4</sub>Cy<sub>2</sub>)] (8b)

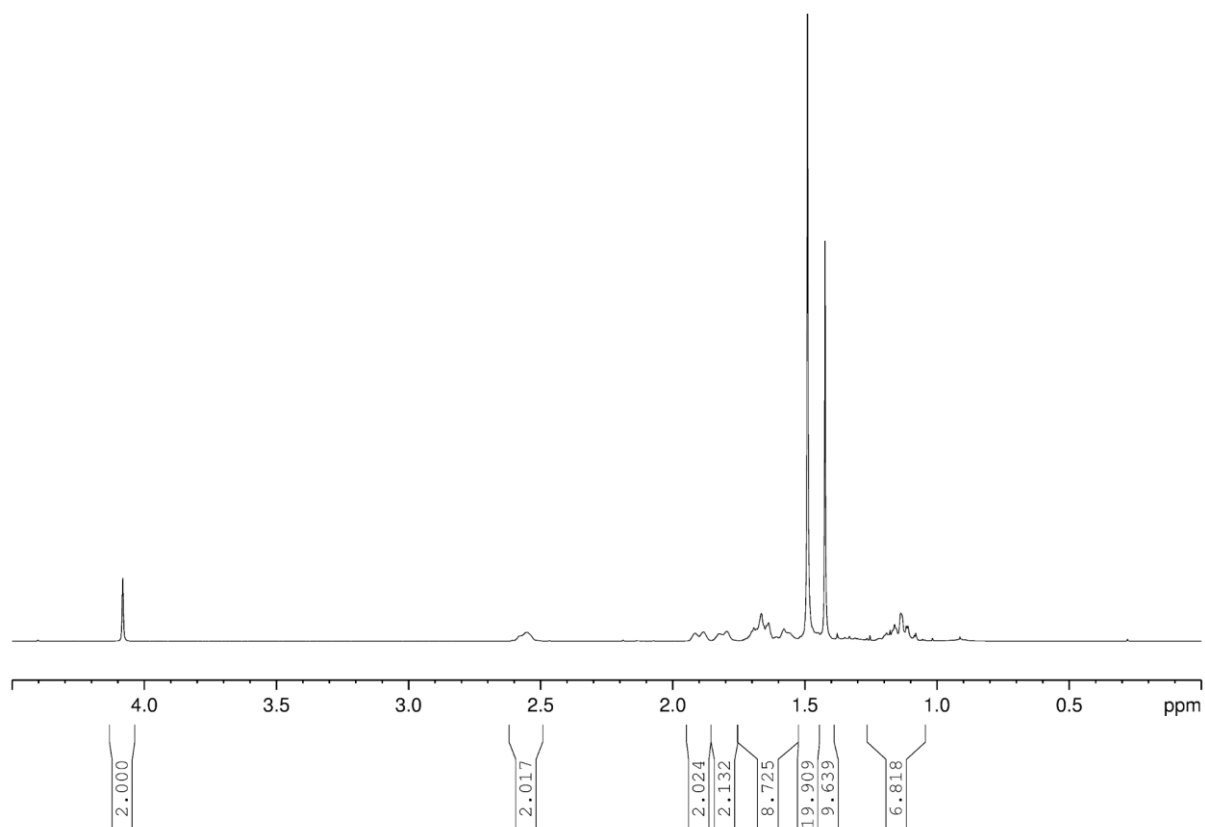

Figure S20: <sup>1</sup>H NMR spectrum of **8b** in C<sub>6</sub>D<sub>6</sub> at room temperature.

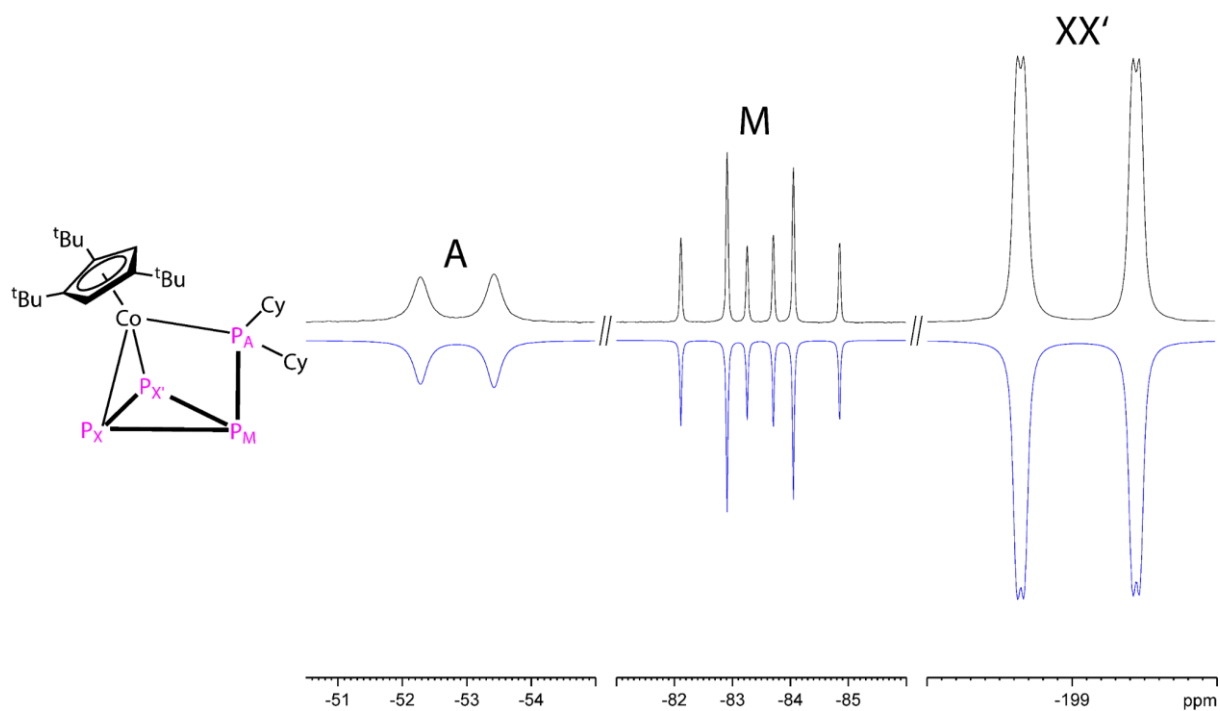

Figure S21: <sup>31</sup>P{<sup>1</sup>H} NMR spectrum of **8b** in C<sub>6</sub>D<sub>6</sub> at room temperature (experimental (black) and simulated (blue)).



**Table S6:** Coupling constants and chemical shifts obtained from the simulation of the  $^{31}\text{P}\{^1\text{H}\}$  NMR spectrum.

| coupling constants [Hz] |        | chemical shifts [ppm] |         |
|-------------------------|--------|-----------------------|---------|
| $^1J_{P_A P_M}$         | 185.20 | $P_A$                 | -52.86  |
| $^1J_{P_M P_X}$         | 129.18 | $P_M$                 | -83.47  |
| $^1J_{P_M P_{X'}}$      | 129.23 | $P_X$                 | -199.02 |
| $^2J_{P_A P_X}$         | -3.22  | $P_{X'}$              | -199.07 |
| $^2J_{P_A P_{X'}}$      | 2.92   |                       |         |
| $^1J_{P_X P_{X'}}$      | -.230  |                       |         |
| R value                 |        | 0.34 %                |         |

## 2.13 [Cp'''Co( $\eta^2$ : $\eta^1$ -P<sub>4</sub>tBu<sub>2</sub>)] (8c)

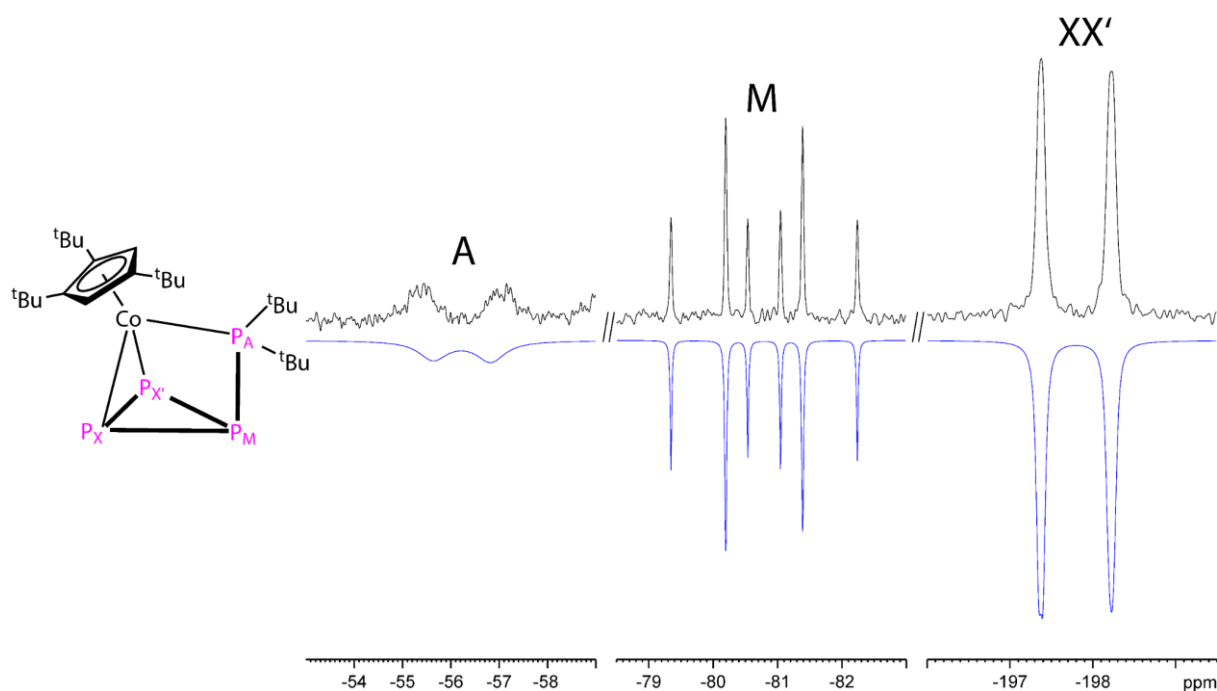

**Figure S22:** Part of the  $^{31}\text{P}\{^1\text{H}\}$  NMR spectrum of the thermolysis of **7c** in toluene- $d_8$  after 7h at 60 °C at room temperature (experimental (black) and simulated (blue)).

**Table S7:** Coupling constants and chemical shifts obtained from the partial simulation of the  $^{31}\text{P}\{^1\text{H}\}$  NMR spectrum.

| coupling constants [Hz] |        | chemical shifts [ppm] |         |
|-------------------------|--------|-----------------------|---------|
| $^1J_{P_A P_M}$         | 193.24 | P <sub>A</sub>        | -56.24  |
| $^1J_{P_M P_X}$         | 136.85 | P <sub>M</sub>        | -80.78  |
| $^1J_{P_M P_{X'}}$      | 138.95 | P <sub>X</sub>        | -197.78 |
| $^2J_{P_A P_X}$         | 8.49   | P <sub>X'</sub>       | -197.81 |
| $^2J_{P_A P_{X'}}$      | 8.18   |                       |         |
| $^1J_{P_X P_{X'}}$      | -3.63  |                       |         |
| R value                 |        | 3.15 %                |         |

## 2.14 Reaction of $[\text{K}(\text{thf})_{0.8}][\text{Cp}^*\text{Co}(\eta^3\text{-As}_3)]$ ( $[\text{K}(\text{thf})_{0.8}][\mathbf{6}]$ ) with $\text{Ph}_2\text{PCI}$

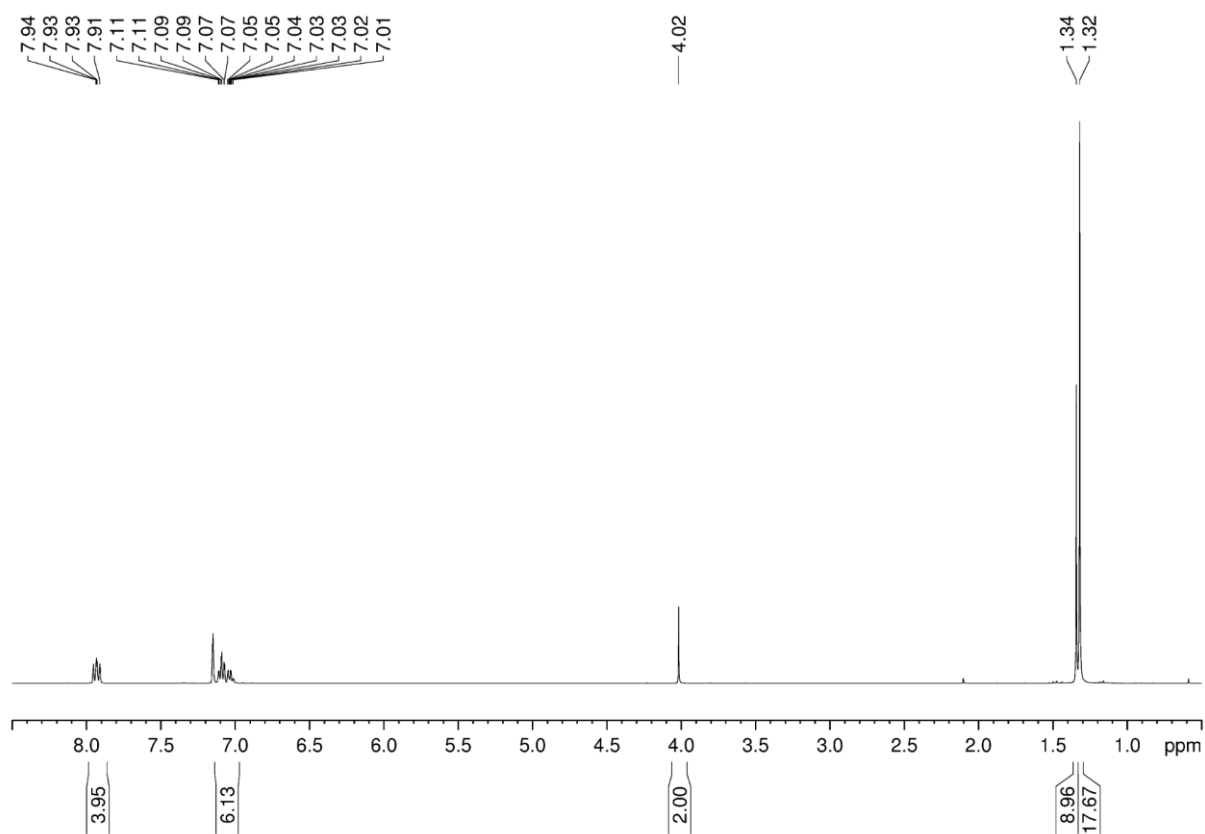

Figure S23:  $^1\text{H}$  NMR spectrum of  $\mathbf{10a}$  in  $\text{C}_6\text{D}_6$  at room temperature.

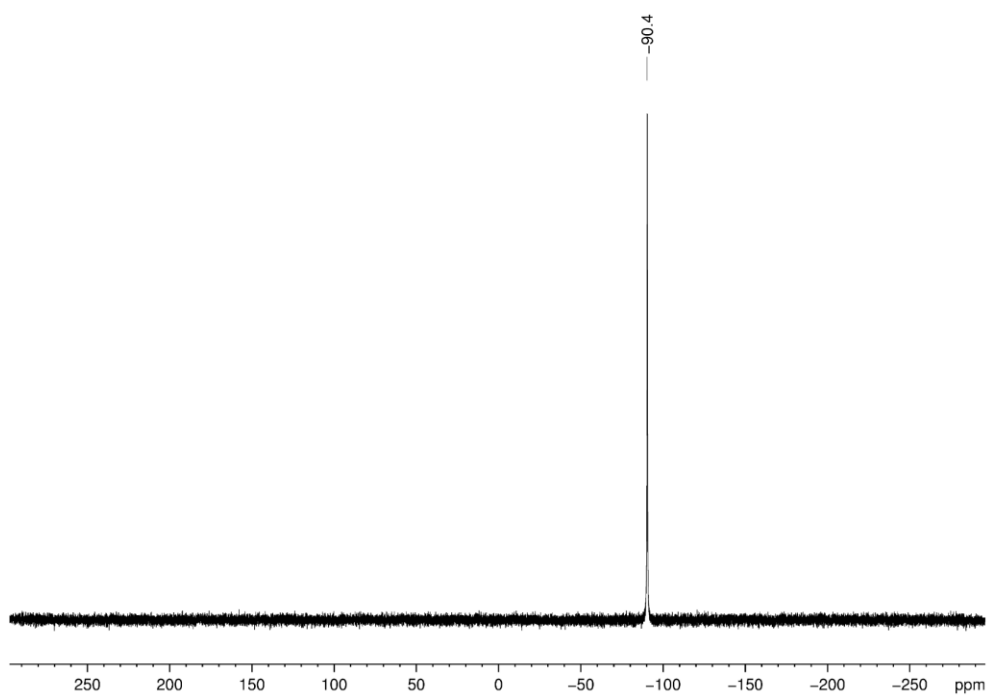

Figure S24:  $^{31}\text{P}\{^1\text{H}\}$  NMR spectrum of  $\mathbf{10a}$  in  $\text{C}_6\text{D}_6$  at room temperature.

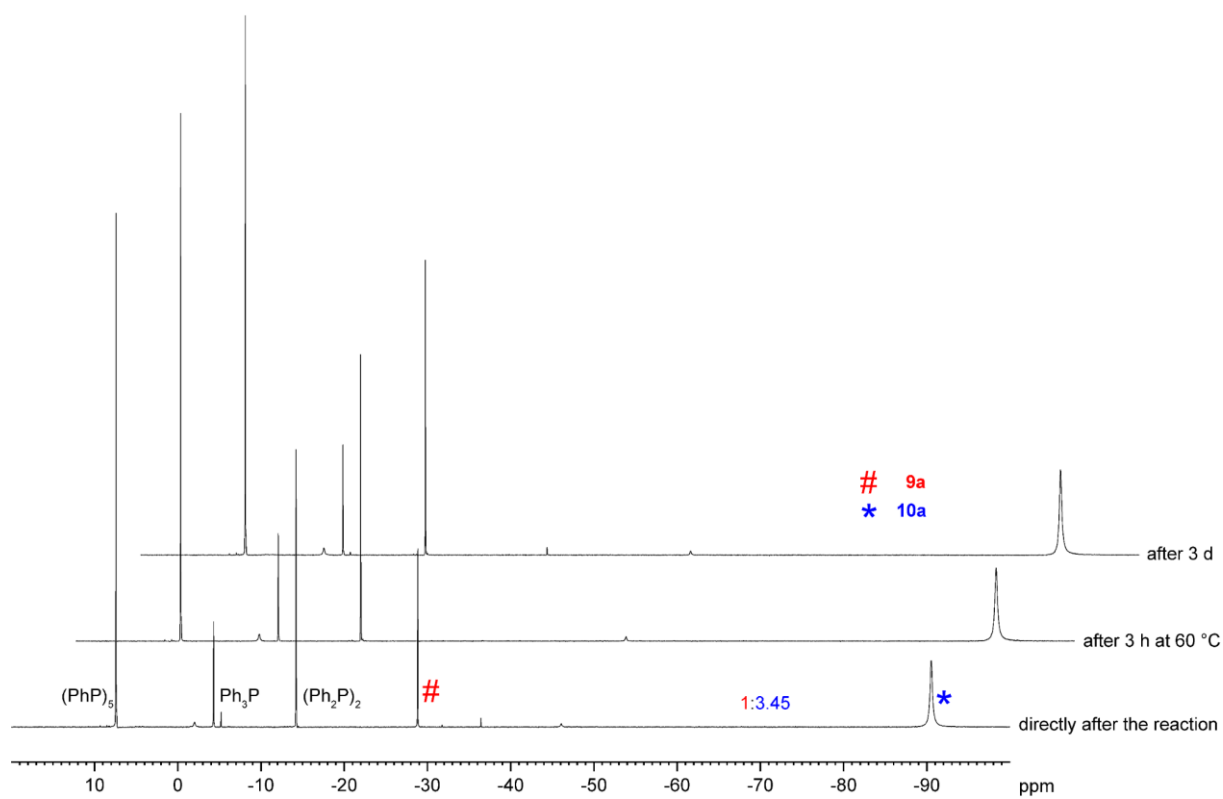

**Figure S25:**  $^{31}\text{P}\{^1\text{H}\}$  NMR spectra of the reaction of  $[\text{K}(\text{thf})_{0.8}][\mathbf{6}]$  with  $\text{Ph}_2\text{PCl}$  in toluene- $d_8$  before thermolysis and after 3 h at 60 °C and the  $^{31}\text{P}\{^1\text{H}\}$  NMR spectrum after 3 days at room temperature.

2.15 [Cp''Co( $\eta^3$ -As<sub>3</sub>PCy<sub>2</sub>)] (9b) + [Cp''Co( $\eta^2$ : $\eta^1$ -As<sub>3</sub>PCy<sub>2</sub>)] (10b)

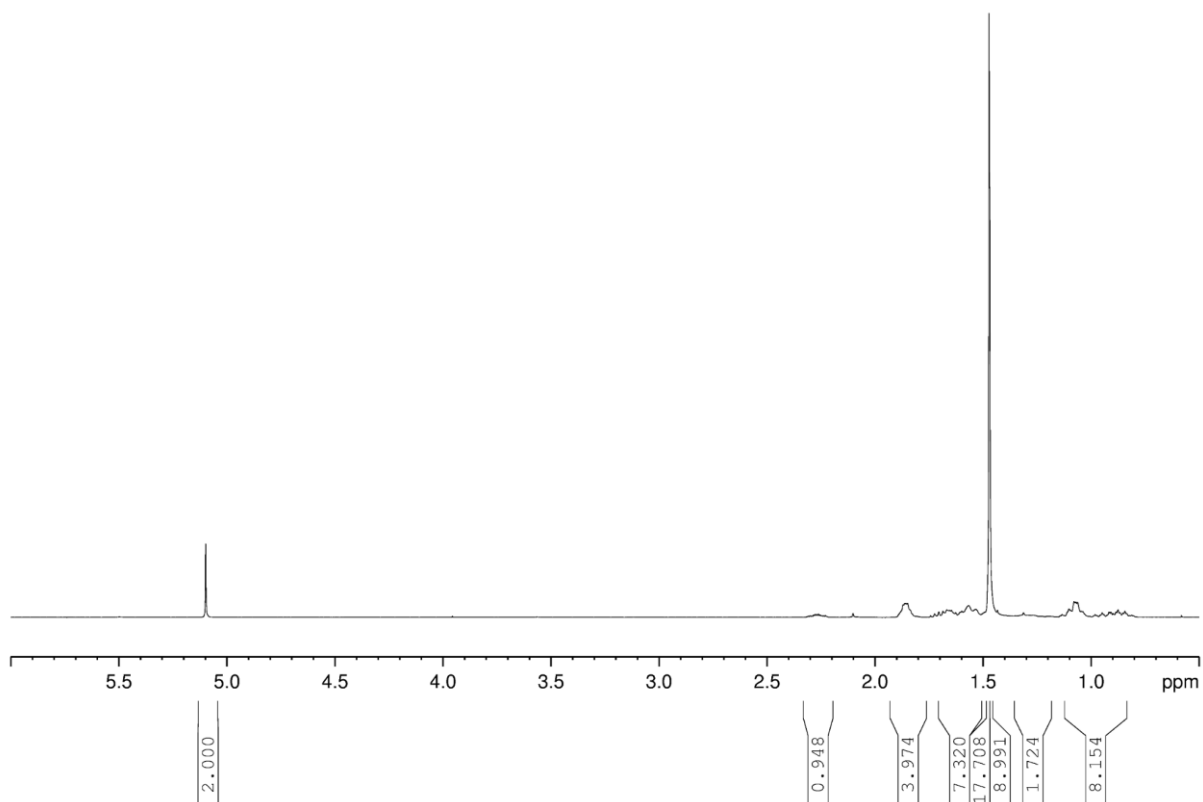

Figure S26: <sup>1</sup>H NMR spectrum of 9b in C<sub>6</sub>D<sub>6</sub> at room temperature.

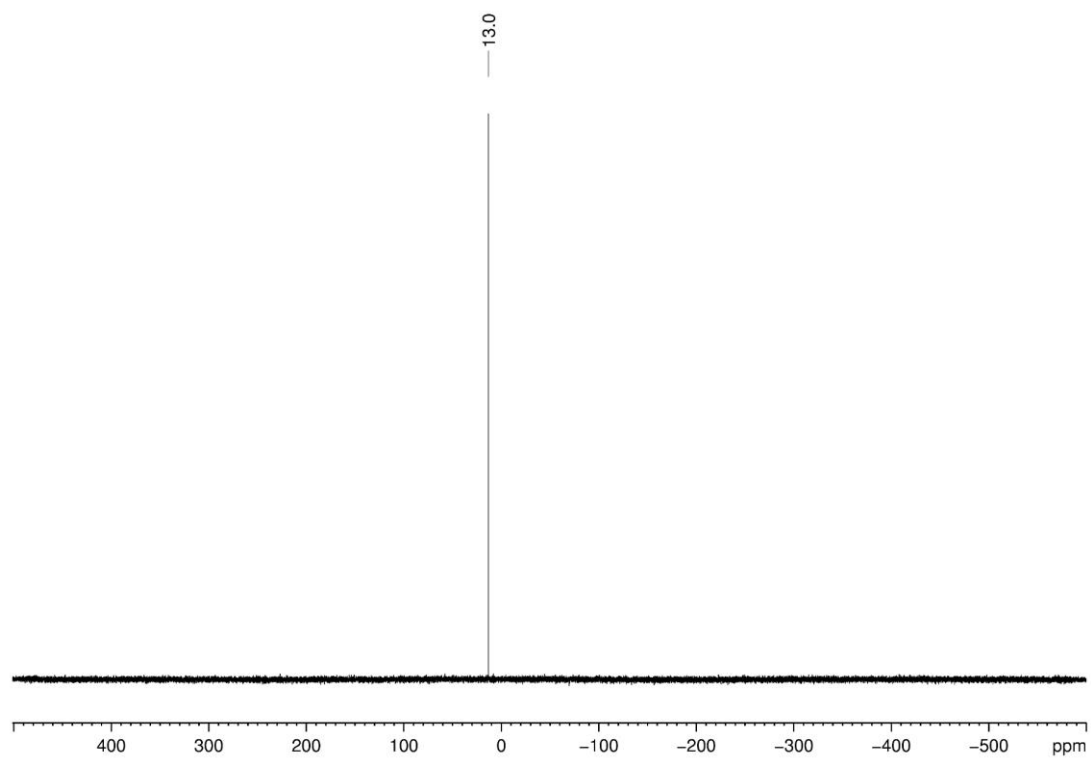

Figure S27: <sup>31</sup>P{<sup>1</sup>H} NMR spectrum of 9b in C<sub>6</sub>D<sub>6</sub> at room temperature.

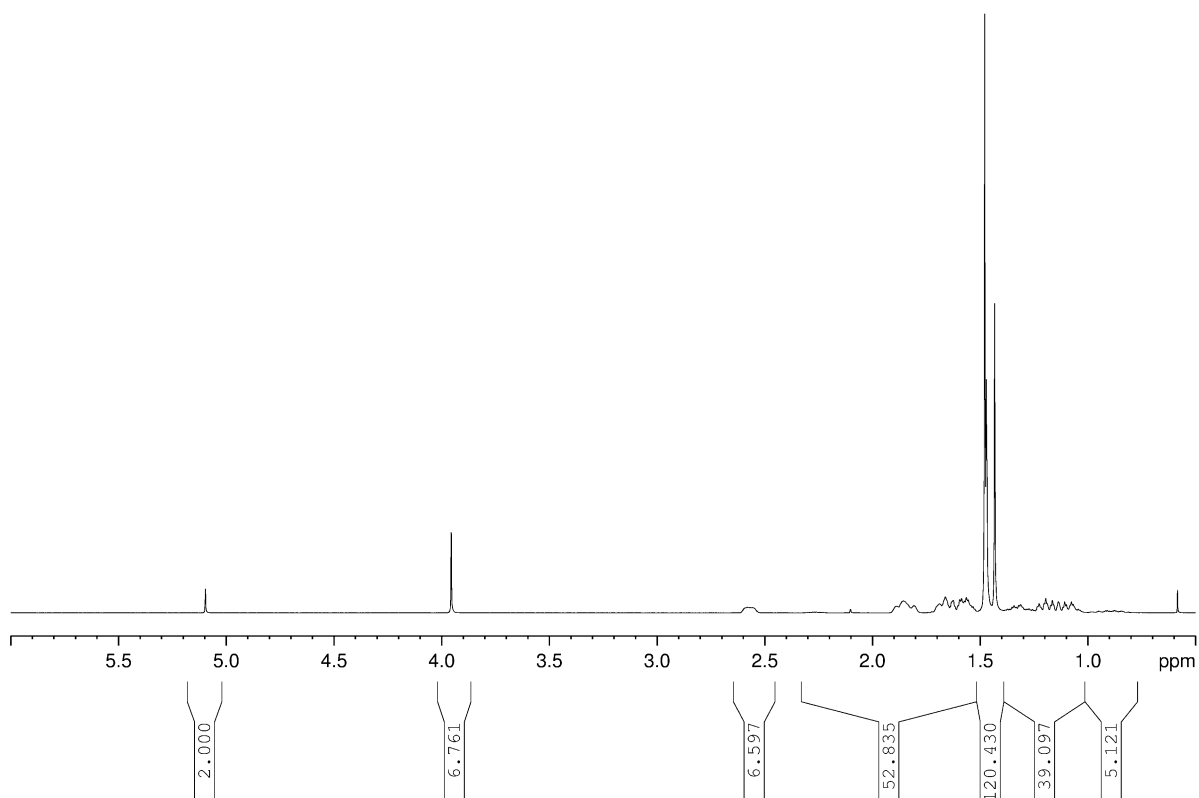

**Figure S28:**  $^1\text{H}$  NMR spectrum of a mixture of **9b** and **10b** (1:3) in  $\text{C}_6\text{D}_6$  at room temperature.

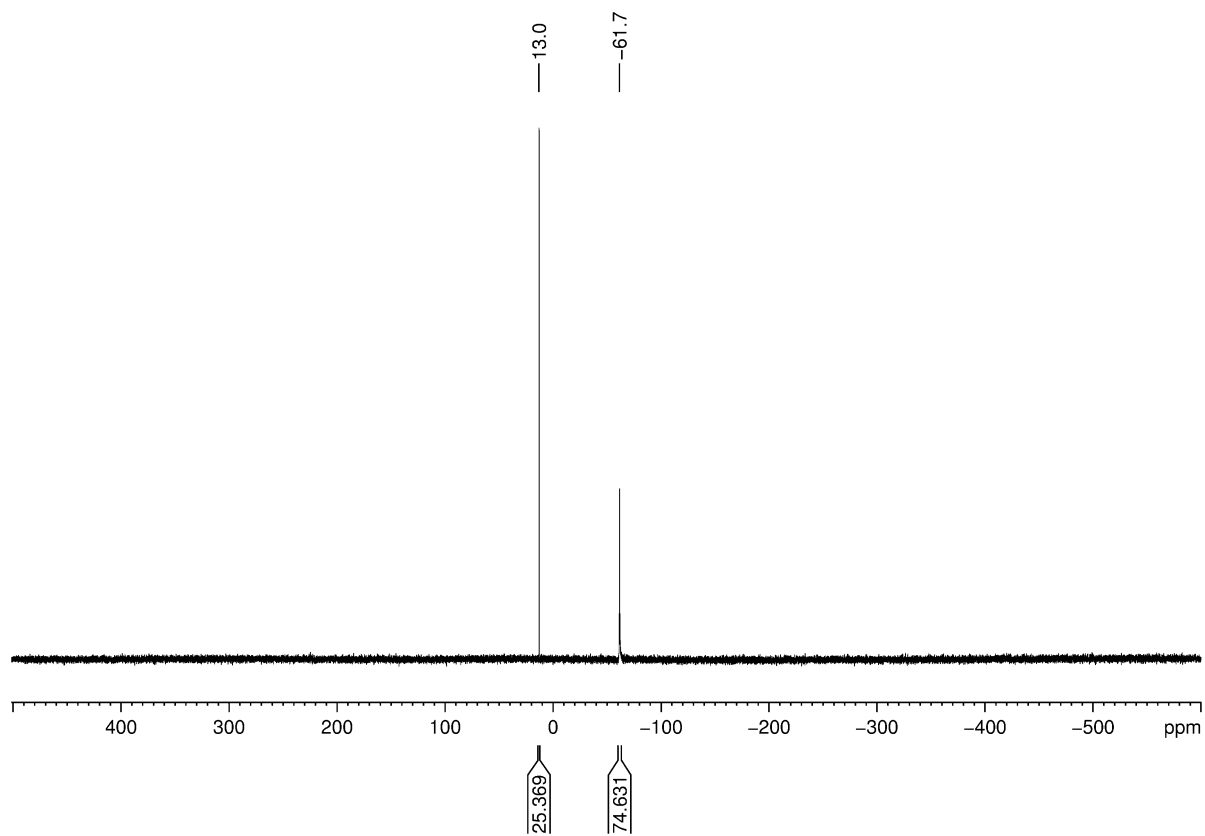

**Figure S29:**  $^{31}\text{P}\{^1\text{H}\}$  NMR spectrum of a mixture of **9b** and **10b** (1:3) in  $\text{C}_6\text{D}_6$  at room temperature.

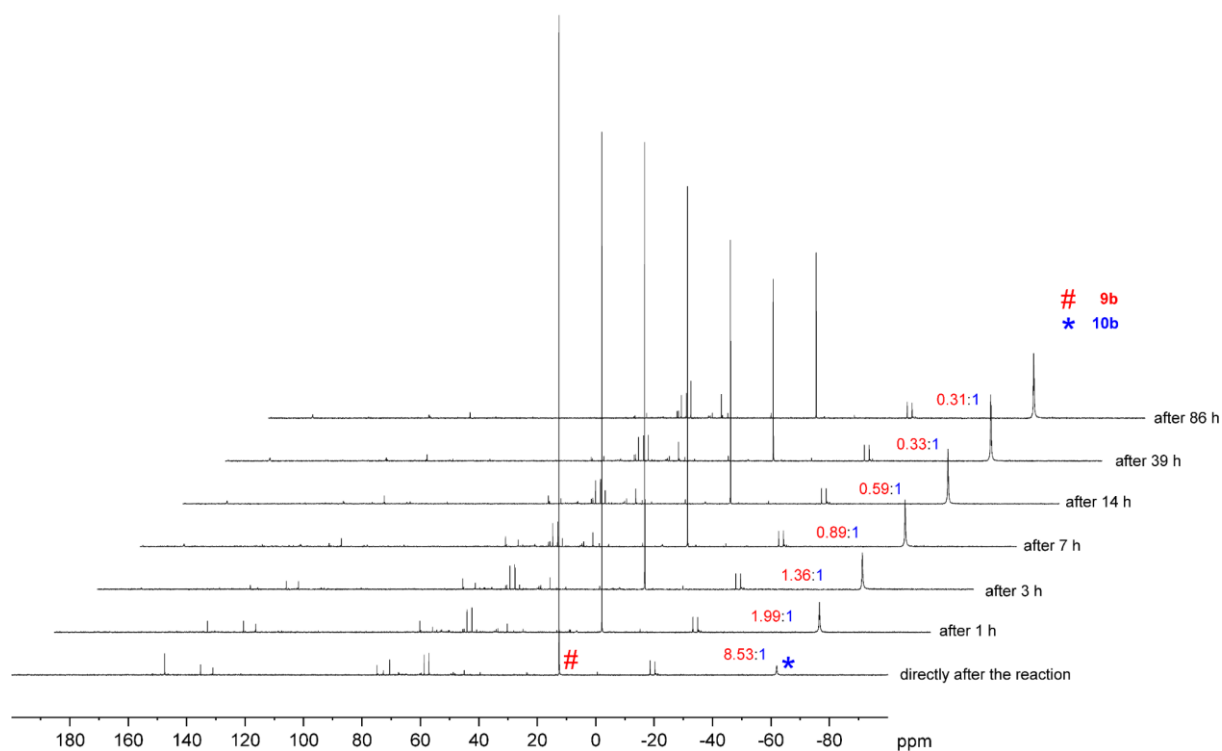

**Figure S30:**  $^{31}\text{P}\{^1\text{H}\}$  NMR spectra of the reaction of  $[\text{K}(\text{thf})_{0.8}][\mathbf{6}]$  with  $\text{Cy}_2\text{PCI}$  in toluene- $d_8$  before thermolysis and after 1, 3, 7, 14, 39 and 86 h at 60 °C.

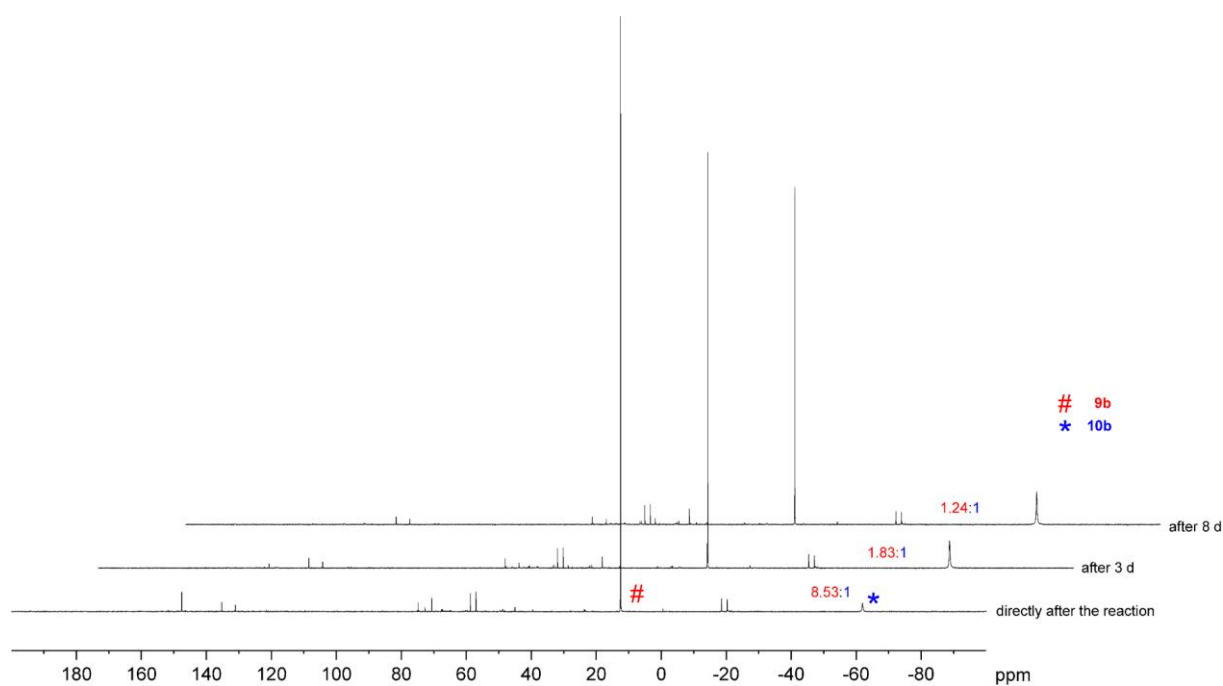

**Figure S31:**  $^{31}\text{P}\{^1\text{H}\}$  NMR spectra of the reaction of  $[\text{K}(\text{thf})_{0.8}][\mathbf{6}]$  with  $\text{Cy}_2\text{PCI}$  in toluene- $d_8$  at room temperature directly after the reaction and after 3 and 8 days.

## 2.16 [Cp''Co( $\eta^3$ -As<sub>3</sub>P<sup>t</sup>Bu<sub>2</sub>)] (9c)

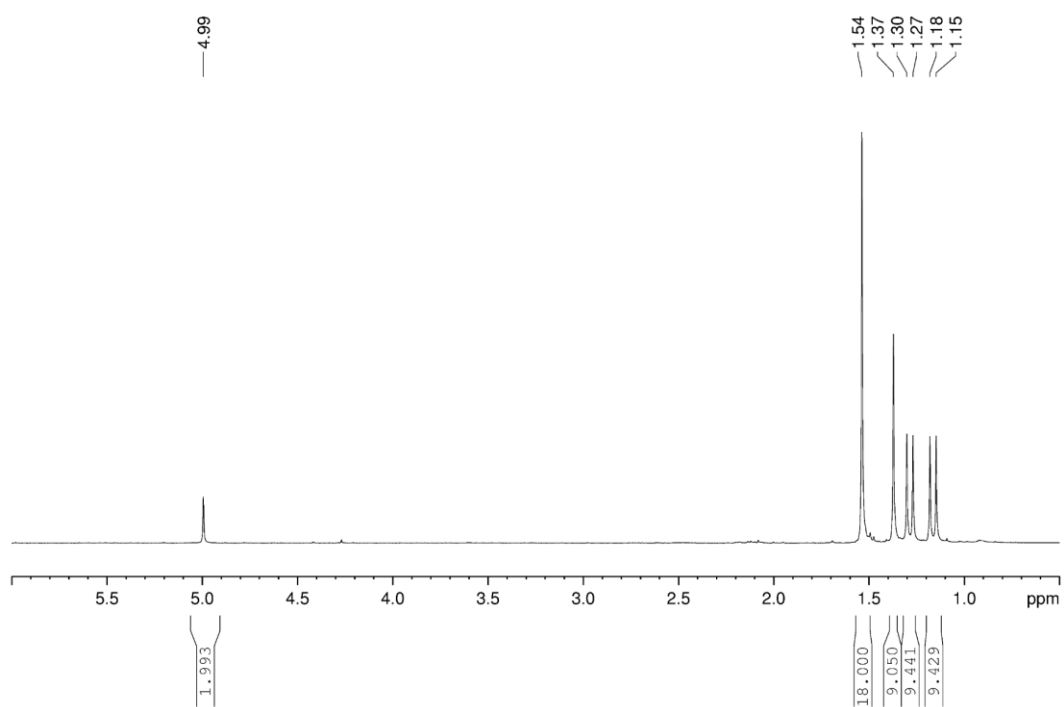

Figure S32: <sup>1</sup>H NMR spectrum of **9c** in C<sub>6</sub>D<sub>6</sub> at room temperature.

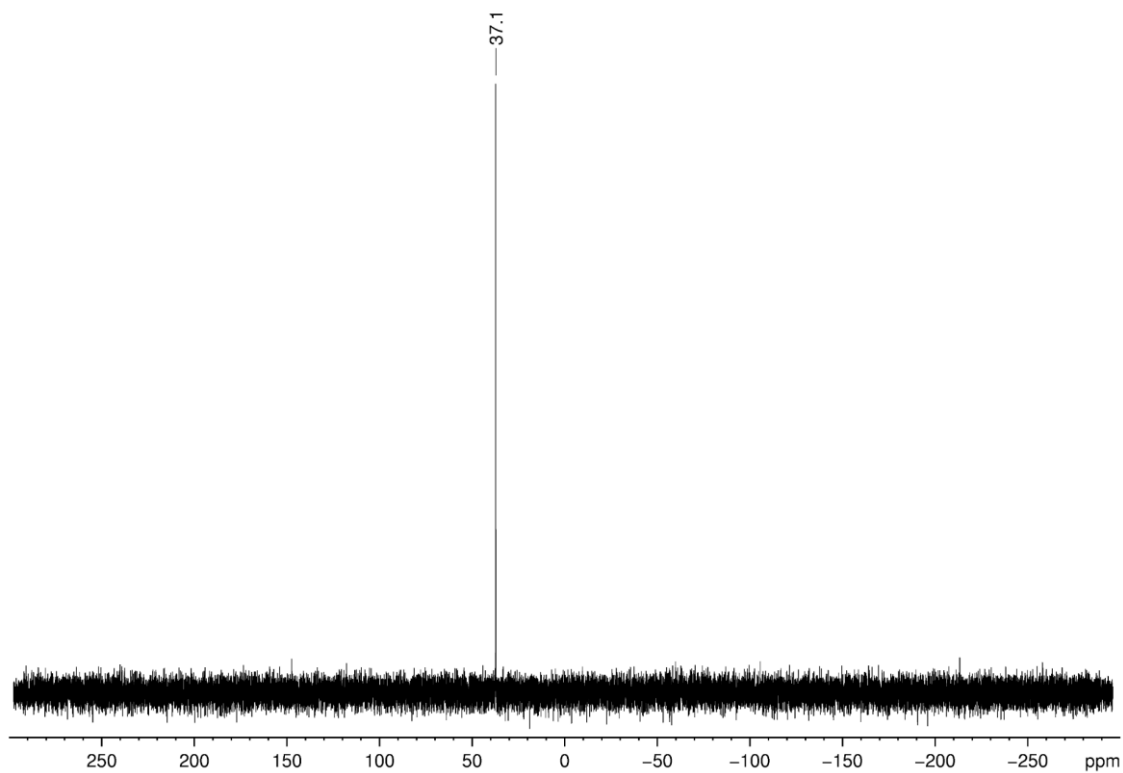

Figure S33: <sup>31</sup>P{<sup>1</sup>H} NMR spectrum of **9c** in C<sub>6</sub>D<sub>6</sub> at room temperature.



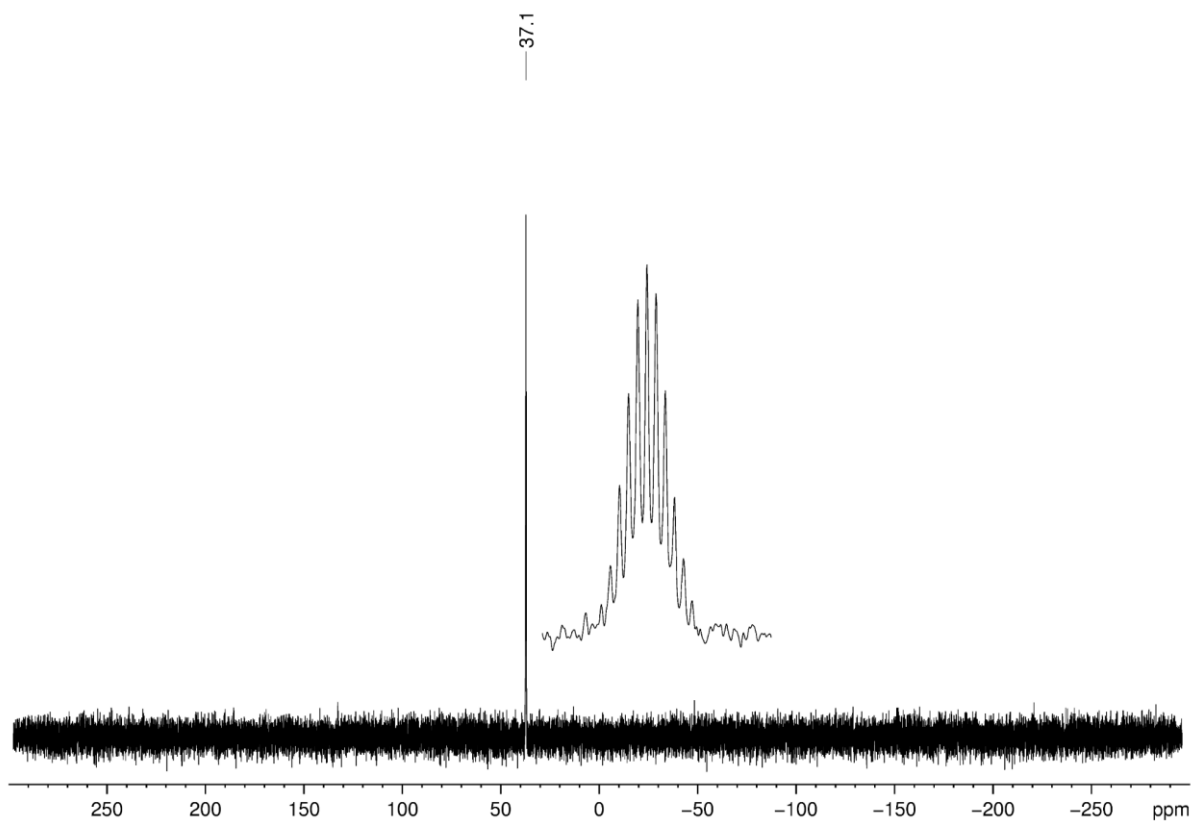

**Figure S34:**  $^{31}\text{P}$  NMR spectrum of **9c** in  $\text{C}_6\text{D}_6$  at room temperature.

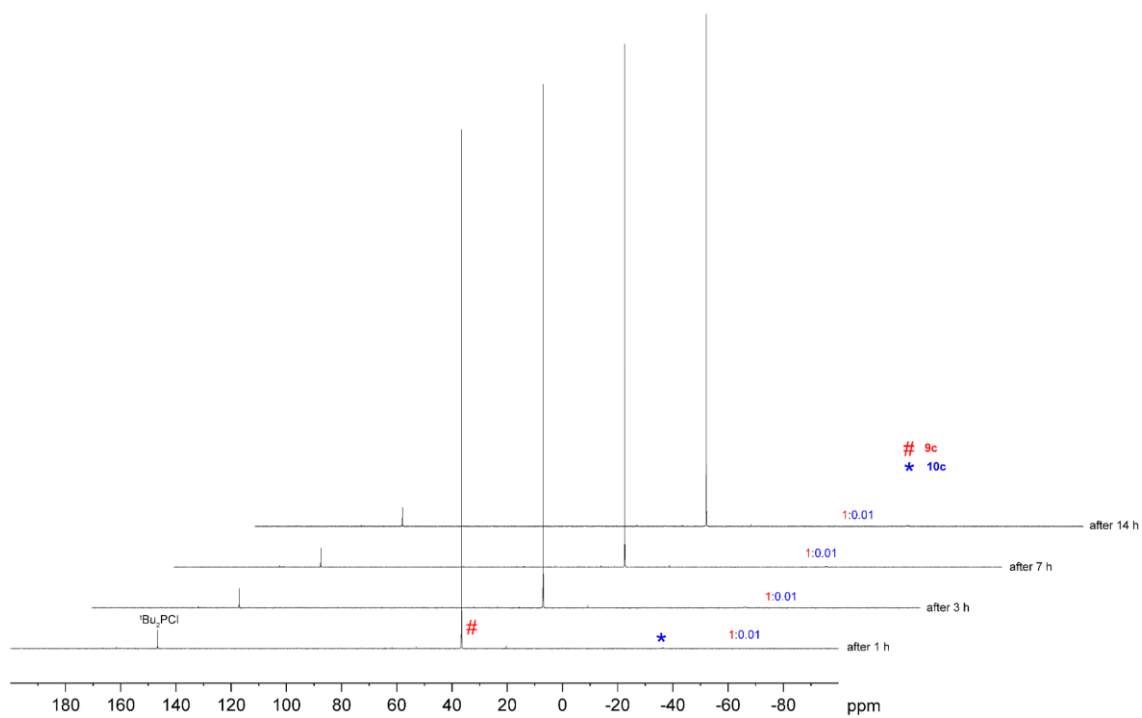

**Figure S35:**  $^{31}\text{P}\{^1\text{H}\}$  NMR spectra of the reaction of  $[\text{K}(\text{thf})_{0.8}][\mathbf{6}]$  with  $^t\text{Bu}_2\text{PCl}$  in  $\text{toluene-d}_8$  after 1, 3, 7 and 14 h at  $60\text{ }^\circ\text{C}$ .

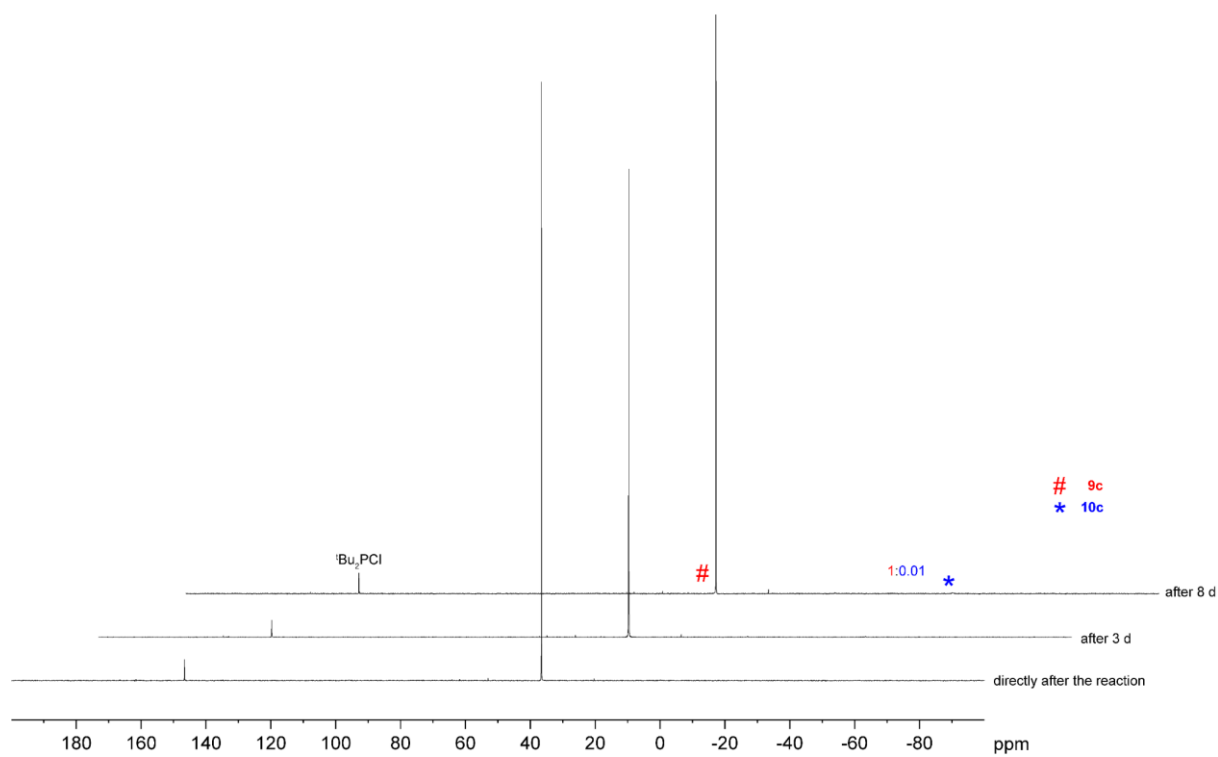

**Figure S36:**  $^{31}\text{P}\{^1\text{H}\}$  NMR spectra of the reaction of  $[\text{K}(\text{thf})_{0.8}][\mathbf{6}]$  with  $^t\text{Bu}_2\text{PCl}$  in toluene- $d_8$  at room temperature directly after the reaction and after 3 and 8 days.

## 2.17 [Cp<sup>'''</sup>Co(η<sup>3</sup>-P<sub>3</sub>SiL)] (L = (tBuN)<sub>2</sub>CPh) (11)

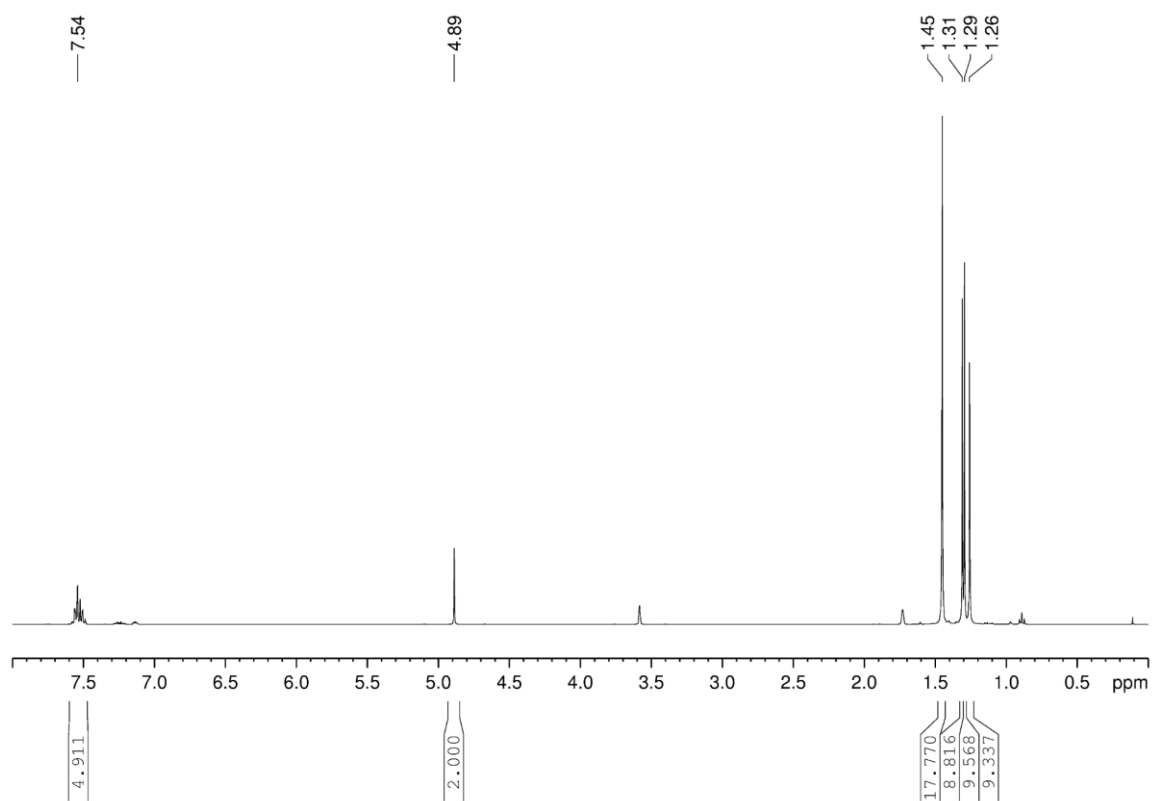

Figure S37: <sup>1</sup>H NMR spectrum of 11 in thf-d<sub>8</sub> at room temperature.

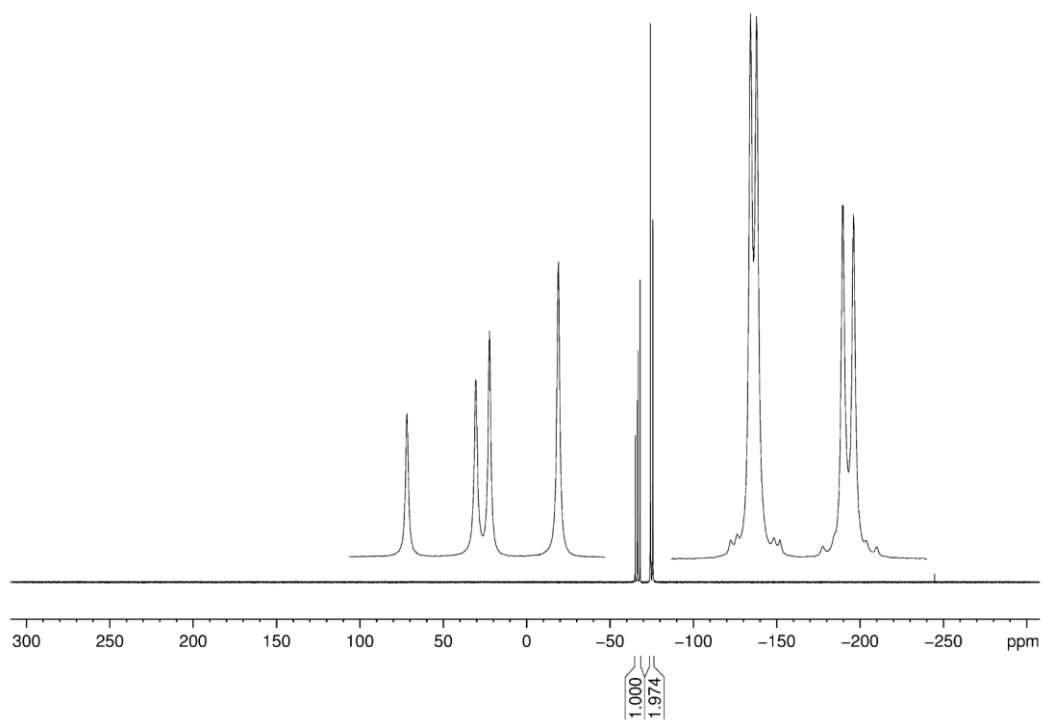

Figure S38: <sup>31</sup>P{<sup>1</sup>H} NMR spectrum of 11 in thf-d<sub>8</sub> at room temperature.

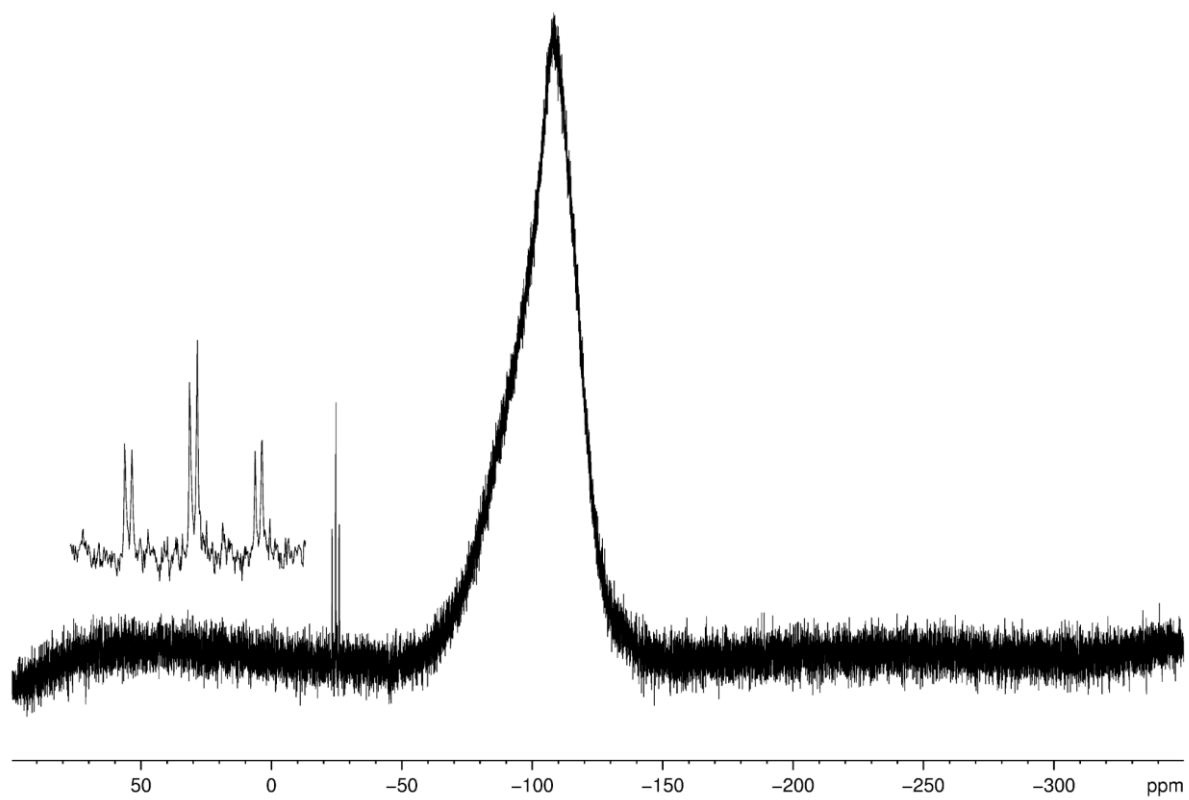

**Figure S39:**  $^{29}\text{Si}\{^1\text{H}\}$  NMR spectrum of **11** in  $\text{thf-d}_8$  at room temperature.

2.18 [Cp<sup>'''</sup>Co( $\eta^3$ -As<sub>3</sub>SiL)] (L = (tBuN)<sub>2</sub>CPh) (**12**)

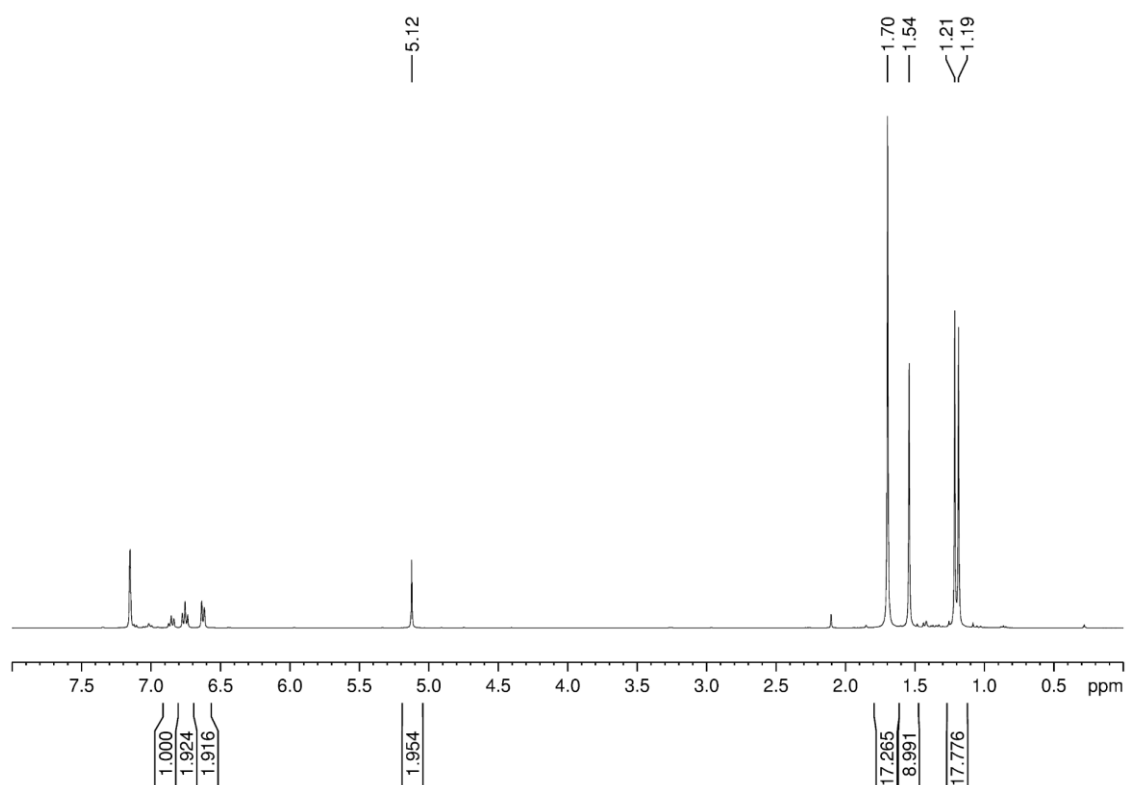

Figure S40: <sup>1</sup>H NMR spectrum of **12** in C<sub>6</sub>D<sub>6</sub> at room temperature.

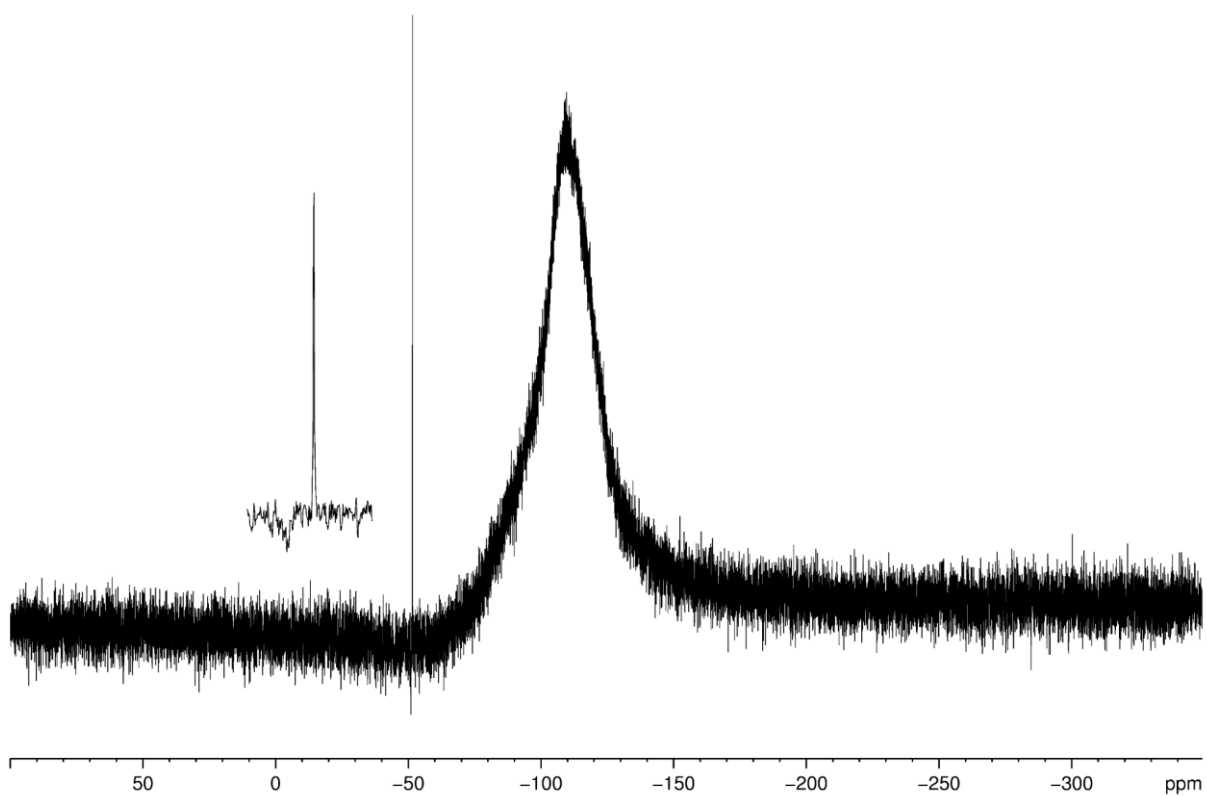

Figure S41: <sup>29</sup>Si{<sup>1</sup>H} NMR spectrum of **12** in C<sub>6</sub>D<sub>6</sub> at room temperature.

## 2.19 [Cp<sup>'''</sup>Co(η<sup>2</sup>:η<sup>1</sup>-As<sub>3</sub>P<sub>2</sub>Ph<sub>4</sub>)] [TEF] (13)

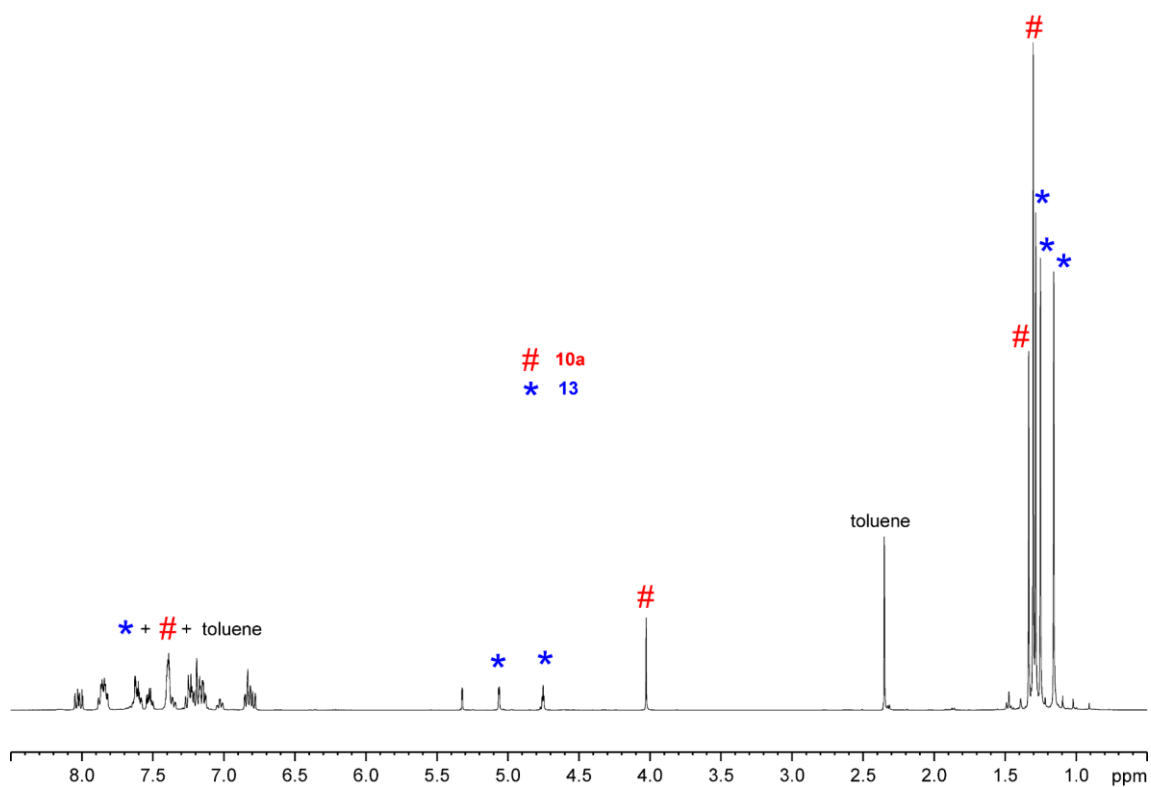

Figure S42: <sup>1</sup>H NMR spectrum of the reaction of **10a** with Ph<sub>2</sub>PCI/TI[TEF] in CD<sub>2</sub>Cl<sub>2</sub> at room temperature.

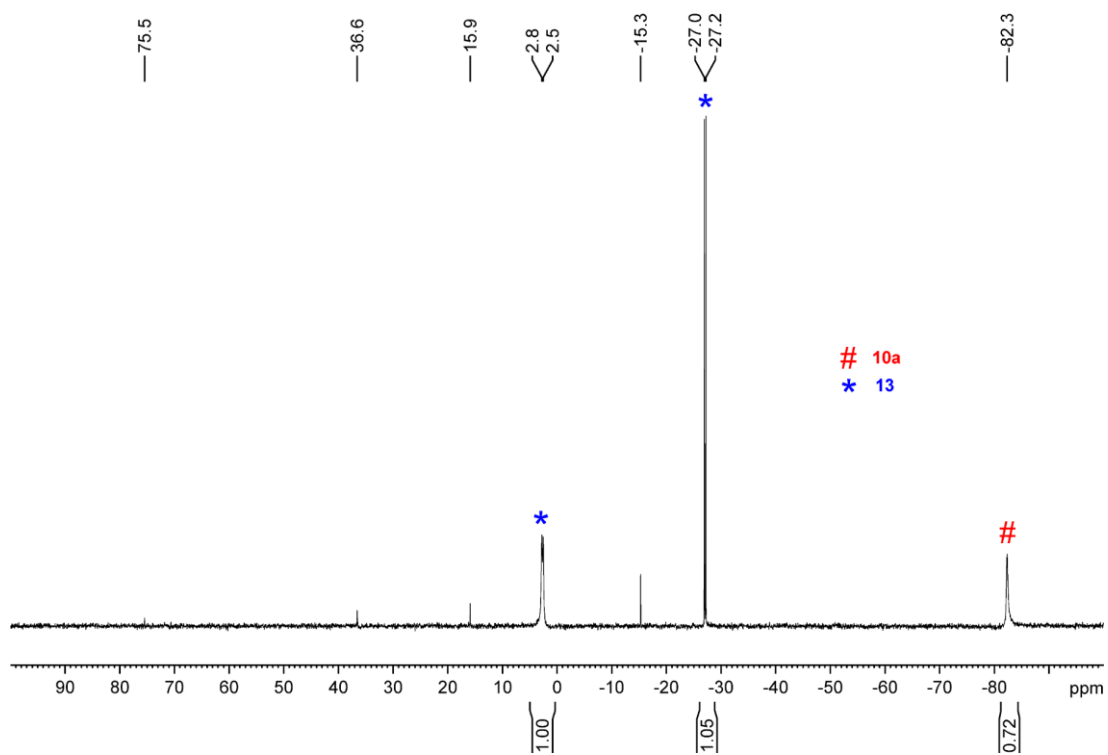

Figure S43: <sup>31</sup>P{<sup>1</sup>H} NMR spectrum of the reaction of **10a** with Ph<sub>2</sub>PCI/TI[TEF] in CD<sub>2</sub>Cl<sub>2</sub> at room temperature.

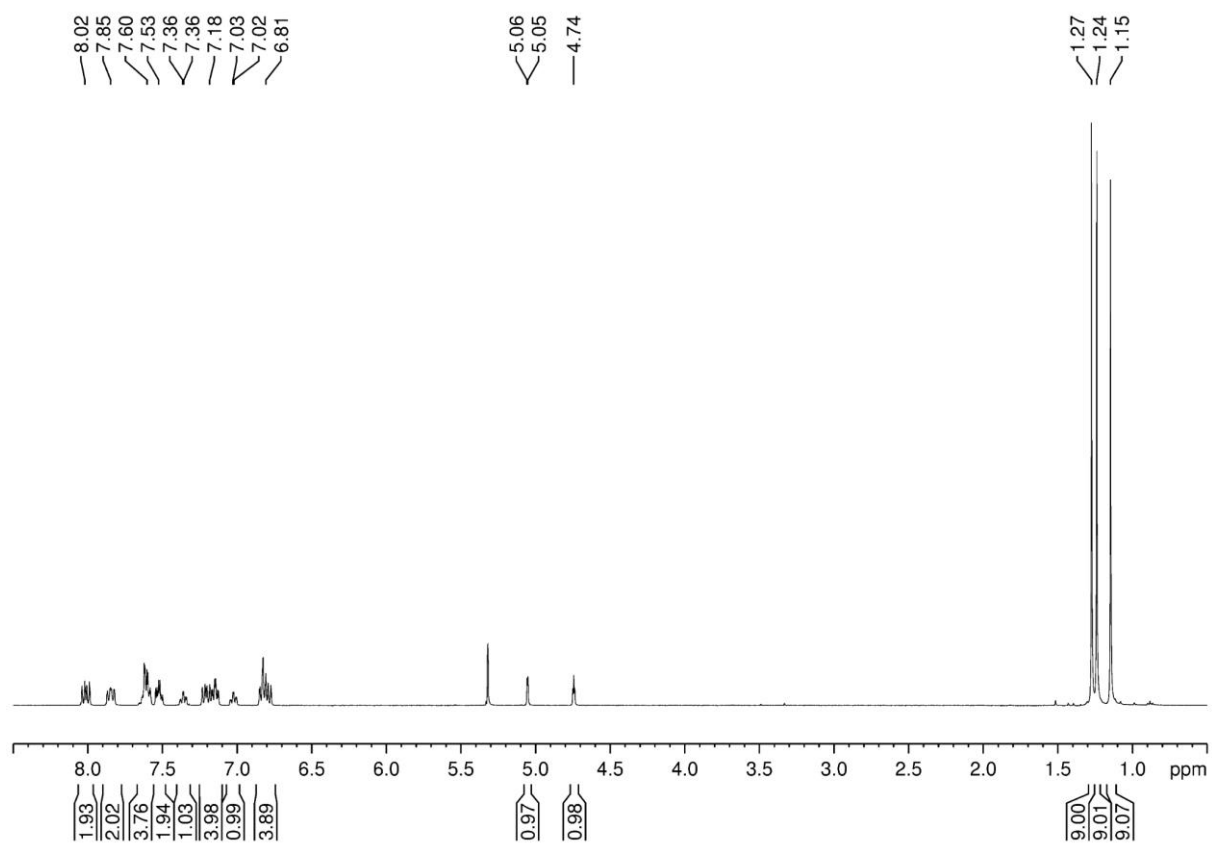

**Figure S44:**  $^1\text{H}$  NMR spectrum **14** in  $\text{CD}_2\text{Cl}_2$  at room temperature.

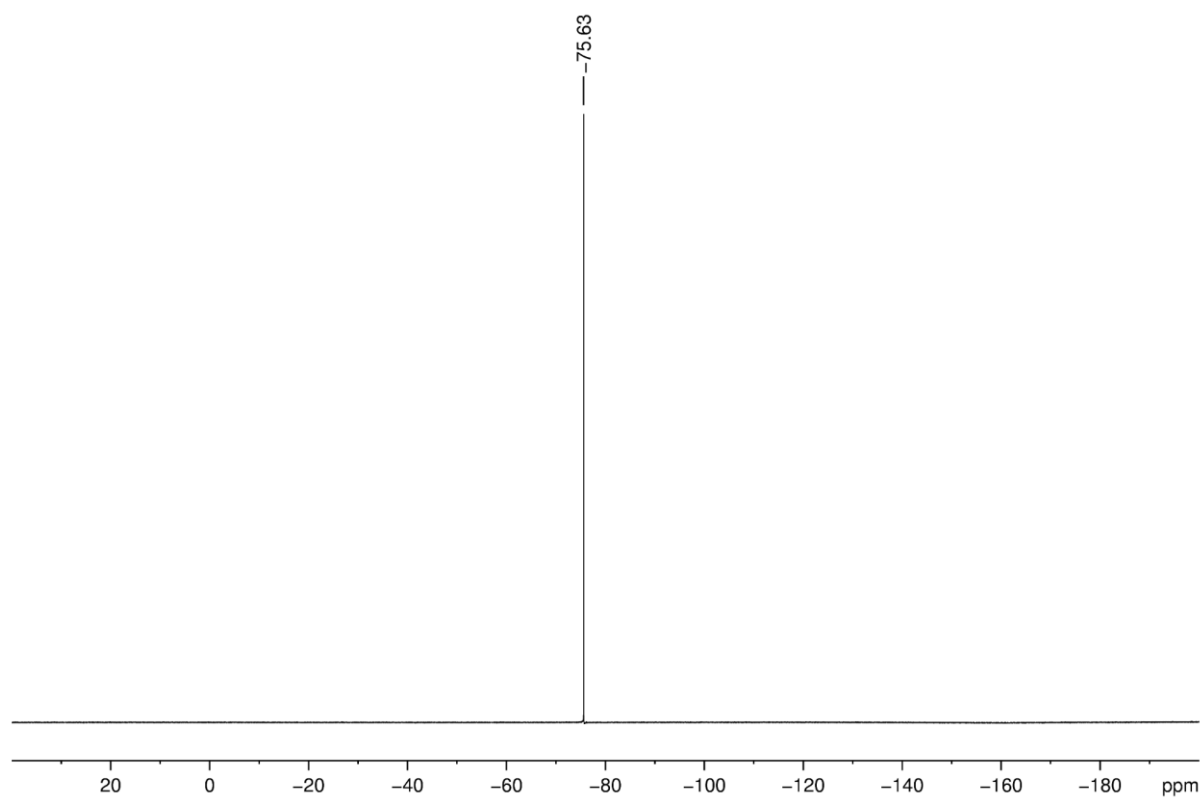

**Figure S45:**  $^{19}\text{F}\{^1\text{H}\}$  NMR spectrum **14** in  $\text{CD}_2\text{Cl}_2$  at room temperature.

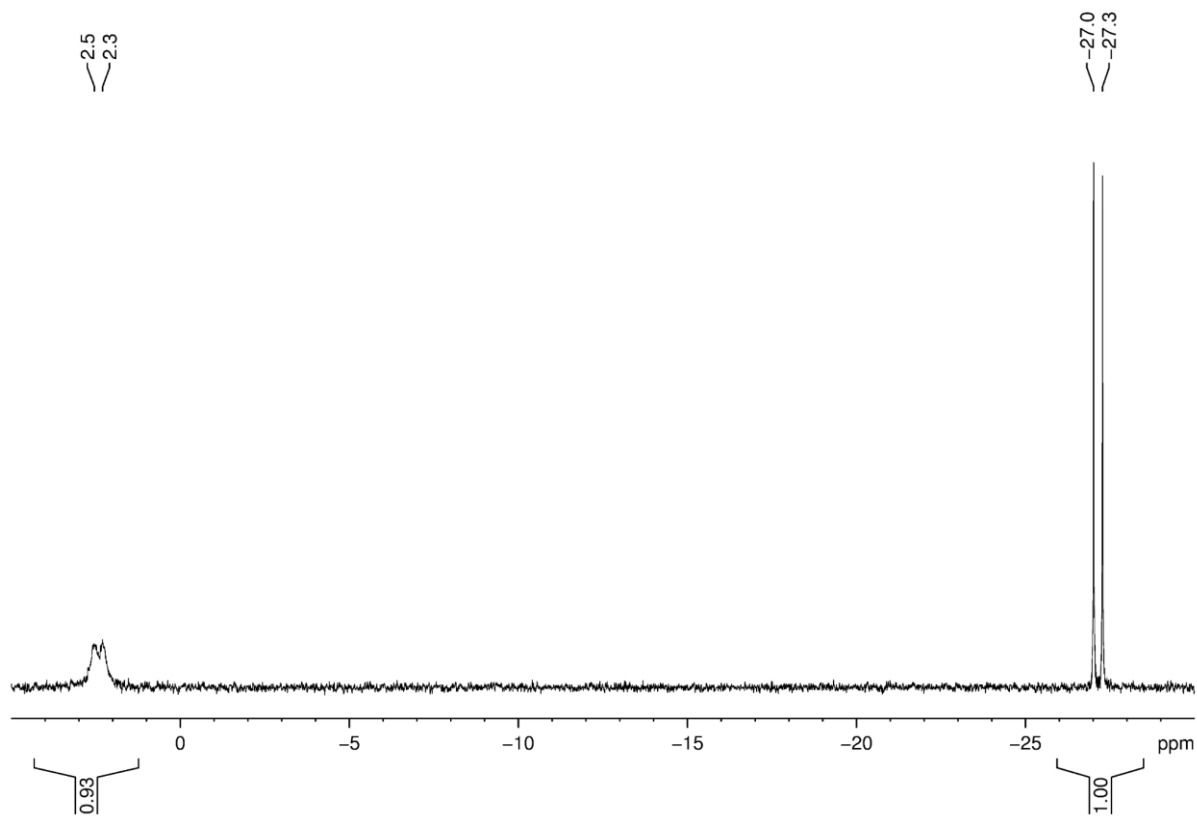

**Figure S46:** <sup>31</sup>P{<sup>1</sup>H} NMR spectrum **14** in CD<sub>2</sub>Cl<sub>2</sub> at room temperature.

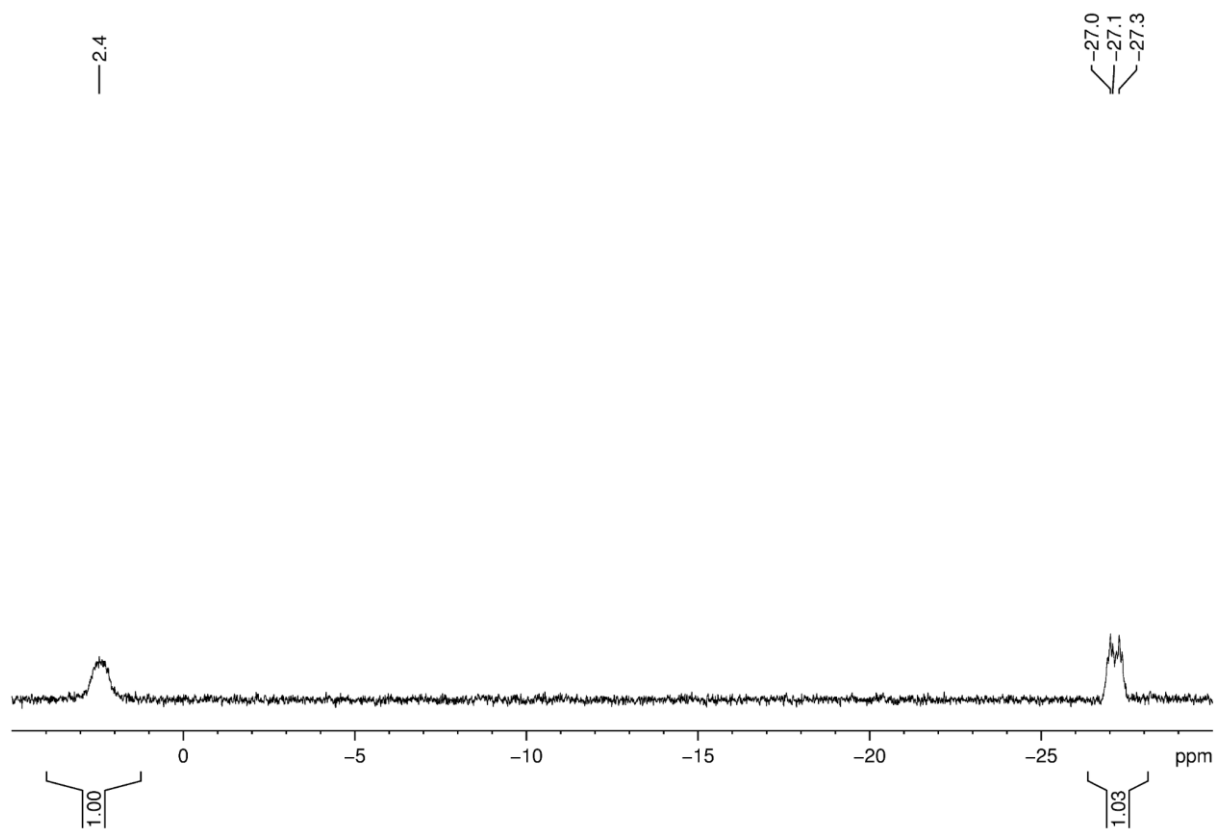

**Figure S47:** <sup>31</sup>P{<sup>1</sup>H} NMR spectrum **14** in CD<sub>2</sub>Cl<sub>2</sub> at room temperature.



### 3. Details on single crystal X-ray structure analysis

The X-ray diffraction experiments were performed on either a Gemini Ultra diffractometer (Oxford diffraction) with an AtlasS2 detector applying Cu-K $\alpha$  radiation ( $\lambda = 1.54178 \text{ \AA}$ ) ([K(18-c-6)]Cp''', [K(18-c-6)][**5**], [K(18-c-6)][**6**]), on a SuperNova, Dualflex diffractometer (Rigaku, formerly Agilent Technologies) with TitanS2 detector from applying Cu-K $\alpha$  radiation ( $\lambda = 1.54178 \text{ \AA}$ ) (**10a**) or on a XtaLAB Synergy R, DW system with HyPix-Arc 150 detector applying Cu-K $\alpha$  radiation ( $\lambda = 1.54178 \text{ \AA}$ ) (**7b**, **7c**, **8a**, **9b**, **9c**, **10b**, **11**, **12**, **13**). All measurements were performed at 123 K except **10b** and **11** (measured at 100 K). Data collection and reduction were performed with CrysAlispro (Version 171.38.46, 2015 (**5**), Version 171.40.14a, 2018 ([K(18-c-6)]Cp''', **6**), Version 171.41.81a, 2020 (**11**), Version 171.41.83a, 2020 (**7b**, **7c**, **8a**, **9b**, **9c**, **10a**, **10b**, **12**, **13**)). For the compounds (**5**, **11**) an analytical numeric absorption correction using a multifaceted crystal model based on expressions derived by R.C. Clark & J.S. Reid was applied.<sup>[5]</sup> For the compounds ([K(18-c-6)]Cp''', **6**, **7b**, **7c**, **8a**, **9b**, **9c**, **10a**, **10b**, **12**, **13**) a gaussian absorption correction based on gaussian integration over a multifaceted crystal model was applied. All structures were solved by direct methods with ShelXT<sup>[6]</sup> and Olex2<sup>[7]</sup> and refined by full-matrix least-squares method against  $F^2$  in anisotropic approximation using ShelXL<sup>[6]</sup>. All non-hydrogen atoms were refined anisotropically. Hydrogen atoms were refined in calculated positions using riding on pivot atom model.

CCDC-2068519 ([K(18-c-6)]Cp'''), CCDC-2068508 (**5**), CCDC-2068509 (**6**), CCDC-2068510 (**7b**), CCDC-2068511 (**7c**), CCDC-2068512 (**8a**), CCDC-2068513 (**9b**), CCDC-2068514 (**9c**), CCDC-2068515 (**10a**), CCDC-2068516 (**10b**), CCDC-2068517 (**11**), CCDC-2068518 (**12**) and CCDC-2069835 (**13**) contain the supplementary crystallographic data for this paper. These data can be obtained free of charge at [www.ccdc.cam.ac.uk/conts/retrieving.html](http://www.ccdc.cam.ac.uk/conts/retrieving.html) (or from the Cambridge Crystallographic Data Centre, 12 Union Road, Cambridge CB2 1EZ, UK; Fax: +44-1223-336-033; e-mail: [deposit@ccdc.cam.ac.uk](mailto:deposit@ccdc.cam.ac.uk)).

### 3.1 [K(18-c-6)]Cp'''

[K(18-c-6)]Cp''' crystallizes from a concentrated solution in thf layered with *n*-hexane at room temperature in the monoclinic space group  $P2_1/n$  as colorless blocks. The asymmetric units contains one molecule [K(18-c-6)]Cp'''. The structure in the solid state is depicted in Figure S48.

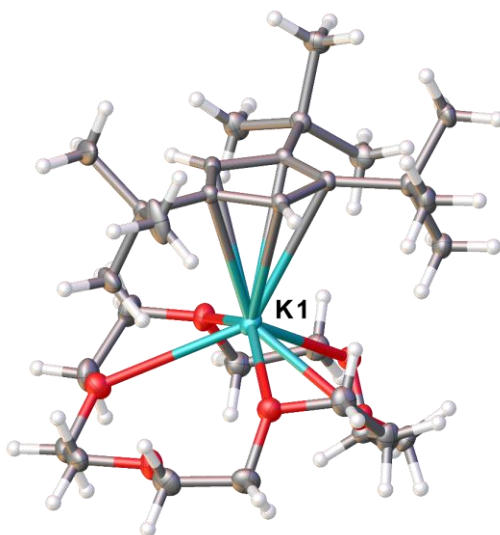

**Figure S48:** Molecular structure of [K(18-c-6)]Cp''' in the solid state. Thermal ellipsoids are drawn with 50 % probability level.

### 3.2 [K(18-c-6)][Cp<sup>'''</sup>Co( $\eta^3$ -P<sub>3</sub>)] ([K(18-c-6)][5])

Compound [K(18-c-6)][5] crystallizes from a concentrated solution in thf layered with *n*-hexane at room temperature in the monoclinic space group *C2/c* as light red plates. The asymmetric unit contains one anion [5], one [K(18-c-6)] counterion and one molecule thf. The thf molecule is disordered over two positions with side occupancies of 23 and 77 %. The restraints SADI, SIMU and RIGU were applied to describe the disorder properly. The structure in solid state is depicted in Figure S49 and S50.

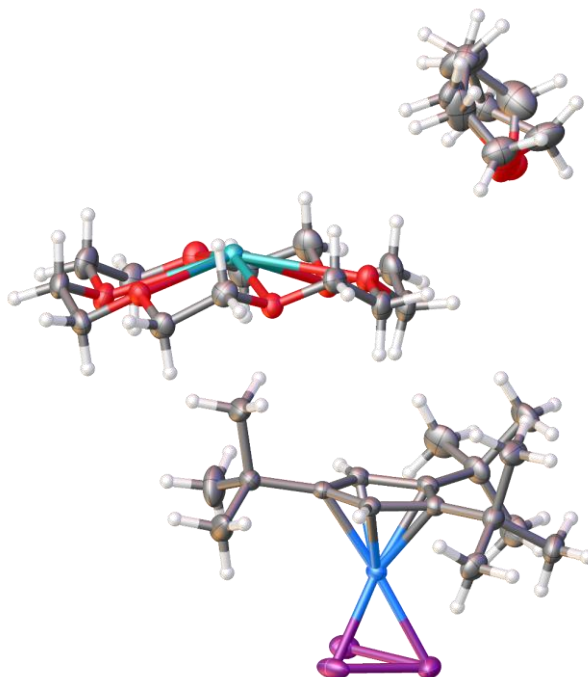

**Figure S49:** Molecular structure of [K(18-c-6)][5] in the solid state. Thermal ellipsoids are drawn with 50 % probability level.

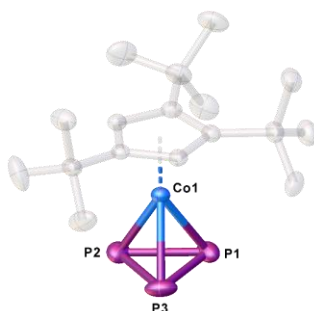

**Figure S50:** Molecular structure of the anion [5] in the solid state. Hydrogen atoms are omitted for clarity. Thermal ellipsoids are drawn with 50 % probability level. Selected bond lengths [Å] and angles [°]: P1-P2 2.1587(7), P2-P3 2.1640(7), P1-P3 2.1561(7), P1-P2-P3 59.84(2), P1-P3-P2 59.96(2), P2-P1-P3 60.20(2).

### 3.3 [K(18-c-6)][Cp<sup>'''</sup>Co( $\eta^3$ -As<sub>3</sub>)] ([K(18-c-6)][6])

Compound [K(18-c-6)][6] crystallizes from a concentrated solution in thf layered with *n*-hexane at room temperature in the monoclinic space group *C2/c* as dark brown plates. The asymmetric unit contains one anion [6], one [K(18-c-6)] counterion and one molecule thf. The structure in solid state is depicted in Figure S51 and S52.

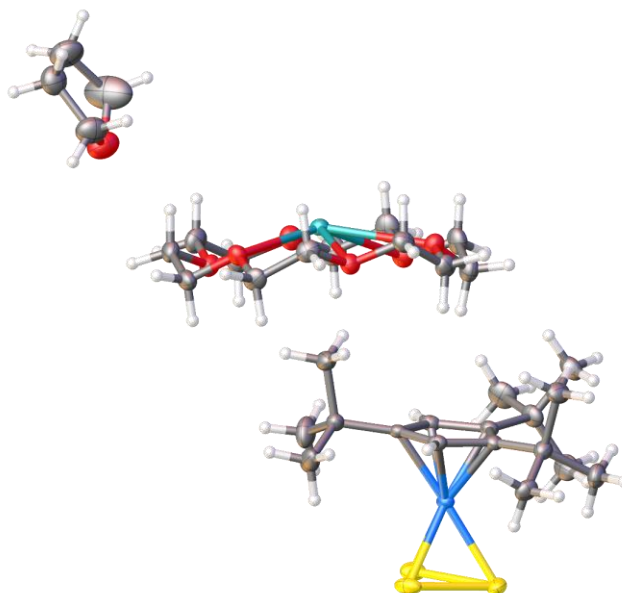

**Figure S51:** Molecular structure of [K(18-c-6)][6] in the solid state. Thermal ellipsoids are drawn with 50 % probability level.

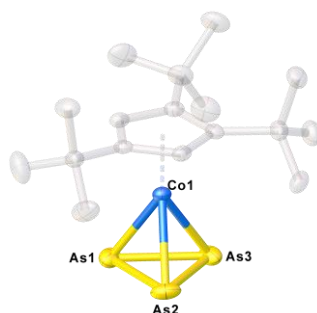

**Figure S52:** Molecular structure of the anion [6] in the solid state. Hydrogen atoms are omitted for clarity. Thermal ellipsoids are drawn with 50 % probability level. Selected bond lengths [ $\text{\AA}$ ] and angles [ $^\circ$ ]: As1-As2 2.3969(4), As2-As3 2.3876(4), As1-As3 2.3892(4), As1-As2-As3 59.914(13), As1-As3-As2 60.235(13), As2-As1-As3 59.851(13).

### 3.4 [Cp<sup>'''</sup>Co(η<sup>3</sup>-P<sub>4</sub>Cy<sub>2</sub>)] (7b)

Compound **7b** crystallizes from a concentrated solution in toluene layered with MeCN at -30 °C in the triclinic space group  $P\bar{1}$  as dark red blocks. The asymmetric unit contains one molecule **7b**. The structure in solid state is depicted in Figure S53 and S54.

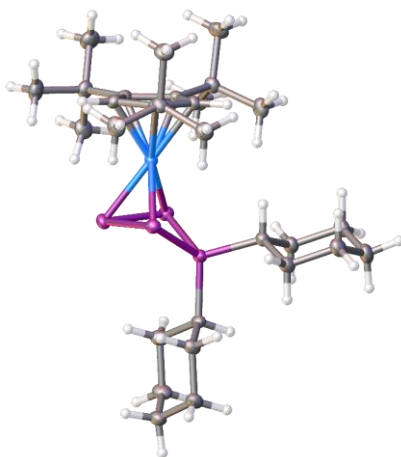

**Figure S53:** Molecular structure of **7b** in the solid state. Thermal ellipsoids are drawn with 50 % probability level.

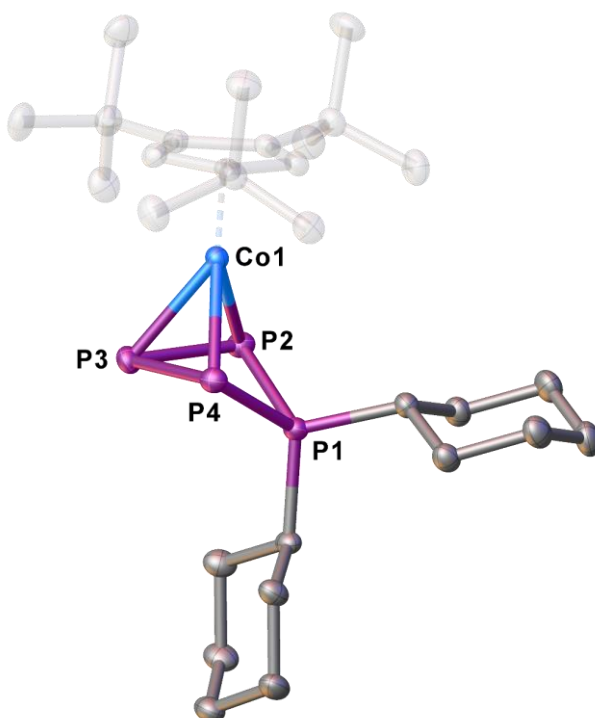

**Figure S54:** Molecular structure of **7b** in the solid state. Hydrogen atoms are omitted for clarity. Thermal ellipsoids are drawn with 50 % probability level. Selected bond lengths [Å] and angles [°]: P1-P2 2.1583(5), P2-P3 2.2021(6), P3-P4 2.2029(6), P1-P4 2.1544(5), P2-P3-P4-P1 -29.432.

### 3.5 [Cp<sup>'''</sup>Co( $\eta^3$ -P<sub>4</sub><sup>t</sup>Bu<sub>2</sub>)] (7c)

Compound **7c** crystallizes from a concentrated solution in CH<sub>2</sub>Cl<sub>2</sub> layered with MeCN at room temperature in the monoclinic space group *P*2<sub>1</sub>/*c* as dark red blocks. The asymmetric unit contains two molecules of **7c**. The structure in solid state is depicted in Figure S55 and S56.

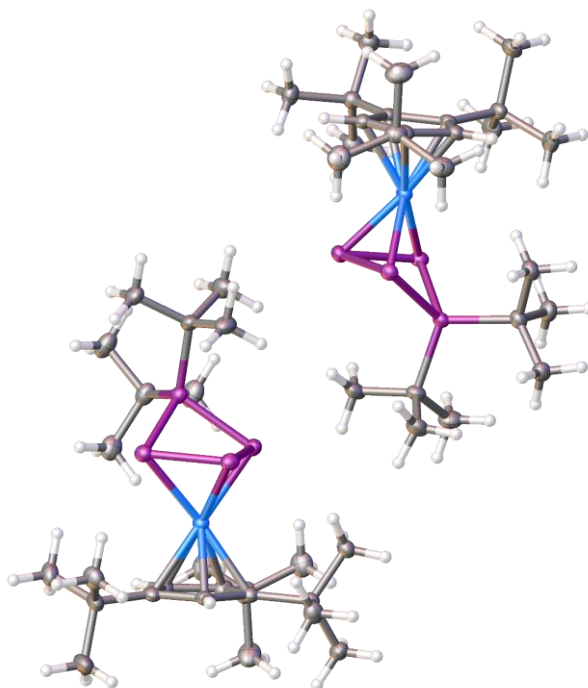

**Figure S55:** Molecular structure of **7c** in the solid state. Thermal ellipsoids are drawn with 50 % probability level.

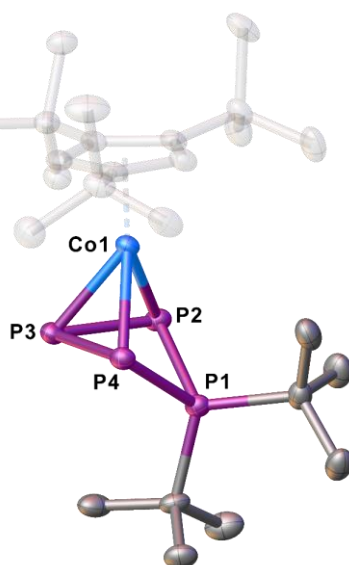

**Figure S56:** Molecular structure of one molecule **7c** in the solid state. Hydrogen atoms are omitted for clarity. Thermal ellipsoids are drawn with 50 % probability level. P5-P8 represent the second molecule. Selected bond lengths [ $\text{\AA}$ ] and angles [ $^\circ$ ]: P1-P2 2.1810(8), P2-P3 2.2023(8), P3-P4 2.2017(8), P1-P4 2.1756(8), P2-P3-P4-P1 -31.908. P5-P6 2.1790(8), P6-P7 2.2037(8), P7-P8 2.1991(9), P5-P8 2.1815(8), P6-P7-P8-P5 -32.519.

### 3.6 [Cp<sup>'''</sup>Co(η<sup>2</sup>:η<sup>1</sup>-P<sub>4</sub>Ph<sub>2</sub>)] (8a)

Compound **8a** crystallizes from a concentrated solution in toluene layered with MeCN at -30 °C in the orthorhombic space group *Pna*2<sub>1</sub> as light red plates. The asymmetric unit contains one molecule **8a**. The structure in solid state is depicted in Figure S57 and S58.

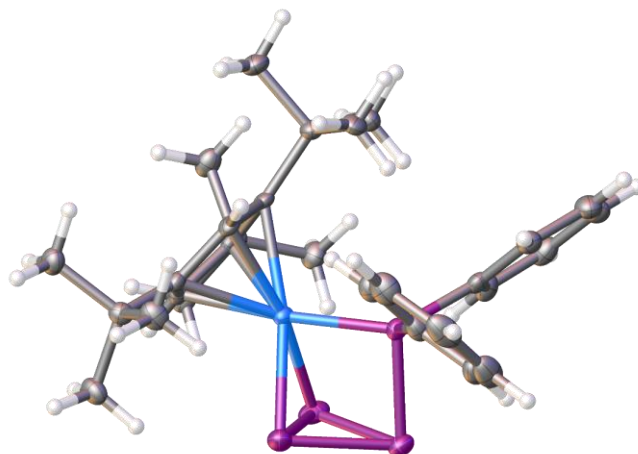

**Figure S57:** Molecular structure of **8a** in the solid state. Thermal ellipsoids are drawn with 50 % probability level.

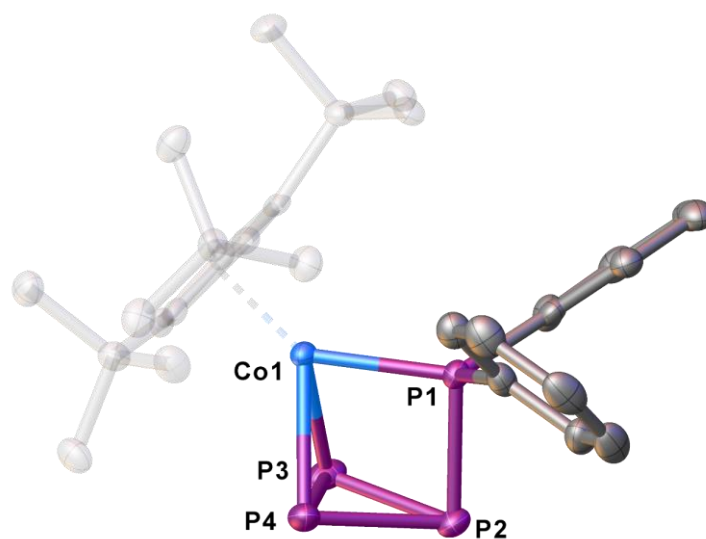

**Figure S58:** Molecular structure of one molecule **8a** in the solid state. Hydrogen atoms are omitted for clarity. Thermal ellipsoids are drawn with 50 % probability level. Selected bond lengths [Å] and angles [°]: P1-P2 2.1774(15), P2-P3 2.2309(15), P3-P4 2.1316(17), P2-P4 2.2372(15), P2-P3-P4-P1 52.103.

### 3.7 [Cp<sup>'''</sup>Co( $\eta^3$ -As<sub>3</sub>PCy<sub>2</sub>)] (**9b**)

Compound **9b** crystallizes from a concentrated solution in *o*-difluorobenzene layered with MeCN at room temperature in the monoclinic space group  $P2_1/n$  as dark brown blocks. The asymmetric unit contains one molecule **9b**. The structure in solid state is depicted in Figure S59 and S60.

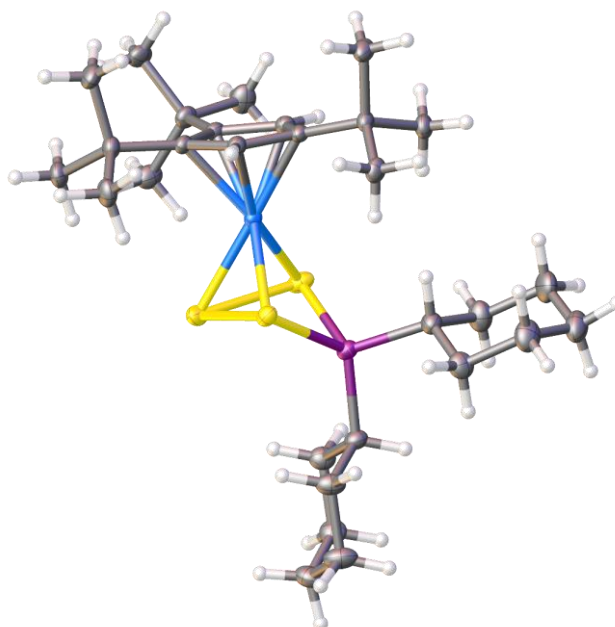

**Figure S59:** Molecular structure of **9b** in the solid state. Thermal ellipsoids are drawn with 50 % probability level.

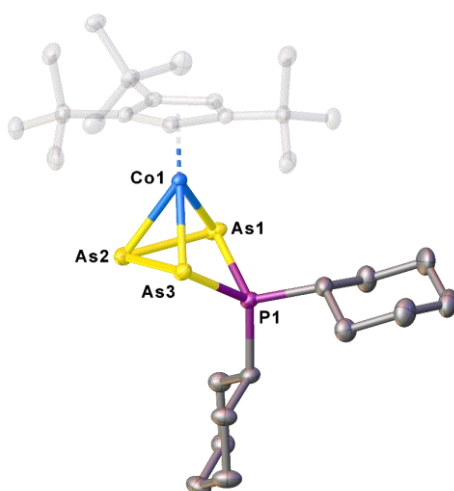

**Figure S60:** Molecular structure of **9b** in the solid state. Hydrogen atoms are omitted for clarity. Thermal ellipsoids are drawn with 50 % probability level. Selected bond lengths [ $\text{\AA}$ ] and angles [ $^\circ$ ]: P1-As1 2.2967(5), As1-As2 2.4381(3), As2-As3 2.4264(3), P1-As3 2.3002(5), As1-As2-As3-P1 -33.407.



### 3.8 [Cp<sup>'''</sup>Co(η<sup>3</sup>-As<sub>3</sub>P<sup>t</sup>Bu<sub>2</sub>)] (9c)

Compound **9c** crystallizes from a concentrated solution in CH<sub>2</sub>Cl<sub>2</sub> layered with MeCN at room temperature in the monoclinic space group *P*2<sub>1</sub>/*n* as dark red blocks. The asymmetric unit contains one molecule **9c**. The structure in solid state is depicted in Figure S61 and S62.

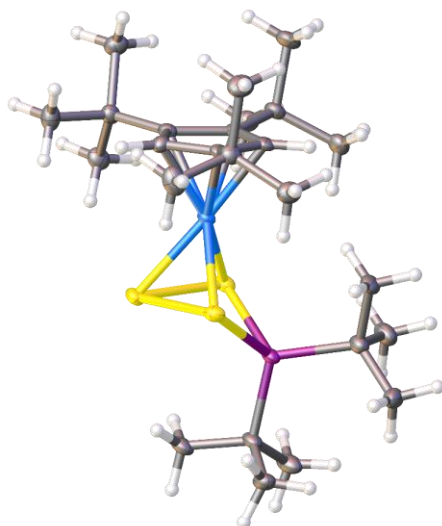

**Figure S61:** Molecular structure of **9c** in the solid state. Thermal ellipsoids are drawn with 50 % probability level.

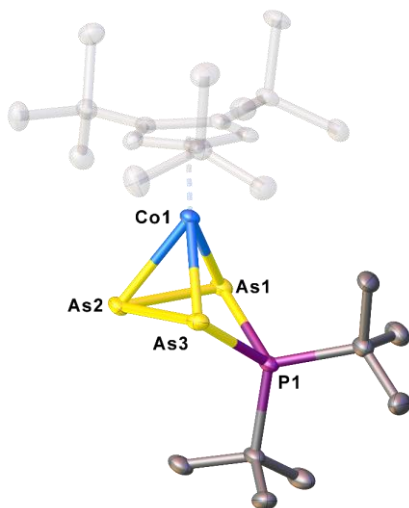

**Figure S62:** Molecular structure of **9c** in the solid state. Hydrogen atoms are omitted for clarity. Thermal ellipsoids are drawn with 50 % probability level. Selected bond lengths [Å] and angles [°]: P1-As1 2.3052(8), As1-As2 2.4404(4), As2-As3 2.4196(5), P1-As3 2.3113(7), As1-As2-As3-P1 -31.994.

### 3.9 [Cp<sup>'''</sup>Co(η<sup>2</sup>:η<sup>1</sup>-As<sub>3</sub>PPh<sub>2</sub>)] (10a)

Compound **10a** crystallizes from a concentrated solution in toluene layered with MeCN at -30 °C in the triclinic space group  $P\bar{1}$  as dark brown blocks. The asymmetric unit contains one molecule **10a**. The structure in solid state is depicted in Figure S63 and S64.

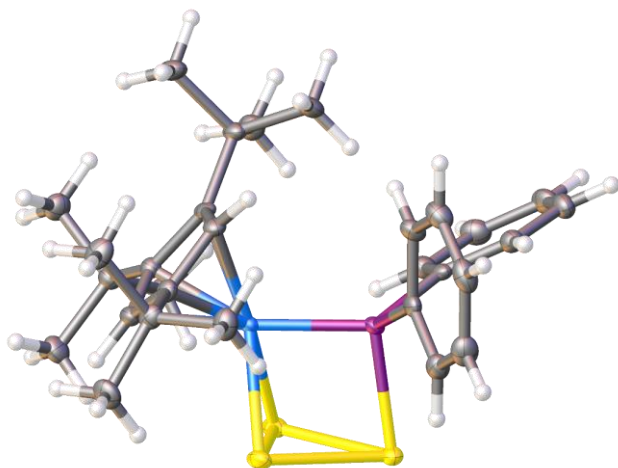

**Figure S63:** Molecular structure of **10a** in the solid state. Thermal ellipsoids are drawn with 50 % probability level.

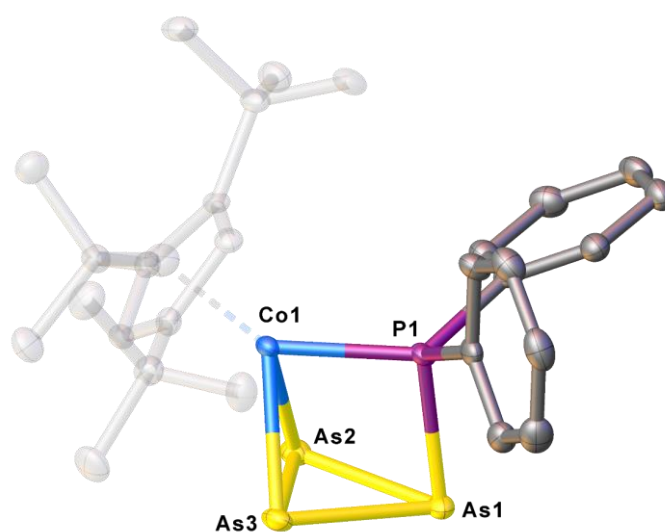

**Figure S64:** Molecular structure of **10a** in the solid state. Hydrogen atoms are omitted for clarity. Thermal ellipsoids are drawn with 50 % probability level. Selected bond lengths [Å] and angles [°]: P1-As1 2.3111(8), As1-As2 2.4699(5), As2-As3 2.3531(5), As1-As3 2.4644(5), As1-As2-As3-P1 53.056.

### 3.10 [Cp''Co( $\eta^2$ : $\eta^1$ -As<sub>3</sub>PCy<sub>2</sub>)] (10b)

Compound **10b** crystallizes from a concentrated solution in toluene layered with MeCN at -30 °C in the monoclinic space group  $P2_1/n$  as light red needles. The asymmetric unit contains one molecule **10b**. The structure in solid state is depicted in Figure S65 and S66.

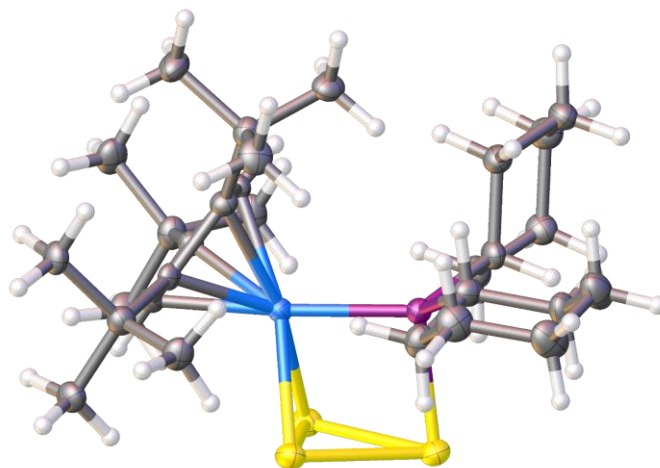

**Figure S65:** Molecular structure of **10b** in the solid state. Thermal ellipsoids are drawn with 50 % probability level.

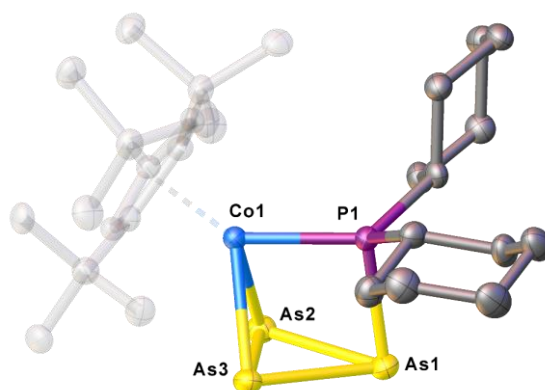

**Figure S66:** Molecular structure of **10b** in the solid state. Hydrogen atoms are omitted for clarity. Thermal ellipsoids are drawn with 50 % probability level. Selected bond lengths [Å] and angles [°]: P1-As1 2.2991(11), As1-As2 2.4731(6), As2-As3 2.3496(6), As1-As3 2.4717(7), As1-As2-As3-P1 52.204.

### 3.11 [Cp''Co( $\eta^3$ -P<sub>3</sub>SiL)] (L = (tBuN)<sub>2</sub>CPh) (**11**)

Compound **11** crystallizes from a concentrated solution in *o*-difluorobenzene layered with *n*-pentane at -30 °C in the triclinic space group  $P\bar{1}$  as light green blocks. The asymmetric unit contains one molecule **11**, 0.3 toluene and 0.15 *o*-difluorobenzene molecules. The solvent molecules are located on the same position. The restraints SADI, SIMU, FLAT, DFIX were applied to describe the solvent molecules properly. Since the measured crystal was twinned, a HKLF5 refinement was applied. The structure in solid state is depicted in Figure S67 and S68.

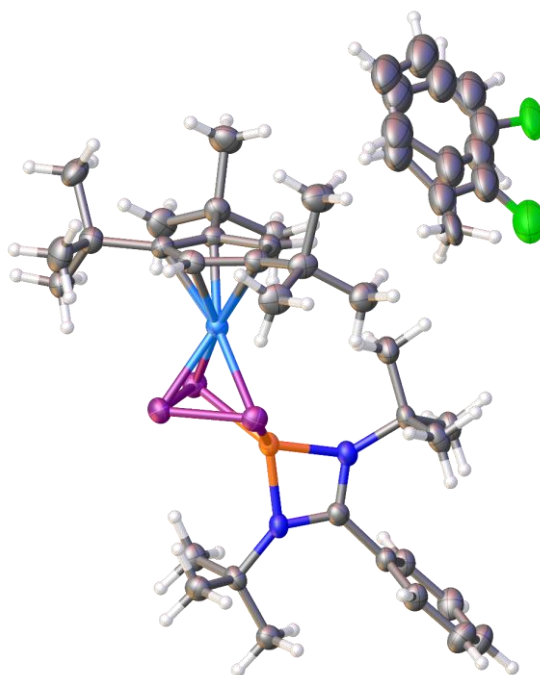

**Figure S67:** Molecular structure of **11** in the solid state. Thermal ellipsoids are drawn with 50 % probability level.

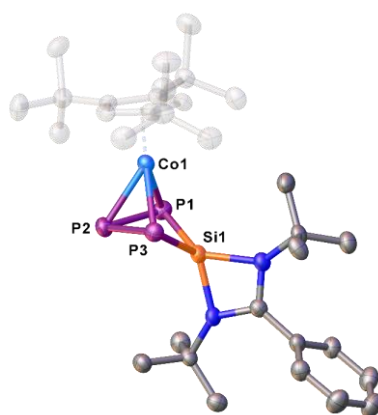

**Figure S68:** Molecular structure of **11** in the solid state. Hydrogen atoms are omitted for clarity. Thermal ellipsoids are drawn with 50 % probability level. Selected bond lengths [Å] and angles [°]: Si1-P1 2.1682(17), P1-P2 2.2283(19), P2-P3 2.2032(18), Si1-P3 2.1696(18), P1-P2-P3-Si1 -30.168.

### 3.12 [Cp''Co( $\eta^3$ -As<sub>3</sub>SiL)] (L = (tBuN)<sub>2</sub>CPh) (**12**)

Compound **12** crystallizes from a concentrated solution in a mixture of toluene and *n*-pentane at -30 °C in the orthorhombic space group *Iba*2 as dark brown needles. The asymmetric unit contains one molecule **12** and 0.5 molecules toluene. One tBu group of the amidinato ligand is disordered over two positions with side occupancies of 50 and 50 %. The restraints SADI and SIMU were applied to describe the disorder and the solvent molecule. The structure in solid state is depicted in Figure S69 and S70.

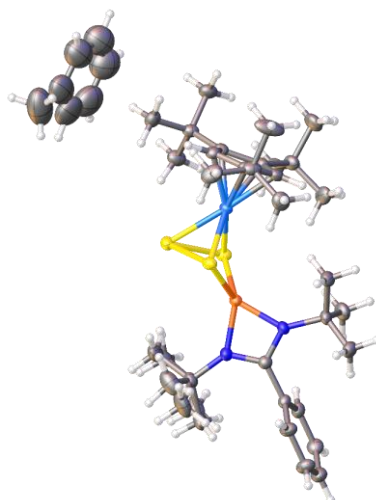

**Figure S69:** Molecular structure of **12** in the solid state. Thermal ellipsoids are drawn with 50 % probability level.

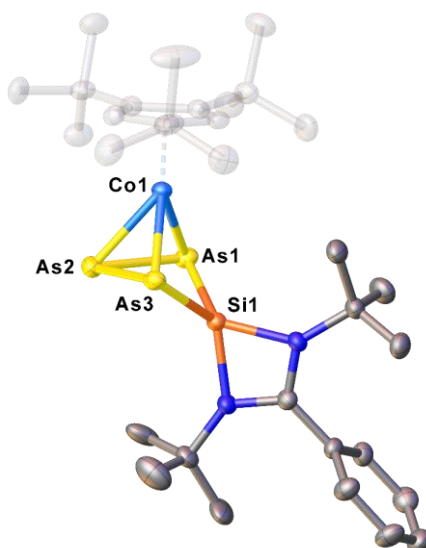

**Figure S70:** Molecular structure of **12** in the solid state. Hydrogen atoms are omitted for clarity. Thermal ellipsoids are drawn with 50 % probability level. Selected bond lengths [Å] and angles [°]: Si1-As1 2.2853(14), As1-As2 2.4417(8), As2-As3 2.4342(8), Si1-As3 2.2775(14), As1-As2-As3-Si1 -30.438.

### 3.13 [Cp<sup>'''</sup>Co( $\eta^2$ : $\eta^1$ -As<sub>3</sub>P<sub>2</sub>Ph<sub>4</sub>)] [TEF] (13)

Compound **13** crystallizes from a concentrated solution in CH<sub>2</sub>Cl<sub>2</sub> layered with *n*-pentane at room temperature in the monoclinic space group *P*2<sub>1</sub>/*n* as dark red blocks. The asymmetric unit contains one cation of **13** and one [TEF] counterion. Two 'Bu groups of the Cp<sup>'''</sup> are disordered over two positions with side occupancies of 70/30 % and 72/28 %, respectively. Several side groups of [TEF] are disordered over two and three positions, respectively. The restraints SADI, SIMU and DFIX were applied to describe the disorder properly. The structure in solid state is depicted in Figure S71 and S72.

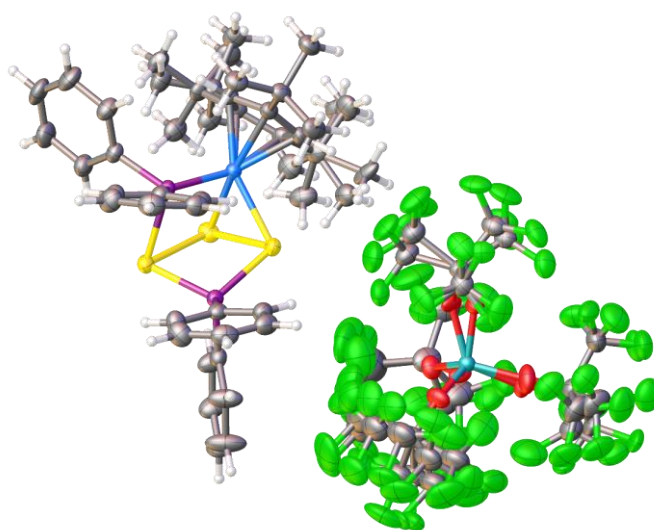

**Figure S71:** Molecular structure of **13** in the solid state. Thermal ellipsoids are drawn with 50 % probability level.

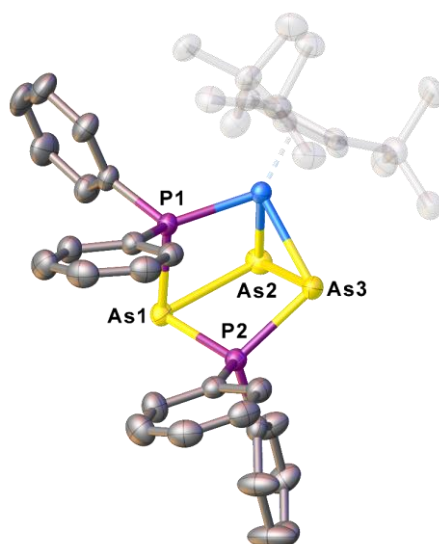

**Figure S72:** Molecular structure of the cation in **13** in the solid state. Hydrogen atoms are omitted for clarity. Thermal ellipsoids are drawn with 50 % probability level. Selected bond lengths [Å] and angles [°]: P1-As1 2.3277(8), As1-P2 2.877(8), As1-As2 2.5758(5), As2-As3 2.4360(5), As3-P2 2.2999(8), As1-As2-As3-P2 21.255.

### 3.14 Crystallographic information

**Table S8:** Crystallographic data for all compounds

|                                                | [K(18-c-6)]Cp'''                                | [K(18-c-6)][5]                                                   | [K(18-c-6)][6]                                                    | <b>7b</b>                                        |
|------------------------------------------------|-------------------------------------------------|------------------------------------------------------------------|-------------------------------------------------------------------|--------------------------------------------------|
| CCDC                                           | 2068519                                         | 2068508                                                          | 2068509                                                           | 2068510                                          |
| Formula                                        | C <sub>29</sub> H <sub>53</sub> KO <sub>6</sub> | C <sub>33</sub> H <sub>61</sub> CoKO <sub>7</sub> P <sub>3</sub> | C <sub>33</sub> H <sub>61</sub> As <sub>3</sub> CoKO <sub>7</sub> | C <sub>29</sub> H <sub>51</sub> CoP <sub>4</sub> |
| <i>D</i> <sub>calc.</sub> / g cm <sup>-3</sup> | 1.175                                           | 1.280                                                            | 1.487                                                             | 1.242                                            |
| $\mu$ /mm <sup>-1</sup>                        | 1.827                                           | 5.833                                                            | 7.404                                                             | 6.363                                            |
| Formula Weight                                 | 536.81                                          | 760.75                                                           | 892.60                                                            | 582.50                                           |
| Colour                                         | clear colourless                                | clear light red                                                  | clear dark brown                                                  | clear dark red                                   |
| Shape                                          | block                                           | plate                                                            | plate                                                             | block                                            |
| Size/mm <sup>3</sup>                           | 1.35x0.81x0.48                                  | 0.14x0.10x0.03                                                   | 0.30x0.22x0.10                                                    | 0.13x0.09x0.07                                   |
| <i>T</i> /K                                    | 123                                             | 123                                                              | 123                                                               | 123.00(10)                                       |
| Crystal System                                 | monoclinic                                      | monoclinic                                                       | monoclinic                                                        | triclinic                                        |
| Space Group                                    | <i>P</i> 2 <sub>1</sub> / <i>n</i>              | <i>C</i> 2/ <i>c</i>                                             | <i>C</i> 2/ <i>c</i>                                              | <i>P</i> -1                                      |
| <i>a</i> /Å                                    | 12.5984(4)                                      | 30.2249(6)                                                       | 30.1599(3)                                                        | 10.1837(3)                                       |
| <i>b</i> /Å                                    | 16.4532(5)                                      | 11.1053(2)                                                       | 11.17800(10)                                                      | 10.4065(3)                                       |
| <i>c</i> /Å                                    | 14.7366(4)                                      | 23.5687(4)                                                       | 23.6964(2)                                                        | 16.2817(4)                                       |
| $\alpha$ /°                                    | 90                                              | 90                                                               | 90                                                                | 77.135(2)                                        |
| $\beta$ /°                                     | 96.374(3)                                       | 93.551(2)                                                        | 93.3930(10)                                                       | 88.821(2)                                        |
| $\gamma$ /°                                    | 90                                              | 90                                                               | 90                                                                | 68.166(2)                                        |
| <i>V</i> /Å <sup>3</sup>                       | 3035.78(16)                                     | 7895.8(3)                                                        | 7974.70(13)                                                       | 1557.80(8)                                       |
| <i>Z</i>                                       | 4                                               | 8                                                                | 8                                                                 | 2                                                |
| <i>Z'</i>                                      | 1                                               | 1                                                                | 1                                                                 | 1                                                |
| Wavelength/Å                                   | 1.54184                                         | 1.54184                                                          | 1.54184                                                           | 1.54184                                          |
| Radiation type                                 | Cu K $\alpha$                                   | CuK $\alpha$                                                     | Cu K $\alpha$                                                     | Cu K $\alpha$                                    |
| $\theta$ <sub>min</sub> /°                     | 4.041                                           | 3.758                                                            | 3.737                                                             | 2.790                                            |
| $\theta$ <sub>max</sub> /°                     | 71.877                                          | 72.979                                                           | 72.134                                                            | 73.334                                           |
| Measured Refl.                                 | 10964                                           | 13394                                                            | 14506                                                             | 18014                                            |
| Independent Refl.                              | 5746                                            | 7514                                                             | 7559                                                              | 5956                                             |
| Reflections with <i>I</i> > 2( <i>I</i> )      | 4933                                            | 6972                                                             | 6388                                                              | 5551                                             |
| <i>R</i> <sub>int</sub>                        | 0.0413                                          | 0.0233                                                           | 0.0248                                                            | 0.0248                                           |
| Parameters                                     | 334                                             | 460                                                              | 415                                                               | 316                                              |
| Restraints                                     | 0                                               | 66                                                               | 0                                                                 | 0                                                |
| Largest Peak                                   | 0.594                                           | 0.307                                                            | 0.581                                                             | 0.306                                            |
| Deepest Hole                                   | -0.603                                          | -0.334                                                           | -0.559                                                            | -0.222                                           |
| GooF                                           | 1.033                                           | 1.037                                                            | 0.993                                                             | 1.057                                            |
| <i>wR</i> <sub>2</sub> (all data)              | 0.1309                                          | 0.0804                                                           | 0.0812                                                            | 0.0667                                           |
| <i>wR</i> <sub>2</sub>                         | 0.1273                                          | 0.0780                                                           | 0.0797                                                            | 0.0658                                           |
| <i>R</i> <sub>1</sub> (all data)               | 0.0556                                          | 0.0342                                                           | 0.0369                                                            | 0.0292                                           |
| <i>R</i> <sub>1</sub>                          | 0.0498                                          | 0.0311                                                           | 0.0310                                                            | 0.0267                                           |

|                              | <b>7c</b>                                        | <b>8a</b>                                        | <b>9b</b>                                           | <b>9c</b>                                           |
|------------------------------|--------------------------------------------------|--------------------------------------------------|-----------------------------------------------------|-----------------------------------------------------|
| CCDC                         | 2068511                                          | 2068512                                          | 2068513                                             | 2068514                                             |
| Formula                      | C <sub>25</sub> H <sub>47</sub> CoP <sub>4</sub> | C <sub>29</sub> H <sub>39</sub> CoP <sub>4</sub> | C <sub>29</sub> H <sub>51</sub> As <sub>3</sub> CoP | C <sub>25</sub> H <sub>47</sub> As <sub>3</sub> CoP |
| $D_{calc.}/g\text{ cm}^{-3}$ | 1.247                                            | 1.334                                            | 1.509                                               | 1.526                                               |
| $\mu/\text{mm}^{-1}$         | 6.963                                            | 6.980                                            | 8.371                                               | 9.077                                               |
| Formula Weight               | 530.43                                           | 570.41                                           | 714.35                                              | 662.28                                              |
| Colour                       | clear dark red                                   | clear light red                                  | clear dark brown                                    | clear dark red                                      |
| Shape                        | block                                            | plate                                            | block                                               | block                                               |
| Size/mm <sup>3</sup>         | 0.40×0.22×0.13                                   | 0.30×0.09×0.06                                   | 0.16×0.13×0.10                                      | 0.29×0.23×0.15                                      |
| T/K                          | 123.00(10)                                       | 122.8(2)                                         | 123.00(10)                                          | 123.01(10)                                          |
| Crystal System               | monoclinic                                       | orthorhombic                                     | monoclinic                                          | monoclinic                                          |
| Flack Parameter              |                                                  | -0.021(4)                                        |                                                     |                                                     |
| Hooft Parameter              |                                                  | -0.0408(15)                                      |                                                     |                                                     |
| Space Group                  | <i>P</i> 2 <sub>1</sub> / <i>c</i>               | <i>P</i> na2 <sub>1</sub>                        | <i>P</i> 2 <sub>1</sub> / <i>n</i>                  | <i>P</i> 2 <sub>1</sub> / <i>n</i>                  |
| <i>a</i> /Å                  | 11.36840(10)                                     | 19.9527(2)                                       | 9.76050(10)                                         | 11.95260(10)                                        |
| <i>b</i> /Å                  | 32.1117(3)                                       | 17.0952(2)                                       | 26.8846(2)                                          | 19.9509(2)                                          |
| <i>c</i> /Å                  | 15.49090(10)                                     | 8.32470(10)                                      | 12.35050(10)                                        | 12.79890(10)                                        |
| $\alpha/^\circ$              | 90                                               | 90                                               | 90                                                  | 90                                                  |
| $\beta/^\circ$               | 91.7220(10)                                      | 90                                               | 104.0680(10)                                        | 109.1460(10)                                        |
| $\gamma/^\circ$              | 90                                               | 90                                               | 90                                                  | 90                                                  |
| <i>V</i> /Å <sup>3</sup>     | 5652.53(8)                                       | 2839.52(6)                                       | 3143.66(5)                                          | 2883.27(5)                                          |
| <i>Z</i>                     | 8                                                | 4                                                | 4                                                   | 4                                                   |
| <i>Z'</i>                    | 2                                                | 1                                                | 1                                                   | 1                                                   |
| Wavelength/Å                 | 1.54184                                          | 1.54184                                          | 1.54184                                             | 1.54184                                             |
| Radiation type               | Cu K $\alpha$                                    | Cu K $\alpha$                                    | Cu K $\alpha$                                       | Cu K $\alpha$                                       |
| $\theta_{min}/^\circ$        | 2.752                                            | 3.404                                            | 3.288                                               | 4.276                                               |
| $\theta_{max}/^\circ$        | 75.150                                           | 73.276                                           | 73.421                                              | 73.030                                              |
| Measured Refl.               | 47338                                            | 12825                                            | 18649                                               | 15821                                               |
| Independent Refl.            | 11121                                            | 4884                                             | 6065                                                | 5565                                                |
| Reflections with $I > 2(I)$  | 9838                                             | 4670                                             | 5762                                                | 5362                                                |
| $R_{int}$                    | 0.0556                                           | 0.0278                                           | 0.0233                                              | 0.0382                                              |
| Parameters                   | 571                                              | 316                                              | 316                                                 | 286                                                 |
| Restraints                   | 0                                                | 1                                                | 0                                                   | 0                                                   |
| Largest Peak                 | 0.723                                            | 0.324                                            | 0.403                                               | 0.928                                               |
| Deepest Hole                 | -0.450                                           | -0.436                                           | -0.385                                              | -1.450                                              |
| GooF                         | 1.073                                            | 1.044                                            | 1.041                                               | 1.053                                               |
| $wR_2$ (all data)            | 0.1292                                           | 0.1010                                           | 0.0611                                              | 0.1142                                              |
| $wR_2$                       | 0.1265                                           | 0.1001                                           | 0.0604                                              | 0.1134                                              |
| $R_1$ (all data)             | 0.0507                                           | 0.0385                                           | 0.0249                                              | 0.0423                                              |
| $R_1$                        | 0.0458                                           | 0.0368                                           | 0.0234                                              | 0.0413                                              |



|                             | 10a                                                 | 10b                                                 | 11                                                                                  | 12                                                                    |
|-----------------------------|-----------------------------------------------------|-----------------------------------------------------|-------------------------------------------------------------------------------------|-----------------------------------------------------------------------|
| CCDC                        | 2068515                                             | 2068516                                             | 2068517                                                                             | 2068518                                                               |
| Formula                     | C <sub>29</sub> H <sub>39</sub> As <sub>3</sub> CoP | C <sub>29</sub> H <sub>51</sub> As <sub>3</sub> CoP | C <sub>35</sub> H <sub>55</sub> CoF <sub>0.3</sub> N <sub>2</sub> P <sub>3</sub> Si | C <sub>35.5</sub> H <sub>56</sub> As <sub>3</sub> CoN <sub>2</sub> Si |
| $D_{calc}/g\text{ cm}^{-3}$ | 1.636                                               | 1.535                                               | 1.237                                                                               | 1.430                                                                 |
| $\mu/\text{mm}^{-1}$        | 9.227                                               | 8.513                                               | 5.368                                                                               | 6.890                                                                 |
| Formula Weight              | 702.26                                              | 714.35                                              | 689.44                                                                              | 822.60                                                                |
| Colour                      | clear dark brown                                    | clear light red                                     | clear yellow                                                                        | clear dark brown                                                      |
| Shape                       | block                                               | needle                                              | block                                                                               | needle                                                                |
| Size/mm <sup>3</sup>        | 0.23×0.20×0.12                                      | 0.06×0.03×0.02                                      | 0.12×0.03×0.03                                                                      | 0.17×0.03×0.02                                                        |
| T/K                         | 123.00(10)                                          | 100.00(10)                                          | 100.01(11)                                                                          | 123.00(10)                                                            |
| Crystal System              | triclinic                                           | monoclinic                                          | triclinic                                                                           | orthorhombic                                                          |
| Flack Parameter             |                                                     |                                                     |                                                                                     | -0.025(3)                                                             |
| Hooft Parameter             |                                                     |                                                     |                                                                                     | -0.0489(12)                                                           |
| Space Group                 | <i>P</i> -1                                         | <i>P</i> 2 <sub>1</sub> / <i>n</i>                  | <i>P</i> -1                                                                         | <i>I</i> ba2                                                          |
| <i>a</i> /Å                 | 9.8743(3)                                           | 11.4067(2)                                          | 9.1256(2)                                                                           | 38.4780(3)                                                            |
| <i>b</i> /Å                 | 9.8999(2)                                           | 18.5988(4)                                          | 11.1103(2)                                                                          | 22.6217(2)                                                            |
| <i>c</i> /Å                 | 15.0948(4)                                          | 14.9530(4)                                          | 18.6766(7)                                                                          | 8.77920(10)                                                           |
| $\alpha/^\circ$             | 83.199(2)                                           | 90                                                  | 101.919(3)                                                                          | 90                                                                    |
| $\beta/^\circ$              | 77.824(2)                                           | 102.974(2)                                          | 92.285(2)                                                                           | 90                                                                    |
| $\gamma/^\circ$             | 83.313(2)                                           | 90                                                  | 90.166(2)                                                                           | 90                                                                    |
| $V/\text{Å}^3$              | 1425.87(7)                                          | 3091.31(12)                                         | 1851.17(9)                                                                          | 7641.75(13)                                                           |
| <i>Z</i>                    | 2                                                   | 4                                                   | 2                                                                                   | 8                                                                     |
| <i>Z'</i>                   | 1                                                   | 1                                                   | 1                                                                                   | 1                                                                     |
| Wavelength/Å                | 1.54184                                             | 1.54184                                             | 1.54184                                                                             | 1.54184                                                               |
| Radiation type              | Cu K $\alpha$                                       | Cu K $\alpha$                                       | Cu K $\alpha$                                                                       | Cu K $\alpha$                                                         |
| $\theta_{min}/^\circ$       | 4.518                                               | 3.854                                               | 2.420                                                                               | 2.266                                                                 |
| $\theta_{max}/^\circ$       | 66.638                                              | 73.109                                              | 74.132                                                                              | 73.263                                                                |
| Measured Refl.              | 17769                                               | 15969                                               | 11064                                                                               | 41068                                                                 |
| Independent Refl.           | 5021                                                | 5841                                                | 11064                                                                               | 7355                                                                  |
| Reflections with $I > 2(I)$ | 4547                                                | 4436                                                | 8937                                                                                | 6961                                                                  |
| $R_{int}$                   | 0.0589                                              | 0.0520                                              | .                                                                                   | 0.0322                                                                |
| Parameters                  | 316                                                 | 316                                                 | 504                                                                                 | 461                                                                   |
| Restraints                  | 0                                                   | 0                                                   | 283                                                                                 | 113                                                                   |
| Largest Peak                | 0.694                                               | 0.926                                               | 0.641                                                                               | 0.447                                                                 |
| Deepest Hole                | -1.130                                              | -0.759                                              | -0.754                                                                              | -0.600                                                                |
| GooF                        | 1.013                                               | 0.980                                               | 1.074                                                                               | 1.044                                                                 |
| $wR_2$ (all data)           | 0.1001                                              | 0.1151                                              | 0.1769                                                                              | 0.0776                                                                |
| $wR_2$                      | 0.0991                                              | 0.1092                                              | 0.1653                                                                              | 0.0765                                                                |
| $R_1$ (all data)            | 0.0428                                              | 0.0631                                              | 0.0803                                                                              | 0.0340                                                                |
| $R_1$                       | 0.0402                                              | 0.0432                                              | 0.0645                                                                              | 0.0314                                                                |

|                             | <b>13</b>                       |  |  |  |
|-----------------------------|---------------------------------|--|--|--|
| CCDC                        | 2069835                         |  |  |  |
| Formula                     | $C_{57}H_{49}AlAs_3CoF_{36}O_4$ |  |  |  |
|                             | $P_2$                           |  |  |  |
| $D_{calc.}/g\ cm^{-3}$      | 1.790                           |  |  |  |
| $\mu/mm^{-1}$               | 5.436                           |  |  |  |
| Formula Weight              | 1854.57                         |  |  |  |
| Colour                      | clear dark red                  |  |  |  |
| Shape                       | block                           |  |  |  |
| Size/mm <sup>3</sup>        | 0.18×0.09×0.06                  |  |  |  |
| $T/K$                       | 123.01(10)                      |  |  |  |
| Crystal System              | monoclinic                      |  |  |  |
| Space Group                 | $P2_1/n$                        |  |  |  |
| $a/\text{Å}$                | 10.85358(6)                     |  |  |  |
| $b/\text{Å}$                | 26.67722(14)                    |  |  |  |
| $c/\text{Å}$                | 24.07410(14)                    |  |  |  |
| $\alpha/^\circ$             | 90                              |  |  |  |
| $\beta/^\circ$              | 99.0545(5)                      |  |  |  |
| $\gamma/^\circ$             | 90                              |  |  |  |
| $V/\text{Å}^3$              | 6883.64(6)                      |  |  |  |
| $Z$                         | 4                               |  |  |  |
| $Z'$                        | 1                               |  |  |  |
| Wavelength/Å                | 1.54184                         |  |  |  |
| Radiation type              | Cu $K_\alpha$                   |  |  |  |
| $\theta_{min}/^\circ$       | 2.489                           |  |  |  |
| $\theta_{max}/^\circ$       | 73.195                          |  |  |  |
| Measured Refl.              | 95862                           |  |  |  |
| Independent Refl.           | 13601                           |  |  |  |
| Reflections with $I > 2(I)$ | 12862                           |  |  |  |
| $R_{int}$                   | 0.0382                          |  |  |  |
| Parameters                  | 1520                            |  |  |  |
| Restraints                  | 1439                            |  |  |  |
| Largest Peak                | 0.994                           |  |  |  |
| Deepest Hole                | -0.633                          |  |  |  |
| GooF                        | 1.051                           |  |  |  |
| $wR_2$ (all data)           | 0.1191                          |  |  |  |
| $wR_2$                      | 0.1180                          |  |  |  |
| $R_1$ (all data)            | 0.0466                          |  |  |  |
| $R_1$                       | 0.0450                          |  |  |  |

## 4. Computational Details

Gaussian 09 program package was used throughout.<sup>[8]</sup> Density functional theory (DFT) in form of BP86<sup>[9]</sup> (Becke's exchange and Perdew 86 correlation functional) or Becke's three-parameter hybrid functional B3LYP<sup>[10]</sup> with def2-SVP and def2-TZVP all electron basis set<sup>[11]</sup> was employed. For solvents effects has been accounted by using continuous polarizable continuum model (CPM).<sup>[12]</sup> The dielectric constant of thf ( $\epsilon = 7.4257$ ) has been used in the calculations. The Natural Bond Orbital (NBO) analysis has been performed with the NBO6 program.<sup>[13]</sup> The long range dispersion correction GD3BJ was applied.<sup>[14]</sup> The figures for the supporting information concerning the DFT calculations were created with Chemcraft.<sup>[15]</sup> Stationary points were verified by analytical frequency analysis. The transition states were verified by slightly changing its molecular geometry along its imaginary frequency and then performing geometry optimizations on the obtained structures. For the calculations of the reactions mechanism all geometries have been optimized at the BP86/def2-SVP level of theory. The nature of the stationary points and transition states has been determined by frequency analysis at the BP86/def2-SVP level of theory. The energies used in all diagrams has been calculated as single point calculations on the B3LYP/def2-TZVP level of theory with included dispersion GD3BJ and CPM model. For the energy diagrams the SCF energies without zero point correction have been used. To check if stationary point nature of  $[\text{Cp}^{\text{H}}\text{Co}(\eta^2:\eta^1\text{-P}_4\text{Me}_2)]$  (**P-2**) is still valid at B3LYP-GD3BJ/def2-TZVP, CPM level of theory frequency analysis of **P-1**, **P-2** and **TS-5** was conducted.

### 4.1 Details for Cp''' compounds

**Table S9:** Total energies for optimized geometries, optimization at the BP86/def2-SVP level and single point energies at the B3LYP/def2-TZVP level of theory including solvent effects and dispersion correction GD3BJ.

|                                                                                    | BP86/def2-SVP<br>total energy [Ha] | B3LYP/def2-TZVP<br>total energy [Ha] |
|------------------------------------------------------------------------------------|------------------------------------|--------------------------------------|
| <b>[5]</b> $[\text{Cp}^{\text{H}}\text{Co}(\eta^3\text{-P}_3)]^-$                  | -3071.62228121                     | -3072.79099698                       |
| <b>[6]</b> $[\text{Cp}^{\text{H}}\text{Co}(\eta^3\text{-As}_3)]^-$                 | -8755.43569604                     | -8756.44208718                       |
| <b>7a</b> $[\text{Cp}^{\text{H}}\text{Co}(\eta^3\text{-P}_4\text{Ph}_2)]$          | -3875.81137692                     | -3877.60687225                       |
| <b>7b</b> $[\text{Cp}^{\text{H}}\text{Co}(\eta^3\text{-P}_4\text{Cy}_2)]$          | -3883.04688736                     | -3884.87586579                       |
| <b>7c</b> $[\text{Cp}^{\text{H}}\text{Co}(\eta^3\text{-P}_4^t\text{Bu}_2)]$        | -3728.29701936                     | -3729.94988002                       |
| <b>8a</b> $[\text{Cp}^{\text{H}}\text{Co}(\eta^2:\eta^1\text{-P}_4\text{Ph}_2)]$   | -3875.81961643                     | -3877.61957558                       |
| <b>8b</b> $[\text{Cp}^{\text{H}}\text{Co}(\eta^2:\eta^1\text{-P}_4\text{Cy}_2)]$   | -3883.04458724                     | -3884.87662585                       |
| <b>8c</b> $[\text{Cp}^{\text{H}}\text{Co}(\eta^2:\eta^1\text{-P}_4^t\text{Bu}_2)]$ | -3728.29294074                     | -3729.94885268                       |
| <b>9a</b> $[\text{Cp}^{\text{H}}\text{Co}(\eta^3\text{-As}_3\text{PPh}_2)]$        | -9559.62630722                     | -9561.25952305                       |
| <b>9b</b> $[\text{Cp}^{\text{H}}\text{Co}(\eta^3\text{-As}_3\text{PCy}_2)]$        | -9566.86443620                     | -9568.53146555                       |

|                                                                                                                    |                |                |
|--------------------------------------------------------------------------------------------------------------------|----------------|----------------|
| <b>9c</b> [Cp <sup>'''</sup> Co(η <sup>3</sup> -As <sub>3</sub> P <sup>t</sup> Bu <sub>2</sub> )]                  | -9412.11179292 | -9413.60412441 |
| <b>10a</b> [Cp <sup>'''</sup> Co(η <sup>2</sup> :η <sup>1</sup> -As <sub>3</sub> PPh <sub>2</sub> )]               | -9559.63464297 | -9561.27507649 |
| <b>10b</b> [Cp <sup>'''</sup> Co(η <sup>2</sup> :η <sup>1</sup> -As <sub>3</sub> PCy <sub>2</sub> )]               | -9566.85790484 | -9568.52983577 |
| <b>10c</b> [Cp <sup>'''</sup> Co(η <sup>2</sup> :η <sup>1</sup> -As <sub>3</sub> P <sup>t</sup> Bu <sub>2</sub> )] | -9412.10436931 | -9413.60119064 |
| <b>11</b> [Cp <sup>'''</sup> Co(η <sup>3</sup> -P <sub>3</sub> Si( <sup>t</sup> BuN) <sub>2</sub> CPh)]            | -4055.47786624 | -4057.56542088 |
| <b>12</b> [Cp <sup>'''</sup> Co(η <sup>3</sup> -As <sub>3</sub> Si( <sup>t</sup> BuN) <sub>2</sub> CPh)]           | -9739.28936049 | -9741.21726378 |

**Table S10:** Optimized geometry of [5]. XYZ coordinated in angstroms. BP86/def2-SVP level of theory.

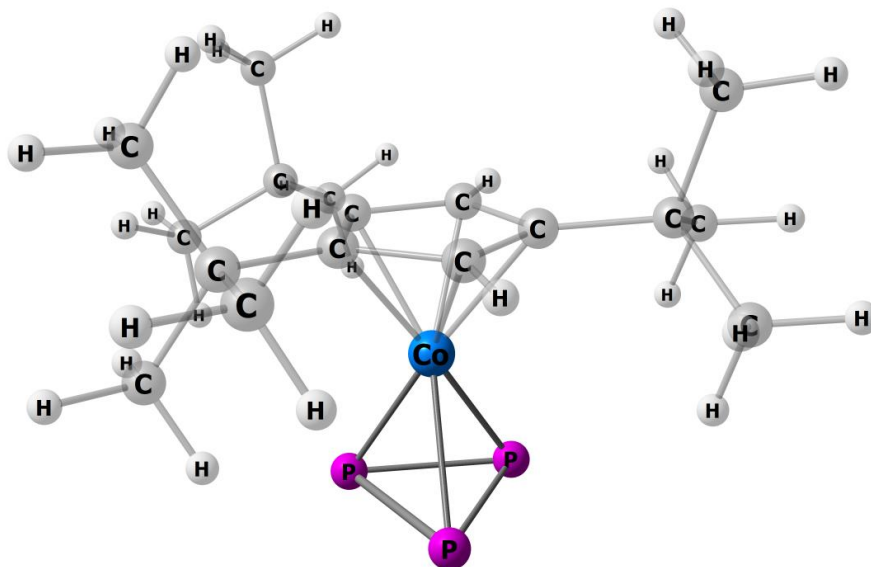

|    |              |             |              |   |              |              |              |
|----|--------------|-------------|--------------|---|--------------|--------------|--------------|
| Co | 10.602550000 | 3.977659000 | 9.795649000  | C | 9.986792000  | 0.178998000  | 10.350621000 |
| P  | 10.648072000 | 2.988791000 | 7.711719000  | H | 10.232075000 | 0.520331000  | 9.323453000  |
| P  | 9.758149000  | 4.989182000 | 7.914074000  | H | 9.332464000  | -0.717844000 | 10.278269000 |
| P  | 11.941830000 | 4.733615000 | 8.083632000  | H | 10.924123000 | -0.142804000 | 10.843146000 |
| C  | 11.440785000 | 3.010384000 | 11.409444000 | C | 8.946758000  | 0.805918000  | 12.567713000 |
| C  | 10.017072000 | 2.642477000 | 11.204527000 | H | 9.874624000  | 0.601808000  | 13.139488000 |
| C  | 9.248669000  | 3.874601000 | 11.300006000 | H | 8.343377000  | -0.129940000 | 12.549476000 |
| H  | 8.158826000  | 3.941048000 | 11.204887000 | H | 8.373980000  | 1.575265000  | 13.127052000 |
| C  | 10.123906000 | 5.002625000 | 11.501864000 | C | 7.902390000  | 1.500996000  | 10.393325000 |
| C  | 11.454494000 | 4.458712000 | 11.560920000 | H | 7.203181000  | 2.141233000  | 10.968639000 |
| H  | 12.358218000 | 5.063117000 | 11.698171000 | H | 7.399666000  | 0.520660000  | 10.243008000 |
| C  | 12.744846000 | 2.184897000 | 11.551138000 | H | 8.067981000  | 1.974396000  | 9.404050000  |
| C  | 13.921070000 | 3.115953000 | 11.946096000 | C | 9.724035000  | 6.454533000  | 11.764695000 |
| H  | 14.109443000 | 3.879915000 | 11.164826000 | C | 10.741511000 | 7.424722000  | 11.122209000 |
| H  | 14.850247000 | 2.516665000 | 12.062868000 | H | 11.761434000 | 7.279014000  | 11.535587000 |
| H  | 13.730858000 | 3.638659000 | 12.906787000 | H | 10.450882000 | 8.482214000  | 11.311998000 |
| C  | 13.171185000 | 1.496666000 | 10.229291000 | H | 10.797424000 | 7.256173000  | 10.027445000 |
| H  | 12.417265000 | 0.779056000 | 9.860986000  | C | 9.693753000  | 6.688354000  | 13.299574000 |
| H  | 14.130366000 | 0.946563000 | 10.368451000 | C | 8.323684000  | 6.752790000  | 11.185085000 |
| H  | 13.305598000 | 2.258789000 | 9.435187000  | H | 8.303690000  | 6.545212000  | 10.095097000 |
| C  | 12.620872000 | 1.136931000 | 12.687625000 | H | 8.049982000  | 7.818075000  | 11.353025000 |
| H  | 12.341826000 | 1.625011000 | 13.645880000 | H | 7.541974000  | 6.128109000  | 11.666836000 |
| H  | 13.588687000 | 0.608818000 | 12.840980000 | H | 9.395632000  | 7.733112000  | 13.544396000 |
| H  | 11.855671000 | 0.366990000 | 12.469075000 | H | 8.972275000  | 6.000466000  | 13.789737000 |
| C  | 9.256259000  | 1.296308000 | 11.126392000 | H | 10.691848000 | 6.500976000  | 13.749201000 |

**Table S11:** Optimized geometry of [6]. XYZ coordinated in angstroms. BP86/def2-SVP level of theory.

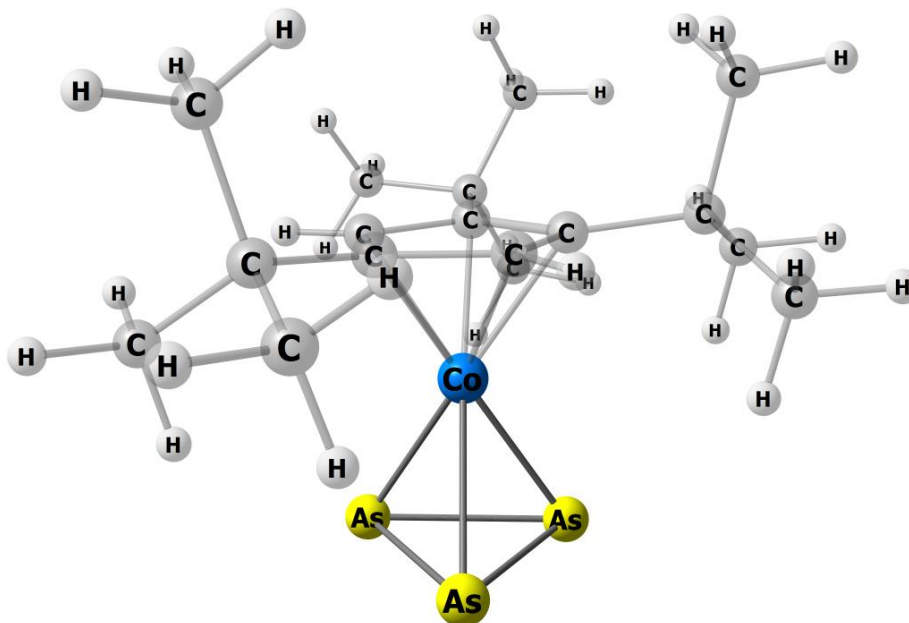

|    |              |              |              |   |              |              |              |
|----|--------------|--------------|--------------|---|--------------|--------------|--------------|
| As | 16.712210000 | 4.876835000  | 15.521252000 | H | 19.369673000 | 7.741226000  | 10.017955000 |
| As | 17.991899000 | 2.847573000  | 15.909438000 | C | 16.137308000 | 1.257984000  | 10.745331000 |
| As | 19.133670000 | 4.979323000  | 15.737458000 | H | 16.417067000 | 1.808321000  | 9.821636000  |
| Co | 18.132887000 | 3.988339000  | 13.776603000 | H | 15.177093000 | 0.728876000  | 10.552073000 |
| C  | 18.634314000 | 5.030143000  | 12.080106000 | H | 16.911600000 | 0.486096000  | 10.920628000 |
| C  | 17.299415000 | 4.497588000  | 12.007697000 | C | 18.709631000 | 0.154180000  | 13.074258000 |
| H  | 16.401156000 | 5.109963000  | 11.871313000 | H | 18.405508000 | 0.436784000  | 14.103572000 |
| C  | 19.496243000 | 3.892262000  | 12.282287000 | H | 19.364343000 | -0.743188000 | 13.136273000 |
| H  | 20.585704000 | 3.947546000  | 12.388307000 | H | 17.804480000 | -0.143574000 | 12.511386000 |
| C  | 17.300248000 | 3.047975000  | 12.138016000 | C | 14.822194000 | 3.185795000  | 11.587902000 |
| C  | 18.718964000 | 2.663879000  | 12.349230000 | H | 14.634406000 | 3.915244000  | 12.402056000 |
| C  | 19.048133000 | 6.477096000  | 11.809642000 | H | 13.892634000 | 2.593114000  | 11.443978000 |
| C  | 19.476313000 | 1.312890000  | 12.401492000 | H | 15.012345000 | 3.749657000  | 10.650829000 |
| C  | 20.792085000 | 1.476333000  | 13.209502000 | C | 15.551136000 | 1.472003000  | 13.215397000 |
| H  | 21.511092000 | 2.158996000  | 12.712827000 | H | 16.306138000 | 0.745829000  | 13.561961000 |
| H  | 21.296617000 | 0.491034000  | 13.315475000 | H | 14.602506000 | 0.919134000  | 13.025574000 |
| H  | 20.578676000 | 1.880466000  | 14.220290000 | H | 15.387332000 | 2.189228000  | 14.044845000 |
| C  | 15.995431000 | 2.234779000  | 11.942180000 | C | 18.045601000 | 7.462032000  | 12.452446000 |
| C  | 19.853478000 | 0.899869000  | 10.951442000 | H | 18.345708000 | 8.514985000  | 12.252552000 |
| H  | 18.951875000 | 0.742017000  | 10.325013000 | H | 17.994778000 | 7.302030000  | 13.548834000 |
| H  | 20.444893000 | -0.043679000 | 10.944987000 | H | 17.021512000 | 7.323015000  | 12.046983000 |
| H  | 20.461677000 | 1.692056000  | 10.466399000 | C | 20.457651000 | 6.763858000  | 12.371316000 |
| C  | 19.066768000 | 6.700133000  | 10.272398000 | H | 21.226830000 | 6.126693000  | 11.885635000 |
| H  | 18.063429000 | 6.516357000  | 9.833258000  | H | 20.489806000 | 6.565224000  | 13.462822000 |
| H  | 19.779315000 | 6.004401000  | 9.780224000  | H | 20.741229000 | 7.824681000  | 12.192822000 |

**Table S12:** Optimized geometry of **7a**. XYZ coordinated in angstroms. BP86/def2-SVP level of theory.

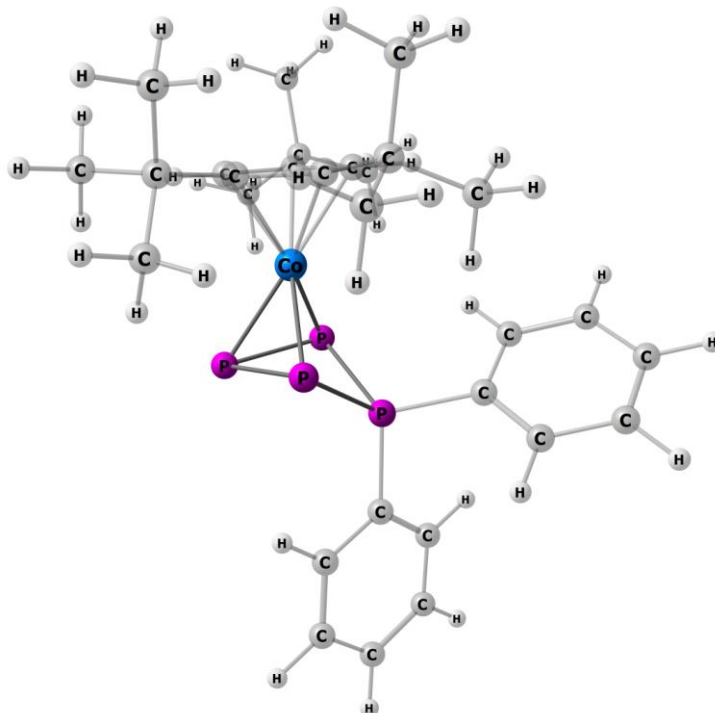

|    |              |              |              |   |              |              |              |
|----|--------------|--------------|--------------|---|--------------|--------------|--------------|
| Co | 0.971229000  | -0.478808000 | 0.309657000  | H | 4.115124000  | 1.269372000  | 4.430569000  |
| P  | -0.158113000 | -2.400286000 | 0.531798000  | C | 4.106564000  | -2.815159000 | -0.720726000 |
| P  | -0.782510000 | -0.623548000 | 1.770560000  | H | 4.920274000  | -2.468224000 | -0.050881000 |
| P  | -0.583647000 | -1.089440000 | -1.255410000 | H | 4.546342000  | -3.555790000 | -1.420872000 |
| C  | 2.915976000  | -0.798949000 | 0.863761000  | H | 3.349406000  | -3.346452000 | -0.108830000 |
| H  | 3.294586000  | -1.701069000 | 1.354416000  | C | 1.542937000  | 1.700428000  | 3.531681000  |
| C  | 0.939566000  | 2.679116000  | -1.756033000 | H | 1.656677000  | 1.878984000  | 4.621721000  |
| H  | -0.014245000 | 2.166324000  | -1.520042000 | H | 0.489403000  | 1.409182000  | 3.341005000  |
| H  | 0.787338000  | 3.297379000  | -2.665036000 | H | 1.738407000  | 2.664019000  | 3.016838000  |
| H  | 1.166951000  | 3.377802000  | -0.926517000 | C | 2.238678000  | -0.696313000 | 3.869309000  |
| C  | 2.413887000  | 0.348908000  | 1.561870000  | H | 2.941065000  | -1.511008000 | 3.598232000  |
| C  | 2.000416000  | 1.280665000  | 0.545911000  | H | 1.205645000  | -1.062959000 | 3.694157000  |
| H  | 1.578192000  | 2.272158000  | 0.738744000  | H | 2.353845000  | -0.507667000 | 4.957612000  |
| C  | 2.855105000  | -0.606077000 | -0.570453000 | P | -2.145714000 | -0.221885000 | 0.061116000  |
| C  | 2.248202000  | 0.732583000  | -0.773610000 | C | -2.365735000 | 3.883058000  | 0.540789000  |
| C  | 2.447095000  | -2.301679000 | -2.485731000 | H | -1.996235000 | 4.630258000  | 1.260986000  |
| H  | 1.714913000  | -2.902913000 | -1.907220000 | C | -2.074416000 | 2.521763000  | 0.737242000  |
| H  | 2.960502000  | -2.987320000 | -3.194209000 | C | -3.123763000 | 4.288837000  | -0.571277000 |
| H  | 1.878977000  | -1.564909000 | -3.079889000 | H | -1.473398000 | 2.202361000  | 1.604027000  |
| C  | 2.080139000  | 1.657636000  | -2.004641000 | C | -2.553905000 | 1.557026000  | -0.174361000 |
| C  | 3.478351000  | -1.651242000 | -1.531730000 | C | -3.597796000 | 3.330628000  | -1.486964000 |
| C  | 1.744919000  | 0.950829000  | -3.335175000 | H | -4.191472000 | 3.646510000  | -2.359578000 |
| H  | 2.552248000  | 0.281100000  | -3.684256000 | C | -3.318132000 | 1.968808000  | -1.290655000 |
| H  | 1.591614000  | 1.713015000  | -4.128084000 | H | -3.696308000 | 1.221657000  | -2.007202000 |
| H  | 0.811303000  | 0.357372000  | -3.249572000 | C | -3.913694000 | -2.302021000 | -0.648554000 |
| C  | 2.516756000  | 0.595572000  | 3.068071000  | H | -3.041472000 | -2.734011000 | -1.165861000 |
| C  | 4.636612000  | -1.007511000 | -2.338471000 | C | -5.145469000 | -2.978907000 | -0.646117000 |
| H  | 4.286329000  | -0.231833000 | -3.045730000 | C | -3.788516000 | -1.058762000 | 0.009363000  |
| H  | 5.165119000  | -1.782673000 | -2.933348000 | H | -5.238044000 | -3.944357000 | -1.168521000 |
| H  | 5.377614000  | -0.535656000 | -1.659623000 | C | -6.253481000 | -2.427060000 | 0.020201000  |
| C  | 3.403986000  | 2.457564000  | -2.167906000 | C | -4.904241000 | -0.508546000 | 0.681904000  |
| H  | 3.634737000  | 3.033976000  | -1.248121000 | H | -4.815195000 | 0.459730000  | 1.200401000  |
| H  | 3.319789000  | 3.176662000  | -3.011064000 | C | -6.130258000 | -1.192819000 | 0.685397000  |
| H  | 4.266603000  | 1.793106000  | -2.371375000 | H | -6.996723000 | -0.758597000 | 1.209411000  |
| C  | 3.972509000  | 1.062501000  | 3.348024000  | H | -7.217755000 | -2.959851000 | 0.022290000  |
| H  | 4.210525000  | 1.990073000  | 2.786589000  | H | -3.347727000 | 5.356295000  | -0.726158000 |
| H  | 4.707890000  | 0.287891000  | 3.046557000  |   |              |              |              |

**Table S13:** Optimized geometry of **7b**. XYZ coordinated in angstroms. BP86/def2-SVP level of theory.

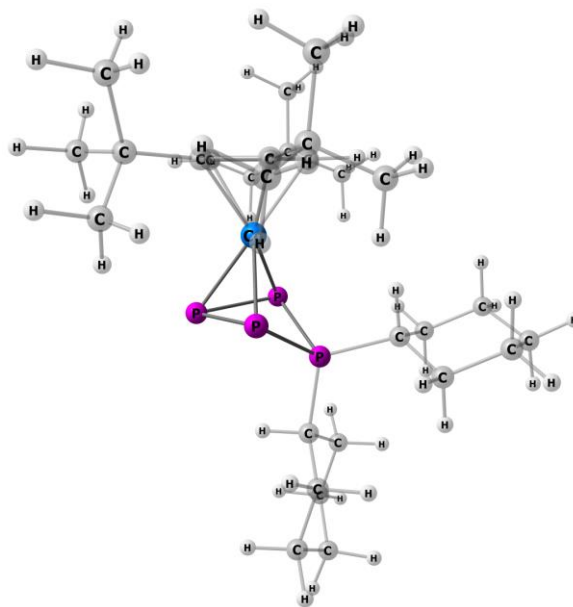

|    |              |              |              |   |              |              |              |
|----|--------------|--------------|--------------|---|--------------|--------------|--------------|
| Co | -1.175790000 | -0.343431000 | -0.417526000 | C | -1.316590000 | 2.944789000  | -2.498180000 |
| P  | -0.141113000 | -2.203538000 | -1.121102000 | H | -1.316434000 | 3.572851000  | -3.414018000 |
| P  | 0.606534000  | -0.215051000 | -1.873743000 | H | -0.322691000 | 2.460991000  | -2.408919000 |
| P  | 0.331392000  | -1.420313000 | 0.939640000  | H | -1.450860000 | 3.625128000  | -1.631565000 |
| C  | -3.064230000 | -0.287355000 | -1.210128000 | C | -2.244505000 | 1.029631000  | -3.846076000 |
| H  | -3.410937000 | -0.879412000 | -2.062915000 | H | -3.066875000 | 0.296837000  | -3.979367000 |
| C  | -1.317764000 | 1.679060000  | 2.801555000  | H | -1.286231000 | 0.470932000  | -3.812384000 |
| H  | -0.344966000 | 1.217212000  | 2.535850000  | H | -2.230930000 | 1.677631000  | -4.747813000 |
| H  | -1.306744000 | 1.901185000  | 3.889113000  | C | 3.505195000  | -1.326380000 | -0.391321000 |
| H  | -1.398023000 | 2.650640000  | 2.274709000  | P | 1.940531000  | -0.317347000 | -0.114804000 |
| C  | -2.477931000 | 1.017530000  | -1.316828000 | C | 2.276178000  | 1.387227000  | 0.592899000  |
| C  | -2.148096000 | 1.421915000  | 0.022411000  | H | 3.903893000  | 2.084782000  | -0.695229000 |
| H  | -1.711756000 | 2.388645000  | 0.295492000  | C | 2.868826000  | 2.388148000  | -0.424077000 |
| C  | -3.125230000 | -0.715217000 | 0.174089000  | H | 2.277827000  | 2.373793000  | -1.365463000 |
| C  | -2.528675000 | 0.386165000  | 0.965187000  | C | 2.898664000  | 3.808670000  | 0.173089000  |
| C  | -2.900710000 | -3.045849000 | 1.281497000  | H | 3.065493000  | -2.188170000 | -0.948502000 |
| H  | -2.128244000 | -3.423186000 | 0.579250000  | C | 4.144760000  | -1.887504000 | 0.896775000  |
| H  | -3.486035000 | -3.920939000 | 1.638261000  | C | 4.551755000  | -0.659232000 | -1.306517000 |
| H  | -2.377490000 | -2.611158000 | 2.150131000  | H | 4.561609000  | -1.054303000 | 1.505246000  |
| C  | -2.492433000 | 0.718504000  | 2.479052000  | H | 3.372929000  | -2.384862000 | 1.523040000  |
| C  | -3.832388000 | -2.038841000 | 0.562137000  | C | 5.277387000  | -2.874359000 | 0.547579000  |
| C  | -2.332103000 | -0.481532000 | 3.436097000  | H | 1.225611000  | 1.704496000  | 0.794292000  |
| H  | -3.178038000 | -1.191446000 | 3.387210000  | C | 3.051349000  | 1.405711000  | 1.926477000  |
| H  | -2.279846000 | -0.111572000 | 4.482014000  | H | 4.070589000  | -0.280197000 | -2.233968000 |
| H  | -1.394968000 | -1.036996000 | 3.227070000  | H | 4.992466000  | 0.222188000  | -0.788053000 |
| C  | -2.437915000 | 1.886251000  | -2.575021000 | C | 5.679566000  | -1.652840000 | -1.650336000 |
| C  | -5.084544000 | -1.736550000 | 1.427923000  | C | 3.084819000  | 2.830128000  | 2.515519000  |
| H  | -4.829195000 | -1.306964000 | 2.415481000  | H | 2.049356000  | 3.129306000  | 2.796701000  |
| H  | -5.658838000 | -2.669833000 | 1.610806000  | H | 3.676734000  | 2.835673000  | 3.456358000  |
| H  | -5.757404000 | -1.020192000 | 0.911534000  | C | 3.656335000  | 3.847227000  | 1.512167000  |
| C  | -3.816693000 | 1.464283000  | 2.809728000  | H | 2.596826000  | 0.696233000  | 2.651416000  |
| H  | -3.922916000 | 2.376688000  | 2.187310000  | H | 4.095581000  | 1.060310000  | 1.753657000  |
| H  | -3.832869000 | 1.771110000  | 3.877770000  | H | 3.356215000  | 4.514028000  | -0.553895000 |
| H  | -4.703882000 | 0.827439000  | 2.623570000  | H | 1.852541000  | 4.158017000  | 0.330346000  |
| C  | -3.809543000 | 2.612176000  | -2.659292000 | H | 5.756690000  | -3.244058000 | 1.479843000  |
| H  | -3.984661000 | 3.243583000  | -1.763284000 | H | 4.837050000  | -3.767561000 | 0.048256000  |
| H  | -4.644084000 | 1.883657000  | -2.726981000 | C | 6.325723000  | -2.236081000 | -0.381450000 |
| H  | -3.850011000 | 3.267580000  | -3.555894000 | H | 4.731865000  | 3.616982000  | 1.330283000  |
| C  | -4.343604000 | -2.763345000 | -0.710031000 | H | 3.628459000  | 4.871371000  | 1.942948000  |
| H  | -5.096275000 | -2.162680000 | -1.261181000 | H | 6.853957000  | -1.421457000 | 0.166737000  |
| H  | -4.828841000 | -3.718267000 | -0.419248000 | H | 7.104750000  | -2.980957000 | -0.652499000 |
| H  | -3.511671000 | -3.008899000 | -1.401427000 | H | 5.257198000  | -2.480497000 | -2.264893000 |
|    |              |              |              | H | 6.444617000  | -1.153286000 | -2.283399000 |



**Table S14:** Optimized geometry of **7c**. XYZ coordinated in angstroms. BP86/def2-SVP level of theory.

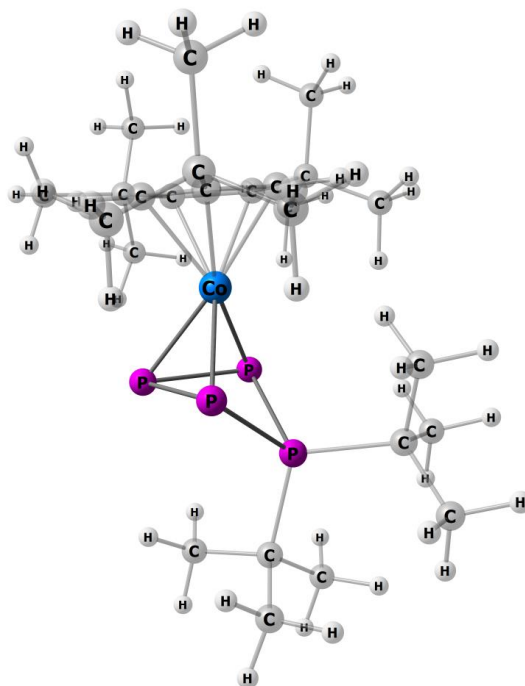

|    |              |              |              |   |              |              |              |
|----|--------------|--------------|--------------|---|--------------|--------------|--------------|
| Co | 0.587850000  | 0.146583000  | -0.338212000 | H | 4.275638000  | -0.261701000 | -2.712604000 |
| P  | -0.908603000 | -1.599684000 | -0.173090000 | H | 2.639579000  | -0.758902000 | -3.280841000 |
| P  | -2.622346000 | -0.164650000 | -0.033751000 | H | 4.002327000  | -1.916274000 | -3.334288000 |
| P  | -0.505729000 | -0.546285000 | -2.129459000 | C | 2.108656000  | -2.863543000 | 1.866401000  |
| P  | -1.285991000 | 1.285200000  | -1.081277000 | H | 1.113347000  | -3.074815000 | 1.424517000  |
| C  | 2.384891000  | 0.834538000  | -1.023092000 | H | 2.184392000  | -3.432380000 | 2.817155000  |
| H  | 2.592952000  | 1.114414000  | -2.060208000 | H | 2.885151000  | -3.262722000 | 1.189184000  |
| C  | 2.133590000  | -0.408362000 | 0.942593000  | C | -1.885322000 | 1.140713000  | 2.328015000  |
| C  | 2.553986000  | -0.498241000 | -0.474302000 | H | -0.917734000 | 0.624800000  | 2.186224000  |
| C  | 1.902047000  | 1.741968000  | -0.021889000 | H | -2.040567000 | 1.331114000  | 3.412957000  |
| C  | -3.064096000 | 0.303918000  | 1.791586000  | H | -1.815329000 | 2.121088000  | 1.814616000  |
| C  | 1.746911000  | 0.970122000  | 1.178466000  | C | -4.979632000 | 0.640886000  | -1.399555000 |
| H  | 1.429166000  | 1.376459000  | 2.144874000  | H | -5.408790000 | 1.158873000  | -0.521263000 |
| C  | 2.277675000  | -1.357650000 | 2.159403000  | H | -5.821560000 | 0.385870000  | -2.080547000 |
| C  | -4.218837000 | -0.649664000 | -1.028521000 | H | -4.320883000 | 1.355140000  | -1.937008000 |
| C  | 4.554448000  | -2.052535000 | -0.681603000 | C | -5.103291000 | -1.625260000 | -0.225588000 |
| H  | 4.425018000  | -2.550806000 | 0.297778000  | H | -4.547114000 | -2.541045000 | 0.064242000  |
| H  | 5.217036000  | -1.174668000 | -0.530777000 | H | -5.955063000 | -1.946927000 | -0.864799000 |
| H  | 5.082845000  | -2.766511000 | -1.348833000 | H | -5.535694000 | -1.173427000 | 0.687973000  |
| C  | 3.206241000  | -1.623315000 | -1.320092000 | C | -3.777754000 | -1.356887000 | -2.326871000 |
| C  | 1.227337000  | -1.019257000 | 3.247954000  | H | -3.172597000 | -0.696383000 | -2.978493000 |
| H  | 1.329283000  | 0.010600000  | 3.643653000  | H | -4.688693000 | -1.656109000 | -2.891245000 |
| H  | 1.348419000  | -1.709800000 | 4.108499000  | H | -3.181900000 | -2.269150000 | -2.123267000 |
| H  | 0.198543000  | -1.139493000 | 2.853820000  | C | 3.686107000  | -1.106057000 | 2.769465000  |
| C  | 2.286756000  | -2.852330000 | -1.526911000 | H | 4.494440000  | -1.343131000 | 2.050420000  |
| H  | 2.842532000  | -3.663255000 | -2.045723000 | H | 3.834754000  | -1.736196000 | 3.672759000  |
| H  | 1.418810000  | -2.579783000 | -2.163026000 | H | 3.804285000  | -0.043732000 | 3.067503000  |
| H  | 1.891159000  | -3.263106000 | -0.582551000 | C | 1.481116000  | 3.683789000  | -1.606364000 |
| C  | 1.806353000  | 3.263114000  | -0.155736000 | H | 0.500464000  | 3.279899000  | -1.935006000 |
| C  | -3.177536000 | -1.003273000 | 2.606587000  | H | 2.255561000  | 3.335727000  | -2.320510000 |
| H  | -4.046567000 | -1.622312000 | 2.310359000  | H | 1.436045000  | 4.790702000  | -1.683343000 |
| H  | -3.294803000 | -0.754638000 | 3.684378000  | C | 0.741716000  | 3.853828000  | 0.793624000  |
| H  | -2.264016000 | -1.625852000 | 2.503917000  | H | 0.728190000  | 4.961422000  | 0.714031000  |
| C  | -4.348196000 | 1.148013000  | 1.916007000  | H | 0.947876000  | 3.601544000  | 1.854546000  |
| H  | -4.287018000 | 2.083962000  | 1.323236000  | H | -0.269012000 | 3.476174000  | 0.536760000  |
| H  | -4.473976000 | 1.444142000  | 2.980990000  | C | 3.199257000  | 3.832137000  | 0.233886000  |
| H  | -5.265726000 | 0.602711000  | 1.621089000  | H | 3.993586000  | 3.437143000  | -0.433019000 |
| C  | 3.546398000  | -1.097448000 | -2.739364000 | H | 3.466836000  | 3.558876000  | 1.275935000  |
|    |              |              |              | H | 3.203983000  | 4.940756000  | 0.156733000  |

**Table S15:** Optimized geometry of **8a**. XYZ coordinated in angstroms. BP86/def2-SVP level of theory.

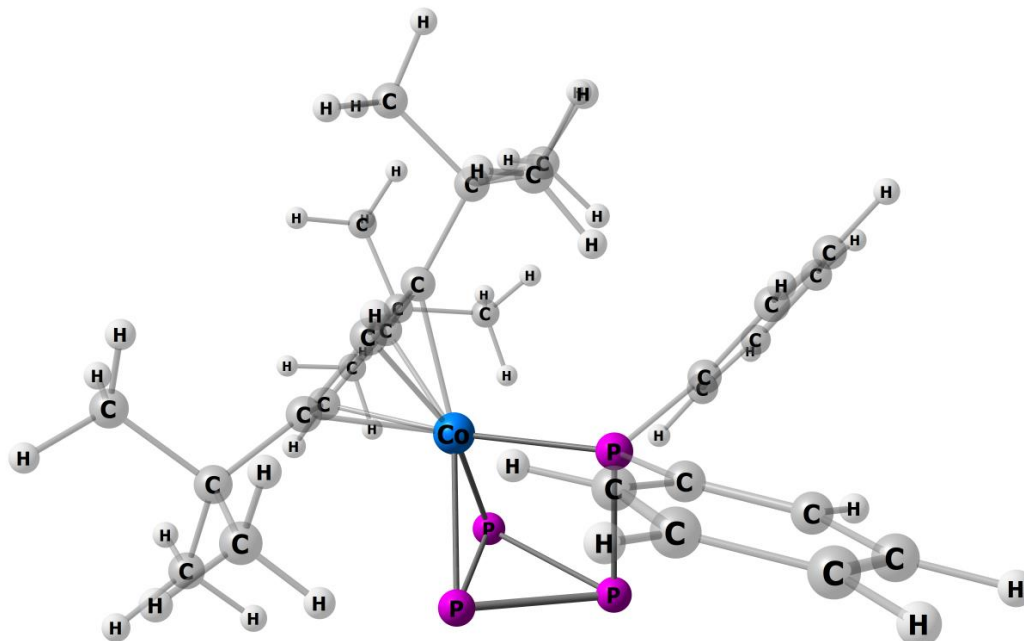

|    |              |              |              |   |              |              |              |
|----|--------------|--------------|--------------|---|--------------|--------------|--------------|
| Co | -0.757059000 | -0.227132000 | -0.456261000 | H | -3.927466000 | 3.070962000  | 1.122053000  |
| P  | 1.440753000  | -0.330013000 | -0.536351000 | H | -3.337172000 | 4.552740000  | 0.300204000  |
| P  | -0.566189000 | -1.846089000 | -2.119749000 | H | -2.353930000 | 3.792735000  | 1.583397000  |
| P  | 1.414499000  | -0.870168000 | -2.699528000 | C | 3.324961000  | 3.305479000  | -1.214424000 |
| P  | -0.581326000 | 0.238126000  | -2.726176000 | H | 3.288468000  | 4.081350000  | -1.995738000 |
| C  | -1.276208000 | 0.789334000  | 1.323466000  | C | -1.556617000 | -0.639901000 | 1.426230000  |
| C  | -0.523977000 | 1.464616000  | 2.497348000  | H | -1.147482000 | -1.295999000 | 2.201886000  |
| C  | 3.416127000  | 1.309934000  | 0.760064000  | C | -3.907727000 | -2.580683000 | -1.015854000 |
| H  | 3.468379000  | 0.531861000  | 1.537284000  | H | -4.435499000 | -3.556953000 | -1.043522000 |
| C  | 4.209921000  | 2.463670000  | 0.886069000  | H | -3.157987000 | -2.577807000 | -1.835034000 |
| H  | 4.868966000  | 2.576872000  | 1.761857000  | H | -4.659140000 | -1.793738000 | -1.233818000 |
| C  | 3.783770000  | -1.864604000 | 0.053606000  | C | 4.459049000  | -2.973597000 | 0.588494000  |
| H  | 4.341576000  | -1.120959000 | -0.537798000 | H | 5.541061000  | -3.088736000 | 0.414841000  |
| C  | 2.530343000  | 2.154551000  | -1.343341000 | C | -2.501568000 | -1.039251000 | 0.436394000  |
| H  | 1.877443000  | 2.038187000  | -2.223622000 | C | -2.310267000 | -3.565596000 | 0.668521000  |
| C  | 2.565670000  | 1.140704000  | -0.357339000 | H | -1.830532000 | -3.467840000 | 1.664783000  |
| C  | -3.245485000 | -2.374551000 | 0.364656000  | H | -1.509562000 | -3.650789000 | -0.094486000 |
| C  | -2.770762000 | 0.141364000  | -0.339101000 | H | -2.885729000 | -4.515248000 | 0.672832000  |
| H  | -3.433672000 | 0.165986000  | -1.209818000 | C | -1.068164000 | 3.426942000  | -0.901266000 |
| C  | 0.514650000  | 0.489709000  | 3.110574000  | H | -0.248338000 | 3.468925000  | -0.165166000 |
| H  | 0.043136000  | -0.390936000 | 3.590026000  | H | -1.317045000 | 4.467989000  | -1.199807000 |
| H  | 1.097015000  | 1.011057000  | 3.898042000  | H | -0.684429000 | 2.895704000  | -1.795632000 |
| H  | 1.227536000  | 0.120135000  | 2.347499000  | C | -3.326482000 | 2.642407000  | -1.554751000 |
| C  | -4.358689000 | -2.316480000 | 1.448189000  | H | -2.926426000 | 2.030456000  | -2.389664000 |
| H  | -5.045378000 | -1.462620000 | 1.271891000  | H | -3.499809000 | 3.665413000  | -1.948659000 |
| H  | -3.927514000 | -2.199936000 | 2.464135000  | H | -4.312570000 | 2.230693000  | -1.256095000 |
| H  | -4.961113000 | -3.249943000 | 1.435086000  | C | 4.166155000  | 3.465556000  | -0.098616000 |
| C  | -2.059033000 | 1.293110000  | 0.190411000  | H | 4.790060000  | 4.368007000  | 0.000626000  |
| C  | -2.333666000 | 2.715209000  | -0.364573000 | C | 2.375536000  | -3.791187000 | 1.541288000  |
| C  | 1.696584000  | -2.682330000 | 1.005930000  | H | 1.818508000  | -4.546798000 | 2.118097000  |
| H  | 0.609762000  | -2.572403000 | 1.143557000  | C | 0.227320000  | 2.771748000  | 2.168920000  |
| C  | 2.394059000  | -1.703700000 | 0.266695000  | H | 0.993433000  | 2.622251000  | 1.383587000  |
| C  | 3.757873000  | -3.937803000 | 1.336641000  | H | 0.750203000  | 3.129560000  | 3.080545000  |
| H  | 4.290686000  | -4.806970000 | 1.754287000  | H | -2.120923000 | 0.832914000  | 3.894578000  |
| C  | -1.588661000 | 1.759299000  | 3.594641000  | C | -3.021672000 | 3.577336000  | 0.727685000  |
| H  | -2.348324000 | 2.486615000  | 3.247304000  | H | -0.450491000 | 3.583627000  | 1.848313000  |
| H  | -1.099405000 | 2.180672000  | 4.498935000  |   |              |              |              |

**Table S16:** Optimized geometry of **8b**. XYZ coordinated in angstroms. BP86/def2-SVP level of theory.

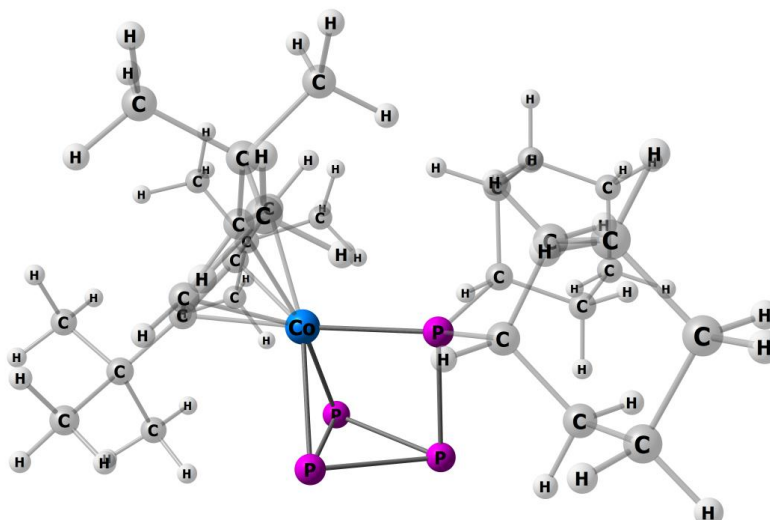

|    |              |              |              |   |              |              |              |
|----|--------------|--------------|--------------|---|--------------|--------------|--------------|
| P  | 0.593828000  | 1.042595000  | -2.513641000 | H | -0.727075000 | 4.088809000  | 2.376755000  |
| P  | 0.973996000  | -1.085130000 | -2.243531000 | H | -1.106889000 | 2.919052000  | 1.066278000  |
| P  | -1.130320000 | -0.436869000 | -2.788957000 | H | 0.375452000  | 3.911600000  | 0.975481000  |
| Co | 0.824742000  | 0.238552000  | -0.354009000 | C | -0.458881000 | 1.499825000  | 3.389117000  |
| C  | 1.195288000  | 1.300159000  | 1.475361000  | H | 0.104801000  | 0.815428000  | 4.056520000  |
| C  | 2.090831000  | 1.683190000  | 0.437112000  | H | -1.204167000 | 0.890278000  | 2.839902000  |
| H  | 2.204624000  | 2.706619000  | 0.065525000  | H | -1.011311000 | 2.213114000  | 4.035940000  |
| C  | 1.363752000  | -0.124301000 | 1.624769000  | C | -2.717247000 | 1.190522000  | -0.454353000 |
| H  | 0.821434000  | -0.739034000 | 2.351612000  | P | -1.369302000 | -0.160594000 | -0.593780000 |
| C  | 2.880244000  | 0.551531000  | -0.016464000 | C | -2.069183000 | -1.810657000 | 0.023769000  |
| C  | 2.396119000  | -0.620891000 | 0.749192000  | H | -4.216226000 | -1.582945000 | -0.309683000 |
| C  | 0.484868000  | 2.258315000  | 2.432233000  | C | -3.392699000 | -2.260231000 | -0.629853000 |
| C  | 2.900654000  | -2.071788000 | 0.955250000  | H | -3.324343000 | -2.177832000 | -1.736482000 |
| C  | 1.707102000  | -3.019356000 | 1.241013000  | C | -3.747085000 | -3.705075000 | -0.223509000 |
| H  | 1.154841000  | -2.750540000 | 2.163627000  | H | -2.091056000 | 2.110535000  | -0.518209000 |
| H  | 2.077343000  | -4.056807000 | 1.377906000  | C | -3.484904000 | 1.227078000  | 0.884058000  |
| H  | 0.990280000  | -3.015000000 | 0.394711000  | C | -3.711395000 | 1.237326000  | -1.637837000 |
| C  | 4.128770000  | 0.796142000  | -0.912107000 | H | -4.113452000 | 0.312849000  | 0.972663000  |
| C  | 3.823514000  | -2.063911000 | 2.207449000  | H | -2.783926000 | 1.210766000  | 1.743224000  |
| H  | 4.704160000  | -1.406830000 | 2.061083000  | C | -4.397299000 | 2.466621000  | 0.976510000  |
| H  | 4.193831000  | -3.089246000 | 2.422417000  | H | -1.265130000 | -2.494274000 | -0.339280000 |
| H  | 3.279687000  | -1.700641000 | 3.103871000  | C | -2.127027000 | -1.958913000 | 1.559402000  |
| C  | 1.592780000  | 2.936725000  | 3.288188000  | H | -3.162642000 | 1.241816000  | -2.604284000 |
| H  | 2.274339000  | 3.542404000  | 2.656290000  | H | -4.339956000 | 0.318998000  | -1.639957000 |
| H  | 2.207007000  | 2.181449000  | 3.821178000  | C | -4.622109000 | 2.478045000  | -1.549287000 |
| H  | 1.139412000  | 3.609026000  | 4.048009000  | C | -2.481711000 | -3.404539000 | 1.960094000  |
| C  | 5.392707000  | 0.522326000  | -0.052199000 | H | -1.653871000 | -4.081307000 | 1.646819000  |
| H  | 5.368589000  | 1.107112000  | 0.891227000  | H | -2.548924000 | -3.485952000 | 3.066948000  |
| H  | 6.305837000  | 0.815496000  | -0.613055000 | C | -3.793650000 | -3.870563000 | 1.305246000  |
| H  | 5.495905000  | -0.546880000 | 0.215708000  | H | -1.154392000 | -1.664339000 | 2.004866000  |
| C  | 3.672401000  | -2.697104000 | -0.224899000 | H | -2.891510000 | -1.269641000 | 1.980024000  |
| H  | 3.060821000  | -2.705351000 | -1.149882000 | H | -4.718431000 | -3.998512000 | -0.677644000 |
| H  | 3.925601000  | -3.749861000 | 0.021061000  | H | -2.983630000 | -4.397895000 | -0.646167000 |
| H  | 4.625325000  | -2.177870000 | -0.437366000 | H | -4.952219000 | 2.454639000  | 1.939948000  |
| C  | 4.197440000  | 2.286708000  | -1.339362000 | H | -3.763518000 | 3.382837000  | 0.993492000  |
| H  | 3.300683000  | 2.590911000  | -1.917700000 | C | -5.372856000 | 2.544096000  | -0.209040000 |
| H  | 5.080784000  | 2.438007000  | -1.993714000 | H | -4.639322000 | -3.269203000 | 1.712857000  |
| H  | 4.308059000  | 2.970447000  | -0.472982000 | H | -4.007175000 | -4.927636000 | 1.574715000  |
| C  | 4.191696000  | -0.020447000 | -2.224967000 | H | -6.091050000 | 1.693701000  | -0.148444000 |
| H  | 4.095305000  | -1.108098000 | -2.072656000 | H | -5.983769000 | 3.470925000  | -0.149811000 |
| H  | 5.166676000  | 0.163571000  | -2.725531000 | H | -3.998410000 | 3.393903000  | -1.667846000 |
| H  | 3.391424000  | 0.289958000  | -2.925915000 | H | -5.338681000 | 2.478387000  | -2.399094000 |
| C  | -0.287489000 | 3.354525000  | 1.668767000  |   |              |              |              |

**Table S16:** Optimized geometry of **8c**. XYZ coordinated in angstroms. BP86/def2-SVP level of theory.

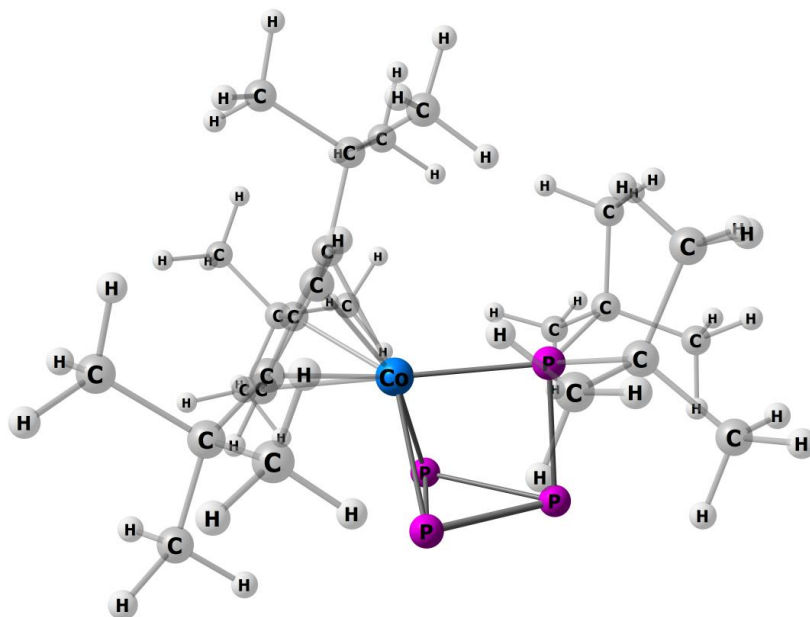

|    |              |              |              |   |              |              |              |
|----|--------------|--------------|--------------|---|--------------|--------------|--------------|
| Co | 0.274398000  | 0.320457000  | -0.352421000 | H | 1.080806000  | -3.449849000 | -0.884517000 |
| P  | -1.981430000 | -0.016058000 | -0.032667000 | H | 2.074317000  | -3.756033000 | -2.339882000 |
| P  | -0.473731000 | 2.100224000  | -1.650685000 | H | 0.812917000  | -2.479458000 | -2.361019000 |
| P  | -2.361954000 | 0.899981000  | -2.039718000 | C | 3.188031000  | -1.280670000 | -2.594457000 |
| P  | -0.286092000 | 0.161332000  | -2.597395000 | H | 2.402539000  | -0.722804000 | -3.145350000 |
| C  | 1.497521000  | -0.841963000 | 0.992389000  | H | 3.556521000  | -2.084515000 | -3.265192000 |
| C  | 1.348798000  | -1.933323000 | 2.080230000  | H | 4.038962000  | -0.595906000 | -2.401689000 |
| C  | 2.319648000  | 2.894784000  | 0.626745000  | C | 1.051103000  | -3.365155000 | 1.588599000  |
| C  | 2.277011000  | 0.584736000  | -0.667442000 | H | 0.126563000  | -3.411351000 | 0.980773000  |
| H  | 2.687643000  | 0.954993000  | -1.612293000 | H | 0.910854000  | -4.032723000 | 2.464558000  |
| C  | 0.226863000  | -1.547262000 | 3.078904000  | H | 1.875476000  | -3.790937000 | 0.987661000  |
| H  | 0.481577000  | -0.650096000 | 3.677339000  | C | -2.907755000 | -1.742826000 | -0.199291000 |
| H  | 0.054443000  | -2.375415000 | 3.797249000  | H | -1.149310000 | -2.588565000 | -1.228007000 |
| H  | -0.723018000 | -1.345493000 | 2.547746000  | H | -2.401290000 | -1.962743000 | -2.342327000 |
| C  | 3.591180000  | 2.871910000  | 1.522141000  | H | -2.681141000 | -3.501318000 | -1.461144000 |
| H  | 4.396428000  | 2.263338000  | 1.060461000  | H | -4.552327000 | -0.863565000 | -1.391671000 |
| H  | 3.372366000  | 2.442420000  | 2.521691000  | H | -4.972507000 | -1.140041000 | 0.337033000  |
| H  | 3.979599000  | 3.902725000  | 1.667513000  | H | -4.851821000 | -2.522095000 | -0.787561000 |
| C  | 2.076507000  | -0.818179000 | -0.348964000 | C | -2.241254000 | -2.482931000 | -1.376621000 |
| C  | 2.638322000  | -1.916926000 | -1.290236000 | C | -4.400788000 | -1.539536000 | -0.523732000 |
| C  | 2.689959000  | -1.957502000 | 2.871703000  | C | -2.767043000 | -2.622226000 | 1.058921000  |
| H  | 3.541270000  | -2.257112000 | 2.229192000  | H | -3.243020000 | -2.186144000 | 1.956155000  |
| H  | 2.625222000  | -2.679425000 | 3.713990000  | H | -3.259913000 | -3.601591000 | 0.868115000  |
| H  | 2.921752000  | -0.957969000 | 3.293351000  | H | -1.708390000 | -2.833241000 | 1.299793000  |
| C  | 3.844848000  | -2.611358000 | -0.602683000 | C | -3.000784000 | 1.117577000  | 1.211818000  |
| H  | 4.606441000  | -1.865320000 | -0.293337000 | H | -2.491367000 | -0.100190000 | 2.991606000  |
| H  | 4.329711000  | -3.319134000 | -1.308209000 | H | -4.143619000 | -0.409911000 | 2.349170000  |
| H  | 3.552134000  | -3.187251000 | 0.295714000  | H | -3.794750000 | 1.098453000  | 3.235075000  |
| C  | 1.371320000  | 0.550920000  | 1.419224000  | H | -5.022104000 | 0.916813000  | 0.299952000  |
| H  | 1.001108000  | 0.863903000  | 2.402218000  | H | -4.046412000 | 2.266486000  | -0.363436000 |
| C  | 2.680651000  | 3.561841000  | -0.719401000 | H | -4.761921000 | 2.394425000  | 1.272166000  |
| H  | 2.963738000  | 4.622468000  | -0.554044000 | C | -3.372413000 | 0.369373000  | 2.508092000  |
| H  | 1.824865000  | 3.545831000  | -1.426039000 | C | -4.276215000 | 1.691954000  | 0.558389000  |
| H  | 3.542349000  | 3.063131000  | -1.209597000 | C | -2.081237000 | 2.295898000  | 1.582484000  |
| C  | 1.910667000  | 1.430327000  | 0.437683000  | H | -1.808455000 | 2.899120000  | 0.693907000  |
| C  | 1.228447000  | 3.726375000  | 1.329680000  | H | -2.613233000 | 2.962931000  | 2.296747000  |
| H  | 0.930768000  | 3.281795000  | 2.301696000  | C | 1.588538000  | -2.962198000 | -1.733060000 |
| H  | 0.323679000  | 3.808184000  | 0.696137000  | H | -1.142869000 | 1.954609000  | 2.059380000  |
| H  | 1.601224000  | 4.752199000  | 1.534553000  |   |              |              |              |

**Table S17:** Optimized geometry of **9a**. XYZ coordinated in angstroms. BP86/def2-SVP level of theory.

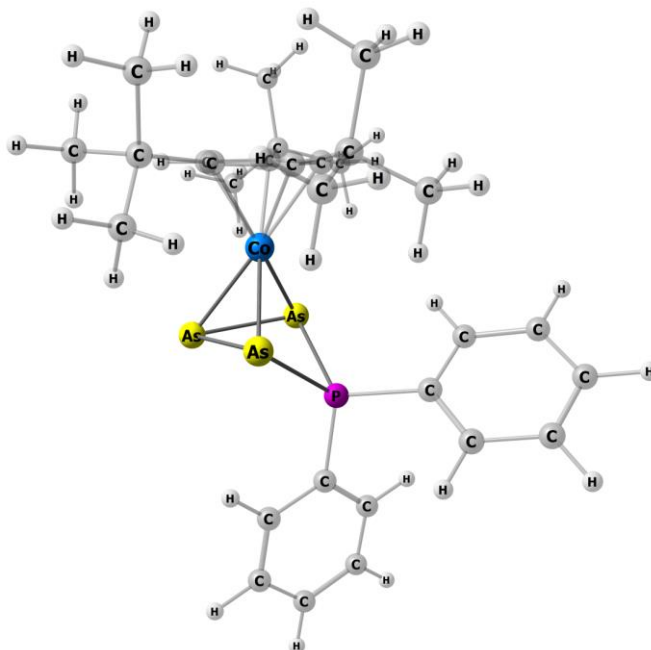

|    |              |              |              |   |              |              |              |
|----|--------------|--------------|--------------|---|--------------|--------------|--------------|
| Co | 1.110367000  | -0.340810000 | 0.180337000  | H | 4.469336000  | -0.022337000 | 4.501280000  |
| As | -0.080701000 | -2.375905000 | -0.062378000 | C | 4.150035000  | -2.306970000 | -1.613186000 |
| As | -0.704692000 | -0.734159000 | 1.666751000  | H | 4.978249000  | -2.224387000 | -0.879694000 |
| As | -0.508471000 | -0.463988000 | -1.563389000 | H | 4.557390000  | -2.803612000 | -2.518461000 |
| C  | 3.061397000  | -0.842270000 | 0.548831000  | H | 3.370781000  | -2.973997000 | -1.190612000 |
| H  | 3.434778000  | -1.855264000 | 0.729967000  | C | 1.920846000  | 0.813702000  | 3.903324000  |
| C  | 1.104031000  | 3.298314000  | -0.841748000 | H | 2.068529000  | 0.643508000  | 4.990616000  |
| H  | 0.140736000  | 2.751812000  | -0.797228000 | H | 0.841145000  | 0.686030000  | 3.680974000  |
| H  | 0.972912000  | 4.181219000  | -1.501301000 | H | 2.194024000  | 1.868690000  | 3.693084000  |
| H  | 1.324844000  | 3.685480000  | 0.172933000  | C | 2.431865000  | -1.621012000 | 3.490145000  |
| C  | 2.612785000  | 0.046571000  | 1.581065000  | H | 3.044364000  | -2.364124000 | 2.939328000  |
| C  | 2.187167000  | 1.244672000  | 0.907887000  | H | 1.363736000  | -1.849455000 | 3.291158000  |
| H  | 1.792803000  | 2.135272000  | 1.408550000  | H | 2.615522000  | -1.775605000 | 4.574460000  |
| C  | 2.973055000  | -0.218496000 | -0.756839000 | P | -2.202406000 | 0.045854000  | 0.006016000  |
| C  | 2.392292000  | 1.125954000  | -0.524479000 | C | -2.414816000 | 3.965597000  | 1.326688000  |
| C  | 2.533065000  | -1.192484000 | -3.119519000 | H | -1.985850000 | 4.560068000  | 2.148987000  |
| H  | 1.782532000  | -1.934435000 | -2.775245000 | C | -2.105054000 | 2.598453000  | 1.219338000  |
| H  | 3.034867000  | -1.616023000 | -4.016214000 | C | -3.268362000 | 4.571209000  | 0.388231000  |
| H  | 1.990719000  | -0.284370000 | -3.434257000 | H | -1.430770000 | 2.122085000  | 1.950194000  |
| C  | 2.236422000  | 2.396643000  | -1.398049000 | C | -2.657777000 | 1.824184000  | 0.176128000  |
| C  | 3.569949000  | -0.922127000 | -2.003614000 | C | -3.816764000 | 3.805874000  | -0.658252000 |
| C  | 1.906975000  | 2.162588000  | -2.888052000 | H | -4.485204000 | 4.277747000  | -1.396101000 |
| H  | 2.702254000  | 1.613996000  | -3.425400000 | C | -3.516350000 | 2.438757000  | -0.765883000 |
| H  | 1.791052000  | 3.143514000  | -3.395475000 | H | -3.953060000 | 1.843828000  | -1.584301000 |
| H  | 0.953728000  | 1.607234000  | -3.011354000 | C | -3.942277000 | -1.849015000 | -1.162339000 |
| C  | 2.783892000  | -0.171615000 | 3.085950000  | H | -3.076437000 | -2.115409000 | -1.790237000 |
| C  | 4.756880000  | -0.088711000 | -2.556275000 | C | -5.158992000 | -2.539580000 | -1.298638000 |
| H  | 4.437016000  | 0.887883000  | -2.967300000 | C | -3.823287000 | -0.804286000 | -0.219613000 |
| H  | 5.267197000  | -0.641443000 | -3.373922000 | H | -5.246205000 | -3.348408000 | -2.041490000 |
| H  | 5.505171000  | 0.108940000  | -1.760464000 | C | -6.258807000 | -2.200569000 | -0.491529000 |
| C  | 3.570599000  | 3.190108000  | -1.294233000 | C | -4.931263000 | -0.468436000 | 0.593437000  |
| H  | 3.803832000  | 3.436142000  | -0.237721000 | H | -4.846994000 | 0.342966000  | 1.334345000  |
| H  | 3.500544000  | 4.143368000  | -1.861391000 | C | -6.142156000 | -1.165361000 | 0.455083000  |
| H  | 4.425571000  | 2.613817000  | -1.700023000 | H | -7.001563000 | -0.897862000 | 1.090559000  |
| C  | 4.280605000  | 0.092760000  | 3.412245000  | H | -7.210923000 | -2.744280000 | -0.598927000 |
| H  | 4.577559000  | 1.121265000  | 3.118704000  | H | -3.508307000 | 5.643175000  | 0.471350000  |
| H  | 4.942086000  | -0.616021000 | 2.872217000  |   |              |              |              |

**Table S18:** Optimized geometry of **9b**. XYZ coordinated in angstroms. BP86/def2-SVP level of theory.

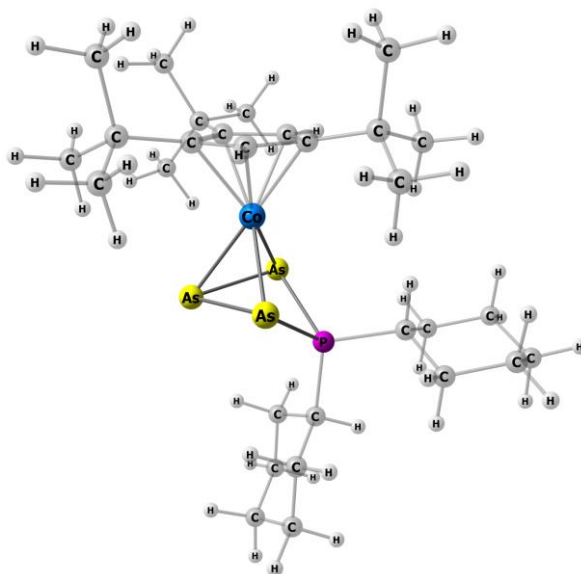

|    |              |              |              |   |              |              |              |
|----|--------------|--------------|--------------|---|--------------|--------------|--------------|
| As | -0.512186000 | -0.347103000 | -1.661983000 |   |              |              |              |
| As | -0.337826000 | -0.567806000 | 1.598091000  | H | 3.436582000  | 4.299375000  | -0.151465000 |
| As | 0.346866000  | -2.131342000 | -0.187954000 | H | 2.423818000  | 5.300370000  | -1.249464000 |
| Co | 1.234458000  | 0.058171000  | -0.086130000 | H | 3.310144000  | 3.873465000  | -1.887710000 |
| P  | -2.079170000 | -0.087764000 | 0.081348000  | C | 4.235454000  | -2.498441000 | -0.800612000 |
| C  | 2.582286000  | 1.009470000  | -1.300865000 | H | 4.806421000  | -2.473206000 | 0.145877000  |
| H  | 2.519278000  | 1.096371000  | -2.391928000 | H | 4.798994000  | -3.149638000 | -1.501687000 |
| C  | 2.041295000  | 1.969183000  | -0.374972000 | H | 3.254549000  | -2.978521000 | -0.604842000 |
| C  | 3.091061000  | 0.201801000  | 0.839317000  | C | 3.153454000  | -1.891343000 | 2.376411000  |
| C  | 3.231748000  | -0.085470000 | -0.604869000 | H | 2.063155000  | -1.876796000 | 2.585802000  |
| C  | 0.586074000  | 3.342116000  | -1.941931000 | H | 3.658653000  | -2.325310000 | 3.266510000  |
| H  | 1.098189000  | 2.925510000  | -2.833628000 | H | 3.319254000  | -2.572131000 | 1.524826000  |
| H  | 0.255597000  | 4.371304000  | -2.198561000 | C | 5.453334000  | -0.475112000 | -1.688476000 |
| H  | -0.311587000 | 2.717683000  | -1.754887000 | H | 5.363387000  | 0.503276000  | -2.204148000 |
| C  | 2.340813000  | 1.444765000  | 0.926323000  | H | 6.069562000  | -1.144685000 | -2.326292000 |
| H  | 2.050112000  | 1.927685000  | 1.864537000  | H | 6.003896000  | -0.304187000 | -0.741916000 |
| C  | 4.053440000  | -1.103248000 | -1.434021000 | C | -3.614436000 | -1.206190000 | 0.063094000  |
| C  | 1.511923000  | 3.363854000  | -0.706178000 | H | -4.447971000 | -0.544074000 | 0.396793000  |
| C  | 0.750040000  | 3.966816000  | 0.493522000  | C | 3.295623000  | 0.374152000  | 3.368642000  |
| H  | -0.088827000 | 3.311354000  | 0.807295000  | H | 3.697422000  | 1.407309000  | 3.324533000  |
| H  | 0.333273000  | 4.961455000  | 0.228849000  | H | 3.717994000  | -0.109406000 | 4.273986000  |
| H  | 1.412345000  | 4.109282000  | 1.372253000  | H | 2.195838000  | 0.430284000  | 3.506448000  |
| C  | -2.754900000 | 1.659442000  | 0.257202000  | C | -3.928809000 | -1.705846000 | -1.364109000 |
| H  | -1.829222000 | 2.277002000  | 0.205923000  | H | -4.034846000 | -0.849204000 | -2.064059000 |
| C  | -5.110428000 | -3.742037000 | -0.388080000 | H | -3.061231000 | -2.298353000 | -1.733009000 |
| H  | -4.309588000 | -4.442159000 | -0.719435000 | C | -5.201895000 | -2.573035000 | -1.384269000 |
| H  | -6.056078000 | -4.326296000 | -0.388713000 | H | -6.081812000 | -1.938843000 | -1.126407000 |
| C  | 5.226666000  | -0.452360000 | 2.039173000  | H | -5.382587000 | -2.950555000 | -2.414073000 |
| H  | 5.614817000  | -1.096624000 | 1.227096000  | C | -3.678780000 | 2.079279000  | -0.906101000 |
| H  | 5.660636000  | -0.821958000 | 2.992799000  | H | -4.575841000 | 1.418828000  | -0.929308000 |
| H  | 5.610331000  | 0.575008000  | 1.866661000  | H | -3.158012000 | 1.939724000  | -1.878392000 |
| C  | -3.509412000 | -2.384384000 | 1.055237000  | C | -3.415657000 | 1.901587000  | 1.632053000  |
| H  | -2.631471000 | -3.011114000 | 0.780959000  | H | -4.294553000 | 1.226262000  | 1.749361000  |
| H  | -3.309414000 | -2.009757000 | 2.082063000  | H | -2.706294000 | 1.639791000  | 2.447172000  |
| C  | 3.380211000  | -1.342559000 | -2.811586000 | C | -4.141385000 | 3.541523000  | -0.747960000 |
| H  | 2.339126000  | -1.707199000 | -2.689430000 | H | -3.260291000 | 4.215315000  | -0.850491000 |
| H  | 3.948315000  | -2.110633000 | -3.376744000 | H | -4.835606000 | 3.808680000  | -1.573924000 |
| H  | 3.354401000  | -0.432342000 | -3.443202000 | C | -3.885314000 | 3.363037000  | 1.775110000  |
| C  | 3.676481000  | -0.457126000 | 2.115369000  | H | -4.397358000 | 3.500105000  | 2.752132000  |
| C  | -4.787631000 | -3.243569000 | 1.031041000  | H | -2.994144000 | 4.031223000  | 1.794250000  |
| H  | -4.675590000 | -4.101169000 | 1.729214000  | C | -4.809009000 | 3.779854000  | 0.617562000  |
| H  | -5.644469000 | -2.641448000 | 1.413996000  | H | -5.753203000 | 3.189586000  | 0.670997000  |
| C  | 2.742548000  | 4.261388000  | -1.016616000 | H | -5.103888000 | 4.846215000  | 0.723106000  |

**Table S19:** Optimized geometry of **9c**. XYZ coordinated in angstroms. BP86/def2-SVP level of theory.

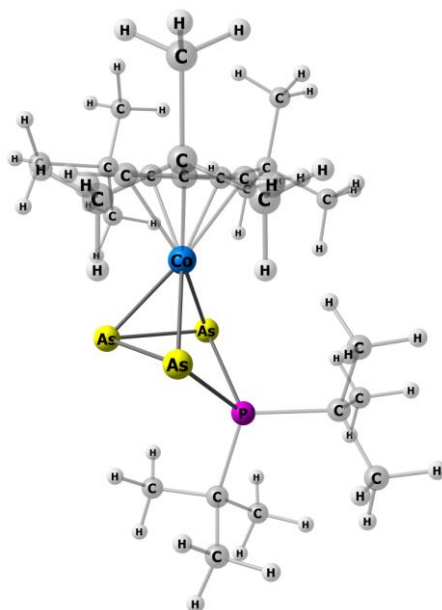

|    |              |              |              |   |              |              |              |
|----|--------------|--------------|--------------|---|--------------|--------------|--------------|
| As | -1.175650000 | 1.469985000  | -0.820110000 | H | 4.208085000  | -1.781318000 | -3.240456000 |
| As | -0.768838000 | -1.633143000 | -0.009151000 | H | 4.462498000  | -0.139677000 | -2.578976000 |
| As | -0.364976000 | -0.443857000 | -2.138572000 | C | 4.774374000  | -1.958786000 | -0.586842000 |
| Co | 0.773726000  | 0.193316000  | -0.196290000 | H | 5.417255000  | -1.068543000 | -0.424093000 |
| P  | -2.594523000 | -0.123726000 | 0.213487000  | H | 5.317725000  | -2.651494000 | -1.264512000 |
| C  | 2.743293000  | -0.456834000 | -0.343101000 | H | 4.656957000  | -2.472423000 | 0.386062000  |
| C  | 2.580445000  | 0.895075000  | -0.848948000 | C | 1.376408000  | -1.121022000 | 3.337839000  |
| H  | 2.804608000  | 1.209320000  | -1.872904000 | H | 1.421876000  | -0.093793000 | 3.749860000  |
| C  | 2.100977000  | 1.772511000  | 0.180117000  | H | 1.512225000  | -1.819108000 | 4.190191000  |
| C  | 1.927346000  | 0.957900000  | 1.349671000  | H | 0.362672000  | -1.282992000 | 2.918750000  |
| H  | 1.601648000  | 1.331390000  | 2.326854000  | C | 2.348008000  | -2.897371000 | 1.931675000  |
| C  | 2.040579000  | 3.300097000  | 0.107351000  | H | 1.366185000  | -3.134684000 | 1.472655000  |
| C  | 2.314318000  | -0.413663000 | 1.072123000  | H | 2.429257000  | -3.486143000 | 2.869772000  |
| C  | -3.815861000 | -1.216075000 | -2.093314000 | H | 3.146999000  | -3.253904000 | 1.256793000  |
| H  | -3.222297000 | -0.527850000 | -2.726850000 | C | 3.849170000  | -1.118629000 | 2.909494000  |
| H  | -4.741346000 | -1.485682000 | -2.649046000 | H | 4.677176000  | -1.306881000 | 2.197905000  |
| H  | -3.218502000 | -2.138013000 | -1.945604000 | H | 4.002259000  | -1.772302000 | 3.795108000  |
| C  | 2.528727000  | -2.796193000 | -1.453317000 | H | 3.928631000  | -0.063317000 | 3.242702000  |
| H  | 2.161509000  | -3.254995000 | -0.519612000 | C | -5.079161000 | -1.576098000 | 0.034587000  |
| H  | 3.100610000  | -3.570715000 | -2.008876000 | H | -4.511285000 | -2.499289000 | 0.273893000  |
| H  | 1.643127000  | -2.528465000 | -2.066926000 | H | -5.947881000 | -1.877566000 | -0.591744000 |
| C  | 3.415695000  | -1.548704000 | -1.216685000 | H | -5.486716000 | -1.161040000 | 0.976895000  |
| C  | -1.785461000 | 1.101063000  | 2.600103000  | C | -3.079488000 | -1.047161000 | 2.853016000  |
| H  | -0.816820000 | 0.610517000  | 2.387791000  | H | -3.949716000 | -1.660888000 | 2.549044000  |
| H  | -1.891788000 | 1.231201000  | 3.699798000  | H | -3.185114000 | -0.830082000 | 3.939056000  |
| H  | -1.751242000 | 2.109658000  | 2.139598000  | H | -2.165392000 | -1.663644000 | 2.723053000  |
| C  | -2.981619000 | 0.281402000  | 2.072408000  | C | -4.258583000 | 1.124900000  | 2.260070000  |
| C  | 1.025256000  | 3.880209000  | 1.115458000  | H | -4.213522000 | 2.074302000  | 1.687612000  |
| H  | -0.002198000 | 3.524132000  | 0.895375000  | H | -4.350440000 | 1.395538000  | 3.335453000  |
| H  | 1.024901000  | 4.989541000  | 1.065857000  | H | -5.185923000 | 0.587806000  | 1.980537000  |
| H  | 1.272752000  | 3.596416000  | 2.159350000  | C | 3.459682000  | 3.819147000  | 0.472672000  |
| C  | -4.221004000 | -0.566143000 | -0.754500000 | H | 3.753931000  | 3.494922000  | 1.492621000  |
| C  | 2.460683000  | -1.394718000 | 2.264623000  | H | 3.489772000  | 4.929657000  | 0.442370000  |
| C  | -4.998662000 | 0.733509000  | -1.052291000 | H | 4.221532000  | 3.434588000  | -0.236786000 |
| H  | -5.398181000 | 1.219333000  | -0.142356000 | C | 1.683553000  | 3.788533000  | -1.314183000 |
| H  | -5.863725000 | 0.498845000  | -1.711635000 | H | 2.417611000  | 3.438640000  | -2.068829000 |
| H  | -4.361801000 | 1.468298000  | -1.588374000 | H | 1.677706000  | 4.898455000  | -1.349099000 |
| C  | 3.743907000  | -0.983630000 | -2.623710000 | H | 0.677397000  | 3.436358000  | -1.624814000 |
| H  | 2.831013000  | -0.642156000 | -3.153354000 |   |              |              |              |

**Table S20:** Optimized geometry of **10a**. XYZ coordinated in angstroms. BP86/def2-SVP level of theory.

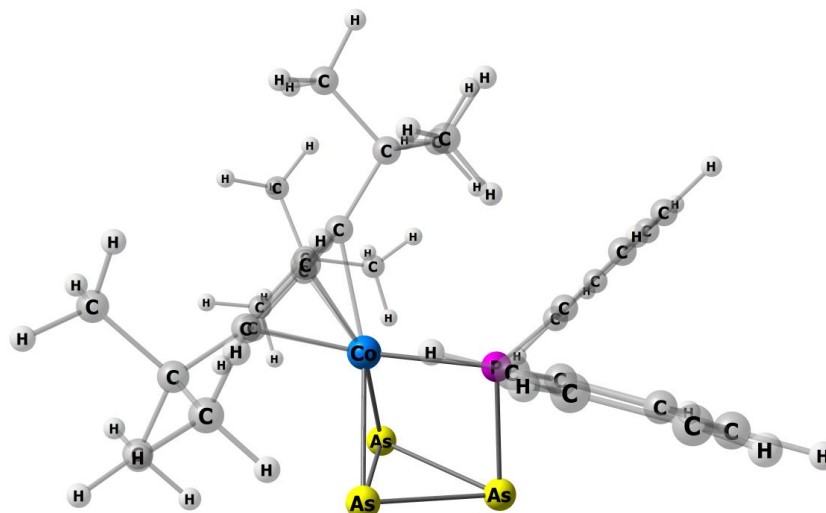

|    |              |              |              |   |              |              |              |
|----|--------------|--------------|--------------|---|--------------|--------------|--------------|
| Co | -0.764964000 | -0.153051000 | -0.076703000 | H | -2.215566000 | 1.774737000  | 3.951807000  |
| P  | 1.445122000  | -0.158670000 | -0.097415000 | C | -3.271775000 | 3.684305000  | 0.307992000  |
| As | -0.473759000 | -2.219038000 | -1.361211000 | H | -4.127204000 | 3.212233000  | 0.835079000  |
| As | 1.647751000  | -1.172507000 | -2.201402000 | H | -3.671563000 | 4.517705000  | -0.307948000 |
| As | -0.611960000 | -0.123767000 | -2.509686000 | H | -2.606567000 | 4.130190000  | 1.071608000  |
| C  | -1.356186000 | 1.208892000  | 1.441232000  | C | 3.118662000  | 3.437632000  | -1.327003000 |
| C  | -0.654357000 | 2.169291000  | 2.434319000  | H | 3.031665000  | 4.084392000  | -2.214711000 |
| C  | 3.336301000  | 1.768487000  | 0.921214000  | C | -1.555481000 | -0.174478000 | 1.858594000  |
| H  | 3.437107000  | 1.121909000  | 1.806320000  | H | -1.116312000 | -0.616250000 | 2.759423000  |
| C  | 4.067693000  | 2.968081000  | 0.859209000  | C | -3.830552000 | -2.731705000 | -0.028172000 |
| H  | 4.727327000  | 3.245676000  | 1.697150000  | H | -4.315532000 | -3.707262000 | 0.184944000  |
| C  | 3.814764000  | -1.452409000 | 0.848663000  | H | -3.092253000 | -2.892635000 | -0.841598000 |
| H  | 4.355504000  | -0.861133000 | 0.091766000  | H | -4.616826000 | -2.048534000 | -0.410764000 |
| C  | 2.386865000  | 2.240718000  | -1.267162000 | C | 4.517179000  | -2.378390000 | 1.636293000  |
| H  | 1.732620000  | 1.956858000  | -2.107258000 | H | 5.602470000  | -2.504160000 | 1.493133000  |
| C  | 2.485765000  | 1.387995000  | -0.142483000 | C | -2.472241000 | -0.837542000 | 0.990755000  |
| C  | -3.163985000 | -2.178160000 | 1.249987000  | C | -2.185310000 | -3.227076000 | 1.820437000  |
| C  | -2.802306000 | 0.123586000  | -0.026143000 | H | -1.708050000 | -2.875140000 | 2.758668000  |
| H  | -3.467744000 | -0.081196000 | -0.871017000 | H | -1.380746000 | -3.462656000 | 1.093796000  |
| C  | 0.429113000  | 1.416211000  | 3.250673000  | H | -2.724235000 | -4.168324000 | 2.057934000  |
| H  | 0.001331000  | 0.629199000  | 3.902996000  | C | -1.333929000 | 3.330069000  | -1.301388000 |
| H  | 0.957518000  | 2.131338000  | 3.914324000  | H | -0.505769000 | 3.559777000  | -0.610441000 |
| H  | 1.184546000  | 0.941067000  | 2.594941000  | H | -1.654458000 | 4.278396000  | -1.784039000 |
| C  | -4.273342000 | -1.900386000 | 2.304413000  | H | -0.930591000 | 2.664426000  | -2.091671000 |
| H  | -4.993318000 | -1.139687000 | 1.937357000  | C | -3.543563000 | 2.278819000  | -1.718958000 |
| H  | -3.840793000 | -1.526354000 | 3.255451000  | H | -3.120627000 | 1.530566000  | -2.420895000 |
| H  | -4.839514000 | -2.830452000 | 2.525492000  | H | -3.789287000 | 3.183847000  | -2.312249000 |
| C  | -2.161534000 | 1.403931000  | 0.231354000  | H | -4.495540000 | 1.879831000  | -1.312193000 |
| C  | -2.539484000 | 2.658519000  | -0.599555000 | C | 3.961278000  | 3.807392000  | -0.262694000 |
| C  | 1.745971000  | -2.066683000 | 1.974915000  | H | 4.536417000  | 4.745730000  | -0.310448000 |
| H  | 0.656528000  | -1.953314000 | 2.083065000  | C | 2.451512000  | -2.992845000 | 2.764109000  |
| C  | 2.419949000  | -1.279979000 | 1.018005000  | H | 1.912080000  | -3.599338000 | 3.509247000  |
| C  | 3.837859000  | -3.148842000 | 2.598940000  | C | 0.027945000  | 3.406360000  | 1.814273000  |
| H  | 4.390794000  | -3.876091000 | 3.214683000  | H | 0.791494000  | 3.120283000  | 1.064962000  |
| C  | -1.740237000 | 2.640033000  | 3.445398000  | H | 0.540960000  | 3.981499000  | 2.613211000  |
| H  | -2.542157000 | 3.222184000  | 2.951545000  | H | -0.692385000 | 4.094070000  | 1.334830000  |
| H  | -1.280610000 | 3.283376000  | 4.226277000  |   |              |              |              |



**Table S21:** Optimized geometry of **10b**. XYZ coordinated in angstroms. BP86/def2-SVP level of theory.

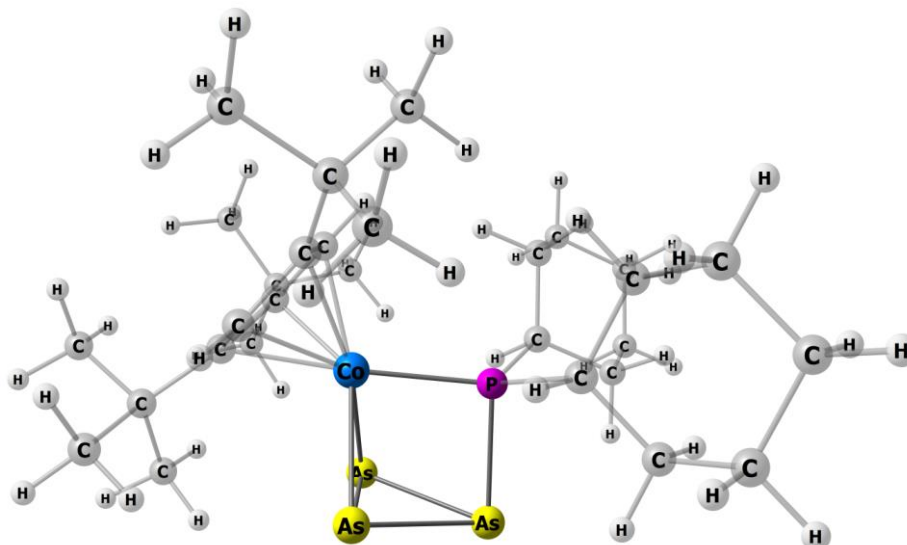

|    |              |              |              |   |              |              |              |
|----|--------------|--------------|--------------|---|--------------|--------------|--------------|
| As | -0.618304000 | -0.397928000 | -2.496224000 | C | 0.287668000  | -3.897562000 | 0.722241000  |
| As | -1.010226000 | 1.734662000  | -1.452294000 | H | 0.677436000  | -4.860899000 | 1.114575000  |
| As | 1.283306000  | 1.234348000  | -2.292258000 | H | 1.145524000  | -3.299819000 | 0.359876000  |
| Co | -0.803116000 | -0.252106000 | -0.082250000 | H | -0.351999000 | -4.124930000 | -0.155100000 |
| C  | -1.178702000 | -1.889272000 | 1.267437000  | C | 0.422371000  | -2.801061000 | 3.005971000  |
| C  | -2.098593000 | -1.858677000 | 0.179704000  | H | -0.159165000 | -2.414788000 | 3.868549000  |
| H  | -2.245318000 | -2.682167000 | -0.526532000 | H | 1.169075000  | -2.028765000 | 2.734601000  |
| C  | -1.306713000 | -0.607781000 | 1.913119000  | H | 0.970112000  | -3.703108000 | 3.350134000  |
| H  | -0.745623000 | -0.302823000 | 2.803115000  | C | 2.755716000  | -1.141972000 | -0.419364000 |
| C  | -2.872202000 | -0.629991000 | 0.180956000  | P | 1.403313000  | 0.205084000  | -0.190719000 |
| C  | -2.342777000 | 0.186267000  | 1.296985000  | C | 2.090217000  | 1.566319000  | 0.944127000  |
| C  | -0.498268000 | -3.144578000 | 1.816722000  | H | 4.245348000  | 1.449894000  | 0.596893000  |
| C  | -2.820139000 | 1.466207000  | 2.032026000  | C | 3.425353000  | 2.195938000  | 0.493500000  |
| C  | -1.606756000 | 2.240003000  | 2.609575000  | H | 3.378966000  | 2.468589000  | -0.583760000 |
| H  | -1.031827000 | 1.646680000  | 3.347868000  | C | 3.765848000  | 3.437506000  | 1.341389000  |
| H  | -1.960107000 | 3.152371000  | 3.133862000  | H | 2.139915000  | -1.992795000 | -0.791854000 |
| H  | -0.913787000 | 2.551050000  | 1.801386000  | C | 3.466337000  | -1.595061000 | 0.872905000  |
| C  | -4.158070000 | -0.535309000 | -0.690151000 | C | 3.800880000  | -0.826971000 | -1.513736000 |
| C  | -3.708047000 | 1.007832000  | 3.224454000  | H | 4.078926000  | -0.754400000 | 1.268033000  |
| H  | -4.601223000 | 0.450931000  | 2.877351000  | H | 2.730133000  | -1.846065000 | 1.663217000  |
| H  | -4.057863000 | 1.886830000  | 3.807388000  | C | 4.389278000  | -2.804301000 | 0.618755000  |
| H  | -3.143947000 | 0.343155000  | 3.910747000  | H | 1.294093000  | 2.336044000  | 0.802693000  |
| C  | -1.631276000 | -4.073072000 | 2.341482000  | C | 2.123129000  | 1.220240000  | 2.448623000  |
| H  | -2.299935000 | -4.399053000 | 1.518555000  | H | 3.294405000  | -0.534061000 | -2.458906000 |
| H  | -2.254105000 | -3.553485000 | 3.099059000  | H | 4.419240000  | 0.046143000  | -1.205792000 |
| H  | -1.201363000 | -4.981910000 | 2.815121000  | C | 4.721620000  | -2.036074000 | -1.773564000 |
| C  | -5.381580000 | -0.592146000 | 0.265981000  | C | 2.462222000  | 2.463607000  | 3.294061000  |
| H  | -5.323452000 | -1.473459000 | 0.938567000  | H | 1.636418000  | 3.205424000  | 3.197485000  |
| H  | -6.320711000 | -0.672035000 | -0.322280000 | H | 2.510139000  | 2.189238000  | 4.370533000  |
| H  | -5.463022000 | 0.311839000  | 0.899954000  | C | 3.783241000  | 3.112531000  | 2.845000000  |
| C  | -3.614571000 | 2.483351000  | 1.187585000  | H | 1.145980000  | 0.798635000  | 2.761508000  |
| H  | -3.029427000 | 2.828962000  | 0.310653000  | H | 2.885650000  | 0.434906000  | 2.642069000  |
| H  | -3.842835000 | 3.374672000  | 1.809187000  | H | 4.744230000  | 3.857869000  | 1.021772000  |
| H  | -4.581539000 | 2.083793000  | 0.830214000  | H | 3.007105000  | 4.229192000  | 1.143999000  |
| C  | -4.269277000 | -1.770383000 | -1.623862000 | H | 4.902025000  | -3.090945000 | 1.562830000  |
| H  | -3.403696000 | -1.845438000 | -2.314667000 | H | 3.767278000  | -3.680589000 | 0.324116000  |
| H  | -5.181811000 | -1.674507000 | -2.248076000 | C | 5.415598000  | -2.513484000 | -0.487693000 |
| H  | -4.353716000 | -2.721625000 | -1.059857000 | H | 4.624873000  | 2.412901000  | 3.058008000  |
| C  | -4.268822000 | 0.700971000  | -1.614037000 | H | 3.986432000  | 4.030784000  | 3.437686000  |
| H  | -4.145044000 | 1.658586000  | -1.081878000 | H | 6.118691000  | -1.723293000 | -0.135826000 |
| H  | -5.270368000 | 0.711894000  | -2.095229000 | H | 6.035489000  | -3.413824000 | -0.689919000 |
| H  | -3.508805000 | 0.665667000  | -2.419844000 | H | 4.114640000  | -2.869707000 | -2.196248000 |
|    |              |              |              | H | 5.473303000  | -1.775111000 | -2.549828000 |

**Table S22:** Optimized geometry of **10c**. XYZ coordinated in angstroms. BP86/def2-SVP level of theory.

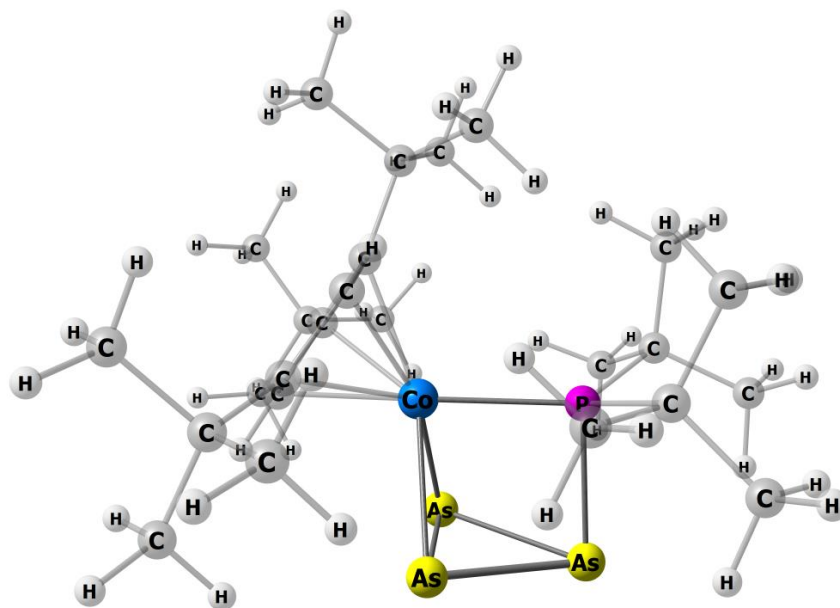

|    |              |              |              |   |              |              |              |
|----|--------------|--------------|--------------|---|--------------|--------------|--------------|
| Co | -0.408540000 | -0.217705000 | -0.023831000 | H | -2.320506000 | -0.438754000 | -3.179689000 |
| P  | 1.722670000  | 0.559528000  | 0.420885000  | H | -3.601708000 | 0.631472000  | -3.818054000 |
| As | 0.737437000  | -2.304957000 | -0.592309000 | H | -4.004642000 | -0.572071000 | -2.559308000 |
| As | 2.677827000  | -0.856661000 | -1.203551000 | C | -1.877322000 | 3.702966000  | 0.554636000  |
| As | 0.425936000  | -0.635542000 | -2.269626000 | H | -0.894964000 | 3.674934000  | 0.044921000  |
| C  | -1.952625000 | 1.089051000  | 0.763342000  | H | -1.912000000 | 4.623941000  | 1.173530000  |
| C  | -2.095115000 | 2.467530000  | 1.452239000  | H | -2.658439000 | 3.806887000  | -0.220905000 |
| C  | -2.281019000 | -2.650160000 | 1.556906000  | C | 2.416299000  | 2.319303000  | -0.138220000 |
| C  | -2.310509000 | -0.879488000 | -0.416517000 | H | 0.737015000  | 2.528996000  | -1.555366000 |
| H  | -2.547747000 | -1.579508000 | -1.224144000 | H | 2.219942000  | 1.857039000  | -2.293958000 |
| C  | -1.111488000 | 2.571146000  | 2.647899000  | H | 2.145052000  | 3.601422000  | -1.878241000 |
| H  | -1.392834000 | 1.898280000  | 3.482420000  | H | 4.337439000  | 1.470065000  | -0.845893000 |
| H  | -1.110148000 | 3.603928000  | 3.053332000  | H | 4.436786000  | 2.249028000  | 0.772529000  |
| H  | -0.079595000 | 2.315709000  | 2.340577000  | H | 4.301160000  | 3.253084000  | -0.698182000 |
| C  | -3.657158000 | -2.519725000 | 2.270711000  | C | 1.843284000  | 2.583236000  | -1.546205000 |
| H  | -4.451770000 | -2.215822000 | 1.557901000  | C | 3.955688000  | 2.307441000  | -0.223774000 |
| H  | -3.620823000 | -1.762623000 | 3.081012000  | C | 1.969201000  | 3.476889000  | 0.777192000  |
| H  | -3.953107000 | -3.491820000 | 2.720296000  | H | 2.401490000  | 3.427081000  | 1.792606000  |
| C  | -2.331599000 | 0.567396000  | -0.547961000 | H | 2.303409000  | 4.437836000  | 0.325938000  |
| C  | -2.912302000 | 1.223677000  | -1.831072000 | H | 0.869782000  | 3.529674000  | 0.875289000  |
| C  | -3.535736000 | 2.534479000  | 2.040577000  | C | 2.637084000  | 0.052041000  | 2.099960000  |
| H  | -4.308134000 | 2.501545000  | 1.247891000  | H | 1.702146000  | 1.668745000  | 3.294620000  |
| H  | -3.671482000 | 3.477219000  | 2.613184000  | H | 3.397394000  | 2.014429000  | 2.801174000  |
| H  | -3.723838000 | 1.685659000  | 2.729590000  | H | 3.063323000  | 0.823757000  | 4.086725000  |
| C  | -4.271123000 | 1.896278000  | -1.492525000 | H | 4.731411000  | 0.288473000  | 1.386037000  |
| H  | -4.954887000 | 1.179620000  | -0.991499000 | H | 4.063878000  | -1.363297000 | 1.176886000  |
| H  | -4.766452000 | 2.243121000  | -2.424443000 | H | 4.521918000  | -0.780119000 | 2.804740000  |
| H  | -4.159690000 | 2.776945000  | -0.831860000 | C | 2.696898000  | 1.214410000  | 3.111121000  |
| C  | -1.709869000 | -0.067176000 | 1.621164000  | C | 4.065014000  | -0.471284000 | 1.837539000  |
| H  | -1.445804000 | -0.001521000 | 2.683021000  | C | 1.811619000  | -1.087320000 | 2.721924000  |
| C  | -2.395275000 | -3.755890000 | 0.484647000  | H | 1.762849000  | -1.969632000 | 2.053030000  |
| H  | -2.601410000 | -4.734161000 | 0.967254000  | H | 2.287132000  | -1.407080000 | 3.675982000  |
| H  | -1.458852000 | -3.859262000 | -0.102349000 | C | -1.968093000 | 2.241332000  | -2.513753000 |
| H  | -3.223912000 | -3.555669000 | -0.225412000 | H | -1.611094000 | 3.026983000  | -1.827192000 |
| C  | -1.999169000 | -1.279084000 | 0.930730000  | H | -2.494569000 | 2.740236000  | -3.355553000 |
| C  | -1.218406000 | -3.055362000 | 2.598091000  | H | -1.078018000 | 1.726820000  | -2.929855000 |
| H  | -1.102920000 | -2.290033000 | 3.393056000  | C | -3.224381000 | 0.140162000  | -2.897384000 |
| H  | -0.230105000 | -3.203358000 | 2.120056000  | H | 0.773525000  | -0.771526000 | 2.939202000  |
| H  | -1.508649000 | -4.006363000 | 3.092731000  |   |              |              |              |

**Table S23:** Optimized geometry of **11**. XYZ coordinated in angstroms. BP86/def2-SVP level of theory.

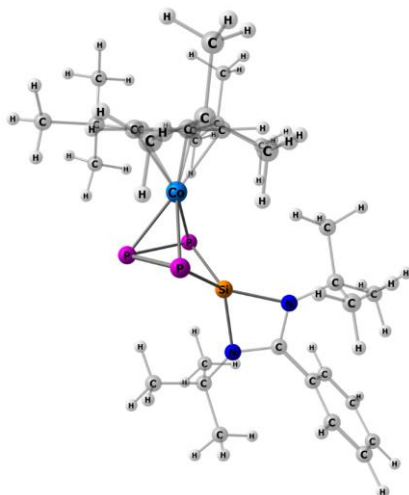

|    |              |              |              |   |              |              |              |
|----|--------------|--------------|--------------|---|--------------|--------------|--------------|
| Co | 1.826028000  | -0.133924000 | -0.377069000 | C | 1.620031000  | 3.558258000  | -1.463816000 |
| P  | 0.154536000  | 0.138916000  | -2.041453000 | H | 0.715920000  | 2.948215000  | -1.665068000 |
| P  | 0.334147000  | -1.601998000 | 0.707957000  | H | 1.586895000  | 4.456385000  | -2.116589000 |
| Si | -1.175681000 | -0.415830000 | -0.375133000 | H | 1.572261000  | 3.910074000  | -0.412485000 |
| P  | 0.989036000  | -1.876123000 | -1.449274000 | C | -7.658487000 | 0.620182000  | 0.841643000  |
| N  | -2.948852000 | -1.102262000 | -0.631860000 | H | -8.726215000 | 0.791416000  | 1.050636000  |
| N  | -2.452165000 | 0.754237000  | 0.407364000  | C | 3.088902000  | 0.099275000  | 2.718373000  |
| C  | -4.932890000 | -2.384857000 | -1.508772000 | C | 5.869371000  | -1.670340000 | 1.000108000  |
| H  | -5.673675000 | -2.066988000 | -0.750759000 | H | 6.458889000  | -0.772368000 | 0.718959000  |
| H  | -5.225152000 | -3.396319000 | -1.858444000 | H | 6.533613000  | -2.556265000 | 0.907205000  |
| H  | -4.996718000 | -1.695615000 | -2.375555000 | H | 5.596579000  | -1.572102000 | 2.068174000  |
| C  | -4.924247000 | 0.182542000  | 0.306707000  | C | 4.336832000  | 0.835050000  | 3.285079000  |
| C  | -3.494728000 | -2.447231000 | -0.951673000 | H | 5.281119000  | 0.369348000  | 2.939760000  |
| C  | -3.473793000 | -0.052603000 | 0.026705000  | H | 4.329527000  | 0.809874000  | 4.396301000  |
| C  | -2.442657000 | 2.195080000  | 0.775185000  | H | 4.350752000  | 1.897640000  | 2.965245000  |
| C  | -5.476709000 | -0.203826000 | 1.547709000  | C | 1.826984000  | 0.799035000  | 3.286878000  |
| H  | -4.832988000 | -0.669841000 | 2.309945000  | H | 1.818248000  | 1.890337000  | 3.093999000  |
| C  | -5.750626000 | 0.788524000  | -0.664817000 | H | 1.789005000  | 0.664077000  | 4.388138000  |
| H  | -5.325001000 | 1.082197000  | -1.636927000 | H | 0.908229000  | 0.359953000  | 2.847786000  |
| C  | 3.687052000  | 0.298843000  | -1.097883000 | C | 3.059245000  | -1.342118000 | 3.270401000  |
| H  | 4.061866000  | 0.018864000  | -2.087024000 | H | 2.178357000  | -1.899933000 | 2.890950000  |
| C  | -3.449660000 | -3.324661000 | 0.321775000  | H | 2.985531000  | -1.305670000 | 4.378069000  |
| H  | -2.416977000 | -3.376949000 | 0.724105000  | H | 3.971372000  | -1.916899000 | 3.026970000  |
| H  | -3.787247000 | -4.356794000 | 0.092004000  | C | 4.138930000  | 3.634878000  | -1.444005000 |
| H  | -4.114872000 | -2.916970000 | 1.111181000  | H | 4.143922000  | 3.983354000  | -0.390146000 |
| C  | 3.800869000  | -0.518048000 | 0.094729000  | H | 4.140074000  | 4.529780000  | -2.103255000 |
| C  | 2.900820000  | 2.741557000  | -1.736123000 | H | 5.082557000  | 3.077632000  | -1.619276000 |
| C  | -6.839590000 | 0.012005000  | 1.809847000  | C | 2.929376000  | 2.317241000  | -3.221005000 |
| H  | -7.263726000 | -0.294353000 | 2.779045000  | H | 3.882742000  | 1.815401000  | -3.486860000 |
| C  | -2.571778000 | -3.047913000 | -2.032821000 | H | 2.832370000  | 3.208452000  | -3.876605000 |
| H  | -2.570258000 | -2.418515000 | -2.945920000 | H | 2.095647000  | 1.623508000  | -3.454848000 |
| H  | -2.921356000 | -4.064068000 | -2.306284000 | C | 5.175172000  | -2.098205000 | -1.347150000 |
| H  | -1.525074000 | -3.128290000 | -1.674296000 | H | 4.353996000  | -2.200749000 | -2.085652000 |
| C  | 3.007047000  | 1.531029000  | -0.806319000 | H | 5.746875000  | -3.049779000 | -1.348575000 |
| C  | 3.139075000  | 0.246597000  | 1.175576000  | H | -3.434041000 | 1.864598000  | 2.711215000  |
| C  | 2.676713000  | 1.492657000  | 0.589773000  | C | -7.111122000 | 1.009144000  | -0.393964000 |
| H  | 2.191211000  | 2.302919000  | 1.144414000  | H | -7.748531000 | 1.485086000  | -1.155695000 |
| C  | -1.049476000 | 2.479255000  | 1.368344000  | C | 3.816233000  | -3.086975000 | 0.470794000  |
| H  | -0.898716000 | 1.911314000  | 2.308193000  | H | 3.283384000  | -2.981964000 | 1.430656000  |
| H  | -0.945462000 | 3.559941000  | 1.593642000  | H | 4.491090000  | -3.966981000 | 0.548091000  |
| H  | -0.244545000 | 2.189008000  | 0.662562000  | H | 3.057495000  | -3.309819000 | -0.308272000 |
| C  | 4.629214000  | -1.828485000 | 0.079370000  | C | -2.656456000 | 3.047691000  | -0.497778000 |
| C  | -3.509628000 | 2.541899000  | 1.836251000  | H | -1.889523000 | 2.811293000  | -1.263756000 |
| H  | -4.541595000 | 2.491663000  | 1.440522000  | H | -2.584972000 | 4.129061000  | -0.258238000 |
| H  | -3.338326000 | 3.578637000  | 2.192603000  | H | -3.658367000 | 2.863668000  | -0.937482000 |
|    |              |              |              | H | 5.861840000  | -1.297542000 | -1.691339000 |

**Table S24:** Optimized geometry of **12**. XYZ coordinated in angstroms. BP86/def2-SVP level of theory.

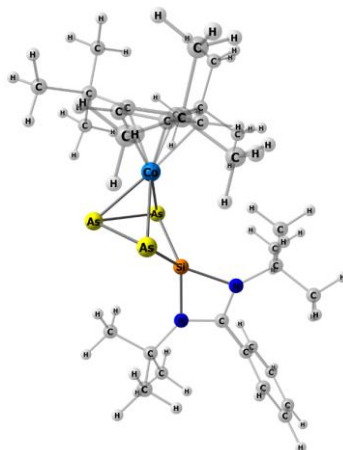

|    |              |              |              |   |              |              |              |
|----|--------------|--------------|--------------|---|--------------|--------------|--------------|
| As | -0.266905000 | 0.629750000  | 1.642350000  | H | 7.830977000  | -1.074653000 | -1.817828000 |
| As | -0.068351000 | 0.894715000  | -1.801434000 | C | 5.867582000  | -0.637106000 | -0.998431000 |
| As | -1.011127000 | 2.327425000  | -0.010647000 | H | 5.408452000  | -0.470117000 | -1.985209000 |
| Co | -1.805378000 | 0.139937000  | -0.218306000 | C | -5.870596000 | 0.374048000  | 1.821119000  |
| Si | 1.336100000  | 0.411181000  | -0.023515000 | H | -6.547179000 | 1.099608000  | 2.321663000  |
| C  | -3.678425000 | 0.252560000  | -1.028597000 | H | -5.600085000 | -0.395808000 | 2.568811000  |
| H  | -4.074668000 | 1.096331000  | -1.602137000 | H | -6.444642000 | -0.125907000 | 1.013031000  |
| N  | 2.602841000  | -1.010926000 | -0.060907000 | C | -1.685701000 | -2.048779000 | -3.453152000 |
| N  | 3.121070000  | 1.097461000  | 0.136653000  | H | -0.758221000 | -1.459880000 | -3.297937000 |
| C  | -2.646672000 | -1.734782000 | -0.513585000 | H | -1.721979000 | -2.359123000 | -4.519219000 |
| H  | -2.156903000 | -2.709221000 | -0.618600000 | H | -1.614694000 | -2.971624000 | -2.841115000 |
| C  | -3.780270000 | 0.108887000  | 0.412610000  | C | -3.056927000 | -1.335049000 | 3.366843000  |
| C  | -3.001117000 | -0.874472000 | -1.606549000 | H | -2.183729000 | -0.656273000 | 3.454709000  |
| C  | 3.749526000  | 2.434971000  | -0.004285000 | H | -2.983874000 | -2.084965000 | 4.182912000  |
| C  | 5.083073000  | -0.515070000 | 0.169364000  | H | -3.977336000 | -0.750461000 | 3.547907000  |
| C  | -2.939884000 | -1.220962000 | -3.097040000 | C | -2.982748000 | 0.048206000  | -3.975990000 |
| C  | 3.634715000  | -0.147887000 | 0.079128000  | H | -3.919676000 | 0.622214000  | -3.821829000 |
| C  | 5.675183000  | -0.742633000 | 1.431318000  | H | -2.936745000 | -0.227219000 | -5.050832000 |
| H  | 5.068977000  | -0.638037000 | 2.344513000  | H | -2.126360000 | 0.718977000  | -3.756245000 |
| C  | -3.108656000 | -1.168146000 | 0.741235000  | C | -4.304029000 | -3.001767000 | 1.943188000  |
| C  | 2.509161000  | -2.481464000 | 0.107730000  | H | -5.252974000 | -2.430363000 | 1.972219000  |
| C  | 3.682459000  | -3.232563000 | -0.557809000 | H | -4.301556000 | -3.705610000 | 2.803383000  |
| H  | 4.646966000  | -3.067215000 | -0.041271000 | H | -4.302943000 | -3.600633000 | 1.009070000  |
| H  | 3.795412000  | -2.932934000 | -1.619761000 | C | -1.795443000 | -2.955007000 | 1.995302000  |
| H  | 3.471531000  | -4.321566000 | -0.532495000 | H | -1.765251000 | -3.649495000 | 1.132566000  |
| C  | -4.627642000 | 1.105405000  | 1.246040000  | H | -1.765732000 | -3.576658000 | 2.914616000  |
| C  | 7.811124000  | -1.209514000 | 0.356167000  | H | -0.881385000 | -2.327592000 | 1.967795000  |
| H  | 8.875999000  | -1.481168000 | 0.428649000  | C | -4.202288000 | -2.078778000 | -3.396584000 |
| C  | 2.447893000  | -2.816829000 | 1.616862000  | H | -4.198316000 | -3.019302000 | -2.807158000 |
| H  | 2.287071000  | -3.904353000 | 1.769347000  | H | -4.244952000 | -2.347510000 | -4.474234000 |
| H  | 1.615694000  | -2.270306000 | 2.105754000  | H | -5.130186000 | -1.525525000 | -3.142338000 |
| H  | 3.393590000  | -2.537209000 | 2.125218000  | C | 4.078310000  | 2.689493000  | -1.494587000 |
| C  | 7.033064000  | -1.090048000 | 1.521625000  | H | 4.843278000  | 1.974965000  | -1.862305000 |
| H  | 7.486631000  | -1.265622000 | 2.509811000  | H | 4.477604000  | 3.715722000  | -1.634203000 |
| C  | 1.197406000  | -2.907707000 | -0.583157000 | H | 3.167901000  | 2.583327000  | -2.119341000 |
| H  | 1.250292000  | -2.720861000 | -1.675077000 | C | 5.022825000  | 2.577373000  | 0.857978000  |
| H  | 0.329492000  | -2.341130000 | -0.187189000 | H | 4.816985000  | 2.317665000  | 1.916581000  |
| H  | 1.015261000  | -3.989653000 | -0.421836000 | H | 5.364320000  | 3.632640000  | 0.827248000  |
| C  | -3.063970000 | -2.063993000 | 2.006897000  | H | 5.856810000  | 1.946433000  | 0.496044000  |
| C  | -5.167488000 | 2.239564000  | 0.336018000  | C | 2.707515000  | 3.464729000  | 0.479757000  |
| H  | -5.747369000 | 2.959828000  | 0.950216000  | H | 1.772016000  | 3.403868000  | -0.113488000 |
| H  | -5.844719000 | 1.856916000  | -0.455038000 | H | 3.115248000  | 4.490937000  | 0.378585000  |
| H  | -4.341659000 | 2.800819000  | -0.147715000 | H | -4.531457000 | 2.440570000  | 2.981827000  |
| C  | -3.842976000 | 1.807871000  | 2.380846000  | C | 7.226197000  | -0.981216000 | -0.902091000 |
| H  | -3.060458000 | 2.470094000  | 1.955328000  | H | 2.444636000  | 3.293474000  | 1.543371000  |
| H  | -3.344222000 | 1.104663000  | 3.068540000  |   |              |              |              |

## 4.2 Model system $[\text{Cp}^{\text{H}}\text{CoP}_3]^- + \text{PMe}_2^+$

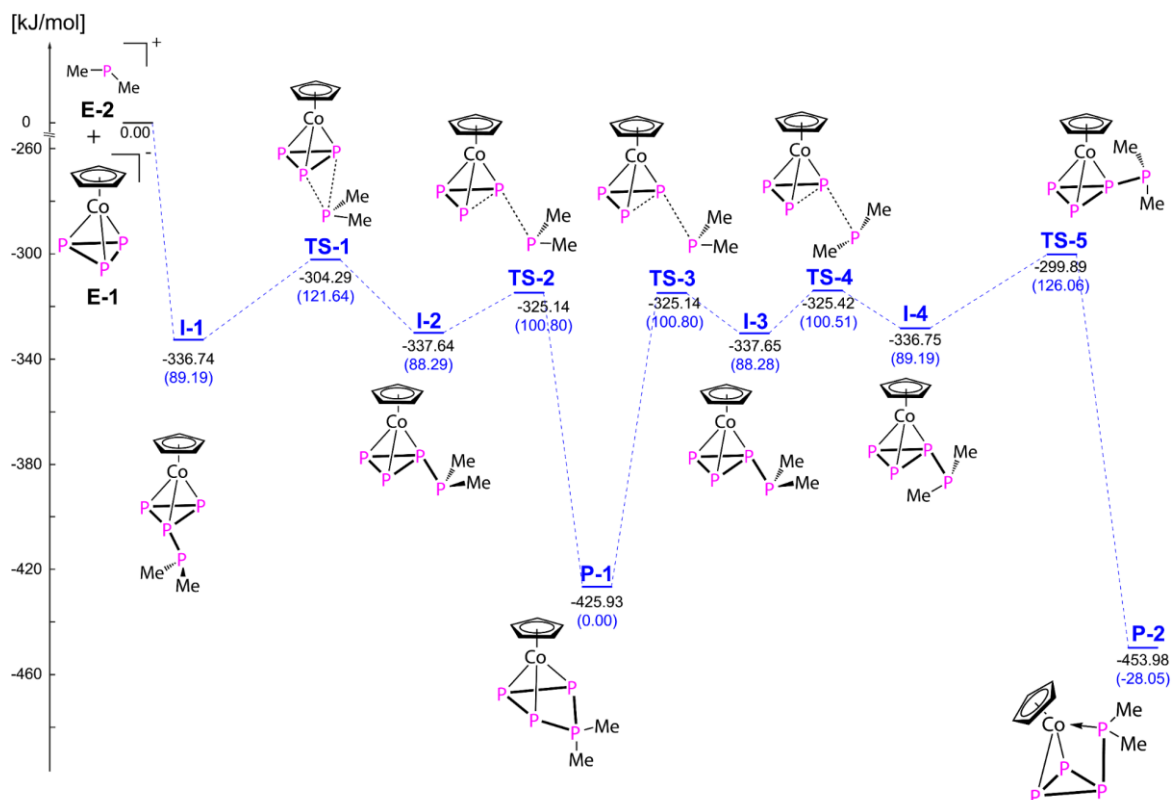

**Figure S73.** Pathway of the reaction of  $[\text{Cp}^{\text{H}}\text{CoP}_3]^-$  with  $\text{PMe}_2^+$ . Optimization conducted at the BP86/def2-SVP level of theory. Energy values obtained from single point calculation at the B3LYP/def2-SVP level of theory including solvent effects and dispersion correction (GD3BJ).

**Table S25:** Total energies for optimized geometries, optimization at the BP86/def2-SVP level and single point energies at the B3LYP/def2-TZVP level of theory including solvent effects and dispersion correction GD3BJ.

|                                                   | BP86/def2-SVP<br>total energy [Ha] | B3LYP/def2-TZVP<br>total energy [Ha] |
|---------------------------------------------------|------------------------------------|--------------------------------------|
| <b>E-1</b> $\text{PMe}_2^+$                       | -420.715050551                     | -421.005180115                       |
| <b>E-2</b> $[\text{Cp}^{\text{H}}\text{CoP}_3]^-$ | -2600.23091948                     | -2600.79338366                       |
| <b>I-1</b>                                        | -3021.21140299                     | -3021.92682249                       |
| <b>I-2</b>                                        | -3021.21191669                     | -3021.92716445                       |
| <b>I-3</b>                                        | -3021.21191696                     | -3021.92716657                       |
| <b>I-4</b>                                        | -3021.21140289                     | -3021.92682580                       |
| <b>TS-1</b>                                       | -3021.20283745                     | -3021.91446067                       |
| <b>TS-2</b>                                       | -3021.21036332                     | -3021.92240128                       |
| <b>TS-3</b>                                       | -3021.21036332                     | -3021.92240128                       |
| <b>TS-4</b>                                       | -3021.20976802                     | -3021.92250837                       |
| <b>TS-5</b>                                       | -3021.19664403                     | -3021.91277719                       |
| <b>P-1</b>                                        | -3021.23818703                     | -3021.96079231                       |
| <b>P-2</b>                                        | -3021.25000834                     | -3021.97147658                       |

**Table S26:** Optimized geometry of E-1. XYZ coordinated in angstroms. BP86/def2-SVP level of theory.

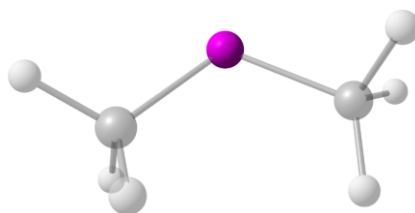

|   |             |              |              |   |             |             |              |
|---|-------------|--------------|--------------|---|-------------|-------------|--------------|
| P | 1.618447000 | -0.014501000 | 0.484690000  | C | 2.656163000 | 1.080504000 | -0.484410000 |
| C | 2.639334000 | -1.463838000 | 0.753196000  | H | 3.042674000 | 1.767027000 | 0.330530000  |
| H | 2.375612000 | -1.985642000 | 1.699019000  | H | 3.539469000 | 0.642516000 | -0.992861000 |
| H | 2.237274000 | -2.147228000 | -0.056873000 | H | 2.054242000 | 1.750885000 | -1.136111000 |
| H | 3.732183000 | -1.366078000 | 0.589760000  |   |             |             |              |

**Table S27:** Optimized geometry of E-2. XYZ coordinated in angstroms. BP86/def2-SVP level of theory.

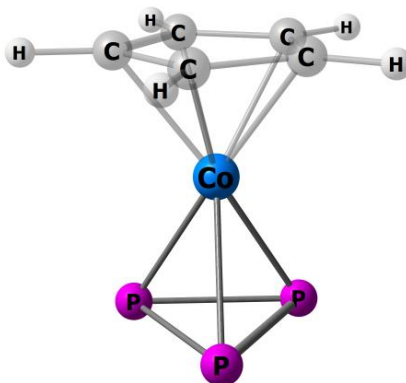

|    |              |              |              |   |              |              |              |
|----|--------------|--------------|--------------|---|--------------|--------------|--------------|
| Co | -1.638534000 | -0.698380000 | -0.995253000 | C | -2.308685000 | 1.162720000  | -0.471721000 |
| P  | -0.778352000 | -2.709100000 | -1.669924000 | C | -1.841529000 | -0.580310000 | 1.027145000  |
| P  | 0.247160000  | -0.859952000 | -2.288733000 | H | -1.341470000 | -1.199557000 | 1.785233000  |
| P  | -1.696120000 | -1.393365000 | -3.180317000 | C | -3.117383000 | -0.861526000 | 0.400201000  |
| C  | -1.342185000 | 0.658708000  | 0.480417000  | H | -3.760992000 | -1.730332000 | 0.597811000  |
| C  | -3.390672000 | 0.204841000  | -0.534328000 | H | -0.393074000 | 1.143130000  | 0.751178000  |
| H  | -4.281116000 | 0.283344000  | -1.174535000 | H | -2.229683000 | 2.094160000  | -1.049546000 |

**Table S28:** Optimized geometry of I-1. XYZ coordinated in angstroms. BP86/def2-SVP level of theory.

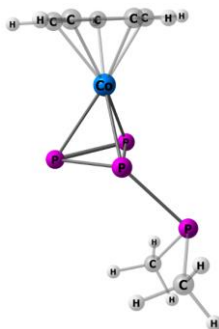

|    |              |              |              |   |             |              |              |
|----|--------------|--------------|--------------|---|-------------|--------------|--------------|
| Co | 1.716230000  | 0.042743000  | 0.016911000  | H | 3.608357000 | 1.583328000  | 1.405895000  |
| P  | 1.395801000  | -1.357577000 | 1.743021000  | C | 1.108255000 | -4.625049000 | 1.827779000  |
| P  | 2.350503000  | -3.359419000 | 2.422636000  | H | 1.237034000 | -5.542597000 | 2.441009000  |
| P  | 1.635389000  | -2.075544000 | -0.475424000 | H | 0.058288000 | -4.275323000 | 1.921307000  |
| P  | -0.249416000 | -1.302124000 | 0.290239000  | H | 1.310576000 | -4.874936000 | 0.767534000  |
| C  | 2.171089000  | 1.151591000  | -1.626515000 | C | 1.770540000 | -3.217199000 | 4.204326000  |
| H  | 2.099994000  | 0.828966000  | -2.673453000 | H | 2.274082000 | -2.354679000 | 4.686614000  |
| C  | 2.959901000  | 1.561433000  | 0.519710000  | H | 0.671508000 | -3.099637000 | 4.306800000  |
| C  | 3.322131000  | 1.023332000  | -0.770674000 | H | 0.102225000 | 1.992889000  | -1.229903000 |
| C  | 1.114000000  | 1.778510000  | -0.861278000 | H | 4.293411000 | 0.591810000  | -1.043572000 |
| C  | 1.607694000  | 2.060386000  | 0.457780000  | H | 2.085929000 | -4.137965000 | 4.741337000  |
| H  | 1.050954000  | 2.534264000  | 1.275703000  |   |             |              |              |

**Table S29:** Optimized geometry of I-2. XYZ coordinated in angstroms. BP86/def2-SVP level of theory.

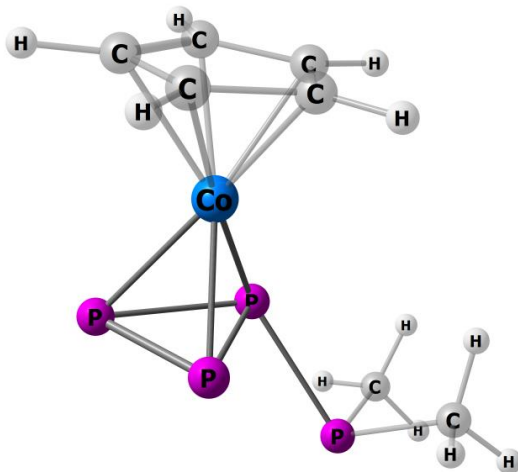

|    |              |              |              |   |              |              |              |
|----|--------------|--------------|--------------|---|--------------|--------------|--------------|
| Co | -1.169277000 | -0.012963000 | -0.112270000 | H | -3.236323000 | -0.603562000 | -1.954974000 |
| P  | 0.902528000  | 0.527074000  | 0.588708000  | H | -2.632267000 | 0.325439000  | 2.330754000  |
| P  | 3.030653000  | -0.019664000 | -0.167264000 | H | -1.423079000 | -2.062977000 | 1.795172000  |
| P  | -0.171253000 | 2.134397000  | -0.443484000 | C | 3.752068000  | -0.235639000 | 1.555074000  |
| P  | 0.267244000  | 0.424977000  | -1.691461000 | H | 4.786963000  | -0.626137000 | 1.445629000  |
| C  | -3.168771000 | 0.298198000  | 0.127971000  | H | 3.813013000  | 0.753844000  | 2.052046000  |
| H  | -3.690527000 | 1.253996000  | -0.012329000 | H | 3.174020000  | -0.930591000 | 2.199956000  |
| C  | -1.975580000 | -1.448014000 | 1.072068000  | C | 2.784785000  | -1.829670000 | -0.586771000 |
| C  | -2.610132000 | -0.184893000 | 1.359895000  | H | 2.113047000  | -2.355595000 | 0.123842000  |
| C  | -2.920234000 | -0.683517000 | -0.906591000 | H | 2.365971000  | -1.917038000 | -1.609128000 |
| C  | -2.187261000 | -1.774165000 | -0.319353000 | H | 3.778551000  | -2.326449000 | -0.568755000 |
| H  | -1.848590000 | -2.683211000 | -0.832101000 |   |              |              |              |



**Table S30:** Optimized geometry of I-3. XYZ coordinated in angstroms. BP86/def2-SVP level of theory.

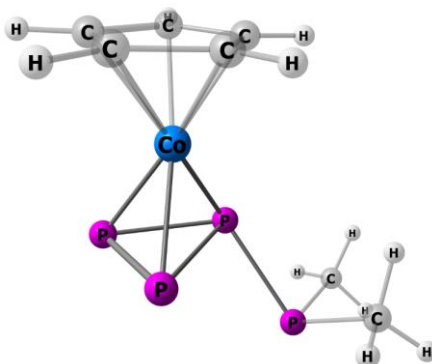

|    |              |              |              |   |              |              |              |
|----|--------------|--------------|--------------|---|--------------|--------------|--------------|
| Co | -1.156375000 | -0.037481000 | 0.029906000  | H | -2.417632000 | 0.173133000  | -2.537199000 |
| P  | 3.027268000  | -0.015458000 | 0.402875000  | C | 3.865625000  | 0.573429000  | -1.173178000 |
| P  | 0.171036000  | -0.797589000 | 1.582270000  | H | 4.880585000  | 0.938427000  | -0.904670000 |
| P  | 0.972355000  | -0.400564000 | -0.611437000 | H | 3.985152000  | -0.284502000 | -1.865590000 |
| P  | -0.137051000 | -2.199703000 | -0.033679000 | H | 3.319401000  | 1.387351000  | -1.694860000 |
| C  | -1.905384000 | 1.621593000  | -0.863606000 | C | 2.709849000  | 1.659046000  | 1.182543000  |
| C  | -3.123302000 | -0.301430000 | -0.435540000 | H | 3.690572000  | 2.154983000  | 1.346619000  |
| H  | -3.629971000 | -1.267988000 | -0.555963000 | H | 2.078904000  | 2.321477000  | 0.553351000  |
| C  | -2.483551000 | 0.451140000  | -1.478017000 | H | -3.373687000 | 0.105756000  | 1.784313000  |
| C  | -2.231678000 | 1.623527000  | 0.543514000  | H | -1.314468000 | 2.387834000  | -1.383214000 |
| H  | -1.957107000 | 2.395889000  | 1.272926000  | H | 2.216770000  | 1.520091000  | 2.165297000  |
| C  | -2.979928000 | 0.422857000  | 0.809725000  |   |              |              |              |

**Table S31:** Optimized geometry of I-4. XYZ coordinated in angstroms. BP86/def2-SVP level of theory.

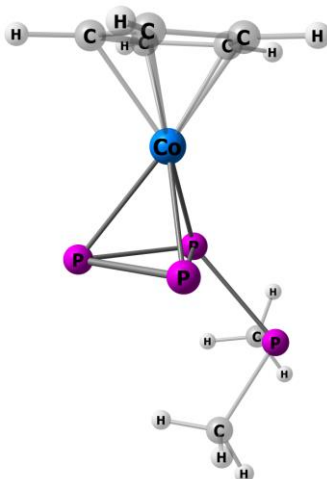

|    |              |              |              |   |              |              |              |
|----|--------------|--------------|--------------|---|--------------|--------------|--------------|
| Co | -1.418408000 | -0.796567000 | -0.991375000 | C | -2.377460000 | -0.916875000 | 0.798559000  |
| P  | 1.520242000  | -2.198655000 | -3.667452000 | H | -2.937023000 | -1.779207000 | 1.183911000  |
| P  | -1.100649000 | -2.776902000 | -1.835787000 | H | 0.327012000  | 1.034276000  | 0.227078000  |
| P  | -0.219316000 | -0.876712000 | -2.888327000 | H | -1.969305000 | 2.017385000  | -0.878472000 |
| P  | -2.316274000 | -1.490847000 | -3.102939000 | C | 0.638247000  | -3.420281000 | -4.775860000 |
| C  | -0.667744000 | 0.574202000  | 0.298468000  | H | 1.378427000  | -3.814346000 | -5.504812000 |
| C  | -2.924733000 | 0.155481000  | -0.005471000 | H | 0.254111000  | -4.263470000 | -4.168431000 |
| H  | -3.966485000 | 0.229276000  | -0.344349000 | H | -0.206822000 | -2.963937000 | -5.333620000 |
| C  | -1.876695000 | 1.094997000  | -0.291840000 | C | 2.072573000  | -0.977336000 | -4.984368000 |
| C  | -0.975413000 | -0.653138000 | 0.994727000  | H | 2.910003000  | -1.439978000 | -5.550353000 |
| H  | -0.268197000 | -1.271340000 | 1.561942000  | H | 1.268765000  | -0.696705000 | -5.696641000 |
|    |              |              |              | H | 2.460197000  | -0.060431000 | -4.495357000 |

**Table S32:** Optimized geometry of **TS-1**. XYZ coordinated in angstroms. BP86/def2-SVP level of theory.

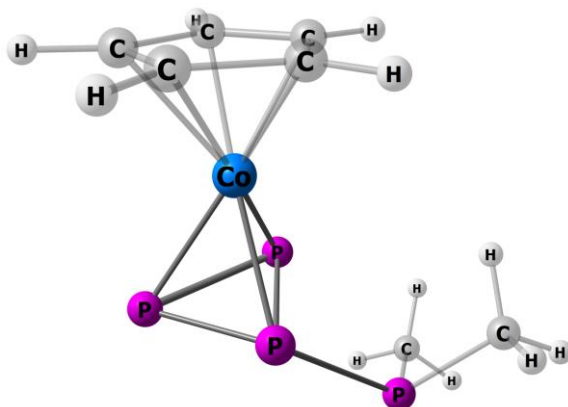

|    |              |              |              |   |             |              |              |
|----|--------------|--------------|--------------|---|-------------|--------------|--------------|
| Co | 1.421073000  | 0.105408000  | -0.002976000 | H | 1.761217000 | 2.267193000  | 1.784797000  |
| P  | 1.603469000  | -2.026113000 | 0.424275000  | H | 0.212815000 | 2.653195000  | -0.438415000 |
| P  | 0.245413000  | -2.589382000 | 2.879194000  | H | 3.759689000 | 0.295542000  | -1.633003000 |
| P  | -0.083503000 | -1.517904000 | -0.851604000 | H | 3.958841000 | 0.820134000  | 1.046424000  |
| P  | -0.232389000 | -0.746825000 | 1.179325000  | C | 1.502523000 | -3.995692000 | 2.869896000  |
| C  | 1.812694000  | 1.448160000  | -1.501720000 | H | 1.384742000 | -4.518087000 | 3.846451000  |
| H  | 1.432613000  | 1.395667000  | -2.530347000 | H | 1.251061000 | -4.713523000 | 2.064169000  |
| C  | 3.138924000  | 1.130870000  | 0.385961000  | H | 2.555594000 | -3.668188000 | 2.752748000  |
| C  | 3.038476000  | 0.859228000  | -1.027357000 | C | 1.158220000 | -1.404406000 | 4.000102000  |
| C  | 1.162355000  | 2.104584000  | -0.397070000 | H | 2.113810000 | -1.049593000 | 3.557986000  |
| C  | 1.979673000  | 1.897155000  | 0.774493000  | H | 0.518812000 | -0.524389000 | 4.215484000  |
|    |              |              |              | H | 1.380709000 | -1.919847000 | 4.958886000  |

**Table S33:** Optimized geometry of **TS-2**. XYZ coordinated in angstroms. BP86/def2-SVP level of theory.

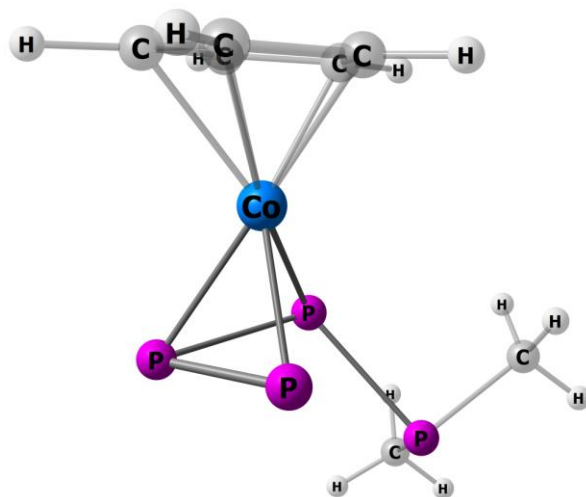

|    |              |              |              |   |              |              |              |
|----|--------------|--------------|--------------|---|--------------|--------------|--------------|
| Co | -1.145561000 | -0.081904000 | 0.036411000  | H | -3.368610000 | -0.413335000 | 1.780064000  |
| P  | 2.774964000  | 0.269412000  | 0.538717000  | H | -1.444735000 | 2.590907000  | -0.816161000 |
| P  | 0.222997000  | -1.018427000 | 1.353250000  | H | -2.454377000 | 0.627655000  | -2.420817000 |
| P  | 0.926049000  | -0.004100000 | -0.886775000 | C | 4.024700000  | 0.160540000  | -0.856651000 |
| P  | 0.083197000  | -2.014838000 | -0.563757000 | H | 5.008548000  | 0.516800000  | -0.483103000 |
| C  | -1.989292000 | 1.700740000  | -0.474615000 | H | 4.136309000  | -0.900469000 | -1.159042000 |
| C  | -3.116996000 | -0.322056000 | -0.474818000 | H | 3.727194000  | 0.759175000  | -1.745168000 |
| H  | -3.583400000 | -1.260082000 | -0.803235000 | C | 2.596406000  | 2.128807000  | 0.678321000  |
| C  | -2.526043000 | 0.669149000  | -1.326930000 | H | 3.534355000  | 2.547060000  | 1.101483000  |
| C  | -2.303943000 | 1.381916000  | 0.899251000  | H | 2.390976000  | 2.621572000  | -0.296586000 |
| H  | -2.057618000 | 1.989010000  | 1.779562000  | H | 1.769238000  | 2.360427000  | 1.379319000  |
| C  | -2.996975000 | 0.123861000  | 0.897670000  |   |              |              |              |

**Table S34:** Optimized geometry of **TS-3**. XYZ coordinated in angstroms. BP86/def2-SVP level of theory.

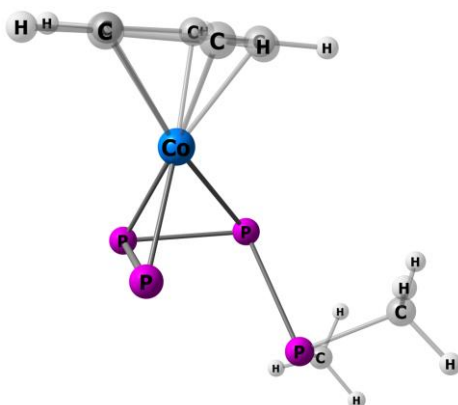

|    |              |              |              |   |              |              |              |
|----|--------------|--------------|--------------|---|--------------|--------------|--------------|
| Co | -1.145561000 | -0.081904000 | 0.036411000  | C | -2.996975000 | 0.123861000  | 0.897670000  |
| P  | 2.774964000  | 0.269412000  | 0.538717000  | H | -3.368610000 | -0.413335000 | 1.780064000  |
| P  | 0.222997000  | -1.018427000 | 1.353250000  | H | -1.444735000 | 2.590907000  | -0.816161000 |
| P  | 0.926049000  | -0.004100000 | -0.886775000 | H | -2.454377000 | 0.627655000  | -2.420817000 |
| P  | 0.083197000  | -2.014838000 | -0.563757000 | C | 4.024700000  | 0.160540000  | -0.856651000 |
| C  | -1.989292000 | 1.700740000  | -0.474615000 | H | 5.008548000  | 0.516800000  | -0.483103000 |
| C  | -3.116996000 | -0.322056000 | -0.474818000 | H | 4.136309000  | -0.900469000 | -1.159042000 |
| H  | -3.583400000 | -1.260082000 | -0.803235000 | H | 3.727194000  | 0.759175000  | -1.745168000 |
| C  | -2.526043000 | 0.669149000  | -1.326930000 | C | 2.596406000  | 2.128807000  | 0.678321000  |
| C  | -2.303943000 | 1.381916000  | 0.899251000  | H | 3.534355000  | 2.547060000  | 1.101483000  |
| H  | -2.057618000 | 1.989010000  | 1.779562000  | H | 2.390976000  | 2.621572000  | -0.296586000 |
|    |              |              |              | H | 1.769238000  | 2.360427000  | 1.379319000  |

**Table S35:** Optimized geometry of **TS-4**. XYZ coordinated in angstroms. BP86/def2-SVP level of theory.

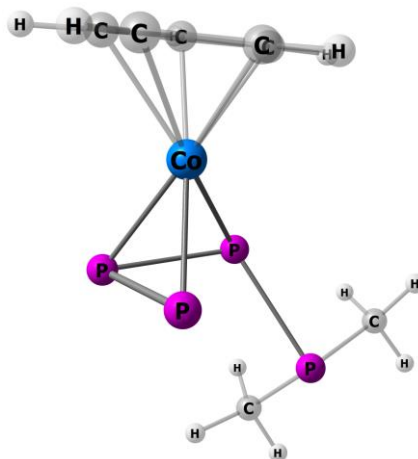

|    |              |              |              |   |              |              |              |
|----|--------------|--------------|--------------|---|--------------|--------------|--------------|
| Co | -1.086649000 | 0.239853000  | 0.130536000  | C | -3.029077000 | -0.094537000 | 0.693024000  |
| P  | 2.883600000  | -0.286131000 | 0.927855000  | H | -3.512365000 | -1.070964000 | 0.828352000  |
| P  | 0.143056000  | -1.477544000 | 0.409496000  | H | -1.254996000 | 2.647558000  | 1.576260000  |
| P  | 1.088526000  | 0.708664000  | -0.270978000 | H | -2.062978000 | 2.672265000  | -1.032635000 |
| P  | 0.161615000  | -0.753481000 | -1.631743000 | C | 3.927041000  | -0.597818000 | -0.595458000 |
| C  | -1.845276000 | 1.865943000  | 1.079863000  | H | 4.956370000  | -0.851916000 | -0.262629000 |
| C  | -2.975197000 | 0.656960000  | -0.541935000 | H | 3.518130000  | -1.471203000 | -1.142771000 |
| H  | -3.398925000 | 0.337112000  | -1.502959000 | H | 3.971066000  | 0.271624000  | -1.285161000 |
| C  | -2.271680000 | 1.884635000  | -0.298065000 | C | 3.572033000  | 1.381864000  | 1.448495000  |
| C  | -2.332440000 | 0.656499000  | 1.702231000  | H | 4.599306000  | 1.228846000  | 1.843523000  |
| H  | -2.193347000 | 0.365709000  | 2.751205000  | H | 3.604691000  | 2.117725000  | 0.615913000  |
|    |              |              |              | H | 2.951370000  | 1.793491000  | 2.270465000  |

**Table S36:** Optimized geometry of **TS-5**. XYZ coordinated in angstroms. BP86/def2-SVP level of theory.

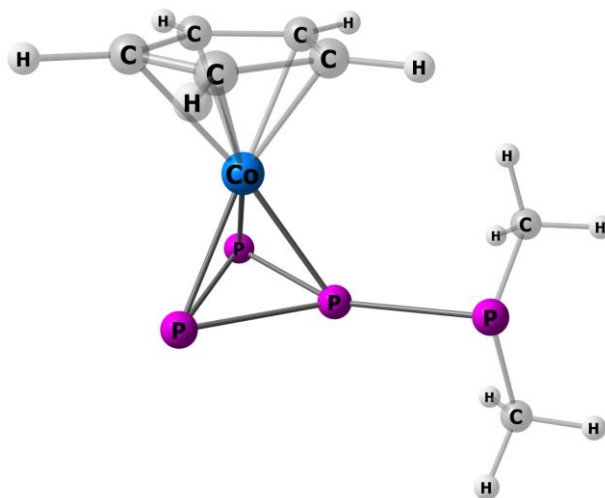

|    |              |              |              |   |              |              |              |
|----|--------------|--------------|--------------|---|--------------|--------------|--------------|
| Co | -1.490821000 | -0.648751000 | -0.580141000 | C | -3.420816000 | -0.464346000 | 0.044773000  |
| P  | 2.095229000  | -0.641425000 | 0.810765000  | H | -4.230306000 | -1.185596000 | -0.126321000 |
| P  | -0.968935000 | -2.789148000 | -0.990314000 | H | -0.831978000 | 0.949978000  | 1.699767000  |
| P  | 0.641971000  | -1.355588000 | -0.755551000 | H | -1.460717000 | 2.227600000  | -0.641997000 |
| P  | -0.603242000 | -1.159348000 | -2.555002000 | C | 3.675587000  | -1.418565000 | 0.176940000  |
| C  | -1.630598000 | 0.666146000  | 1.001285000  | H | 4.511676000  | -1.046812000 | 0.808094000  |
| C  | -3.055594000 | 0.624276000  | -0.831933000 | H | 3.615489000  | -2.518332000 | 0.301092000  |
| H  | -3.542782000 | 0.874041000  | -1.783374000 | H | 3.888025000  | -1.180299000 | -0.885060000 |
| C  | -1.954884000 | 1.337136000  | -0.232744000 | C | 2.333669000  | 1.109713000  | 0.192766000  |
| C  | -2.538962000 | -0.433969000 | 1.185866000  | H | 3.153651000  | 1.566267000  | 0.787659000  |
| H  | -2.553122000 | -1.126098000 | 2.037265000  | H | 2.600177000  | 1.160170000  | -0.882668000 |
|    |              |              |              | H | 1.407765000  | 1.691628000  | 0.367322000  |

**Table S37:** Optimized geometry of **P-1**. XYZ coordinated in angstroms. BP86/def2-SVP level of theory.

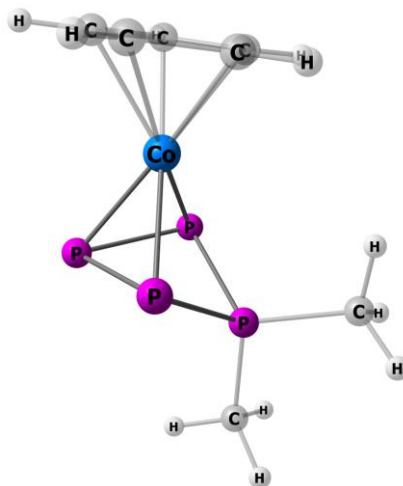

|    |              |              |              |   |              |              |              |
|----|--------------|--------------|--------------|---|--------------|--------------|--------------|
| Co | 0.609182000  | 0.311313000  | -0.559425000 | H | 0.952611000  | 1.879457000  | 1.796238000  |
| P  | -0.692893000 | -1.531183000 | -0.876921000 | H | 1.960298000  | 2.825149000  | -0.563458000 |
| P  | -2.382428000 | -0.253377000 | -0.251377000 | H | 2.801096000  | -1.506150000 | -0.366298000 |
| P  | -0.458087000 | 0.015699000  | -2.504208000 | H | 1.473488000  | -0.802242000 | 1.918429000  |
| P  | -1.279585000 | 1.500996000  | -1.016009000 | C | -2.690521000 | -0.229124000 | 1.568398000  |
| C  | 2.608350000  | 0.683367000  | -0.912176000 | H | -3.424307000 | 0.563419000  | 1.823932000  |
| H  | 3.099723000  | 0.734073000  | -1.892516000 | H | -3.080342000 | -1.211925000 | 1.906044000  |
| C  | 1.737227000  | -0.126942000 | 1.094063000  | H | -1.728330000 | -0.019349000 | 2.073739000  |
| C  | 2.450055000  | -0.498439000 | -0.109508000 | C | -4.047252000 | -0.608973000 | -0.980100000 |
| C  | 2.006681000  | 1.785930000  | -0.213414000 | H | -3.943682000 | -0.640733000 | -2.082236000 |
| C  | 1.463800000  | 1.282274000  | 1.029933000  | H | -4.423224000 | -1.588424000 | -0.617928000 |
|    |              |              |              | H | -4.766302000 | 0.189263000  | -0.701450000 |

**Table S38:** Optimized geometry of **P-2**. XYZ coordinated in angstroms. BP86/def2-SVP level of theory.

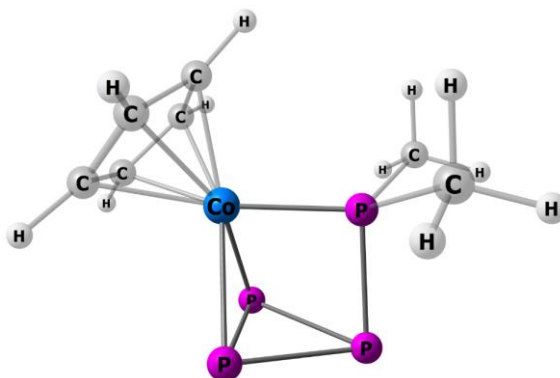

|    |              |              |              |   |              |              |              |
|----|--------------|--------------|--------------|---|--------------|--------------|--------------|
| Co | -0.826655000 | -0.345412000 | -0.495418000 | C | -2.702052000 | -0.869622000 | 0.247419000  |
| P  | 1.325315000  | -0.369194000 | -0.493066000 | H | -3.287598000 | -1.749943000 | -0.048653000 |
| P  | -0.579610000 | -2.137874000 | -1.931870000 | H | -0.437142000 | 0.894312000  | 2.026270000  |
| P  | 1.444464000  | -1.228840000 | -2.531136000 | H | -1.648395000 | 2.352106000  | 0.059989000  |
| P  | -0.561220000 | -0.134905000 | -2.778771000 | C | 2.257027000  | -1.453793000 | 0.689809000  |
| C  | -1.192561000 | 0.519732000  | 1.322103000  | H | 2.167449000  | -1.049953000 | 1.720095000  |
| C  | -2.756991000 | 0.423283000  | -0.382359000 | H | 1.812778000  | -2.467976000 | 0.667523000  |
| H  | -3.391848000 | 0.691483000  | -1.237049000 | H | 3.331014000  | -1.515172000 | 0.416401000  |
| C  | -1.830509000 | 1.294597000  | 0.288290000  | C | 2.293017000  | 1.213319000  | -0.434106000 |
| C  | -1.741281000 | -0.815862000 | 1.312482000  | H | 2.216849000  | 1.664560000  | 0.577482000  |
| H  | -1.478882000 | -1.633270000 | 1.995511000  | H | 3.362663000  | 1.036359000  | -0.671826000 |
|    |              |              |              | H | 1.864650000  | 1.920741000  | -1.170628000 |

### 4.3 Model system $[\text{Cp}^{\text{H}}\text{CoAs}_3]^- + \text{PMe}_2^+$

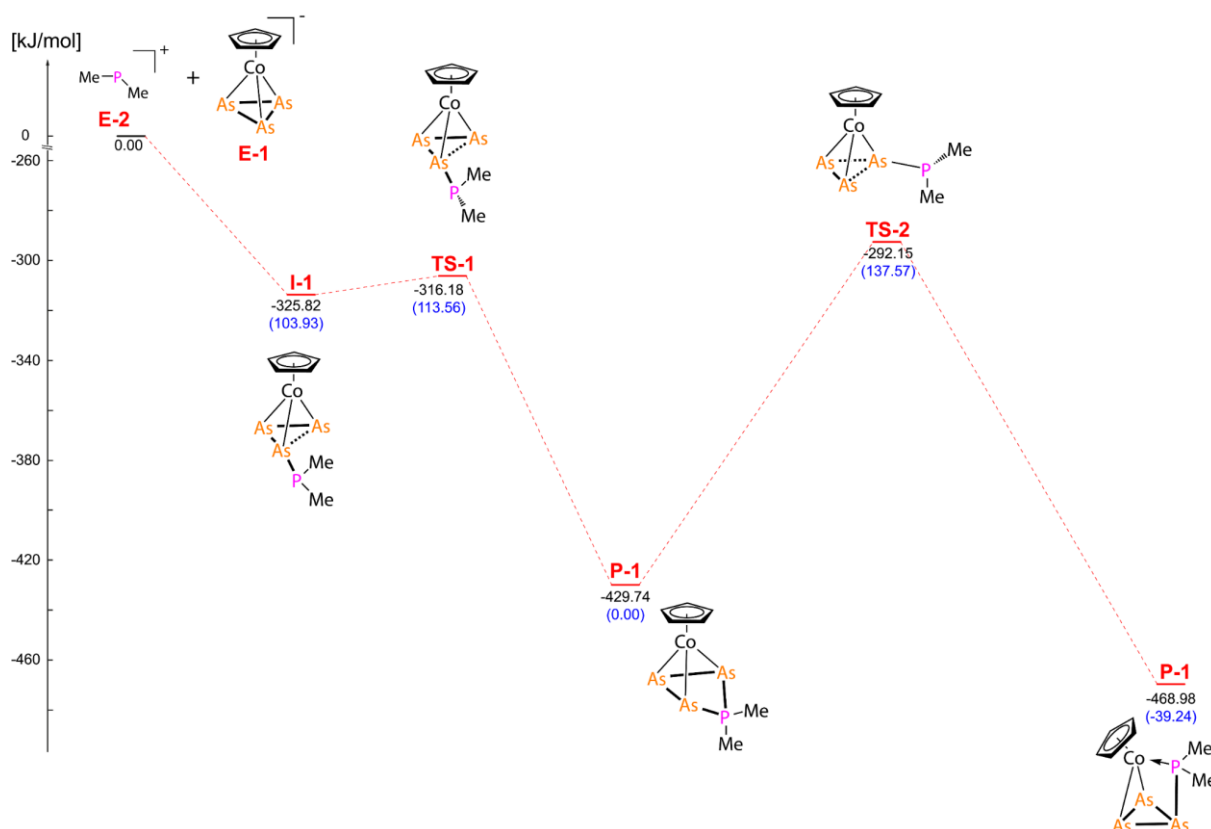

**Figure S74.** Pathway of the reaction of  $[\text{Cp}^{\text{H}}\text{CoAs}_3]^-$  with  $\text{PMe}_2^+$ . Optimization conducted at the BP86/def2-SVP level of theory. Energy values obtained from single point calculation at the B3LYP/def2-SVP level of theory including solvent effects and dispersion correction (GD3BJ).

**Table S39:** Total energies for optimized geometries, optimization at the BP86/def2-SVP level and single point energies at the B3LYP/def2-TZVP level of theory including solvent effects and dispersion correction GD3BJ.

|                                                    | BP86/def2-SVP<br>total energy [Ha] | B3LYP/def2-TZVP<br>total energy [Ha] |
|----------------------------------------------------|------------------------------------|--------------------------------------|
| <b>E-1</b> $\text{PMe}_2^+$                        | -420.715050551                     | -421.005180115                       |
| <b>E-2</b> $[\text{Cp}^{\text{H}}\text{CoAs}_3]^-$ | -8284.04643115                     | -8284.44318169                       |
| <b>I-1</b>                                         | -8705.02196608                     | -8705.57245879                       |
| <b>TS-1</b>                                        | -8705.02064556                     | -8705.56878951                       |
| <b>TS-2</b>                                        | -8705.01278625                     | -8705.55963690                       |
| <b>P-1</b>                                         | -8705.05420539                     | -8705.61204268                       |
| <b>P-2</b>                                         | -8705.06844349                     | -8705.62698683                       |

**Table S40:** Optimized geometry of **E-1**. XYZ coordinated in angstroms. BP86/def2-SVP level of theory.

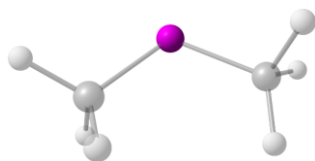

|   |             |              |              |   |             |             |              |
|---|-------------|--------------|--------------|---|-------------|-------------|--------------|
| P | 1.618447000 | -0.014501000 | 0.484690000  | C | 2.656163000 | 1.080504000 | -0.484410000 |
| C | 2.639334000 | -1.463838000 | 0.753196000  | H | 3.042674000 | 1.767027000 | 0.330530000  |
| H | 2.375612000 | -1.985642000 | 1.699019000  | H | 3.539469000 | 0.642516000 | -0.992861000 |
| H | 2.237274000 | -2.147228000 | -0.056873000 | H | 2.054242000 | 1.750885000 | -1.136111000 |
| H | 3.732183000 | -1.366078000 | 0.589760000  |   |             |             |              |

**Table S41:** Optimized geometry of **E-2**. XYZ coordinated in angstroms. BP86/def2-SVP level of theory.

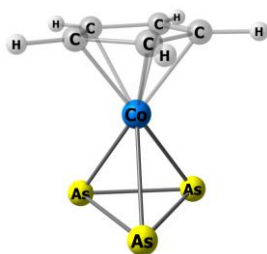

|    |              |              |              |   |              |              |              |
|----|--------------|--------------|--------------|---|--------------|--------------|--------------|
| Co | -1.645542000 | -0.693242000 | -0.993062000 | C | -2.314522000 | 1.168321000  | -0.464572000 |
| As | -0.763754000 | -2.837721000 | -1.619913000 | C | -1.844746000 | -0.576388000 | 1.031133000  |
| As | 0.369938000  | -0.799062000 | -2.302376000 | H | -1.344948000 | -1.196414000 | 1.788655000  |
| As | -1.768665000 | -1.390094000 | -3.293535000 | C | -3.122222000 | -0.856277000 | 0.406853000  |
| C  | -1.346614000 | 0.663640000  | 0.486137000  | H | -3.765163000 | -1.725413000 | 0.603638000  |
| C  | -3.398902000 | 0.212797000  | -0.523444000 | H | -0.398591000 | 1.149324000  | 0.757713000  |
| H  | -4.292633000 | 0.294518000  | -1.158518000 | H | -2.236270000 | 2.100393000  | -1.041081000 |

**Table S42:** Optimized geometry of **I-1**. XYZ coordinated in angstroms. BP86/def2-SVP level of theory.

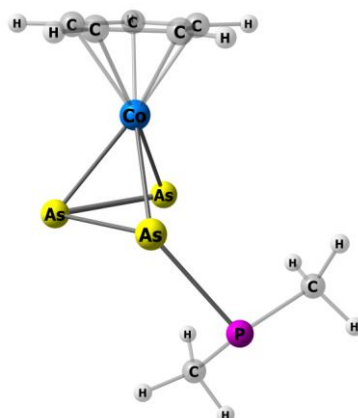

|    |              |              |              |   |              |              |              |
|----|--------------|--------------|--------------|---|--------------|--------------|--------------|
| Co | 1.403133000  | 0.255792000  | 0.026705000  | H | 3.193412000  | -0.225361000 | -2.166604000 |
| As | -0.413337000 | 0.068028000  | 1.324176000  | H | 3.222002000  | 0.690874000  | 2.161668000  |
| P  | -2.886835000 | 0.692202000  | -1.056554000 | H | 2.209614000  | 2.871757000  | 0.849147000  |
| As | 0.177576000  | -1.905079000 | 0.121163000  | C | -3.731149000 | -0.518357000 | 0.090604000  |
| As | -0.554035000 | -0.100383000 | -1.343093000 | H | -4.812345000 | -0.259647000 | 0.111872000  |
| C  | 3.391639000  | -0.224074000 | 0.091283000  | H | -3.635081000 | -1.540850000 | -0.327492000 |
| H  | 3.809541000  | -1.216715000 | 0.304144000  | H | -3.334556000 | -0.514606000 | 1.126222000  |
| C  | 2.534728000  | 1.929359000  | 0.390503000  | C | -2.866063000 | 2.243520000  | -0.005172000 |
| C  | 3.074329000  | 0.786128000  | 1.077914000  | H | -2.626865000 | 2.063744000  | 1.062679000  |
| C  | 3.066847000  | 0.293527000  | -1.208233000 | H | -2.129631000 | 2.958979000  | -0.424288000 |
| C  | 2.509691000  | 1.610881000  | -1.017209000 | H | -3.871321000 | 2.713671000  | -0.079027000 |
| H  | 2.133776000  | 2.265775000  | -1.814706000 |   |              |              |              |

**Table S43:** Optimized geometry of **TS-1**. XYZ coordinated in angstroms. BP86/def2-SVP level of theory.

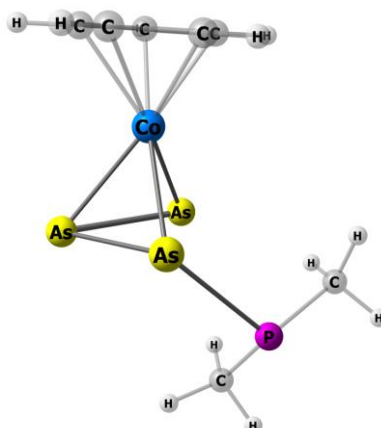

|    |              |              |              |   |              |              |              |
|----|--------------|--------------|--------------|---|--------------|--------------|--------------|
| Co | 1.556597000  | 0.205330000  | 0.006826000  | H | -0.154134000 | 2.206516000  | -1.116198000 |
| As | 2.260637000  | -1.751096000 | 0.914345000  | H | 4.047704000  | 0.829736000  | -1.235031000 |
| P  | 0.457432000  | -2.247329000 | 3.286474000  | H | 3.547541000  | 1.794347000  | 1.279591000  |
| As | 0.615596000  | -1.921281000 | -0.820032000 | C | 0.734426000  | -4.046669000 | 2.857039000  |
| As | -0.184136000 | -0.833842000 | 1.196816000  | H | 0.514646000  | -4.645836000 | 3.767531000  |
| C  | 1.884287000  | 1.368240000  | -1.648326000 | H | 0.009327000  | -4.343194000 | 2.072160000  |
| H  | 1.756391000  | 1.060320000  | -2.694315000 | H | 1.759772000  | -4.277993000 | 2.503418000  |
| C  | 2.829645000  | 1.742441000  | 0.450886000  | C | 2.039579000  | -1.791233000 | 4.188009000  |
| C  | 3.095069000  | 1.239162000  | -0.874653000 | H | 2.958325000  | -2.243548000 | 3.761023000  |
| C  | 0.873723000  | 1.966300000  | -0.816016000 | H | 2.147760000  | -0.687442000 | 4.192197000  |
| C  | 1.456833000  | 2.182733000  | 0.487126000  | H | 1.925289000  | -2.121355000 | 5.243897000  |
| H  | 0.944523000  | 2.618880000  | 1.354932000  |   |              |              |              |



**Table S44:** Optimized geometry of **TS-2**. XYZ coordinated in angstroms. BP86/def2-SVP level of theory.

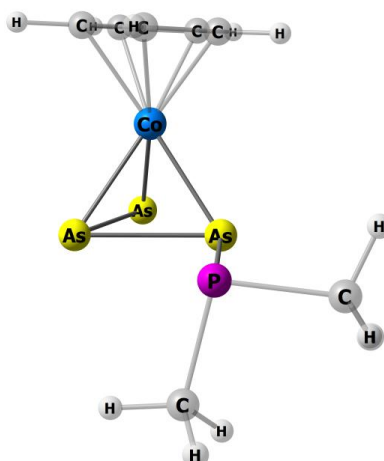

|    |              |              |              |   |              |              |              |
|----|--------------|--------------|--------------|---|--------------|--------------|--------------|
| Co | -1.587961000 | -0.663706000 | -0.487829000 | H | -4.426861000 | -1.149284000 | -0.665216000 |
| P  | 2.199702000  | -0.183659000 | 0.617345000  | H | -1.402672000 | 0.444732000  | 2.131701000  |
| As | -0.165253000 | -2.554468000 | -0.263836000 | H | -1.543485000 | 2.129582000  | -0.021819000 |
| As | 0.631617000  | -0.382202000 | -1.265781000 | C | 3.525086000  | -1.419707000 | 0.144452000  |
| As | -1.185110000 | -1.982607000 | -2.315699000 | H | 4.429018000  | -1.216755000 | 0.759267000  |
| C  | -2.059804000 | 0.329046000  | 1.260654000  | H | 3.170988000  | -2.445371000 | 0.370298000  |
| C  | -3.117910000 | 0.696987000  | -0.794859000 | H | 3.805606000  | -1.363782000 | -0.928258000 |
| H  | -3.418235000 | 1.148716000  | -1.748982000 | C | 3.051939000  | 1.371299000  | 0.002015000  |
| C  | -2.126944000 | 1.209972000  | 0.116367000  | H | 3.935185000  | 1.566194000  | 0.648975000  |
| C  | -2.998232000 | -0.737997000 | 1.042642000  | H | 3.398273000  | 1.295171000  | -1.050732000 |
| H  | -3.187678000 | -1.578441000 | 1.723081000  | H | 2.364629000  | 2.236530000  | 0.095308000  |
| C  | -3.651417000 | -0.511573000 | -0.220607000 |   |              |              |              |

**Table S45:** Optimized geometry of **P-1**. XYZ coordinated in angstroms. BP86/def2-SVP level of theory.

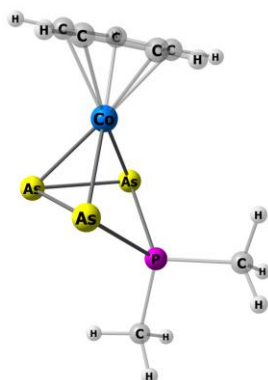

|    |              |              |              |   |              |              |              |
|----|--------------|--------------|--------------|---|--------------|--------------|--------------|
| Co | 0.687011000  | 0.327103000  | -0.555674000 | H | 1.082888000  | 1.903304000  | 1.790755000  |
| As | -0.655710000 | -1.618397000 | -0.785711000 | H | 2.052415000  | 2.842410000  | -0.590038000 |
| P  | -2.482007000 | -0.269947000 | -0.194876000 | H | 2.891773000  | -1.490736000 | -0.392044000 |
| As | -0.419646000 | 0.018064000  | -2.620394000 | H | 1.601699000  | -0.775204000 | 1.913122000  |
| As | -1.279642000 | 1.603919000  | -0.933600000 | C | -2.867503000 | -0.261456000 | 1.616680000  |
| C  | 2.678007000  | 0.694833000  | -0.948291000 | H | -3.612314000 | 0.527602000  | 1.851198000  |
| H  | 3.153392000  | 0.741759000  | -1.936704000 | H | -3.268671000 | -1.247148000 | 1.932640000  |
| C  | 1.849724000  | -0.106097000 | 1.078833000  | H | -1.929315000 | -0.054517000 | 2.167560000  |
| C  | 2.538014000  | -0.483730000 | -0.135704000 | C | -4.118250000 | -0.623332000 | -0.991564000 |
| C  | 2.095092000  | 1.802846000  | -0.240180000 | H | -3.971882000 | -0.645353000 | -2.089029000 |
| C  | 1.576536000  | 1.304270000  | 1.014401000  | H | -4.505941000 | -1.606798000 | -0.653030000 |
|    |              |              |              | H | -4.850111000 | 0.170685000  | -0.734598000 |

**Table S46:** Optimized geometry of **P-2**. XYZ coordinated in angstroms. BP86/def2-SVP level of theory.

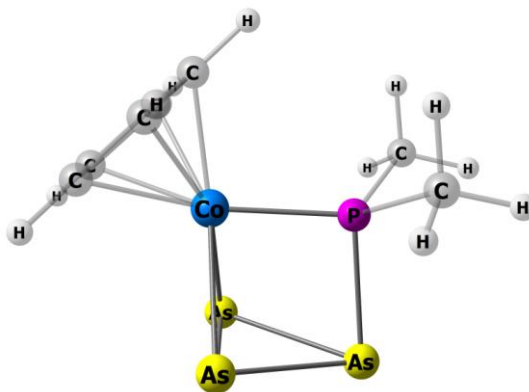

|    |              |              |              |   |              |              |              |
|----|--------------|--------------|--------------|---|--------------|--------------|--------------|
| Co | -0.826990000 | -0.356883000 | -0.520498000 | C | -2.693732000 | -0.855500000 | 0.270993000  |
| P  | 1.328435000  | -0.383937000 | -0.529437000 | H | -3.307979000 | -1.722013000 | -0.007231000 |
| As | -0.644726000 | -2.280446000 | -1.971648000 | H | -0.356681000 | 0.864636000  | 2.000800000  |
| As | 1.577051000  | -1.291459000 | -2.661196000 | H | -1.598864000 | 2.351336000  | 0.076424000  |
| As | -0.623261000 | -0.071333000 | -2.909828000 | C | 2.224628000  | -1.434872000 | 0.714313000  |
| C  | -1.134627000 | 0.504423000  | 1.313718000  | H | 2.062259000  | -1.027279000 | 1.734516000  |
| C  | -2.746765000 | 0.441177000  | -0.348894000 | H | 1.814481000  | -2.462863000 | 0.675879000  |
| H  | -3.407552000 | 0.726604000  | -1.178014000 | H | 3.314434000  | -1.464577000 | 0.505852000  |
| C  | -1.787235000 | 1.293991000  | 0.300577000  | C | 2.260064000  | 1.220693000  | -0.419094000 |
| C  | -1.700885000 | -0.823019000 | 1.308900000  | H | 2.102043000  | 1.679486000  | 0.579820000  |
| H  | -1.433784000 | -1.648054000 | 1.980780000  | H | 3.347618000  | 1.064875000  | -0.577158000 |
|    |              |              |              | H | 1.872551000  | 1.913691000  | -1.191081000 |

#### 4.4 Model system $[\text{Cp}^{\text{H}}\text{CoP}_3]^- + \text{PR}_2^+$

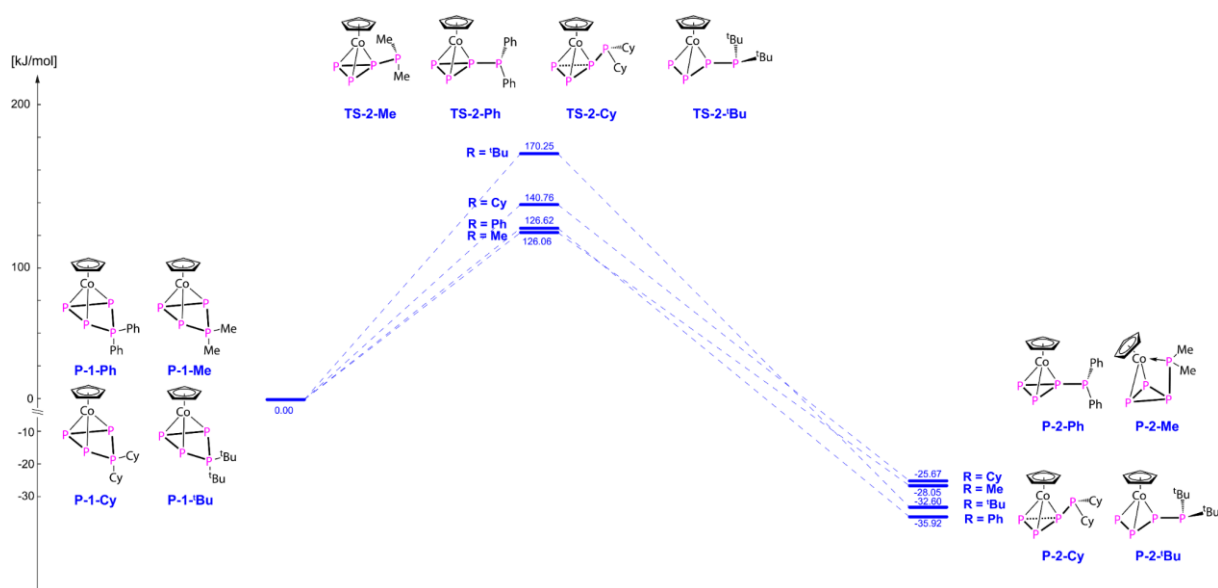

**Figure S75.** Pathway of the reaction of  $[\text{Cp}^{\text{H}}\text{CoP}_3]^-$  with  $\text{PR}_2^+$ . Optimization conducted at the BP86/def2-SVP level of theory. Energy values obtained from single point calculation at the B3LYP/def2-SVP level of theory including solvent effects and dispersion correction (GD3BJ).

**Table S47:** Total energies for optimized geometries, optimization at the BP86/def2-SVP level and single point energies at the B3LYP/def2-TZVP level of theory including solvent effects and dispersion correction GD3BJ.

|                 | BP86/def2-SVP<br>total energy [Ha] | B3LYP/def2-TZVP<br>total energy [Ha] |
|-----------------|------------------------------------|--------------------------------------|
| <b>P-1-Me</b>   | -3021.23818703                     | -3021.96079231                       |
| <b>P-1-Ph</b>   | -3404.42944279                     | -3405.60389269                       |
| <b>P-1-Cy</b>   | -3411.66581443                     | -3412.87356008                       |
| <b>P-1-tBu</b>  | -3256.91778493                     | -3257.94941136                       |
| <b>TS-2-Me</b>  | -3021.19664403                     | -3021.91277719                       |
| <b>TS-2-Ph</b>  | -3404.39101384                     | -3405.55566462                       |
| <b>TS-2-Cy</b>  | -3411.62620844                     | -3412.81994664                       |
| <b>TS-2-tBu</b> | -3256.86547658                     | -3257.88456659                       |
| <b>P-2-Me</b>   | -3021.25000834                     | -3021.97147658                       |
| <b>P-2-Ph</b>   | -3404.44236317                     | -3405.61757257                       |
| <b>P-2-Cy</b>   | -3411.67462868                     | -3412.88334421                       |
| <b>P-2-tBu</b>  | -3256.92767614                     | -3257.96182853                       |

**Table S48:** Optimized geometry of **P-1-Me**. XYZ coordinated in angstroms. BP86/def2-SVP level of theory.

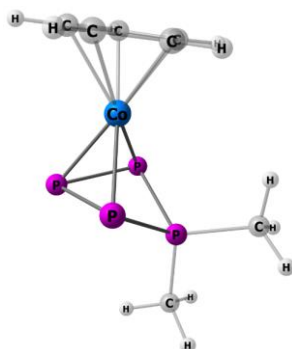

|    |              |              |              |   |              |              |              |
|----|--------------|--------------|--------------|---|--------------|--------------|--------------|
| Co | 0.609182000  | 0.311313000  | -0.559425000 | H | 0.952611000  | 1.879457000  | 1.796238000  |
| P  | -0.692893000 | -1.531183000 | -0.876921000 | H | 1.960298000  | 2.825149000  | -0.563458000 |
| P  | -2.382428000 | -0.253377000 | -0.251377000 | H | 2.801096000  | -1.506150000 | -0.366298000 |
| P  | -0.458087000 | 0.015699000  | -2.504208000 | H | 1.473488000  | -0.802242000 | 1.918429000  |
| P  | -1.279585000 | 1.500996000  | -1.016009000 | C | -2.690521000 | -0.229124000 | 1.568398000  |
| C  | 2.608350000  | 0.683367000  | -0.912176000 | H | -3.424307000 | 0.563419000  | 1.823932000  |
| H  | 3.099723000  | 0.734073000  | -1.892516000 | H | -3.080342000 | -1.211925000 | 1.906044000  |
| C  | 1.737227000  | -0.126942000 | 1.094063000  | H | -1.728330000 | -0.019349000 | 2.073739000  |
| C  | 2.450055000  | -0.498439000 | -0.109508000 | C | -4.047252000 | -0.608973000 | -0.980100000 |
| C  | 2.006681000  | 1.785930000  | -0.213414000 | H | -3.943682000 | -0.640733000 | -2.082236000 |
| C  | 1.463800000  | 1.282274000  | 1.029933000  | H | -4.423224000 | -1.588424000 | -0.617928000 |
|    |              |              |              | H | -4.766302000 | 0.189263000  | -0.701450000 |

**Table S49:** Optimized geometry of **P-1-Ph**. XYZ coordinated in angstroms. BP86/def2-SVP level of theory.

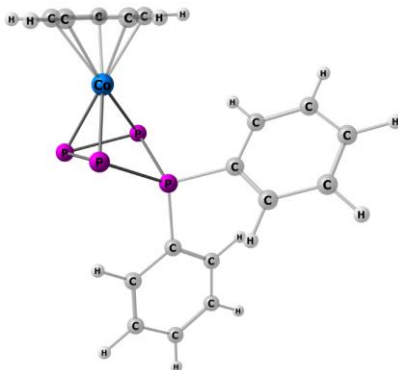

|    |              |              |              |   |              |              |              |
|----|--------------|--------------|--------------|---|--------------|--------------|--------------|
| Co | 0.915374000  | -0.488904000 | 0.417658000  | H | -4.107507000 | 3.551044000  | -2.461165000 |
| P  | -0.149765000 | -2.438957000 | 0.659933000  | C | -3.280554000 | 1.889509000  | -1.332076000 |
| P  | -0.838506000 | -0.656247000 | 1.851541000  | H | -3.727666000 | 1.126282000  | -1.989439000 |
| P  | -0.555265000 | -1.183698000 | -1.169791000 | C | -3.923712000 | -2.369666000 | -0.555625000 |
| C  | 2.951969000  | -0.768813000 | 0.601506000  | H | -3.040539000 | -2.844969000 | -1.012863000 |
| H  | 3.464635000  | -1.723608000 | 0.776425000  | C | -5.162538000 | -3.033121000 | -0.546591000 |
| C  | 2.472627000  | 0.129491000  | 1.617146000  | C | -3.804618000 | -1.086115000 | 0.021593000  |
| C  | 1.848902000  | 1.254634000  | 0.955192000  | H | -5.250079000 | -4.030941000 | -1.005033000 |
| H  | 1.398256000  | 2.123895000  | 1.451045000  | C | -6.284162000 | -2.426935000 | 0.045831000  |
| C  | 2.638235000  | -0.203977000 | -0.682157000 | C | -4.934174000 | -0.480953000 | 0.619871000  |
| C  | 1.949170000  | 1.049198000  | -0.462818000 | H | -4.849986000 | 0.518667000  | 1.075794000  |
| P  | -2.147604000 | -0.280519000 | 0.087585000  | C | -6.167728000 | -1.151618000 | 0.629669000  |
| C  | -2.151937000 | 3.846966000  | 0.347687000  | H | -7.044877000 | -0.674973000 | 1.095771000  |
| H  | -1.714121000 | 4.611512000  | 1.009016000  | H | -7.253861000 | -2.949684000 | 0.053779000  |
| C  | -1.925226000 | 2.484769000  | 0.610384000  | H | -3.106376000 | 5.299784000  | -0.963396000 |
| C  | -2.933264000 | 4.231811000  | -0.755907000 | H | 2.870168000  | -0.650310000 | -1.657747000 |
| H  | -1.307149000 | 2.178066000  | 1.469983000  | H | 1.579057000  | 1.726900000  | -1.242818000 |
| C  | -2.493830000 | 1.498515000  | -0.223917000 | H | 2.560131000  | -0.014998000 | 2.701610000  |
| C  | -3.495326000 | 3.251939000  | -1.595470000 |   |              |              |              |

**Table S50:** Optimized geometry of **P-1-Cy**. XYZ coordinated in angstroms. BP86/def2-SVP level of theory.

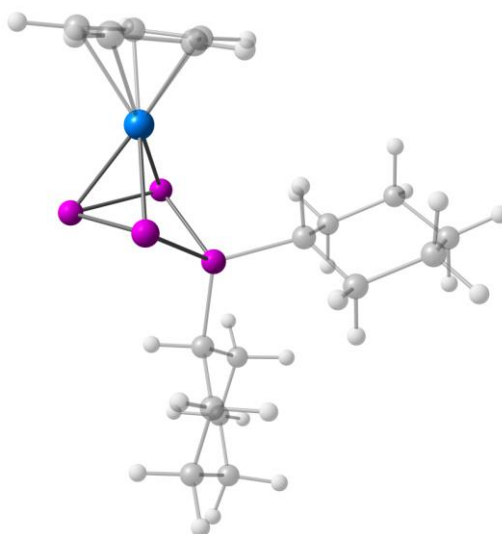

|    |              |              |              |   |              |              |              |
|----|--------------|--------------|--------------|---|--------------|--------------|--------------|
| Co | -1.137144000 | -0.324261000 | -0.534615000 | H | 1.173275000  | 1.594805000  | 0.822790000  |
| P  | -0.154707000 | -2.167855000 | -1.338614000 | C | 3.036577000  | 1.293692000  | 1.889945000  |
| P  | 0.601127000  | -0.146816000 | -1.998666000 | H | 4.264206000  | -0.117509000 | -2.181881000 |
| P  | 0.330439000  | -1.498766000 | 0.758344000  | H | 5.026153000  | 0.265529000  | -0.612889000 |
| C  | -3.177303000 | -0.442536000 | -0.837369000 | C | 5.817413000  | -1.530633000 | -1.551086000 |
| H  | -3.715210000 | -1.257448000 | -1.338937000 | C | 3.047445000  | 2.682276000  | 2.559520000  |
| C  | -2.641093000 | 0.729442000  | -1.473459000 | H | 2.011858000  | 2.938203000  | 2.881274000  |
| C  | -1.998903000 | 1.534769000  | -0.457369000 | H | 3.661856000  | 2.650159000  | 3.485206000  |
| H  | -1.509409000 | 2.503959000  | -0.618686000 | C | 3.568667000  | 3.769329000  | 1.603270000  |
| C  | -2.879913000 | -0.368723000 | 0.566966000  | H | 2.617956000  | 0.532436000  | 2.583078000  |
| C  | -2.144488000 | 0.855244000  | 0.800816000  | H | 4.085823000  | 0.988894000  | 1.675967000  |
| C  | 3.521089000  | -1.313538000 | -0.498246000 | H | 3.192509000  | 4.551170000  | -0.409524000 |
| P  | 1.935315000  | -0.334872000 | -0.235711000 | H | 1.724583000  | 4.105319000  | 0.493779000  |
| C  | 2.228998000  | 1.330545000  | 0.575867000  | H | 5.586429000  | -3.400395000 | 1.411886000  |
| H  | 3.792148000  | 2.151878000  | -0.720353000 | H | 4.828126000  | -3.790477000 | -0.150900000 |
| C  | 2.759713000  | 2.409737000  | -0.395074000 | C | 6.335826000  | -2.223004000 | -0.278530000 |
| H  | 2.135571000  | 2.436452000  | -1.314948000 | H | 4.642854000  | 3.573330000  | 1.378178000  |
| C  | 2.773501000  | 3.792206000  | 0.285987000  | H | 3.532385000  | 4.765651000  | 2.094338000  |
| H  | 3.133962000  | -2.115240000 | -1.171723000 | H | 6.790724000  | -1.458847000 | 0.393890000  |
| C  | 4.032920000  | -1.996562000 | 0.789214000  | H | 7.149951000  | -2.935790000 | -0.532123000 |
| C  | 4.649683000  | -0.571377000 | -1.243586000 | H | 5.470794000  | -2.301949000 | -2.276350000 |
| H  | 4.374124000  | -1.224878000 | 1.514428000  | H | 6.638147000  | -0.976032000 | -2.055528000 |
| H  | 3.204174000  | -2.549833000 | 1.281709000  | H | -1.779618000 | 1.209218000  | 1.773929000  |
| C  | 5.203697000  | -2.946747000 | 0.472134000  | H | -3.154598000 | -1.112264000 | 1.326177000  |
|    |              |              |              | H | -2.701832000 | 0.967923000  | -2.543132000 |

**Table S51:** Optimized geometry of **P-1-<sup>t</sup>Bu**. XYZ coordinated in angstroms. BP86/def2-SVP level of theory.

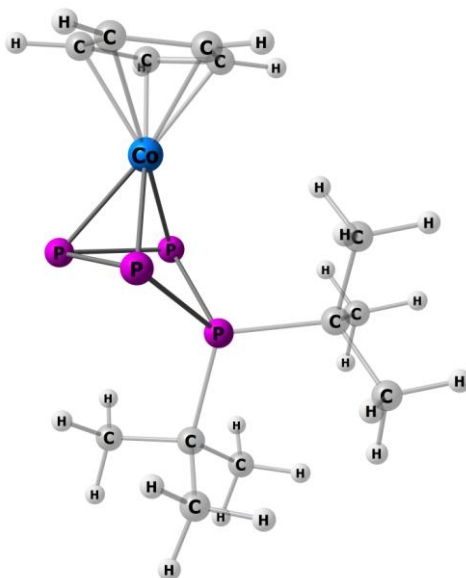

|    |              |              |              |   |              |              |              |
|----|--------------|--------------|--------------|---|--------------|--------------|--------------|
| Co | 0.561484000  | 0.018295000  | -0.341864000 | H | -4.397357000 | 1.793072000  | 2.751172000  |
| P  | -0.938516000 | -1.672334000 | -0.029599000 | H | -5.212002000 | 0.808262000  | 1.505443000  |
| P  | -2.608535000 | -0.181002000 | -0.078270000 | C | -1.815835000 | 1.372608000  | 2.117720000  |
| P  | -0.465643000 | -0.874736000 | -2.085794000 | H | -0.861797000 | 0.819446000  | 2.034221000  |
| P  | -1.222828000 | 1.093047000  | -1.294539000 | H | -1.962212000 | 1.695036000  | 3.172319000  |
| C  | 2.143049000  | 1.319454000  | -0.608290000 | H | -1.726586000 | 2.283183000  | 1.489797000  |
| H  | 2.205671000  | 2.122732000  | -1.353600000 | C | -4.963992000 | 0.514747000  | -1.508466000 |
| C  | 2.312039000  | -0.762148000 | 0.425317000  | H | -5.383619000 | 1.131266000  | -0.691340000 |
| C  | 2.572348000  | -0.040966000 | -0.790694000 | H | -5.811015000 | 0.200351000  | -2.157602000 |
| C  | 1.605251000  | 1.438423000  | 0.727358000  | H | -4.295657000 | 1.156563000  | -2.120233000 |
| C  | -3.014900000 | 0.502454000  | 1.688157000  | C | -5.115936000 | -1.605453000 | -0.089567000 |
| C  | 1.710088000  | 0.155693000  | 1.366108000  | H | -4.571161000 | -2.491904000 | 0.296886000  |
| H  | 1.414019000  | -0.081346000 | 2.396533000  | H | -5.977403000 | -1.982941000 | -0.683706000 |
| C  | -4.222233000 | -0.739634000 | -1.000234000 | H | -5.534351000 | -1.047207000 | 0.770735000  |
| C  | -3.135983000 | -0.703132000 | 2.645529000  | C | -3.794881000 | -1.591096000 | -2.213945000 |
| H  | -4.003851000 | -1.350745000 | 2.414052000  | H | -3.173654000 | -1.016987000 | -2.929375000 |
| H  | -3.261253000 | -0.333043000 | 3.686999000  | H | -4.710146000 | -1.929894000 | -2.747906000 |
| H  | -2.221396000 | -1.332611000 | 2.621558000  | H | -3.219058000 | -2.488450000 | -1.910842000 |
| C  | -4.285898000 | 1.373645000  | 1.726856000  | H | 1.204655000  | 2.355383000  | 1.178669000  |
| H  | -4.220546000 | 2.232355000  | 1.027421000  | H | 3.018060000  | -0.458089000 | -1.703018000 |
|    |              |              |              | H | 2.524565000  | -1.823974000 | 0.604516000  |

**Table S52:** Optimized geometry of **TS-2-Me**. XYZ coordinated in angstroms. BP86/def2-SVP level of theory.

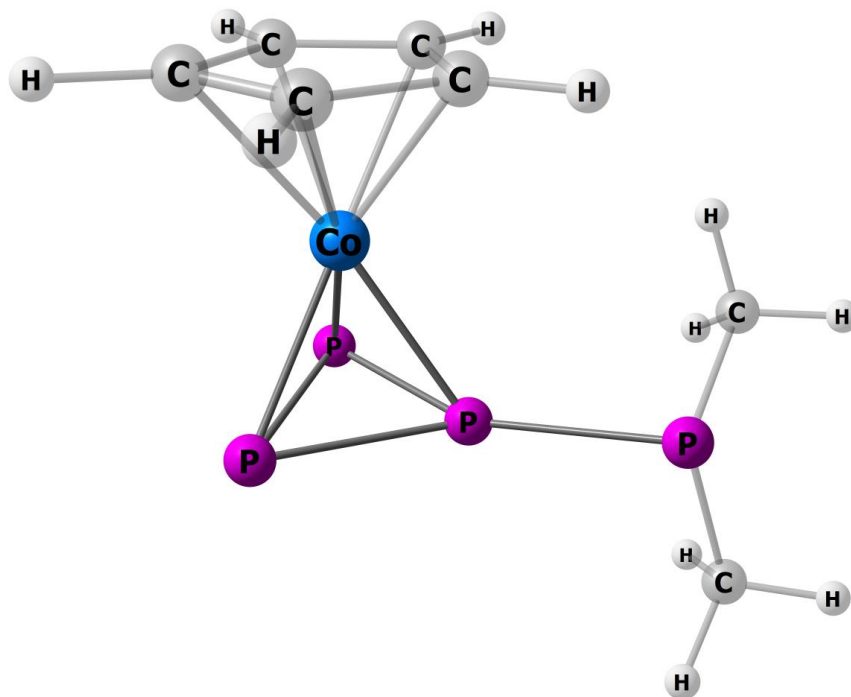

|    |              |              |              |   |              |              |              |
|----|--------------|--------------|--------------|---|--------------|--------------|--------------|
| Co | -1.490821000 | -0.648751000 | -0.580141000 | C | -3.420816000 | -0.464346000 | 0.044773000  |
| P  | 2.095229000  | -0.641425000 | 0.810765000  | H | -4.230306000 | -1.185596000 | -0.126321000 |
| P  | -0.968935000 | -2.789148000 | -0.990314000 | H | -0.831978000 | 0.949978000  | 1.699767000  |
| P  | 0.641971000  | -1.355588000 | -0.755551000 | H | -1.460717000 | 2.227600000  | -0.641997000 |
| P  | -0.603242000 | -1.159348000 | -2.555002000 | C | 3.675587000  | -1.418565000 | 0.176940000  |
| C  | -1.630598000 | 0.666146000  | 1.001285000  | H | 4.511676000  | -1.046812000 | 0.808094000  |
| C  | -3.055594000 | 0.624276000  | -0.831933000 | H | 3.615489000  | -2.518332000 | 0.301092000  |
| H  | -3.542782000 | 0.874041000  | -1.783374000 | H | 3.888025000  | -1.180299000 | -0.885060000 |
| C  | -1.954884000 | 1.337136000  | -0.232744000 | C | 2.333669000  | 1.109713000  | 0.192766000  |
| C  | -2.538962000 | -0.433969000 | 1.185866000  | H | 3.153651000  | 1.566267000  | 0.787659000  |
| H  | -2.553122000 | -1.126098000 | 2.037265000  | H | 2.600177000  | 1.160170000  | -0.882668000 |
|    |              |              |              | H | 1.407765000  | 1.691628000  | 0.367322000  |

**Table S53:** Optimized geometry of **TS-2-Ph**. XYZ coordinated in angstroms. BP86/def2-SVP level of theory.

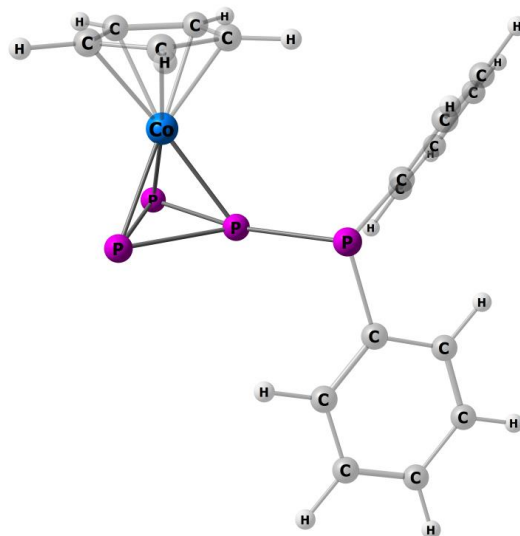

|    |              |              |              |   |             |              |              |
|----|--------------|--------------|--------------|---|-------------|--------------|--------------|
| Co | 1.697155000  | 1.788747000  | -4.338593000 | H | 7.943038000 | 0.566852000  | 1.426155000  |
| P  | 3.800625000  | 0.289302000  | -1.417930000 | C | 8.405439000 | 0.057718000  | -0.640405000 |
| P  | 3.561114000  | 0.995306000  | -5.345226000 | C | 6.502930000 | -0.033905000 | -2.160727000 |
| P  | 3.658586000  | 1.624288000  | -3.272213000 | H | 6.101365000 | -0.197100000 | -3.174758000 |
| P  | 3.321524000  | 3.191723000  | -4.821481000 | C | 7.881400000 | -0.156518000 | -1.928848000 |
| C  | 0.204326000  | 1.348311000  | -2.977208000 | H | 8.551957000 | -0.420267000 | -2.762227000 |
| C  | -0.106787000 | 2.540590000  | -4.943679000 | H | 9.487606000 | -0.040393000 | -0.459625000 |
| H  | -0.259032000 | 3.363365000  | -5.654229000 | C | 2.040502000 | 1.026461000  | 0.627311000  |
| C  | 0.007914000  | 2.668537000  | -3.512006000 | H | 1.634937000 | 0.012583000  | 0.473471000  |
| C  | 0.189519000  | 0.399128000  | -4.061004000 | C | 1.470938000 | 1.870460000  | 1.597526000  |
| H  | 0.301905000  | -0.688833000 | -3.973261000 | C | 3.139299000 | 1.464128000  | -0.148570000 |
| C  | 0.005385000  | 1.141417000  | -5.283117000 | H | 0.619591000 | 1.515875000  | 2.200089000  |
| H  | -0.050008000 | 0.715958000  | -6.293404000 | C | 1.987634000 | 3.162330000  | 1.795413000  |
| H  | 0.340615000  | 1.106082000  | -1.915355000 | C | 3.652636000 | 2.767394000  | 0.058517000  |
| H  | -0.038809000 | 3.600743000  | -2.935172000 | H | 4.502278000 | 3.123080000  | -0.546068000 |
| C  | 6.160207000  | 0.531732000  | 0.185955000  | C | 3.077438000 | 3.608779000  | 1.023660000  |
| H  | 5.494867000  | 0.800510000  | 1.021208000  | H | 3.480357000 | 4.623314000  | 1.173019000  |
| C  | 7.541124000  | 0.398188000  | 0.414143000  | H | 1.539676000 | 3.825894000  | 2.552151000  |
| C  | 5.626328000  | 0.320679000  | -1.106826000 |   |             |              |              |



**Table S54:** Optimized geometry of **TS-2-Cy**. XYZ coordinated in angstroms. BP86/def2-SVP level of theory.

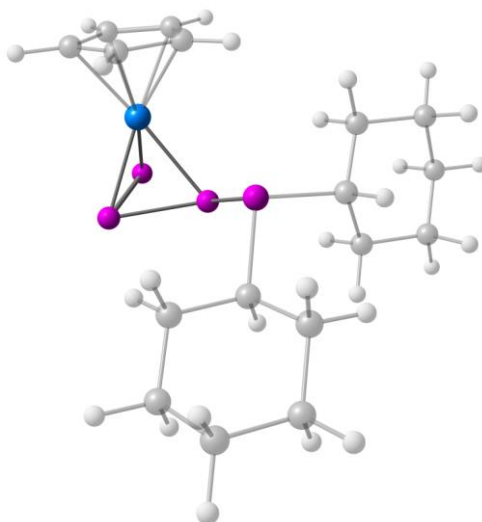

|    |              |              |              |   |             |              |              |
|----|--------------|--------------|--------------|---|-------------|--------------|--------------|
| Co | -1.110302000 | 0.387824000  | -0.221436000 | H | 2.814739000 | -1.102094000 | 2.635444000  |
| P  | -0.253268000 | -1.721597000 | -0.026484000 | H | 2.060268000 | -2.091235000 | 1.360719000  |
| P  | 0.992997000  | -0.284853000 | -1.102301000 | C | 3.955188000 | -2.883395000 | 2.109627000  |
| P  | -1.279820000 | -0.943001000 | -1.831971000 | H | 4.380337000 | 2.054955000  | -0.427818000 |
| C  | -1.077873000 | 1.480053000  | 1.565125000  | C | 4.050313000 | 0.852787000  | -2.205776000 |
| C  | -1.776560000 | 2.355772000  | -0.491729000 | H | 5.568905000 | 0.306799000  | 0.362869000  |
| H  | -1.791859000 | 2.919938000  | -1.432881000 | H | 4.930946000 | 0.367803000  | 2.025951000  |
| C  | -0.696914000 | 2.315800000  | 0.460233000  | C | 5.985287000 | -1.479564000 | 1.540529000  |
| C  | -2.383328000 | 0.954615000  | 1.277747000  | C | 4.830403000 | 1.747564000  | -3.189100000 |
| H  | -2.958120000 | 0.268757000  | 1.913662000  | H | 5.754667000 | 2.122447000  | -2.690552000 |
| C  | -2.816012000 | 1.500780000  | 0.004731000  | H | 5.170648000 | 1.144123000  | -4.058663000 |
| H  | -3.776454000 | 1.298517000  | -0.486974000 | C | 3.989295000 | 2.945757000  | -3.659598000 |
| H  | -0.463762000 | 1.256508000  | 2.445892000  | H | 4.698056000 | 0.019499000  | -1.859908000 |
| H  | 0.262876000  | 2.838663000  | 0.365809000  | H | 3.191141000 | 0.379713000  | -2.733826000 |
| C  | 3.681710000  | -0.791518000 | 0.661877000  | H | 2.820719000 | 4.594931000  | -2.811903000 |
| P  | 2.542909000  | 0.697971000  | 0.329144000  | H | 4.321946000 | 4.222627000  | -1.929163000 |
| C  | 3.509386000  | 1.656266000  | -1.004235000 | H | 3.465928000 | -3.503246000 | 2.891922000  |
| H  | 1.750777000  | 2.497826000  | -1.974854000 | H | 4.088448000 | -3.547894000 | 1.224958000  |
| C  | 2.677737000  | 2.869653000  | -1.478268000 | C | 5.330619000 | -2.392821000 | 2.589443000  |
| H  | 2.348508000  | 3.470459000  | -0.601971000 | H | 3.126721000 | 2.575143000  | -4.260179000 |
| C  | 3.462128000  | 3.756209000  | -2.463862000 | H | 4.583972000 | 3.596320000  | -4.336980000 |
| H  | 3.813886000  | -1.373306000 | -0.279674000 | H | 5.207156000 | -1.827525000 | 3.542210000  |
| C  | 3.037324000  | -1.708152000 | 1.726333000  | H | 5.994596000 | -3.253537000 | 2.821998000  |
| C  | 5.069476000  | -0.302951000 | 1.145438000  | H | 6.219370000 | -2.076920000 | 0.629377000  |
|    |              |              |              | H | 6.956732000 | -1.087285000 | 1.913195000  |

**Table S55:** Optimized geometry of **TS-2-<sup>t</sup>Bu**. XYZ coordinated in angstroms. BP86/def2-SVP level of theory.

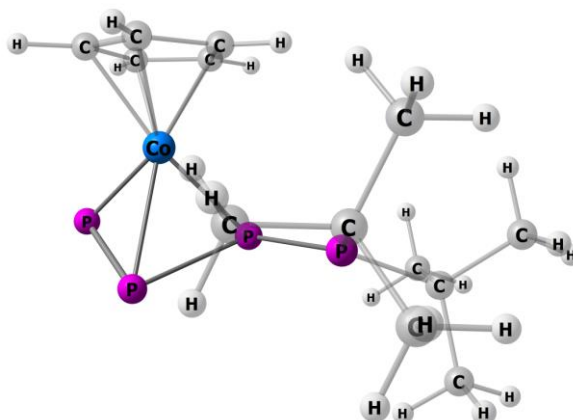

|    |              |              |              |   |              |              |              |
|----|--------------|--------------|--------------|---|--------------|--------------|--------------|
| Co | 1.973693000  | 0.138414000  | -0.529087000 | H | -2.627022000 | -2.531628000 | 1.967572000  |
| P  | -1.708533000 | -0.345456000 | 0.067335000  | H | -4.187615000 | -3.042596000 | 1.237515000  |
| P  | 0.504884000  | 1.280237000  | -2.209153000 | C | -4.201124000 | -1.314628000 | -0.928400000 |
| P  | 0.008909000  | -0.667518000 | -1.199976000 | C | -3.473932000 | -2.194036000 | 1.336465000  |
| P  | 2.492865000  | 0.677190000  | -2.535420000 | C | -2.311801000 | -2.965272000 | -0.750948000 |
| C  | 2.522624000  | 0.971991000  | 1.360430000  | H | -1.441977000 | -3.331696000 | -0.169036000 |
| C  | 2.728882000  | -1.266810000 | 0.749236000  | H | -3.047480000 | -3.796192000 | -0.834134000 |
| H  | 2.552200000  | -2.346829000 | 0.669381000  | H | -1.960383000 | -2.718873000 | -1.772837000 |
| C  | 1.951154000  | -0.332537000 | 1.520964000  | C | -2.082549000 | 1.087952000  | 1.300516000  |
| C  | 3.662418000  | 0.858986000  | 0.495429000  | H | -4.272320000 | 0.763847000  | 1.449818000  |
| H  | 4.316721000  | 1.679905000  | 0.175684000  | H | -3.773847000 | 1.846635000  | 0.102735000  |
| C  | 3.787162000  | -0.525240000 | 0.106445000  | H | -3.724291000 | 2.427074000  | 1.802715000  |
| H  | 4.564786000  | -0.943662000 | -0.545455000 | H | -1.372540000 | 2.629083000  | -0.111326000 |
| H  | 2.147031000  | 1.901515000  | 1.807807000  | H | -0.081760000 | 1.928873000  | 0.904817000  |
| H  | 1.050312000  | -0.579352000 | 2.096725000  | H | -1.262281000 | 3.079182000  | 1.628244000  |
| C  | -2.998006000 | -1.763062000 | -0.066851000 | C | -3.547858000 | 1.546053000  | 1.145441000  |
| H  | -3.875734000 | -1.010159000 | -1.943476000 | C | -1.144352000 | 2.243810000  | 0.902895000  |
| H  | -4.746487000 | -0.463631000 | -0.475519000 | C | -1.809203000 | 0.668777000  | 2.760953000  |
| H  | -4.923051000 | -2.156181000 | -1.035078000 | H | -0.748963000 | 0.383597000  | 2.911547000  |
| H  | -4.007270000 | -1.383536000 | 1.873070000  | H | -2.029392000 | 1.520930000  | 3.443800000  |
|    |              |              |              | H | -2.440326000 | -0.184389000 | 3.077112000  |

**Table S56:** Optimized geometry of **P-2-Me**. XYZ coordinated in angstroms. BP86/def2-SVP level of theory.

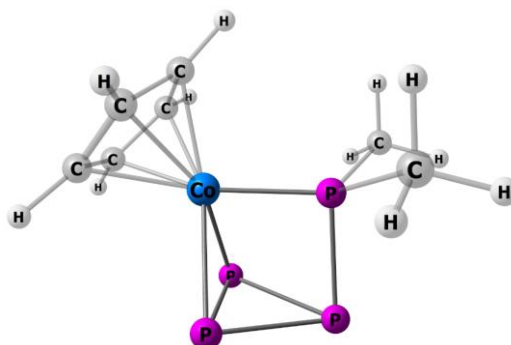

|    |              |              |              |   |              |              |              |
|----|--------------|--------------|--------------|---|--------------|--------------|--------------|
| Co | -0.826655000 | -0.345412000 | -0.495418000 | C | -2.702052000 | -0.869622000 | 0.247419000  |
| P  | 1.325315000  | -0.369194000 | -0.493066000 | H | -3.287598000 | -1.749943000 | -0.048653000 |
| P  | -0.579610000 | -2.137874000 | -1.931870000 | H | -0.437142000 | 0.894312000  | 2.026270000  |
| P  | 1.444464000  | -1.228840000 | -2.531136000 | H | -1.648395000 | 2.352106000  | 0.059989000  |
| P  | -0.561220000 | -0.134905000 | -2.778771000 | C | 2.257027000  | -1.453793000 | 0.689809000  |
| C  | -1.192561000 | 0.519732000  | 1.322103000  | H | 2.167449000  | -1.049953000 | 1.720095000  |
| C  | -2.756991000 | 0.423283000  | -0.382359000 | H | 1.812778000  | -2.467976000 | 0.667523000  |
| H  | -3.391848000 | 0.691483000  | -1.237049000 | H | 3.331014000  | -1.515172000 | 0.416401000  |
| C  | -1.830509000 | 1.294597000  | 0.288290000  | C | 2.293017000  | 1.213319000  | -0.434106000 |
| C  | -1.741281000 | -0.815862000 | 1.312482000  | H | 2.216849000  | 1.664560000  | 0.577482000  |
| H  | -1.478882000 | -1.633270000 | 1.995511000  | H | 3.362663000  | 1.036359000  | -0.671826000 |
|    |              |              |              | H | 1.864650000  | 1.920741000  | -1.170628000 |

**Table S57:** Optimized geometry of **P-2-Ph**. XYZ coordinated in angstroms. BP86/def2-SVP level of theory.

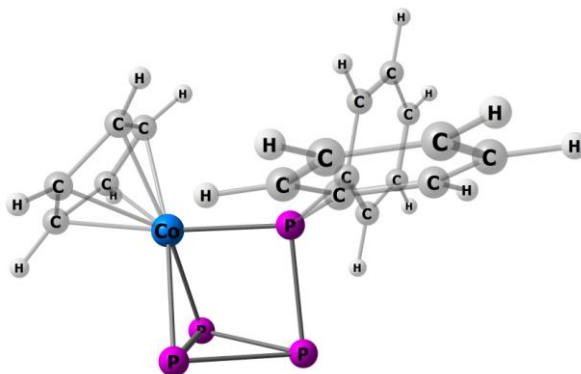

|    |              |              |              |   |              |              |              |
|----|--------------|--------------|--------------|---|--------------|--------------|--------------|
| Co | -0.721794000 | -0.211442000 | -0.490674000 | H | 0.517582000  | -2.760868000 | 0.731083000  |
| P  | 1.426114000  | -0.397882000 | -0.693097000 | C | 2.351086000  | -1.773688000 | 0.124259000  |
| P  | -0.753587000 | -1.736865000 | -2.227178000 | C | 3.687428000  | -3.989589000 | 1.254724000  |
| P  | 1.271719000  | -0.869232000 | -2.864991000 | H | 4.210213000  | -4.852695000 | 1.696802000  |
| P  | -0.647083000 | 0.374197000  | -2.727869000 | C | 3.540236000  | 3.132846000  | -1.266861000 |
| C  | -1.012421000 | 1.025169000  | 1.153544000  | H | 3.761327000  | 3.811058000  | -2.106454000 |
| C  | 2.974554000  | 1.390809000  | 0.864839000  | C | -1.097938000 | -0.367086000 | 1.547942000  |
| H  | 2.763156000  | 0.709558000  | 1.705434000  | H | -0.462078000 | -0.862961000 | 2.292947000  |
| C  | 3.720364000  | 2.559629000  | 1.090190000  | C | 4.424473000  | -2.949507000 | 0.658468000  |
| H  | 4.083255000  | 2.788253000  | 2.105196000  | H | 5.524902000  | -2.998242000 | 0.630207000  |
| C  | 3.762923000  | -1.846986000 | 0.093263000  | C | -2.161326000 | -0.975723000 | 0.807567000  |
| H  | 4.347721000  | -1.038658000 | -0.374169000 | C | 4.004997000  | 3.433933000  | 0.025182000  |
| C  | 2.792846000  | 1.964598000  | -1.496579000 | H | 4.590732000  | 4.349736000  | 0.203283000  |
| H  | 2.426070000  | 1.736625000  | -2.510950000 | C | 2.283485000  | -3.924734000 | 1.283105000  |
| C  | 2.507090000  | 1.079544000  | -0.433945000 | H | 1.701439000  | -4.737302000 | 1.746664000  |
| C  | -2.728417000 | 0.029265000  | -0.056401000 | H | -2.216958000 | 2.222258000  | -0.333240000 |
| H  | -3.554781000 | -0.120341000 | -0.763469000 | H | -0.291747000 | 1.760419000  | 1.534206000  |
| C  | -2.021641000 | 1.267258000  | 0.170864000  | H | -2.485358000 | -2.022053000 | 0.877552000  |
| C  | 1.617608000  | -2.822283000 | 0.720684000  |   |              |              |              |

**Table S58:** Optimized geometry of **P-2-Cy**. XYZ coordinated in angstroms. BP86/def2-SVP level of theory.

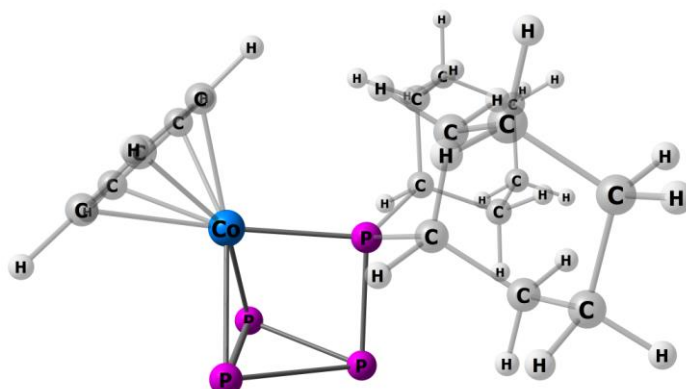

|    |              |              |              |   |              |              |              |
|----|--------------|--------------|--------------|---|--------------|--------------|--------------|
| P  | 2.294421000  | -1.122241000 | 1.620123000  | H | -0.496217000 | 2.296167000  | 0.611556000  |
| P  | 2.255126000  | 1.051422000  | 1.728604000  | C | -1.512560000 | 1.991817000  | -1.263178000 |
| P  | 0.431679000  | -0.111553000 | 2.491399000  | H | -1.815260000 | -1.909105000 | 2.069229000  |
| Co | 1.895155000  | 0.058444000  | -0.319755000 | H | -3.072812000 | -1.190171000 | 1.030712000  |
| C  | 1.699648000  | 0.146725000  | -2.370226000 | C | -2.837238000 | -3.336577000 | 0.757606000  |
| C  | 2.435571000  | -1.038521000 | -2.007792000 | C | -2.148457000 | 3.396007000  | -1.301043000 |
| H  | 2.160736000  | -2.074381000 | -2.241514000 | H | -1.402086000 | 4.140398000  | -0.939912000 |
| C  | 2.421384000  | 1.306156000  | -1.908710000 | H | -2.385038000 | 3.676729000  | -2.350446000 |
| H  | 2.138194000  | 2.355177000  | -2.059413000 | C | -3.410041000 | 3.476341000  | -0.424045000 |
| C  | 3.607338000  | -0.606819000 | -1.297674000 | H | -0.576209000 | 1.979121000  | -1.859427000 |
| C  | 3.598224000  | 0.830831000  | -1.235976000 | H | -2.206337000 | 1.264299000  | -1.741134000 |
| C  | -1.182249000 | -1.568933000 | -0.002438000 | H | -4.054436000 | 3.038104000  | 1.623972000  |
| P  | -0.176072000 | -0.007807000 | 0.353360000  | H | -2.423870000 | 3.742238000  | 1.500961000  |
| C  | -1.220211000 | 1.558307000  | 0.189902000  | H | -2.793552000 | -3.052782000 | -2.740916000 |
| H  | -3.242458000 | 0.880502000  | 0.668882000  | H | -1.527755000 | -3.781257000 | -1.721492000 |
| C  | -2.497767000 | 1.613003000  | 1.053977000  | C | -3.402975000 | -3.432183000 | -0.670334000 |
| H  | -2.271116000 | 1.317701000  | 2.101531000  | H | -4.201959000 | 2.824649000  | -0.861365000 |
| C  | -3.122953000 | 3.021876000  | 1.017484000  | H | -3.820798000 | 4.509131000  | -0.430534000 |
| H  | -0.371764000 | -2.332366000 | 0.066590000  | H | -4.285158000 | -2.756556000 | -0.760399000 |
| C  | -1.761597000 | -1.637478000 | -1.431563000 | H | -3.778184000 | -4.459007000 | -0.871043000 |
| C  | -2.251939000 | -1.940016000 | 1.047179000  | H | -2.036294000 | -4.099958000 | 0.889169000  |
| H  | -2.565125000 | -0.874694000 | -1.543232000 | H | -3.623386000 | -3.579439000 | 1.504962000  |
| H  | -0.979207000 | -1.386842000 | -2.179403000 | H | 4.359604000  | 1.454078000  | -0.748705000 |
| C  | -2.352287000 | -3.031754000 | -1.720652000 | H | 4.376232000  | -1.259932000 | -0.864153000 |
|    |              |              |              | H | 0.760664000  | 0.165553000  | -2.939268000 |

**Table S59:** Optimized geometry of **P-2-tBu**. XYZ coordinated in angstroms. BP86/def2-SVP level of theory.

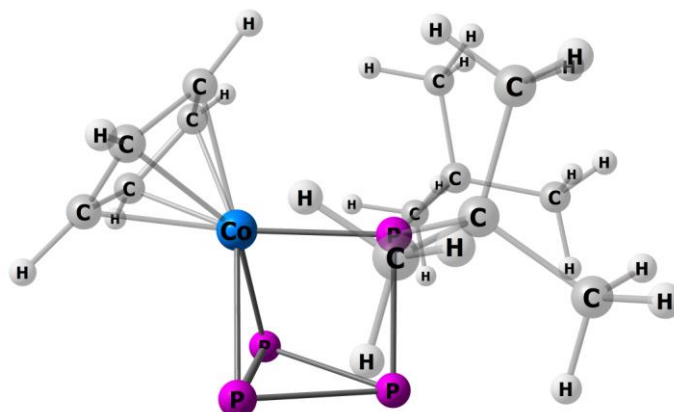

|    |              |              |              |   |              |              |              |
|----|--------------|--------------|--------------|---|--------------|--------------|--------------|
| Co | 0.165879000  | 0.240254000  | -0.403520000 | C | -2.352316000 | -2.422648000 | 1.138650000  |
| P  | -2.016855000 | 0.093541000  | -0.179207000 | H | -2.698140000 | -1.952065000 | 2.078375000  |
| P  | -0.335634000 | 2.012354000  | -1.792087000 | H | -2.752222000 | -3.460733000 | 1.120931000  |
| P  | -2.321550000 | 0.948221000  | -2.222536000 | H | -1.247081000 | -2.494988000 | 1.172273000  |
| P  | -0.271361000 | 0.032397000  | -2.664797000 | C | -2.952377000 | 1.292329000  | 1.041009000  |
| C  | 1.290450000  | -1.313566000 | 0.437663000  | H | -2.155959000 | 0.321131000  | 2.862723000  |
| C  | 2.152051000  | 0.781093000  | -0.111409000 | H | -3.822324000 | -0.203852000 | 2.433181000  |
| H  | 2.678385000  | 1.581161000  | -0.648519000 | H | -3.544301000 | 1.415239000  | 3.131334000  |
| C  | 2.072767000  | -0.596012000 | -0.524893000 | H | -5.044988000 | 0.879039000  | 0.406638000  |
| C  | 0.870684000  | -0.362363000 | 1.440935000  | H | -4.221509000 | 2.154327000  | -0.547599000 |
| H  | 0.265633000  | -0.593847000 | 2.327482000  | H | -4.769605000 | 2.493524000  | 1.123514000  |
| C  | 1.419860000  | 0.926711000  | 1.117172000  | C | -3.123877000 | 0.656125000  | 2.435051000  |
| C  | -2.826065000 | -1.674611000 | -0.126240000 | C | -4.322329000 | 1.714220000  | 0.467212000  |
| H  | -1.204979000 | -2.483079000 | -1.385722000 | C | -2.077968000 | 2.555551000  | 1.189407000  |
| H  | -2.659631000 | -1.994627000 | -2.311688000 | H | -1.940722000 | 3.082582000  | 0.223615000  |
| H  | -2.695265000 | -3.489945000 | -1.316885000 | H | -2.576702000 | 3.258924000  | 1.892526000  |
| H  | -4.729822000 | -1.047587000 | -1.057772000 | H | -1.073071000 | 2.317024000  | 1.588347000  |
| H  | -4.816376000 | -1.194727000 | 0.733807000  | H | 2.529120000  | -1.019287000 | -1.429346000 |
| H  | -4.759788000 | -2.660314000 | -0.281840000 | H | 1.074926000  | -2.389234000 | 0.425800000  |
| C  | -2.312396000 | -2.446470000 | -1.360497000 | H | 1.317874000  | 1.846586000  | 1.706313000  |
| C  | -4.365428000 | -1.624484000 | -0.182494000 |   |              |              |              |

## 4.5 Model system $[\text{Cp}^{\text{H}}\text{CoAs}_3]^- + \text{PR}_2^+$

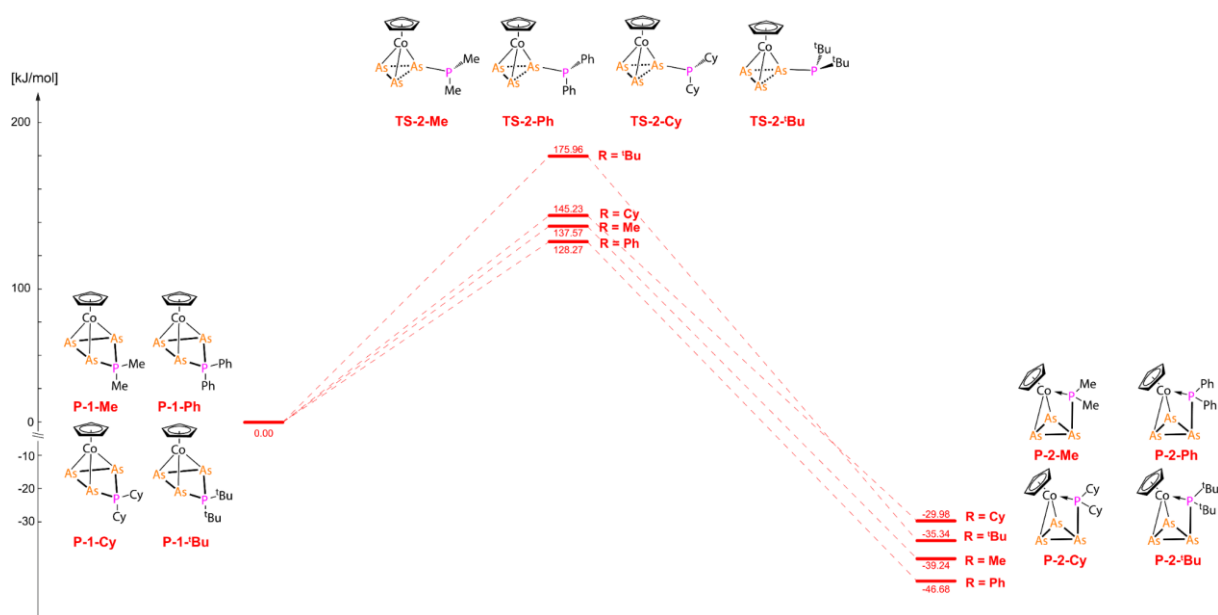

**Figure S76.** Pathway of the reaction of  $[\text{Cp}^{\text{H}}\text{CoAs}_3]^-$  with  $\text{PR}_2^+$ . Optimization conducted at the BP86/def2-SVP level of theory. Energy values obtained from single point calculation at the B3LYP/def2-SVP level of theory including solvent effects and dispersion correction (GD3BJ).

**Table S60:** Total energies for optimized geometries, optimization at the BP86/def2-SVP level and single point energies at the B3LYP/def2-TZVP level of theory including solvent effects and dispersion correction GD3BJ.

|                 | BP86/def2-SVP<br>total energy [Ha] | B3LYP/def2-TZVP<br>total energy [Ha] |
|-----------------|------------------------------------|--------------------------------------|
| <b>P-1-Me</b>   | -8705.05420539                     | -8705.61204268                       |
| <b>P-1-Ph</b>   | -9088.24605594                     | -9089.25634431                       |
| <b>P-1-Cy</b>   | -9095.48352808                     | -9096.52764173                       |
| <b>P-1-tBu</b>  | -8940.73388329                     | -8941.60281114                       |
| <b>TS-2-Me</b>  | -8705.01278625                     | -8705.55963690                       |
| <b>TS-2-Ph</b>  | -9088.19906530                     | -9089.20748899                       |
| <b>TS-2-Cy</b>  | -9095.42694825                     | -9096.47232593                       |
| <b>TS-2-tBu</b> | -8940.68016627                     | -8941.53617343                       |
| <b>P-2-Me</b>   | -8705.06844349                     | -8705.62698683                       |
| <b>P-2-Ph</b>   | -9088.26071554                     | 9089.27412497                        |
| <b>P-2-Cy</b>   | -9095.49195168                     | -9096.53906143                       |
| <b>P-2-tBu</b>  | -8940.74333781                     | -8941.61627172                       |

**Table S61:** Optimized geometry of **P-1-Me**. XYZ coordinated in angstroms. BP86/def2-SVP level of theory.

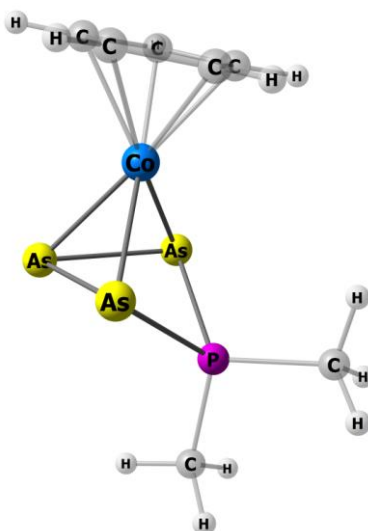

|    |              |              |              |   |              |              |              |
|----|--------------|--------------|--------------|---|--------------|--------------|--------------|
| Co | 0.687011000  | 0.327103000  | -0.555674000 | H | 1.082888000  | 1.903304000  | 1.790755000  |
| As | -0.655710000 | -1.618397000 | -0.785711000 | H | 2.052415000  | 2.842410000  | -0.590038000 |
| P  | -2.482007000 | -0.269947000 | -0.194876000 | H | 2.891773000  | -1.490736000 | -0.392044000 |
| As | -0.419646000 | 0.018064000  | -2.620394000 | H | 1.601699000  | -0.775204000 | 1.913122000  |
| As | -1.279642000 | 1.603919000  | -0.933600000 | C | -2.867503000 | -0.261456000 | 1.616680000  |
| C  | 2.678007000  | 0.694833000  | -0.948291000 | H | -3.612314000 | 0.527602000  | 1.851198000  |
| H  | 3.153392000  | 0.741759000  | -1.936704000 | H | -3.268671000 | -1.247148000 | 1.932640000  |
| C  | 1.849724000  | -0.106097000 | 1.078833000  | H | -1.929315000 | -0.054517000 | 2.167560000  |
| C  | 2.538014000  | -0.483730000 | -0.135704000 | C | -4.118250000 | -0.623332000 | -0.991564000 |
| C  | 2.095092000  | 1.802846000  | -0.240180000 | H | -3.971882000 | -0.645353000 | -2.089029000 |
| C  | 1.576536000  | 1.304270000  | 1.014401000  | H | -4.505941000 | -1.606798000 | -0.653030000 |
|    |              |              |              | H | -4.850111000 | 0.170685000  | -0.734598000 |

**Table S62:** Optimized geometry of **P-1-Ph**. XYZ coordinated in angstroms. BP86/def2-SVP level of theory.

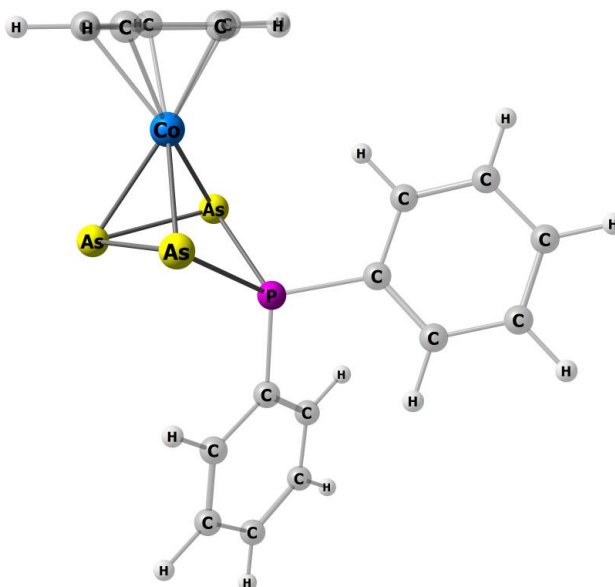

|    |              |              |              |   |              |              |              |
|----|--------------|--------------|--------------|---|--------------|--------------|--------------|
| Co | 1.013238000  | -0.485771000 | 0.535020000  | H | -4.839609000 | 3.596823000  | -2.012885000 |
| As | -0.157871000 | -2.528469000 | 0.760075000  | C | -3.740851000 | 1.965808000  | -1.091523000 |
| As | -0.869603000 | -0.504230000 | 1.968735000  | H | -4.441449000 | 1.197364000  | -1.453754000 |
| As | -0.464172000 | -1.084271000 | -1.215705000 | C | -3.987741000 | -2.204253000 | -0.800168000 |
| C  | 3.022892000  | -0.908341000 | 0.731551000  | H | -3.138863000 | -2.543498000 | -1.416483000 |

|   |              |              |              |   |              |              |              |
|---|--------------|--------------|--------------|---|--------------|--------------|--------------|
| H | 3.471258000  | -1.901664000 | 0.863021000  | C | -5.196416000 | -2.922163000 | -0.798887000 |
| C | 2.589533000  | -0.031779000 | 1.787885000  | C | -3.851573000 | -1.045716000 | -0.005371000 |
| C | 2.054307000  | 1.163377000  | 1.176257000  | H | -5.296803000 | -3.822369000 | -1.425845000 |
| H | 1.658088000  | 2.035640000  | 1.713005000  | C | -6.269477000 | -2.496661000 | -2.496661000 |
| C | 2.773619000  | -0.256334000 | -0.525435000 | C | -4.931960000 | -0.623617000 | 0.804985000  |
| C | 2.166783000  | 1.026537000  | -0.251133000 | H | -4.832452000 | 0.273700000  | 1.437305000  |
| P | -2.233056000 | -0.168333000 | 0.057917000  | C | -6.134736000 | -1.347780000 | 0.805226000  |
| C | -1.956622000 | 3.942177000  | -0.179597000 | H | -6.972446000 | -1.014488000 | 1.438500000  |
| H | -1.257221000 | 4.713878000  | 0.179633000  | H | -7.214229000 | -3.063260000 | 0.007029000  |
| C | -1.726817000 | 2.593843000  | 0.137644000  | H | -3.254586000 | 5.365717000  | -1.197452000 |
| C | -3.075020000 | 4.307205000  | -0.950803000 | H | 1.862825000  | 1.769856000  | -0.999450000 |
| H | -0.845628000 | 2.302079000  | 0.731401000  | H | 3.001467000  | -0.663789000 | -1.518994000 |
| C | -2.621332000 | 1.593786000  | -0.310685000 | H | 2.658282000  | -0.233797000 | 2.864512000  |
| C | -3.963600000 | 3.316769000  | -1.406195000 |   |              |              |              |

**Table S63:** Optimized geometry of **P-1-Cy**. XYZ coordinated in angstroms. BP86/def2-SVP level of theory.

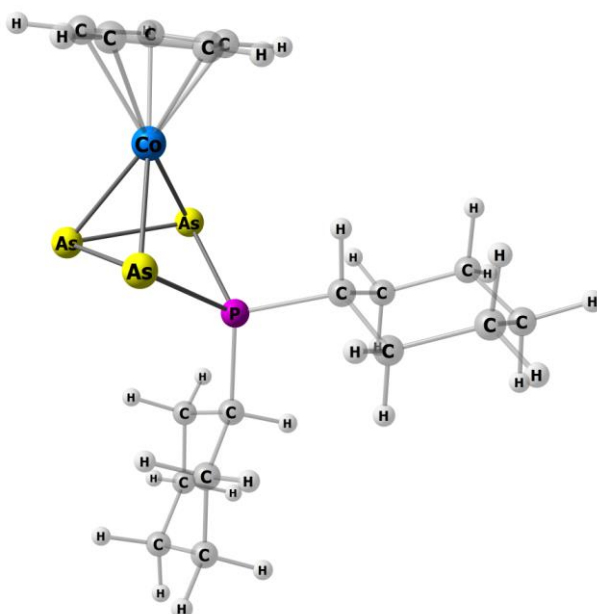

|    |              |              |              |   |              |              |              |
|----|--------------|--------------|--------------|---|--------------|--------------|--------------|
| As | -0.545428000 | -0.529930000 | -1.645614000 | C | -4.092949000 | -1.629690000 | -1.333048000 |
| As | -0.335506000 | -0.680791000 | 1.630635000  | H | -4.245482000 | -0.701106000 | -1.923457000 |
| As | 0.487583000  | -2.190508000 | -0.138824000 | H | -3.265622000 | -2.181508000 | -1.834900000 |
| Co | 1.137515000  | 0.076641000  | -0.076473000 | C | -5.373587000 | -2.486731000 | -1.347941000 |
| P  | -2.080237000 | -0.236239000 | 0.111857000  | H | -6.222829000 | -1.884026000 | -0.950104000 |
| C  | 2.579217000  | 0.876569000  | -1.318596000 | H | -5.639322000 | -2.743487000 | -2.396351000 |
| H  | 2.710916000  | 0.677748000  | -2.390071000 | C | -3.579411000 | 2.018532000  | -0.860712000 |
| C  | 1.758389000  | 1.917641000  | -0.740082000 | H | -4.522814000 | 1.425957000  | -0.838620000 |
| C  | 2.770575000  | 0.737219000  | 1.000406000  | H | -3.106877000 | 1.828362000  | -1.848824000 |
| C  | 3.193975000  | 0.148319000  | -0.241819000 | C | -3.249542000 | 1.847659000  | 1.666691000  |
| C  | 1.876571000  | 1.831094000  | 0.690263000  | H | -4.175213000 | 1.243852000  | 1.812352000  |
| H  | 1.394076000  | 2.494088000  | 1.420272000  | H | -2.541124000 | 1.536554000  | 2.465384000  |
| C  | -2.648727000 | 1.546840000  | 0.275945000  | C | -3.923630000 | 3.513544000  | -0.707651000 |
| H  | -1.679268000 | 2.090568000  | 0.189283000  | H | -2.996399000 | 4.115278000  | -0.847645000 |
| C  | -5.215005000 | -3.761388000 | -0.501922000 | H | -4.622093000 | 3.825250000  | -1.514139000 |
| H  | -4.450560000 | -4.420239000 | -0.974087000 | C | -3.600039000 | 3.342044000  | 1.809009000  |
| H  | -6.163655000 | -4.340542000 | -0.493425000 | H | -4.069187000 | 3.526731000  | 2.799580000  |
| C  | -3.490701000 | -2.577951000 | 0.953190000  | H | -2.659340000 | 3.938822000  | 1.793450000  |
| H  | -2.643423000 | -3.173261000 | 0.544373000  | C | -4.524697000 | 3.818701000  | 0.675404000  |
| H  | -3.208437000 | -2.320811000 | 1.996515000  | H | -5.510320000 | 3.305913000  | 0.767061000  |
| C  | -4.775976000 | -3.426831000 | 0.933781000  | H | -4.731066000 | 4.906088000  | 0.776135000  |
| H  | -4.619199000 | -4.357532000 | 1.520689000  | H | 1.170789000  | 2.658429000  | -1.297752000 |
| H  | -5.593053000 | -2.868646000 | 1.447540000  | H | 3.075779000  | 0.415638000  | 2.004563000  |
| C  | -3.654428000 | -1.294817000 | 0.110449000  | H | 3.872476000  | -0.707823000 | -0.349725000 |
| H  | -4.435407000 | -0.655136000 | 0.586378000  |   |              |              |              |



**Table S64:** Optimized geometry of **P-1-<sup>t</sup>Bu**. XYZ coordinated in angstroms. BP86/def2-SVP level of theory.

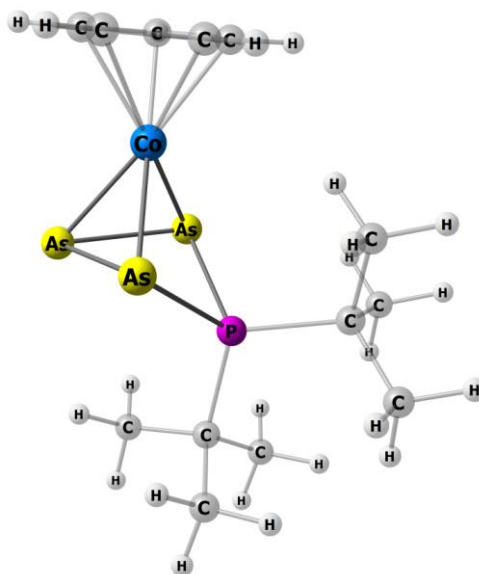

|    |              |              |              |   |              |              |              |
|----|--------------|--------------|--------------|---|--------------|--------------|--------------|
| Co | 0.670378000  | 0.029125000  | -0.383315000 | H | -4.409871000 | 1.796063000  | 2.764743000  |
| As | -0.857474000 | -1.756688000 | -0.000958000 | H | -5.235653000 | 0.834935000  | 1.507335000  |
| P  | -2.649825000 | -0.199276000 | -0.072135000 | C | -1.832789000 | 1.303732000  | 2.157783000  |
| As | -0.340231000 | -0.925013000 | -2.265673000 | H | -0.890301000 | 0.729335000  | 2.077176000  |
| As | -1.190383000 | 1.190953000  | -1.329473000 | H | -1.979500000 | 1.611764000  | 3.216727000  |
| C  | 2.246581000  | 1.335709000  | -0.651366000 | H | -1.712671000 | 2.222955000  | 1.547993000  |
| H  | 2.331852000  | 2.114874000  | -1.419708000 | C | -5.000038000 | 0.518997000  | -1.506676000 |
| C  | 2.408037000  | -0.707360000 | 0.460943000  | H | -5.393507000 | 1.153716000  | -0.690256000 |
| C  | 2.694087000  | -0.026719000 | -0.773269000 | H | -5.863377000 | 0.214019000  | -2.138837000 |
| C  | 1.666611000  | 1.493012000  | 0.662494000  | H | -4.329102000 | 1.140447000  | -2.136434000 |
| C  | -3.051949000 | 0.472482000  | 1.705596000  | C | -5.183348000 | -1.592161000 | -0.082661000 |
| C  | 1.769414000  | 0.234801000  | 1.351116000  | H | -4.651354000 | -2.481981000 | 0.313830000  |
| H  | 1.449778000  | 0.031828000  | 2.381720000  | H | -6.046028000 | -1.964029000 | -0.678928000 |
| C  | -4.274943000 | -0.743351000 | -0.994330000 | H | -5.600797000 | -1.022485000 | 0.770724000  |
| C  | -3.216743000 | -0.734708000 | 2.654237000  | C | -3.860367000 | -1.604872000 | -2.205307000 |
| H  | -4.101172000 | -1.354470000 | 2.411407000  | H | -3.216244000 | -1.047611000 | -2.913958000 |
| H  | -3.339114000 | -0.369140000 | 3.697800000  | H | -4.779897000 | -1.917095000 | -2.748348000 |
| H  | -2.321374000 | -1.391309000 | 2.632883000  | H | -3.313620000 | -2.519581000 | -1.899308000 |
| C  | -4.298864000 | 1.377648000  | 1.739796000  | H | 1.241813000  | 2.419601000  | 1.070251000  |
| H  | -4.207201000 | 2.236582000  | 1.043417000  | H | 3.175727000  | -0.469220000 | -1.654834000 |
|    |              |              |              | H | 2.636440000  | -1.757187000 | 0.686286000  |

**Table S65:** Optimized geometry of **TS-2-Me**. XYZ coordinated in angstroms. BP86/def2-SVP level of theory.



|    |              |              |              |   |              |              |              |
|----|--------------|--------------|--------------|---|--------------|--------------|--------------|
| Co | -1.587961000 | -0.663706000 | -0.487829000 | H | -4.426861000 | -1.149284000 | -0.665216000 |
| P  | 2.199702000  | -0.183659000 | 0.617345000  | H | -1.402672000 | 0.444732000  | 2.131701000  |
| As | -0.165253000 | -2.554468000 | -0.263836000 | H | -1.543485000 | 2.129582000  | -0.021819000 |
| As | 0.631617000  | -0.382202000 | -1.265781000 | C | 3.525086000  | -1.419707000 | 0.144452000  |
| As | -1.185110000 | -1.982607000 | -2.315699000 | H | 4.429018000  | -1.216755000 | 0.759267000  |
| C  | -2.059804000 | 0.329046000  | 1.260654000  | H | 3.170988000  | -2.445371000 | 0.370298000  |
| C  | -3.117910000 | 0.696987000  | -0.794859000 | H | 3.805606000  | -1.363782000 | -0.928258000 |
| H  | -3.418235000 | 1.148716000  | -1.748982000 | C | 3.051939000  | 1.371299000  | 0.002015000  |
| C  | -2.126944000 | 1.209972000  | 0.116367000  | H | 3.935185000  | 1.566194000  | 0.648975000  |
| C  | -2.998232000 | -0.737997000 | 1.042642000  | H | 3.398273000  | 1.295171000  | -1.050732000 |
| H  | -3.187678000 | -1.578441000 | 1.723081000  | H | 2.364629000  | 2.236530000  | 0.095308000  |
| C  | -3.651417000 | -0.511573000 | -0.220607000 |   |              |              |              |

**Table S66:** Optimized geometry of **TS-2-Ph**. XYZ coordinated in angstroms. BP86/def2-SVP level of theory.

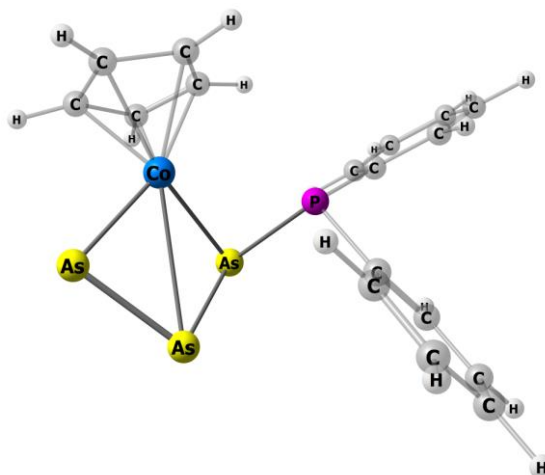

|    |              |              |              |   |             |              |              |
|----|--------------|--------------|--------------|---|-------------|--------------|--------------|
| Co | -1.662115000 | 0.299641000  | -0.474541000 | H | 4.267741000 | 3.790269000  | 2.144466000  |
| As | -0.160755000 | -2.250409000 | -1.613933000 | C | 3.520140000 | 4.490260000  | 0.220445000  |
| As | 0.152050000  | 0.157363000  | -1.989479000 | C | 2.025744000 | 2.960102000  | -0.950200000 |
| As | -2.380894000 | -1.687476000 | -1.274620000 | H | 1.413895000 | 2.723044000  | -1.837318000 |
| C  | -1.670204000 | 2.420051000  | 0.030492000  | C | 2.713373000 | 4.185448000  | -0.889229000 |
| C  | -3.535388000 | 1.069443000  | -0.389012000 | H | 2.625054000 | 4.901362000  | -1.722304000 |
| H  | -4.414519000 | 0.634901000  | -0.882515000 | H | 4.062137000 | 5.448155000  | 0.265781000  |
| C  | -2.610394000 | 2.021541000  | -0.982139000 | C | 2.066657000 | -1.933323000 | 1.281376000  |
| C  | -1.952655000 | 1.655797000  | 1.198989000  | H | 1.088024000 | -1.942276000 | 1.787884000  |
| H  | -1.368662000 | 1.676461000  | 2.128521000  | C | 2.987033000 | -2.972621000 | 1.506772000  |

|   |              |             |              |   |             |              |              |
|---|--------------|-------------|--------------|---|-------------|--------------|--------------|
| C | -3.114402000 | 0.834514000 | 0.961141000  | C | 2.391739000 | -0.865429000 | 0.413143000  |
| H | -3.596330000 | 0.167089000 | 1.686469000  | H | 2.721348000 | -3.800058000 | 2.183960000  |
| H | -0.842763000 | 3.129768000 | -0.093304000 | C | 4.241795000 | -2.952271000 | 0.875057000  |
| H | -2.667477000 | 2.413403000 | -2.006097000 | C | 3.654448000 | -0.856496000 | -0.224928000 |
| P | 1.128469000  | 0.461281000 | 0.141074000  | H | 3.917601000 | -0.032791000 | -0.907513000 |
| C | 2.940368000  | 2.342609000 | 1.219026000  | C | 4.573636000 | -1.890941000 | 0.011324000  |
| H | 3.030915000  | 1.626992000 | 2.052763000  | H | 5.556430000 | -1.871319000 | -0.486827000 |
| C | 3.634601000  | 3.561516000 | 1.271994000  | H | 4.964666000 | -3.763961000 | 1.054878000  |
| C | 2.129618000  | 2.021474000 | 0.102042000  |   |             |              |              |

**Table S67:** Optimized geometry of **TS-2-Cy**. XYZ coordinated in angstroms. BP86/def2-SVP level of theory.

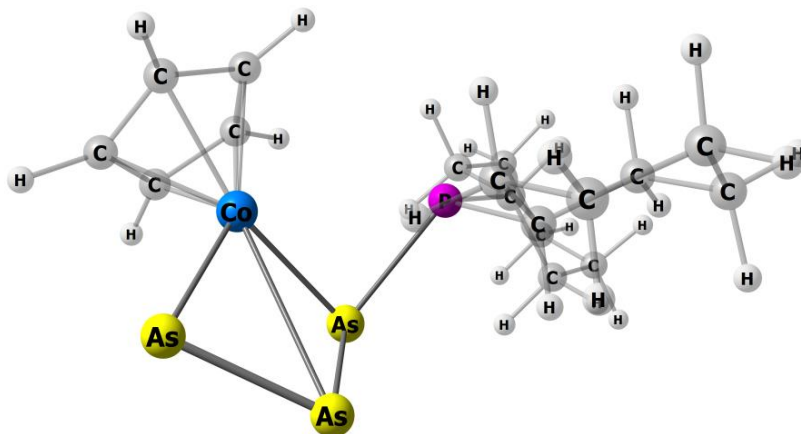

|    |              |              |              |   |              |              |              |
|----|--------------|--------------|--------------|---|--------------|--------------|--------------|
| Co | 1.756173000  | 0.006309000  | -0.266433000 | H | -0.769515000 | -2.365811000 | -0.283572000 |
| As | 0.399253000  | -1.558321000 | 2.246014000  | C | -2.705838000 | -3.366807000 | -0.494795000 |
| As | 0.404027000  | 0.783800000  | 1.520172000  | H | -2.993622000 | 1.985696000  | -0.915605000 |
| As | 2.415716000  | -1.664145000 | 1.110671000  | C | -2.838419000 | 2.385203000  | 1.219285000  |
| C  | 1.701103000  | 0.825000000  | -2.291689000 | H | -4.229457000 | 0.288432000  | -0.067129000 |
| C  | 3.204532000  | 1.368823000  | -0.622345000 | H | -3.688355000 | -0.343876000 | -1.645226000 |
| H  | 3.740585000  | 1.920165000  | 0.161191000  | C | -4.704909000 | -1.809809000 | -0.389414000 |
| C  | 2.070038000  | 1.844366000  | -1.373988000 | C | -3.703205000 | 3.660909000  | 1.231670000  |
| C  | 2.629429000  | -0.276974000 | -2.166832000 | H | -4.572749000 | 3.523761000  | 0.547667000  |
| H  | 2.621605000  | -1.199860000 | -2.760554000 | H | -4.129031000 | 3.817974000  | 2.246638000  |
| C  | 3.583113000  | 0.072109000  | -1.158459000 | C | -2.895291000 | 4.891672000  | 0.787884000  |
| H  | 4.452539000  | -0.523746000 | -0.850754000 | H | -3.443510000 | 1.505880000  | 1.526695000  |
| H  | 0.835860000  | 0.854574000  | -2.965932000 | H | -2.026630000 | 2.478432000  | 1.976680000  |
| H  | 1.548639000  | 2.796719000  | -1.219034000 | H | -1.617627000 | 5.538252000  | -0.870825000 |
| C  | -2.363863000 | -0.885664000 | 0.004510000  | H | -3.031586000 | 4.573989000  | -1.360818000 |
| P  | -1.134762000 | 0.558998000  | -0.249035000 | H | -2.267502000 | -4.251023000 | -1.006263000 |
| C  | -2.188946000 | 2.145286000  | -0.160724000 | H | -2.755449000 | -3.626788000 | 0.587545000  |
| H  | -0.512583000 | 3.514644000  | 0.092546000  | C | -4.121976000 | -3.083785000 | -1.022205000 |
| C  | -1.376371000 | 3.382441000  | -0.600600000 | H | -2.103156000 | 5.100186000  | 1.543603000  |
| H  | -0.949831000 | 3.221279000  | -1.614107000 | H | -3.543415000 | 5.794248000  | 0.759122000  |
| C  | -2.237708000 | 4.661442000  | -0.583223000 | H | -4.081403000 | -2.956731000 | -2.128905000 |
| H  | -2.454536000 | -1.077397000 | 1.097627000  | H | -4.792074000 | -3.950488000 | -0.833223000 |
| C  | -1.784117000 | -2.147939000 | -0.677426000 | H | -4.872398000 | -1.983203000 | 0.698477000  |
| C  | -3.771585000 | -0.592997000 | -0.561239000 | H | -5.702126000 | -1.578419000 | -0.823683000 |
| H  | -1.656430000 | -1.934290000 | -1.763725000 |   |              |              |              |

**Table S68:** Optimized geometry of **TS-2-<sup>t</sup>Bu**. XYZ coordinated in angstroms. BP86/def2-SVP level of theory.

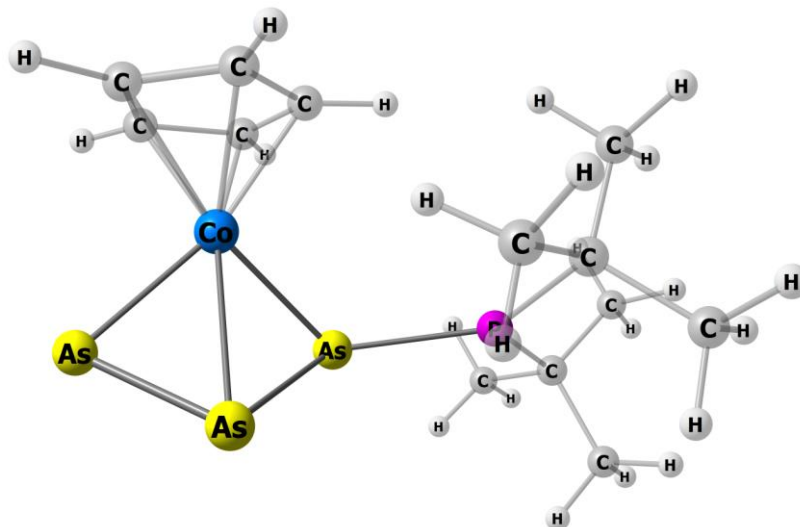

|    |              |              |              |   |              |              |              |
|----|--------------|--------------|--------------|---|--------------|--------------|--------------|
| Co | 1.626689000  | -0.354166000 | -0.185457000 | H | -5.188044000 | -3.042772000 | 0.459622000  |
| P  | -2.293465000 | -0.524604000 | 0.111611000  | C | -4.833575000 | -0.828849000 | -1.161945000 |
| As | 0.456981000  | 1.500198000  | -1.633105000 | C | -4.371019000 | -2.367209000 | 0.800570000  |
| As | -0.427122000 | -0.773104000 | -1.207204000 | C | -3.194534000 | -2.721388000 | -1.386975000 |
| As | 2.518433000  | 0.526184000  | -2.055424000 | H | -2.422192000 | -3.352944000 | -0.902561000 |
| C  | 2.070355000  | 0.003396000  | 1.873727000  | H | -4.026548000 | -3.384685000 | -1.712943000 |
| C  | 2.028573000  | -2.082888000 | 0.835252000  | H | -2.749703000 | -2.269149000 | -2.296571000 |
| H  | 1.715431000  | -3.088589000 | 0.527627000  | C | -2.568995000 | 0.571784000  | 1.671351000  |
| C  | 1.304728000  | -1.198170000 | 1.711526000  | H | -4.785720000 | 0.524563000  | 1.662431000  |
| C  | 3.275043000  | -0.126281000 | 1.106185000  | H | -4.071342000 | 1.846065000  | 0.674033000  |
| H  | 4.075451000  | 0.620423000  | 1.026558000  | H | -4.060202000 | 1.944900000  | 2.468662000  |
| C  | 3.247832000  | -1.413551000 | 0.452150000  | H | -1.599647000 | 2.323639000  | 0.749374000  |
| H  | 4.033723000  | -1.823331000 | -0.195442000 | H | -0.458168000 | 1.211061000  | 1.555991000  |
| H  | 1.780333000  | 0.878824000  | 2.469081000  | H | -1.522280000 | 2.273751000  | 2.545806000  |
| H  | 0.321540000  | -1.404099000 | 2.152069000  | C | -3.952242000 | 1.253065000  | 1.603126000  |
| C  | -3.755043000 | -1.654232000 | -0.422086000 | C | -1.472129000 | 1.653340000  | 1.623383000  |
| H  | -4.407761000 | -0.321795000 | -2.051058000 | C | -2.448546000 | -0.242511000 | 2.977759000  |
| H  | -5.288222000 | -0.053652000 | -0.514149000 | H | -1.447025000 | -0.705504000 | 3.080301000  |
| H  | -5.653287000 | -1.500455000 | -1.505389000 | H | -2.600998000 | 0.427012000  | 3.855096000  |
| H  | -4.819165000 | -1.658938000 | 1.526574000  | H | -3.202925000 | -1.051088000 | 3.039790000  |
| H  | -3.620176000 | -2.983868000 | 1.335412000  |   |              |              |              |

**Table S69:** Optimized geometry of **P-2-Me**. XYZ coordinated in angstroms. BP86/def2-SVP level of theory.

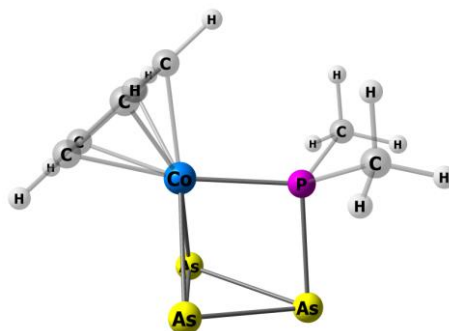

|    |              |              |              |   |              |              |              |
|----|--------------|--------------|--------------|---|--------------|--------------|--------------|
| Co | -0.826990000 | -0.356883000 | -0.520498000 | C | -2.693732000 | -0.855500000 | 0.270993000  |
| P  | 1.328435000  | -0.383937000 | -0.529437000 | H | -3.307979000 | -1.722013000 | -0.007231000 |
| As | -0.644726000 | -2.280446000 | -1.971648000 | H | -0.356681000 | 0.864636000  | 2.000800000  |
| As | 1.577051000  | -1.291459000 | -2.661196000 | H | -1.598864000 | 2.351336000  | 0.076424000  |
| As | -0.623261000 | -0.071333000 | -2.909828000 | C | 2.224628000  | -1.434872000 | 0.714313000  |
| C  | -1.134627000 | 0.504423000  | 1.313718000  | H | 2.062259000  | -1.027279000 | 1.734516000  |
| C  | -2.746765000 | 0.441177000  | -0.348894000 | H | 1.814481000  | -2.462863000 | 0.675879000  |
| H  | -3.407552000 | 0.726604000  | -1.178014000 | H | 3.314434000  | -1.464577000 | 0.505852000  |
| C  | -1.787235000 | 1.293991000  | 0.300577000  | C | 2.260064000  | 1.220693000  | -0.419094000 |
| C  | -1.700885000 | -0.823019000 | 1.308900000  | H | 2.102043000  | 1.679486000  | 0.579820000  |
| H  | -1.433784000 | -1.648054000 | 1.980780000  | H | 3.347618000  | 1.064875000  | -0.577158000 |
|    |              |              |              | H | 1.872551000  | 1.913691000  | -1.191081000 |

**Table S70:** Optimized geometry of **P-2-Ph**. XYZ coordinated in angstroms. BP86/def2-SVP level of theory.

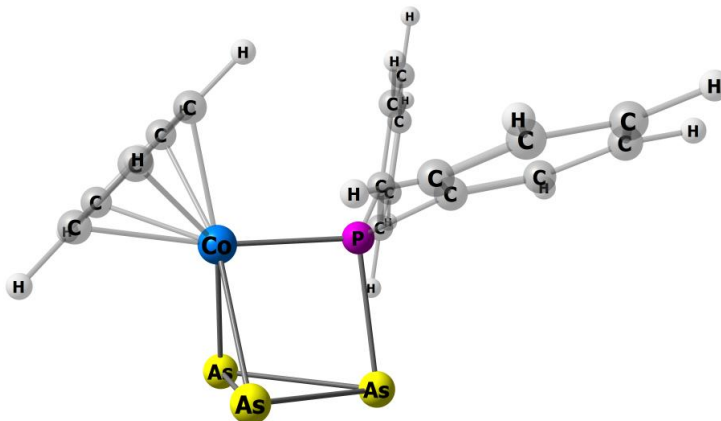

|    |              |              |              |   |              |              |              |
|----|--------------|--------------|--------------|---|--------------|--------------|--------------|
| Co | 1.128915000  | -0.074908000 | 1.026458000  | H | -0.296175000 | 2.643414000  | 1.067739000  |
| P  | -0.708096000 | 0.015202000  | -0.118464000 | C | -1.807272000 | 1.500820000  | 0.010021000  |
| As | 2.094277000  | 1.173176000  | -0.801790000 | C | -3.369018000 | 3.854208000  | 0.106853000  |
| As | 0.329907000  | 0.056864000  | -2.218732000 | H | -3.979446000 | 4.770518000  | 0.145663000  |
| As | 2.055452000  | -1.222691000 | -0.897594000 | C | -2.647913000 | -3.617133000 | -0.719011000 |
| C  | 0.780638000  | -1.184226000 | 2.756608000  | H | -2.566748000 | -4.466590000 | -1.415922000 |
| C  | -2.848944000 | -1.439397000 | 1.045240000  | C | 0.406966000  | 0.201598000  | 2.936699000  |
| H  | -2.941305000 | -0.586716000 | 1.737555000  | H | -0.595088000 | 0.567532000  | 3.197320000  |
| C  | -3.694603000 | -2.550588000 | 1.199367000  | C | -3.873453000 | 2.696583000  | -0.514519000 |
| H  | -4.437258000 | -2.562070000 | 2.013355000  | H | -4.878785000 | 2.705474000  | -0.965549000 |
| C  | -3.098764000 | 1.526211000  | -0.566176000 | C | 1.571430000  | 1.019485000  | 2.741076000  |
| H  | -3.501126000 | 0.625416000  | -1.056635000 | C | -3.596503000 | -3.642840000 | 0.318070000  |
| C  | -1.800357000 | -2.506702000 | -0.876105000 | H | -4.261417000 | -4.512750000 | 0.439216000  |
| H  | -1.056265000 | -2.494797000 | -1.689612000 | C | -2.084243000 | 3.837082000  | 0.676948000  |
| C  | -1.894082000 | -1.404013000 | 0.001235000  | H | -1.683307000 | 4.740573000  | 1.163808000  |
| C  | 2.665408000  | 0.141646000  | 2.413365000  | H | 2.769080000  | -2.112373000 | 2.223640000  |
| H  | 3.695719000  | 0.447987000  | 2.189952000  | H | 0.114965000  | -2.051911000 | 2.845569000  |
| C  | 2.174693000  | -1.212884000 | 2.430495000  | H | 1.624834000  | 2.111030000  | 2.841388000  |
| C  | -1.306850000 | 2.667006000  | 0.629582000  |   |              |              |              |

**Table S71:** Optimized geometry of **P-2-Cy**. XYZ coordinated in angstroms. BP86/def2-SVP level of theory.

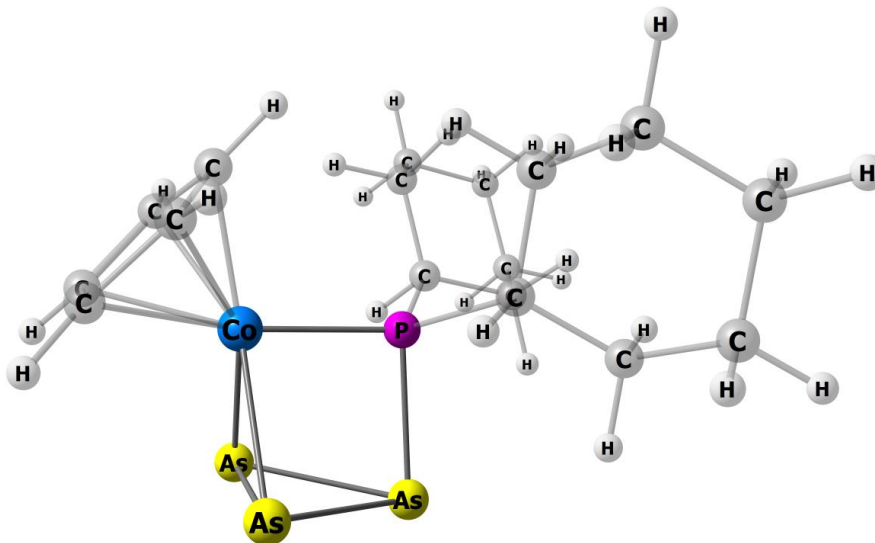

|    |              |              |              |   |              |              |              |
|----|--------------|--------------|--------------|---|--------------|--------------|--------------|
| As | -0.605545000 | -0.520626000 | -2.521096000 | H | 1.284712000  | 2.472256000  | 0.573461000  |
| As | -1.139019000 | 1.589527000  | -1.504263000 | C | 1.957130000  | 1.405714000  | 2.319063000  |
| As | 1.180358000  | 1.253236000  | -2.437569000 | H | 3.601665000  | -0.345272000 | -2.343362000 |
| Co | -0.652367000 | -0.320225000 | -0.114396000 | H | 4.568692000  | 0.037656000  | -0.895746000 |
| C  | -1.041271000 | -2.184564000 | 0.734676000  | C | 4.810131000  | -2.010163000 | -1.595150000 |
| C  | -2.225151000 | -1.670246000 | 0.101559000  | C | 2.263495000  | 2.668773000  | 3.148615000  |
| H  | -2.780134000 | -2.148903000 | -0.716239000 | H | 1.467567000  | 3.426120000  | 2.962551000  |
| C  | -0.648983000 | -1.229256000 | 1.739423000  | H | 2.218688000  | 2.429860000  | 4.233540000  |
| H  | 0.206753000  | -1.332541000 | 2.418996000  | C | 3.631196000  | 3.271742000  | 2.784540000  |
| C  | -2.562699000 | -0.415867000 | 0.719243000  | H | 0.944596000  | 1.023612000  | 2.562113000  |
| C  | -1.592897000 | -0.139839000 | 1.743062000  | H | 2.678744000  | 0.605677000  | 2.597631000  |
| C  | 2.732284000  | -1.075511000 | -0.469154000 | H | 4.744778000  | 3.938760000  | 1.018929000  |
| P  | 1.433931000  | 0.301073000  | -0.311940000 | H | 3.011869000  | 4.348315000  | 0.995640000  |
| C  | 2.054829000  | 1.698522000  | 0.806561000  | H | 4.402347000  | -3.342373000 | 1.624843000  |
| H  | 4.225619000  | 1.527797000  | 0.644806000  | H | 3.433488000  | -3.736210000 | 0.183412000  |
| C  | 3.435021000  | 2.285218000  | 0.443532000  | C | 5.259906000  | -2.638710000 | -0.265066000 |
| H  | 3.485491000  | 2.518488000  | -0.642301000 | H | 4.436138000  | 2.560238000  | 3.082554000  |
| C  | 3.735752000  | 3.548793000  | 1.275211000  | H | 3.811297000  | 4.203333000  | 3.363504000  |
| H  | 2.123044000  | -1.845009000 | -0.999143000 | H | 5.948583000  | -1.935017000 | 0.257640000  |
| C  | 3.188692000  | -1.685893000 | 0.873725000  | H | 5.845682000  | -3.564881000 | -0.451135000 |
| C  | 3.946042000  | -0.753796000 | -1.368066000 | H | 4.219910000  | -2.757039000 | -2.174335000 |
| H  | 3.783395000  | -0.933697000 | 1.440371000  | H | 5.691003000  | -1.755323000 | -2.223446000 |
| H  | 2.312162000  | -1.939846000 | 1.506648000  | H | -1.589202000 | 0.726051000  | 2.416790000  |
| C  | 4.058726000  | -2.938988000 | 0.647380000  | H | -3.417439000 | 0.219058000  | 0.450821000  |
|    |              |              |              | H | -0.542992000 | -3.135391000 | 0.508778000  |

**Table S72:** Optimized geometry of **P-2-<sup>t</sup>Bu**. XYZ coordinated in angstroms. BP86/def2-SVP level of theory.

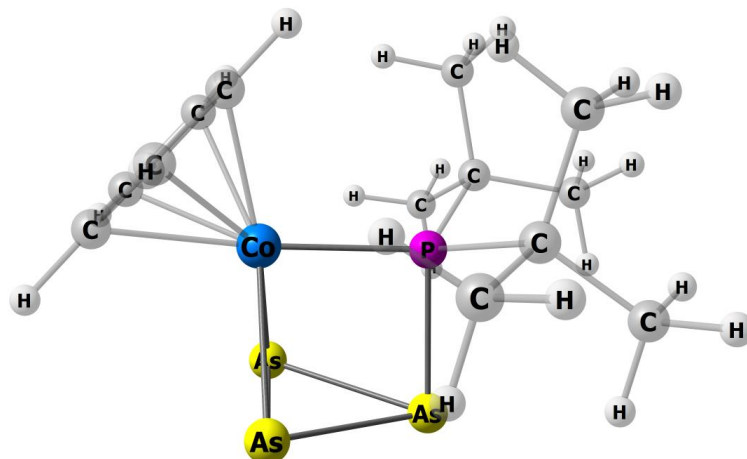

|    |              |              |              |   |              |              |              |
|----|--------------|--------------|--------------|---|--------------|--------------|--------------|
| Co | -0.306835000 | -0.147531000 | -0.073557000 | C | 1.543498000  | 3.237594000  | 0.832323000  |
| P  | 1.789344000  | 0.421376000  | 0.319107000  | H | 1.798455000  | 3.146128000  | 1.904575000  |
| As | 0.586204000  | -2.292019000 | -0.757377000 | H | 1.775517000  | 4.281638000  | 0.525420000  |
| As | 2.650530000  | -0.979851000 | -1.365903000 | H | 0.450498000  | 3.095989000  | 0.722703000  |
| As | 0.382557000  | -0.537703000 | -2.363648000 | C | 2.640518000  | -0.160054000 | 1.988145000  |
| C  | -1.695445000 | 1.406871000  | 0.150723000  | H | 1.449722000  | 1.193097000  | 3.271088000  |
| C  | -2.251674000 | -0.855627000 | 0.164276000  | H | 3.093951000  | 1.817875000  | 2.891912000  |
| H  | -2.620913000 | -1.838095000 | -0.158452000 | H | 2.889391000  | 0.477720000  | 4.053144000  |
| C  | -2.261201000 | 0.345491000  | -0.628748000 | H | 4.737818000  | 0.364687000  | 1.466705000  |
| C  | -1.320698000 | 0.846594000  | 1.428923000  | H | 4.244559000  | -1.288862000 | 0.977591000  |
| H  | -0.872903000 | 1.402723000  | 2.262978000  | H | 4.556891000  | -0.917704000 | 2.700605000  |
| C  | -1.681658000 | -0.544851000 | 1.447672000  | C | 2.506392000  | 0.901766000  | 3.098331000  |
| C  | 2.326300000  | 2.257801000  | -0.068839000 | C | 4.125821000  | -0.509177000 | 1.759392000  |
| H  | 0.861794000  | 2.390560000  | -1.713853000 | C | 1.907514000  | -1.435216000 | 2.454137000  |
| H  | 2.506666000  | 1.921953000  | -2.251321000 | H | 1.988639000  | -2.255756000 | 1.713067000  |
| H  | 2.177006000  | 3.617038000  | -1.759670000 | H | 2.365667000  | -1.788761000 | 3.404549000  |
| H  | 4.431139000  | 1.761197000  | -0.527379000 | H | 0.830588000  | -1.250590000 | 2.632927000  |
| H  | 4.181396000  | 2.376289000  | 1.144142000  | H | -1.567923000 | -1.238229000 | 2.290243000  |
| H  | 4.108133000  | 3.498291000  | -0.242916000 | H | -2.641198000 | 0.431315000  | -1.655295000 |
| C  | 1.943434000  | 2.552860000  | -1.534195000 | H | -1.597367000 | 2.454966000  | -0.158447000 |
| C  | 3.844312000  | 2.470642000  | 0.093012000  |   |              |              |              |

## 5. References

- [1] M. Piesch, F. Dielmann, S. Reichl, M. Scheer, *Chem. Eur. J.* **2020**, *26*, 1518.
- [2] M. Piesch, S. Reichl, C. Riesinger, M. Seidl, G. Balázs, M. Scheer, *Chem. Eur. J.* **Platzhalter**, *Platzhalter*, X - X.
- [3] S. S. Sen, H. W. Roesky, D. Stern, J. Henn, D. Stalke, *J. Am. Chem. Soc.* **2010**, *132*, 1123.
- [4] M. Gonsior, I. Krossing, N. Mitzel, *Z. anorg. allg. Chem.* **2002**, *628*, 1821.
- [5] R. C. Clark, J. S. Reid, *Acta Cryst.* **1995**, *A51*, 887.
- [6] G. M. Sheldrick, *Acta Cryst.* **2015**, *C71*, 3.
- [7] O. V. Dolomanov, I. J. Bourhis, R. J. Gildea, Howard, J. A. K., H. Puschmann, *J. Appl. Cryst.* **2009**, *42*, 339.
- [8] M. J. Frisch, G. W. Trucks, H. B. Schlegel, G. E. Scuseria, M. A. Robb, J. R. Cheeseman, G. Scalmani, V. Barone, B. Mennucci, G. A. Petersson, H. Nakatsuji, M. Caricato, X. Li, H. P. Hratchian, A. F. Izmaylov, J. Bloino, G. Zheng, J. L. Sonnenberg, M. Hada, M. Ehara, K. Toyota, R. Fukuda, J. Hasegawa, M. Ishida, T. Nakajima, Y. Honda, O. Kitao, H. Nakai, T. Vreven, J. A. Montgomery, Jr., J. E. Peralta, F. Ogliaro, M. Bearpark, J. J. Heyd, E. Brothers, K. N. Kudin, V. N. Staroverov, T. Keith, R. Kobayashi, J. Normand, K. Raghavachari, A. Rendell, J. C. Burant, S. S. Iyengar, J. Tomasi, M. Cossi, N. Rega, J. M. Millam, M. Klene, J. E. Knox, J. B. Cross, V. Bakken, C. Adamo, J. Jaramillo, R. Gomperts, R. E. Stratmann, O. Yazyev, A. J. Austin, R. Cammi, C. Pomelli, J. W. Ochterski, R. L. Martin, K. Morokuma, V. G. Zakrzewski, G. A. Voth, P. Salvador, J. J. Dannenberg, S. Dapprich, A.



D. Daniels, O. Farkas, J. B. Foresman, J. V. Ortiz, J. Cioslowski, and D. J. Fox, Gaussian, Inc., Wallingford CT, 2013.

[9] a) J. P. Perdew, *Phys. Rev. B*, 1986, 8822; b) A. D. Becke, *Phys. Rev. A*, 1988, 3098.

[10] A. D. Becke, *J. Chem. Phys.* **1993**, 98, 5648.

[11] a) D. Andrae, U. Häußermann, M. Dolg, H. Stoll, H. Preuß, *Theor. Chim. Acta* **1990**, 77, 123; b) F. Weigend, R. Ahlrichs, *Phys. Chem. Chem. Phys.* **2005**, 7, 3297.

[12] a) G. Scalmani, M. J. Frisch, *J. Chem. Phys.* **2010**, 132, 114110; b) J. Tomasi, B. Mennucci, R. Cammi, *Chem. Rev.* **2005**, 105, 2999.

[13] NBO 6.0. E. D. Glendening, J. K. Badenhoop, A. E. Reed, J. E. Carpenter, J. A. Bohmann, C. M. Morales, C. R. Landis, and F. Weinhold (Theoretical Chemistry Institute, University of Wisconsin, Madison, WI, 2013), <http://nbo6.chem.wisc.edu>.

[14] a) S. Grimme, J. Antony, S. Ehrlich, H. Krieg, *J. Chem. Phys.* **2010**, 132, 154104; b) S. Grimme, S. Ehrlich, L. Goerigk, *J. Comp. Chem.* **2011**, 32, 1456.

[15] Chemcraft - graphical software for visualization of quantum chemistry computations. <https://www.chemcraftprog.com>.
